# Supplementary material for: Analyses of the Root-Knot Nematode (Meloidogyne graminicola) Transcriptome during Host Infection Highlight Specific Gene Expression Profiling in Resistant Rice Plants
Source: MDPI journal article supplement (doi:10.3390/pathogens9080644), 2020-08-08
Supplement: s1 [file s1]

**Table S1.** Summary statistics for the *M. graminicola* Mg\_v2 transcriptome

| <b><i>M. graminicola</i> Mg_v2 transcriptome statistics</b>              |                              |          |
|--------------------------------------------------------------------------|------------------------------|----------|
| Number of sequences                                                      |                              | 44 137   |
| Number of loci                                                           |                              | 29 825   |
| Number of loci with one transcript                                       |                              | 19 769   |
| Number of loci with 2 or more transcripts                                |                              | 10 056   |
| Mean size (bp)                                                           |                              | 1 212    |
| Median size (bp)                                                         |                              | 753      |
| Number of transcripts < 0.5 kb                                           |                              | 16 131   |
| Number of transcripts > 1 kb                                             |                              | 18 014   |
| <b>Blast results (sequences with at least one hit)</b>                   | <b>Number</b>                | <b>%</b> |
| blastn Mg_v2 against <i>M. graminicola</i> (10.895 CDS, [24])            | 22 489                       | 50.95    |
| blastn Mg_v2 against <i>M. graminicola</i> (4.304 contigs, [24])         | 25 392                       | 57.53    |
| blastx Mg_v2 against <i>M. incognita</i> v3 (43.718 proteins, [25])      | 27 340                       | 61.94    |
| blastx Mg_v2 against <i>M. hapla</i> (14.420 proteins, [27])             | 25 398                       | 57.54    |
| blastx Mg_v2 against <i>C. elegans</i> (26.150 proteins, [28])           | 22 382                       | 50.71    |
| blastx Mg_v2 against nr (Swissprot)                                      | 23 596                       | 53.46    |
| Mg_v2 sequences with no hit                                              | 7095                         | 16.07    |
| blastn Mg_ <i>M. graminicola</i> (10.895 CDS, [24]) against Mg_v2        | 9 511                        | 87.30    |
| tblastn Mg_ <i>M. incognita</i> v3 (43.718 proteins, [25]) against Mg_v2 | 34 057                       | 77.90    |
| <b>Library name and number of read pairs</b>                             | <b>mapped reads on Mg_v2</b> | <b>%</b> |
| J2A (34 024 074)                                                         | 47 769 368                   | 70.20    |
| J2B (31 774 556)                                                         | 43 336 949                   | 68.19    |
| Nip2A (32 263 267)                                                       | 374 340                      | 0.58     |
| Nip2B (36 026 736)                                                       | 294 708                      | 0.41     |
| Nip4A (30 335 264)                                                       | 1 082 875                    | 1.78     |
| Nip4B (35 280 340)                                                       | 860 458                      | 1.22     |
| Nip8A (35 015 567)                                                       | 6 792 880                    | 9.70     |
| Nip8B (36 776 218)                                                       | 3 407 061                    | 4.63     |
| Tog2A (33 556 047)                                                       | 635 336                      | 0.95     |
| Tog2B (44 016 997)                                                       | 669 538                      | 0.76     |
| Tog4A (41 467 625)                                                       | 1 436 869                    | 1.73     |
| Tog4B (40 418 360)                                                       | 1 393 648                    | 1.72     |
| Tog8A (36 199 434)                                                       | 3 144 207                    | 4.34     |
| Tog8B (32 759 506)                                                       | 2 499 263                    | 3.81     |
