# Supplementary material for: Analyses of the Root-Knot Nematode (Meloidogyne graminicola) Transcriptome during Host Infection Highlight Specific Gene Expression Profiling in Resistant Rice Plants
Source: MDPI journal article supplement (doi:10.3390/pathogens9080644), 2020-08-08

**Figure S1. *Meloidogyne graminicola* colonization and reproduction in resistant TOG5681 (R) and susceptible Nipponbare (S) rice roots.** Nematode colonization and reproduction were determined after plant inoculation with 100 (for S) or 400 (for R) second-stage juveniles (J2). **A.** Number of nematodes stained with fuchsin in R and S rice roots at 7 days after plant inoculation. Boxplots represent data of three independent biological replicates with 10 plants per condition (n =5;3). Mean nematode numbers were not statistically different with Kruskal-Wallis rank sum test (Kruskal-Wallis chi-squared = 13.253, df = 8, p-value = 0.1034). **B.** Number of next-generation J2 obtained from R and S rice roots collected at 35 days after plant inoculation. Boxplots represent data of three independent biological replicates with 16 plants per condition (n =8;3). Mean nematode numbers were statistically different with Kruskal-Wallis rank sum test (Kruskal-Wallis chi-squared = 41.913, df = 5, p-value = 6.135e-08).

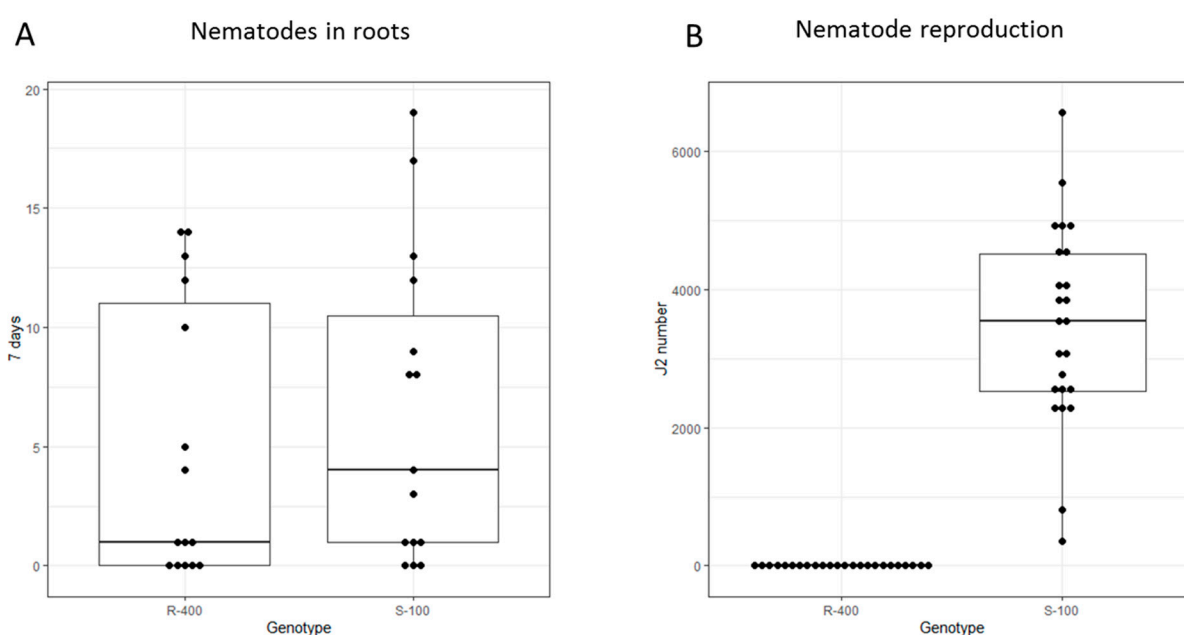

Supplement: s1 [file s1]
