# Supplementary material for: Analyses of the Root-Knot Nematode (Meloidogyne graminicola) Transcriptome during Host Infection Highlight Specific Gene Expression Profiling in Resistant Rice Plants
Source: Pathogens. 2020 Aug 8;9(8):644. doi: 10.3390/pathogens9080644 (PMC7460394; doi:10.3390/pathogens9080644)
Supplement: Supplementary file 1 [file pathogens-09-00644-s001.zip]

Archive with 8 entries (8 files):
- Figure S1.pdf
- Figure S2.pdf
- Table S1.pdf
- Table S2.xlsx
- Table S3.xlsx
- Table S4.xlsx
- Table S5.xlsx
- Table S6.xlsx
