# Supplementary material for: Analyses of the Root-Knot Nematode (Meloidogyne graminicola) Transcriptome during Host Infection Highlight Specific Gene Expression Profiling in Resistant Rice Plants
Source: Pathogens. 2020 Aug 8;9(8):644. doi: 10.3390/pathogens9080644 (PMC7460394; doi:10.3390/pathogens9080644)
Supplement: Supplementary file 1 [file pathogens-09-00644-s001.zip › Table S2.xlsx]

## Sheet: 2dpi vs J2 common
M. graminicola transcript	Length	SP & NLS prediction	Best blastn hit			Best blastx hit											LogFC (Nip2 versus J2)	FDR (Padj)	LogFC (Tog2 versus J2)	FDR (Padj)	normalised CPM value
				M. graminicola		M. incognita			C. elegans				Uniprot								pre-J2			in Nipponbare (S)							in TOG5681 (R )
			CDS	Fonction	e-value	Protein	Annotation	e-value	Protein	Class	Fonction	e-value	Protein	Species	Fonction	e-value					J2A	J2B		Nip2A	Nip2B	Nip4A	Nip4B	Nip8A	Nip8B		Tog2A	Tog2B	Tog4A	Tog4B	Tog8A	Tog8B
Mg48080	452																14.4111	3.90498e-09	13.7284	7.48418e-09	0.266188	0.314332		972.162	796.166	218.199	301.13	3.11589	4.1118		582.939	519.478	170.855	115.16	13.0117	8.63337
Mg73341	383					Minc3s02087g28191	IPR013126 Heat shock protein 70 family IPR018181 Heat shock protein 702C conserved site	1.15e-48	CE09682	hsp-1	Heat shock 70 kDa protein A	8e-43	Q1LVN8	Danio rerio	Selenoprotein O	8e-46	13.5549	0.000788516	11.9701	0.00199969	0.290005	0.266188		475.624	210.336	151.143	92.2952	40.3204	75.8965		61.3757	168.327	51.7137	132.891	30.3598	68.4587
Mg78324	224					Minc3s06127g39373	IPR000795 Transcription factor2C GTP-binding domain IPR004160 Translation elongation factor EFTu/EF1A2C C-terminal IPR004161 Translation elongation factor EFTu-like2C domain 2 IPR004539 Translation elongation factor EF1A2C eukaryotic/archaeal IPR009000 Translation protein2C beta-barrel domain superfamily IPR009001 Translation elongation factor EF1A/initiation factor IF2gamma2C C-terminal IPR02741…	3.47e-44	CE33154	eef-1A.2	Elongation factor 1-alpha	5e-44	P08736	Drosophila melanogaster	Elongation factor 1-alpha 1	4e-42	12.7976	0.00453755	10.915	0.0126822	0.266188	0.29026		317.956	86.0695	117.615	56.8994	60.9016	59.5527		21.5835	89.0787	23.9591	98.848	12.3036	40.4287
Mg7230	127																12.1131	8.82726e-05	7.39043	0.00732241	0.266188	0.266188		108.516	38.7297	1.19753	1.44605	0.424505	2.82993		1.68734	4.36523	0.266188	0.97541	0.62023	0.266188
Mg63154	574					Minc3s06127g39373	IPR000795 Transcription factor2C GTP-binding domain IPR004160 Translation elongation factor EFTu/EF1A2C C-terminal IPR004161 Translation elongation factor EFTu-like2C domain 2 IPR004539 Translation elongation factor EF1A2C eukaryotic/archaeal IPR009000 Translation protein2C beta-barrel domain superfamily IPR009001 Translation elongation factor EF1A/initiation factor IF2gamma2C C-terminal IPR02741…	4.97e-87	CE01270	eef-1A.1	Elongation factor 1-alpha	1e-86	Q41803	Zea mays	Elongation factor 1-alpha	2e-100	11.9744	0.0122054	10.8697	0.0238953	0.266188	0.266188		96.7498	35.771	75.7046	13.2446	16.2562	27.8264		14.4777	48.0883	15.1589	35.7273	62.2235	14.072
Mg62621	563																11.8546	0.000181247	13.8376	9.35175e-05	0.266188	0.266188		44.9781	80.152	21.687	27.4029	1.37441	3.79133		190.701	296.763	34.1132	44.9471	4.51469	16.1638
Mg70137	493		NXFT01000701.1.1669_g	IPR000626 Ubiquitin domain IPR019954 Ubiquitin conserved site IPR019956 Ubiquitin IPR029071 Ubiquitin-like domain superfamily	1.69e-38	Minc3s02189g28759	IPR000626 Ubiquitin domain IPR001975 Ribosomal protein L40e IPR019954 Ubiquitin conserved site IPR019956 Ubiquitin IPR029071 Ubiquitin-like domain superfamily IPR038587 Ribosomal protein L40e superfamily	1.28e-78	CE15495	ubq-2	Ubiquitin	3e-80	P18101	Drosophila melanogaster	Ubiquitin-60S ribosomal protein L40	1e-85	11.8181	0.00209643	10.1916	0.00546057	0.313822	0.338403		395.614	154.12	146.486	54.5397	27.8133	29.7492		64.218	115.039	42.9135	169.77	21.5087	64.6935
Mg77886	459					Minc3s02313g29397	IPR001585 Transaldolase/Fructose-6-phosphate aldolase IPR004730 Transaldolase type 1 IPR013785 Aldolase-type TIM barrel IPR018225 Transaldolase2C active site	1.16e-12					B3R1I4	Cupriavidus taiwanensis	Transaldolase	2e-19	11.3931	0.0013668	9.19017	0.00638337	0.266188	0.266188		70.8639	18.0186	41.2451	23.8634	2.79926	6.996		5.9508	13.9297	6.35865	7.3584	0.266188	5.2865
Mg53580	357		NXFT01000826.1.2063_g		7.81e-160												11.3627	1.67396e-05	10.4613	3.91159e-05	0.313822	0.266188		87.3367	127.492	11.4422	30.9425	0.582822	0.266188		59.9546	54.92	7.0356	10.1953	0.266188	1.93962
Mg63887	480					Minc3s02189g28759	IPR000626 Ubiquitin domain IPR001975 Ribosomal protein L40e IPR019954 Ubiquitin conserved site IPR019956 Ubiquitin IPR029071 Ubiquitin-like domain superfamily IPR038587 Ribosomal protein L40e superfamily	1.81e-78	CE15495	ubq-2	Ubiquitin	9e-79	P0C224	Neurospora crassa	Ubiquitin-60S ribosomal protein L40	4e-81	11.3074	0.0125073	9.96239	0.0272055	0.266188	0.266188		54.3911	29.8535	13.3049	42.7411	1.21609	4.1118		7.37195	26.2268	2.97395	21.5428	1.32831	14.4904
Mg64128	185																11.2941	0.000894015	9.6561	0.00309111	0.266188	0.266188		4.9727	80.152	3.0602	8.5252	1.37441	6.0346		24.4258	2.99888	3.65089	2.39385	3.09852	1.93962
Mg73018	594					Minc3s02147g28550	IPR000504 RNA recognition motif domain IPR012677 Nucleotide-binding alpha-beta plait domain superfamily IPR035979 RNA-binding domain superfamily	1.69e-31	CE29697			8e-29	P24733	Aequipecten	Myosin heavy chain, striated muscle	1e-33	11.2324	1.828e-06	6.98197	0.00266687	0.266188	0.266188		61.4509	18.0186	61.7345	47.4606	6.44055	4.43226		1.68734	2.99888	2.97395	7.3584	2.0364	4.03142
Mg42569	706		NXFT01002220.1.5906_g		0.0												11.1829	5.01106e-11	10.3983	1.10338e-10	0.504356	0.362475		421.499	435.2	144.624	179.605	4.54075	6.67554		274.549	222.981	127.531	85.3728	12.6577	14.4904
Mg61667	1050					Minc3s07360g41028	IPR002100 Transcription factor2C MADS-box IPR033896 MADS MEF2-like IPR036879 Transcription factor2C MADS-box superfamily	1.89e-14	CE25156	mef-2		2e-13	Q0J8G8	Oryza sativa	MADS-box transcription factor 26	1e-73	11.1737	1.37283e-07	10.1463	4.75074e-07	0.266188	0.266188		33.2118	44.6472	117.615	171.346	1.21609	3.79133		21.5835	16.6623	6.35865	8.77685	7.34703	3.61306
Mg79034	619					Minc3s02234g29007	IPR001732 UDP-glucose/GDP-mannose dehydrogenase2C N-terminal IPR008927 6-phosphogluconate dehydrogenase-like2C C-terminal domain superfamily IPR014026 UDP-glucose/GDP-mannose dehydrogenase2C dimerisation IPR014027 UDP-glucose/GDP-mannose dehydrogenase2C C-terminal IPR017476 UDP-glucose/GDP-mannose dehydrogenase IPR028356 UDP-glucose 6-dehydrogenase2C eukaryotic type IPR036220 UDP-glucose/GDP-mann…	1.08e-61	CE05767	sqv-4	UDP-glucose 6-dehydrogenase	1e-62	Q74MI6	Nanoarchaeum	Elongation factor 1-alpha	3e-77	11.1027	0.0187883	10.5893	0.0295106	0.266188	0.266188		23.7988	50.5647	3.0602	20.3238	1.05777	22.6989		15.8989	35.7912	5.68171	19.4152	6.2849	9.05173
Mg40980	242	SP															11.016	3.82938e-07	10.5306	6.89228e-07	0.456722	0.675405		696.831	612.724	115.752	213.821	2.16599	3.15039		483.458	452.527	118.731	67.6422	7.34703	11.5619
Mg69808	1307					Minc3s04174g35667	IPR002136 Ribosomal protein L4/L1e IPR013000 Ribosomal protein L4/L1e2C eukaryotic/archaeal2C conserved site IPR023574 Ribosomal protein L4 domain superfamily IPR025755 60S ribosomal protein L42C C-terminal domain	3.17e-136	CE07669	rpl-4	60S ribosomal protein L4	2e-112	P35679	Schizosaccharomyces pombe	60S ribosomal protein L4-A	4e-142	10.9617	0.0021491	9.09462	0.00992287	0.266188	0.266188		44.9781	20.9773	9.57957	38.0217	7.07382	25.2626		11.6354	7.09792	9.06642	42.8195	34.9623	50.4693
Mg61495	1964												Q9LI74	Arabidopsis thaliana	Protein CHUP1, chloroplastic	2e-39	10.9274	3.52112e-07	7.40057	0.000330074	0.266188	0.266188		21.4455	44.6472	46.8331	62.7987	19.1059	40.0041		4.52965	1.63253	1.62007	1.68463	7.70107	6.95993
Mg60461	328																10.8761	0.00244552	8.40291	0.0128296	0.266188	0.266188		59.0976	3.22492	16.0989	1.44605	0.424505	0.907123		8.7931	2.99888	3.65089	1.68463	0.266188	0.684547
Mg59276	237																10.7894	0.000481898	8.57377	0.00274714	0.266188	0.266188		49.6846	9.14239	6.78555	6.16548	1.53272	0.586656		10.2143	2.99888	2.97395	8.06763	0.974272	1.52127
Mg61537	469		NXFT01004073.1.10659_g	IPR007243 Atg6/Beclin IPR038274 Atg6/Beclin C-terminal domain superfamily IPR040455 Atg6 2C BARA domain IPR041691 Atg6/beclin 2C coiled-coil domain	0.0												10.7327	0.00174647	9.40751	0.00516426	0.266188	0.266188		49.6846	6.18366	47.7644	38.0217	0.582822	0.907123		21.5835	1.63253	16.5128	5.93996	0.266188	1.10291
Mg57167	665					Minc3s00960g19311	IPR004000 Actin family IPR004001 Actin2C conserved site IPR020902 Actin/actin-like conserved site	1.36e-151	CE13148	act-3	Actin-3	2e-149	P53506	Xenopus laevis	Actin, cytoplasmic type 8	5e-149	10.6594	0.0107448	9.71766	0.0206069	0.337639	0.266188		117.929	50.5647	78.4986	21.5037	10.3985	12.7644		18.7412	69.9499	13.805	64.0961	17.9683	83.5197
Mg43571	1229					Minc3s00967g19392	IPR000795 Transcription factor2C GTP-binding domain IPR004160 Translation elongation factor EFTu/EF1A2C C-terminal IPR004161 Translation elongation factor EFTu-like2C domain 2 IPR004539 Translation elongation factor EF1A2C eukaryotic/archaeal IPR009000 Translation protein2C beta-barrel domain superfamily IPR009001 Translation elongation factor EF1A/initiation factor IF2gamma2C C-terminal IPR02741…	8.06e-171	CE01270	eef-1A.1	Elongation factor 1-alpha	1e-167	P18624	Dictyostelium discoideum	Elongation factor 1-alpha	1e-180	10.5726	0.00124325	8.00689	0.00995188	0.313822	0.266188		103.81	18.0186	93.4	14.4245	8.34035	9.55974		7.37195	13.9297	21.9283	24.3797	8.05511	13.6537
Mg79853	380					Minc3s00927g18958	IPR016040 NAD(P)-binding domain IPR036291 NAD(P)-binding domain superfamily	8.02e-23	CE04302	sqv-1		1e-23	Q6DF08	Xenopus tropicalis	UDP-glucuronic acid decarboxylase 1	3e-22	10.5272	0.000730661	8.71369	0.00307987	0.266188	0.266188		28.5053	20.9773	2.12886	6.16548	1.05777	8.59834		7.37195	7.09792	2.97395	5.93996	1.32831	2.35798
Mg60386	477					Minc3s02676g31151	IPR002671 Ribosomal protein L22e IPR038526 Ribosomal protein L22e superfamily	7.77e-28	CE04102	rpl-22	60S ribosomal protein L22	1e-19	P47198	Rattus norvegicus	60S ribosomal protein L22	3e-21	10.4179	0.00348393	7.98516	0.0182953	0.266188	0.266188		4.9727	41.6885	3.0602	7.34534	0.266188	3.47086		5.9508	2.99888	7.0356	3.10307	12.3036	5.2865
Mg49150	652		NXFT01000171.1.4425_g	IPR001563 Peptidase S10 2C serine carboxypeptidase IPR018202 Serine carboxypeptidase 2C serine active site IPR029058 Alpha/Beta hydrolase fold IPR033124 Serine carboxypeptidases 2C histidine active site	0.0	Minc3s00485g13136	IPR001563 Peptidase S102C serine carboxypeptidase IPR018202 Serine carboxypeptidase2C serine active site IPR029058 Alpha/Beta hydrolase fold	5.53e-43	CE02733		Uncharacterized serine carboxypeptidase F41C3.5	6e-36	Q3AQC2	Chlorobium chlorochromatii	Adenosylhomocysteinase	1e-34	10.4163	1.22004e-06	11.6686	8.24451e-07	0.337639	0.362475		127.342	148.203	3.99154	13.2446	0.266188	0.266188		305.814	348.685	36.821	28.6351	1.68236	5.70486
Mg67822	1052					Minc3s02147g28550	IPR000504 RNA recognition motif domain IPR012677 Nucleotide-binding alpha-beta plait domain superfamily IPR035979 RNA-binding domain superfamily	1.06e-16	CE29697			2e-16	Q5R7E0	Pongo abelii	Peroxiredoxin-6	2e-17	10.3928	0.0237046	9.63106	0.0386259	0.266188	0.266188		21.4455	23.9361	37.5197	181.964	20.6891	43.5293		7.37195	19.395	3.65089	32.8904	16.1981	27.8779
Mg65592	394					Minc3s05425g38221	IPR001210 Ribosomal protein S17e IPR018273 Ribosomal protein S17e2C conserved site IPR036401 Ribosomal protein S17e-like superfamily	2.21e-41	CE26948	rps-17	40S ribosomal protein S17	2e-36	Q90YQ6	Ictalurus punctatus	ICTPU 40S ribosomal protein S17	8e-47	10.3749	0.00113334	8.96494	0.00367649	0.266188	0.266188		37.9183	6.18366	10.5109	14.4245	1.84936	2.82993		4.52965	12.5633	0.266188	3.10307	1.32831	3.61306
Mg62345	215																10.3358	0.0190339	8.58446	0.0482476	0.266188	0.266188		42.6248	0.266188	13.3049	1.44605	0.266188	0.266188		13.0566	0.266188	4.32783	0.97541	0.974272	1.52127
Mg71105	1362																10.2856	0.000228467	8.9673	0.000852655	0.266188	0.266188		23.7988	18.0186	6.78555	12.0648	2.79926	22.058		4.52965	12.5633	5.68171	20.1244	29.6517	27.4595
Mg72040	163												P42792	Arabidopsis thaliana	Cytochrome b	1e-17	10.2481	0.00983385	7.97903	0.0331042	0.266188	0.266188		2.61945	38.7297	1.19753	2.62591	0.582822	2.50946		4.52965	4.36523	1.62007	1.68463	1.32831	1.10291
Mg57835	385																10.21	1.19967e-07	10.8828	7.28634e-08	0.266188	0.314332		37.9183	59.4409	11.4422	8.5252	4.38243	2.82993		78.4296	75.4152	33.4363	20.1244	4.51469	8.63337
Mg64779	156					Minc3s03764g34736	IPR000217 Tubulin IPR002452 Alpha tubulin IPR003008 Tubulin/FtsZ2C GTPase domain IPR008280 Tubulin/FtsZ2C C-terminal IPR017975 Tubulin2C conserved site IPR018316 Tubulin/FtsZ2C 2-layer sandwich domain IPR023123 Tubulin2C C-terminal IPR036525 Tubulin/FtsZ2C GTPase domain superfamily IPR037103 Tubulin/FtsZ2C C-terminal domain superfamily	4.95e-30	CE24843	mec-12	Detyrosinated tubulin alpha-3 chain	2e-29	P33625	Euglena gracilis	EUGGR Tubulin alpha chain	2e-32	10.1891	0.00133491	8.9684	0.00376894	0.266188	0.266188		35.5651	3.22492	7.71689	4.98562	1.05777	0.907123		5.9508	11.197	1.62007	4.52152	2.0364	4.44978
Mg49759	1226					Minc3s00578g14540	IPR000795 Transcription factor2C GTP-binding domain IPR004160 Translation elongation factor EFTu/EF1A2C C-terminal IPR004161 Translation elongation factor EFTu-like2C domain 2 IPR004539 Translation elongation factor EF1A2C eukaryotic/archaeal IPR009000 Translation protein2C beta-barrel domain superfamily IPR009001 Translation elongation factor EF1A/initiation factor IF2gamma2C C-terminal IPR02741…	0.0	CE01270	eef-1A.1	Elongation factor 1-alpha	0.0	P17786	Solanum lycopersicum	SOLLC Elongation factor 1-alpha	0.0	10.1715	0.0270013	11.7804	0.023243	0.504356	0.266188		230.885	80.152	23.5496	27.4029	8.65699	24.6217		503.354	455.26	485.633	558.424	26.1113	658.763
Mg77029	183					Minc3s02531g30496	IPR000558 Histone H2B IPR007125 Histone H2A/H2B/H3 IPR009072 Histone-fold	2.86e-12					Q9SI96	Arabidopsis thaliana	Histone H2B.3	5e-13	10.1436	0.000330357	8.05798	0.00217055	0.266188	0.29026		49.6846	15.0599	19.8243	6.16548	0.899456	1.54806		4.52965	11.197	0.943129	4.52152	1.32831	3.1947
Mg58707	456					Minc3s00322g10180	IPR000196 Ribosomal protein L19/L19e IPR015972 Ribosomal protein L19/L19e2C domain 1 IPR023638 Ribosomal protein L19/L19e conserved site IPR033935 Ribosomal protein L192C eukaryotic IPR035970 Ribosomal protein L19/L19e superfamily IPR039547 60S ribosomal protein L19	3.83e-56	CE08034	rpl-19	60S ribosomal protein L19	5e-44	P0DJ60	Tetrahymena thermophila	60S ribosomal protein L19	4e-55	10.065	0.00404484	8.18062	0.0156509	0.266188	0.266188		23.7988	12.1011	5.85422	22.6835	0.266188	1.54806		0.266188	9.83061	2.97395	3.8123	5.22278	3.61306
Mg43766	932		NXFT01001487.1.3888_g		0.0												10.0371	0.000355491	8.74432	0.00096451	0.599623	0.29026		219.119	192.584	28.2063	69.8779	0.582822	1.54806		108.274	60.3854	18.5436	16.5783	3.80661	1.52127
Mg64610	797					Minc3s00668g15870	IPR001662 Elongation factor 1B gamma2C C-terminal IPR004045 Glutathione S-transferase2C N-terminal IPR004046 Glutathione S-transferase2C C-terminal IPR036249 Thioredoxin-like superfamily IPR036282 Glutathione S-transferase2C C-terminal domain superfamily IPR036433 Elongation factor EF1B gamma2C C-terminal domain superfamily	1.54e-23	CE32385	eef-1G	Probable elongation factor 1-gamma	5e-24	P40921	Schizosaccharomyces pombe	Elongation factor 1-gamma	6e-28	9.98884	0.00138967	7.39681	0.0118775	0.266188	0.266188		4.9727	29.8535	7.71689	10.8849	0.582822	3.15039		3.10849	2.99888	2.97395	2.39385	13.7198	4.44978
Mg72043	868					Minc3s00064g03235	IPR000308 14-3-3 protein IPR023409 14-3-3 protein2C conserved site IPR023410 14-3-3 domain IPR036815 14-3-3 domain superfamily	7.91e-151	CE03389	ftt-2	14-3-3-like protein 2	3e-148	Q2F637	Bombyx mori	BOMMO 14-3-3 protein zeta	1e-149	9.91265	0.00504569	9.37692	0.00905325	0.266188	0.266188		28.5053	3.22492	12.3736	4.98562	4.38243	27.8264		4.52965	18.0287	2.29701	9.48607	1.68236	12.3986
Mg62710	331																9.88873	0.0088961	7.71301	0.0324869	0.266188	0.266188		2.61945	29.8535	1.19753	6.16548	0.582822	2.82993		3.10849	4.36523	1.62007	2.39385	8.7632	1.93962
Mg41668	1645					Minc3s01886g26965	IPR000217 Tubulin IPR002452 Alpha tubulin IPR003008 Tubulin/FtsZ2C GTPase domain IPR008280 Tubulin/FtsZ2C C-terminal IPR017975 Tubulin2C conserved site IPR018316 Tubulin/FtsZ2C 2-layer sandwich domain IPR023123 Tubulin2C C-terminal IPR036525 Tubulin/FtsZ2C GTPase domain superfamily IPR037103 Tubulin/FtsZ2C C-terminal domain superfamily	0.0	CE24843	mec-12	Detyrosinated tubulin alpha-3 chain	0.0	P68373	Mus musculus	Tubulin alpha-1C chain	0.0	9.86712	0.00991082	9.28384	0.0165698	0.337639	0.29026		61.4509	59.4409	67.3225	419.116	57.102	126.851		24.4258	56.2864	6.35865	35.7273	40.627	60.9283
Mg48935	445		NXFT01000603.1.1402_g	IPR001563 Peptidase S10 2C serine carboxypeptidase IPR001604 DNA/RNA non-specific endonuclease IPR018202 Serine carboxypeptidase 2C serine active site IPR020821 Extracellular Endonuclease 2C subunit A IPR029058 Alpha/Beta hydrolase fold IPR033124 Serine carboxypeptidases 2C histidine active site	2.82e-140	Minc3s01300g22598	IPR001563 Peptidase S102C serine carboxypeptidase IPR029058 Alpha/Beta hydrolase fold	9.56e-46	CE02733		Uncharacterized serine carboxypeptidase F41C3.5	5e-32	Q9M2F1	Arabidopsis thaliana	40S ribosomal protein S27-2	7e-31	9.86391	0.00124325	9.11964	0.00279124	0.337639	0.266188		19.0923	80.152	2.12886	4.98562	0.266188	0.266188		24.4258	34.4248	2.29701	3.10307	0.266188	3.61306
Mg57501	112																9.85426	0.00501382	8.54889	0.013177	0.266188	0.266188		19.0923	12.1011	4.92288	4.98562	0.582822	2.18899		3.10849	9.83061	0.943129	1.68463	1.68236	1.52127
Mg70444	706					Minc3s07922g41697	IPR002130 Cyclophilin-type peptidyl-prolyl cis-trans isomerase domain IPR020892 Cyclophilin-type peptidyl-prolyl cis-trans isomerase2C conserved site IPR024936 Cyclophilin-type peptidyl-prolyl cis-trans isomerase IPR029000 Cyclophilin-like domain superfamily	6.55e-87	CE22213	cyn-1	Peptidyl-prolyl cis-trans isomerase 1	3e-71	Q9LT77	Arabidopsis thaliana	Probable cysteine proteinase At3g19400	1e-72	9.84989	8.17897e-05	8.55721	0.000449232	0.266188	0.266188		21.4455	9.14239	11.4422	7.34534	6.9155	35.1971		4.52965	8.46427	8.38948	25.0889	45.2295	34.5716
Mg36244	1525					Minc3s00960g19311	IPR004000 Actin family IPR004001 Actin2C conserved site IPR020902 Actin/actin-like conserved site	2.05e-163	CE13148	act-3	Actin-3	4e-162	P02578	Acanthamoeba castellanii	ACACA Actin-1	2e-162	9.84185	0.013901	8.67063	0.0287314	0.62344	0.338403		303.836	118.616	1027.53	1793.65	246.132	1163.88		77.0084	112.307	285.258	869.772	94.0873	521.542
Mg60895	1015								CE31076	inos-1		7e-153	Q54N49	Dictyostelium discoideum	Inositol-3-phosphate synthase	3e-172	9.82744	0.00367113	7.98329	0.0205514	0.266188	0.266188		23.7988	6.18366	17.0303	56.8994	3.11589	17.8919		5.9508	2.99888	9.74336	20.1244	0.974272	8.21501
Mg20857	1091		NXFT01003177.1.8279_g	IPR003656 Zinc finger 2C BED-type	0.0												9.77776	6.5663e-06	9.37206	1.20949e-05	1.21886	0.940193		572.108	887.886	310.402	520.584	11.1901	19.8147		649.733	451.161	333.321	188.21	38.1487	37.0818
Mg32900	918		NXFT01003555.1.9288_g		0.0												9.71092	7.65482e-05	8.52101	0.000215996	0.599623	0.386546		219.119	189.625	55.2151	73.4175	2.16599	2.18899		113.958	65.8508	52.3906	13.0322	5.93086	2.77634
Mg68883	576					Minc3s02447g30087	IPR000218 Ribosomal protein L14P IPR019972 Ribosomal protein L14P2C conserved site IPR036853 Ribosomal protein L14 superfamily	6.70e-73	CE00778	rpl-23	60S ribosomal protein L23	9e-73	Q5REU2	Pongo abelii	60S ribosomal protein L23	1e-76	9.70504	0.00339113	10.3416	0.00219976	0.266188	0.266188		23.7988	3.22492	19.8243	22.6835	5.80728	38.7223		20.1623	23.4941	10.4203	20.8336	60.0993	36.2451
Mg72450	1719																9.6489	0.0175755	9.19572	0.0236433	0.266188	0.266188		9.67922	18.0186	10.5109	25.0432	4.85738	46.4135		8.7931	11.197	5.00477	32.8904	40.981	38.3369
Mg62738	346					Minc3s00014g00912	IPR001780 Ribosomal protein L35A IPR009000 Translation protein2C beta-barrel domain superfamily IPR038661 Ribosomal protein L35A superfamily	1.21e-27	CE04362	rpl-33	60S ribosomal protein L35a	3e-21	P0DJ22	Tetrahymena thermophila	60S ribosomal protein L35a	7e-29	9.63856	0.00437684	7.99206	0.0152228	0.266188	0.266188		12.0325	15.0599	6.78555	10.8849	0.266188	3.15039		7.37195	1.63253	9.06642	8.06763	2.74448	3.1947
Mg68475	830					Minc3s02938g32136	IPR000217 Tubulin IPR002452 Alpha tubulin IPR003008 Tubulin/FtsZ2C GTPase domain IPR008280 Tubulin/FtsZ2C C-terminal IPR017975 Tubulin2C conserved site IPR018316 Tubulin/FtsZ2C 2-layer sandwich domain IPR023123 Tubulin2C C-terminal IPR036525 Tubulin/FtsZ2C GTPase domain superfamily IPR037103 Tubulin/FtsZ2C C-terminal domain superfamily	5.27e-142	CE24843	mec-12	Detyrosinated tubulin alpha-3 chain	2e-139	P09205	Chlamydomonas reinhardtii	CHLRE Tubulin alpha-2 chain	1e-154	9.63274	0.00100531	9.84058	0.000756799	0.266188	0.266188		12.0325	15.0599	16.0989	16.7842	5.49065	44.4907		8.7931	22.1277	13.805	27.9258	36.7325	36.2451
Mg79741	578					Minc3s04588g36606	IPR000509 Ribosomal protein L36e IPR038097 Ribosomal protein L36e domain superfamily	4.19e-17	CE30781	rpl-36	60S ribosomal protein L36	1e-20	O80929	Arabidopsis thaliana	60S ribosomal protein L36-1	1e-25	9.5939	0.000220187	7.96941	0.00172496	0.266188	0.266188		16.739	9.14239	14.2363	6.16548	2.48263	20.7761		1.68734	7.09792	10.4203	13.7414	21.8628	23.6943
Mg42498	661	SP	NXFT01000171.1.4425_g	IPR001563 Peptidase S10 2C serine carboxypeptidase IPR018202 Serine carboxypeptidase 2C serine active site IPR029058 Alpha/Beta hydrolase fold IPR033124 Serine carboxypeptidases 2C histidine active site	0.0	Minc3s00485g13126	IPR001563 Peptidase S102C serine carboxypeptidase IPR018202 Serine carboxypeptidase2C serine active site IPR029058 Alpha/Beta hydrolase fold	5.95e-97	CE02733		Uncharacterized serine carboxypeptidase F41C3.5	7e-68	Q95Y90	Caenorhabditis elegans	60S ribosomal protein L9	1e-66	9.59144	7.40286e-08	10.1808	5.12191e-08	0.409089	0.314332		56.7444	118.616	2.12886	2.62591	0.582822	0.586656		96.9046	164.228	10.4203	13.0322	0.266188	1.10291
Mg66599	1031					Minc3s00064g03235	IPR000308 14-3-3 protein IPR023409 14-3-3 protein2C conserved site IPR023410 14-3-3 domain IPR036815 14-3-3 domain superfamily	7.05e-85	CE03389	ftt-2	14-3-3-like protein 2	4e-82	P93259	Mesembryanthemum crystallinum	MESCR 14-3-3-like protein	5e-88	9.55814	0.000536377	7.71007	0.00694421	0.266188	0.266188		21.4455	3.22492	5.85422	20.3238	6.12392	21.7375		1.68734	5.73157	9.06642	27.9258	34.6083	22.8576
Mg67745	894												P09042	Nicotiana tabacum	TOBAC Pathogenesis-related protein 1C	4e-27	9.49795	0.000764349	6.98039	0.0139777	0.266188	0.266188		9.67922	15.0599	11.4422	3.80577	1.53272	14.0463		1.68734	2.99888	5.68171	13.7414	13.7198	8.63337
Mg62965	1690					Minc3s02350g29607	IPR005788 Disulphide isomerase IPR005792 Protein disulphide isomerase IPR013766 Thioredoxin domain IPR017937 Thioredoxin2C conserved site IPR036249 Thioredoxin-like superfamily	3.42e-84	CE11570	pdi-3	Protein disulfide-isomerase	5e-78	P55059	Humicola insolens	HUMIN Protein disulfide-isomerase	6e-123	9.49078	0.00425244	7.71069	0.0302759	0.266188	0.266188		9.67922	15.0599	7.71689	6.16548	3.90748	44.4907		1.68734	5.73157	6.35865	23.6705	40.981	42.1021
Mg70517	834					Minc3s00471g12892	IPR000851 Ribosomal protein S5 IPR005324 Ribosomal protein S52C C-terminal IPR005711 Ribosomal protein S52C eukaryotic/archaeal IPR013810 Ribosomal protein S52C N-terminal IPR014721 Ribosomal protein S5 domain 2-type fold2C subgroup IPR018192 Ribosomal protein S52C N-terminal2C conserved site IPR020568 Ribosomal protein S5 domain 2-type fold	1.55e-94	CE04237	rps-2	40S ribosomal protein S2	5e-99	Q90YS3	Ictalurus punctatus	ICTPU 40S ribosomal protein S2	1e-109	9.47206	0.0113262	8.84363	0.0183658	0.266188	0.266188		12.0325	12.1011	2.12886	21.5037	5.49065	39.6837		4.52965	11.197	8.38948	24.3797	43.4593	28.2962
Mg52086	743		NXFT01001758.1.4529_g		1.45e-80	Minc3s00331g10356		2.14e-13									9.46854	0.000310931	6.25541	0.00845829	0.361455	0.266188		61.4509	29.8535	24.481	9.70506	0.424505	0.266188		7.37195	2.99888	1.62007	3.10307	0.974272	0.266188
Mg68042	998					Minc3s00113g04969	IPR009071 High mobility group box domain IPR036910 High mobility group box domain superfamily	9.68e-19	CE28234	hmg-1.2	High mobility group protein 1.2	9e-11	Q69CJ9	Ophiophagus	OPHHA 60S ribosomal protein L35	1e-13	9.45513	0.000648773	7.7187	0.00840654	0.266188	0.266188		14.3857	9.14239	12.3736	16.7842	6.59887	43.8498		4.52965	2.99888	9.06642	26.5074	58.3291	43.7755
Mg70098	536					Minc3s00014g00894	IPR001971 Ribosomal protein S11 IPR018102 Ribosomal S112C conserved site IPR036967 Ribosomal protein S11 superfamily	1.52e-67	CE00821	rps-14	40S ribosomal protein S14	2e-70	P46295	Chlamydomonas reinhardtii	CHLRE 40S ribosomal protein S14	3e-73	9.43705	0.00399103	8.71354	0.00759774	0.266188	0.266188		16.739	6.18366	3.0602	20.3238	5.0157	34.8767		7.37195	7.09792	20.5744	26.5074	50.8942	35.8267
Mg62321	679					Minc3s02357g29645	IPR001564 Nucleoside diphosphate kinase IPR023005 Nucleoside diphosphate kinase2C active site IPR034907 Nucleoside diphosphate kinase-like domain IPR036850 Nucleoside diphosphate kinase-like domain superfamily	1.47e-62	CE09650	ndk-1	Nucleoside diphosphate kinase	7e-52	Q8DM56	Thermosynechococcus	THEEB Nucleoside diphosphate kinase	8e-60	9.42894	0.000309695	6.98749	0.015005	0.266188	0.266188		16.739	6.18366	29.1377	32.1224	15.3063	22.6989		3.10849	1.63253	9.74336	4.52152	1.32831	16.5822
Mg62517	586					Minc3s00014g00894	IPR001971 Ribosomal protein S11 IPR018102 Ribosomal S112C conserved site IPR036967 Ribosomal protein S11 superfamily	1.13e-57	CE00821	rps-14	40S ribosomal protein S14	3e-65	P62264	Mus musculus	40S ribosomal protein S14	1e-64	9.40108	0.0268538	8.70488	0.0436777	0.266188	0.266188		21.4455	0.266188	22.6183	88.7556	7.8654	26.5445		3.10849	11.197	13.805	21.5428	3.09852	14.9088
Mg64299	178																9.38888	0.0168786	9.39051	0.0220861	0.266188	0.266188		19.0923	3.22492	0.266188	3.80577	0.266188	0.266188		11.6354	11.197	15.8358	10.9045	0.266188	12.817
Mg66228	388					Minc3s05759g38791	IPR002171 Ribosomal protein L2 IPR008991 Translation protein SH3-like domain superfamily IPR012340 Nucleic acid-binding2C OB-fold IPR014722 Ribosomal protein L22C domain 2 IPR014726 Ribosomal protein L22C domain 3 IPR022666 Ribosomal Proteins L22C RNA binding domain IPR022669 Ribosomal protein L22C C-terminal IPR022671 Ribosomal protein L22C conserved site IPR023672 Ribosomal protein L22C archaea…	5.25e-36	CE18478	rpl-2	60S ribosomal protein L8	9e-30	Q9U9L2	Anopheles gambiae	ANOGA 60S ribosomal protein L8	2e-33	9.38299	0.00447664	7.71323	0.015946	0.266188	0.266188		19.0923	3.22492	22.6183	1.44605	1.69104	1.22759		3.10849	4.36523	2.29701	5.93996	2.39044	3.61306
Mg66419	2583					Minc3s04772g36976	IPR001404 Heat shock protein Hsp90 family IPR003594 Histidine kinase/HSP90-like ATPase IPR019805 Heat shock protein Hsp902C conserved site IPR020568 Ribosomal protein S5 domain 2-type fold IPR020575 Heat shock protein Hsp902C N-terminal IPR036890 Histidine kinase/HSP90-like ATPase superfamily IPR037196 HSP902C C-terminal domain	0.0	CE05441	hsp-90	Heat shock protein 90	0.0	P04809	Drosophila pseudoobscura	DROPS Heat shock protein 83	0.0	9.37467	0.0135707	8.95113	0.0182858	0.313822	0.266188		37.9183	15.0599	55.2151	278.713	28.7632	82.6263		7.37195	33.0585	7.71254	16.5783	38.5027	32.0615
Mg63910	434					Minc3s00187g07099	IPR002119 Histone H2A IPR007125 Histone H2A/H2B/H3 IPR009072 Histone-fold IPR032454 Histone H2A2C C-terminal domain IPR032458 Histone H2A conserved site	5.03e-59	CE07426	htz-1	Histone H2A.V	6e-56	Q5ZMD6	Gallus gallus	Histone H2A.Z	1e-58	9.37037	0.00132871	8.69724	0.00287	0.266188	0.266188		4.9727	18.0186	11.4422	23.8634	1.21609	0.907123		1.68734	12.5633	7.0356	18.7059	0.974272	6.95993
Mg52892	329					Minc3s00408g11806	IPR000509 Ribosomal protein L36e IPR038097 Ribosomal protein L36e domain superfamily	1.46e-12	CE30781	rpl-36	60S ribosomal protein L36	2e-20	Q24F59	Tetrahymena thermophila	60S ribosomal protein L36	7e-25	9.33662	0.00129244	6.09806	0.032764	0.313822	0.266188		40.2716	12.1011	11.4422	14.4245	0.582822	3.47086		0.266188	5.73157	6.35865	8.77685	4.51469	6.12322
Mg53136	146					Minc3s00696g16207	IPR000626 Ubiquitin domain IPR006846 Ribosomal protein S30 IPR019954 Ubiquitin conserved site IPR019956 Ubiquitin IPR029071 Ubiquitin-like domain superfamily	1.14e-25	CE15495	ubq-2	Ubiquitin	2e-24	P49633	Acanthamoeba castellanii	ACACA Ubiquitin-60S ribosomal protein L40	1e-24	9.32824	6.11806e-05	8.04613	0.000270878	0.337639	0.266188		52.0379	15.0599	13.3049	10.8849	2.95758	11.4825		8.7931	19.395	7.71254	13.0322	9.47128	10.7252
Mg62862	208					Minc3s00884g18478	IPR000702 Ribosomal protein L6 IPR002359 Ribosomal protein L62C conserved site-2 IPR020040 Ribosomal protein L62C alpha-beta domain IPR036789 Ribosomal protein L62C alpha-beta domain superfamily	1.14e-13	CE01380	rpl-9	60S ribosomal protein L9	3e-13	P49210	Oryza sativa	60S ribosomal protein L9	3e-20	9.31455	0.0023387	10.0751	0.00198732	0.266188	0.266188		9.67922	12.1011	0.266188	0.266188	0.266188	0.266188		7.37195	28.9595	19.8975	20.1244	0.974272	14.4904
Mg66568	559					Minc3s02447g30087	IPR000218 Ribosomal protein L14P IPR019972 Ribosomal protein L14P2C conserved site IPR036853 Ribosomal protein L14 superfamily	7.65e-83	CE00778	rpl-23	60S ribosomal protein L23	1e-71	P48158	Caenorhabditis elegans	60S ribosomal protein L23	2e-70	9.29104	0.000224852	8.19855	0.000942748	0.266188	0.266188		12.0325	9.14239	14.2363	95.8348	13.8814	26.5445		4.52965	5.73157	1.62007	0.266188	10.5334	9.88845
Mg51370	573					Minc3s01526g24494	IPR002048 EF-hand domain IPR011992 EF-hand domain pair IPR018247 EF-Hand 12C calcium-binding site IPR039030 Calmodulin	2.04e-22	CE13902	cmd-1	Calmodulin	8e-22	Q94726	Paramecium tetraurelia	PARTE Caltractin ICL1d	1e-42	9.28642	0.000476747	8.67724	0.00098995	0.313822	0.266188		4.9727	47.6059	20.7556	30.9425	1.21609	4.75273		7.37195	26.2268	18.5436	20.1244	14.7819	11.9802
Mg47108	1900					Minc3s00578g14540	IPR000795 Transcription factor2C GTP-binding domain IPR004160 Translation elongation factor EFTu/EF1A2C C-terminal IPR004161 Translation elongation factor EFTu-like2C domain 2 IPR004539 Translation elongation factor EF1A2C eukaryotic/archaeal IPR009000 Translation protein2C beta-barrel domain superfamily IPR009001 Translation elongation factor EF1A/initiation factor IF2gamma2C C-terminal IPR02741…	0.0	CE01270	eef-1A.1	Elongation factor 1-alpha	0.0	Q92005	Danio rerio	Elongation factor 1-alpha	0.0	9.2835	0.0282407	8.87708	0.0387779	0.361455	0.29026		21.4455	77.1933	108.301	810.829	84.8075	270.1		13.0566	59.0191	4.32783	15.8691	62.5776	104.438
Mg63115	401					Minc3s00082g03963	IPR003213 Cytochrome c oxidase2C subunit VIb IPR036549 Cytochrome c oxidase2C subunit VIb superfamily	4.20e-14					Q01519	Saccharomyces cerevisiae	Cytochrome c oxidase subunit 6B	6e-16	9.25307	0.00305673	6.3928	0.0427375	0.266188	0.266188		14.3857	6.18366	8.64823	13.2446	4.22411	5.0732		0.266188	2.99888	4.32783	6.64918	0.974272	6.12322
Mg62179	592																9.18817	0.0114434	7.37946	0.0412751	0.266188	0.266188		19.0923	0.266188	25.4123	1.44605	1.05777	0.907123		0.266188	5.73157	2.97395	5.23074	4.86873	5.70486
Mg51610	896	SP															9.17758	0.00336386	7.27215	0.0220861	0.313822	0.266188		42.6248	3.22492	82.2239	9.70506	8.34035	6.35507		4.52965	8.46427	16.5128	20.1244	14.7819	24.9494
Mg67967	828					Minc3s00131g05590	IPR000911 Ribosomal protein L11/L12 IPR020783 Ribosomal protein L112C C-terminal IPR020784 Ribosomal protein L112C N-terminal IPR020785 Ribosomal protein L112C conserved site IPR036769 Ribosomal protein L112C C-terminal domain superfamily IPR036796 Ribosomal protein L11/L122C N-terminal domain superfamily	4.43e-68	CE17986	rpl-12	60S ribosomal protein L12	2e-64	P50883	Arabidopsis thaliana	60S ribosomal protein L12-1	2e-66	9.17416	0.00404088	8.77313	0.00557467	0.290005	0.266188		26.152	6.18366	12.3736	40.3814	7.54877	45.1316		8.7931	16.6623	24.6361	25.7982	73.9069	47.9591
Mg62249	1295																9.10728	0.0183986	7.96948	0.0451657	0.266188	0.266188		9.67922	9.14239	0.266188	16.7842	3.59084	26.224		1.68734	7.09792	7.0356	17.2875	31.0678	18.2556
Mg61817	376																9.09593	0.000112126	8.48377	0.000255723	0.313822	0.266188		23.7988	20.9773	6.78555	28.5828	0.582822	0.266188		5.9508	23.4941	17.8666	18.7059	4.86873	4.86814
Mg70405	1234																9.08886	0.0131922	8.19221	0.0271265	0.266188	0.266188		12.0325	6.18366	5.85422	6.16548	5.80728	55.0661		1.68734	8.46427	13.805	40.6918	37.0866	48.7958
Mg35045	1119		NXFT01001030.1.2691_g	IPR001547 Glycoside hydrolase 2C family 5 IPR017853 Glycoside hydrolase superfamily	0.0	Minc3s00202g07474	IPR001547 Glycoside hydrolase2C family 5 IPR017853 Glycoside hydrolase superfamily IPR018087 Glycoside hydrolase2C family 52C conserved site	2.03e-94					P06565	Bacillus sp. (strain	BACS4 Endoglucanase B	1e-40	9.08141	1.42903e-06	8.18493	3.92252e-06	0.861608	0.627262		299.13	236.965	91.5373	100.554	5.64897	8.59834		217.703	71.3162	72.0219	64.8054	15.844	12.817
Mg64374	1715					Minc3s00859g18172	IPR000225 Armadillo IPR002652 Importin-alpha2C importin-beta-binding domain IPR011989 Armadillo-like helical IPR016024 Armadillo-type fold IPR024931 Importin subunit alpha IPR032413 Atypical Arm repeat IPR036975 Importin-alpha2C importin-beta-binding domain superfamily	1.83e-141	CE20745	ima-3	Importin subunit alpha-3	5e-128	Q71VM4	Oryza sativa	Importin subunit alpha-1a	0.0	9.05741	0.00494469	7.71443	0.0207728	0.266188	0.266188		14.3857	3.22492	10.5109	23.8634	20.5308	28.7878		3.10849	4.36523	11.0972	14.4506	0.62023	18.2556
Mg58764	549					Minc3s02939g32142	IPR001196 Ribosomal protein L152C conserved site IPR021131 Ribosomal protein L18e/L15P IPR030878 Ribosomal protein L15 IPR036227 Ribosomal L18e/L15P superfamily	2.07e-72	CE26774			2e-63	P49637	Arabidopsis thaliana	60S ribosomal protein L27a-3	2e-68	9.05674	0.00148866	6.93297	0.0141325	0.290005	0.266188		21.4455	9.14239	44.9704	4.98562	2.00768	0.266188		3.10849	4.36523	3.65089	4.52152	5.22278	6.12322
Mg36010	1067																9.05057	0.000282359	8.34796	0.000589216	0.313822	0.266188		14.3857	29.8535	15.1676	49.8203	2.00768	8.91881		10.2143	16.6623	34.1132	44.9471	36.3785	20.7658
Mg47568	598												Q58A42	Dictyostelium discoideum	Protein DD3-3	1e-72	9.03148	0.00212559	7.99084	0.0060556	0.313822	0.266188		4.9727	38.7297	7.71689	12.0648	0.582822	0.586656		0.266188	20.7614	13.805	9.48607	5.22278	6.95993
Mg64260	252					Minc3s01055g20261	IPR000196 Ribosomal protein L19/L19e IPR015972 Ribosomal protein L19/L19e2C domain 1 IPR023638 Ribosomal protein L19/L19e conserved site IPR033935 Ribosomal protein L192C eukaryotic IPR035970 Ribosomal protein L19/L19e superfamily IPR039547 60S ribosomal protein L19	5.93e-19	CE08034	rpl-19	60S ribosomal protein L19	2e-13	P0DJ60	Tetrahymena thermophila	60S ribosomal protein L19	1e-17	9.02755	0.014284	8.19075	0.0276978	0.266188	0.266188		14.3857	3.22492	1.19753	10.8849	0.424505	1.22759		3.10849	7.09792	3.65089	3.8123	1.68236	2.35798
Mg65157	378					Minc3s00152g06205	IPR000589 Ribosomal protein S15 IPR009068 S15/NS12C RNA-binding IPR012606 Ribosomal protein S13/S152C N-terminal IPR023029 Ribosomal protein S15P	7.16e-46	CE04009	rps-13	40S ribosomal protein S13	9e-45	P59223	Arabidopsis thaliana	40S ribosomal protein S13-1	5e-48	8.94688	0.0276915	8.19727	0.0478217	0.266188	0.266188		4.9727	12.1011	11.4422	2.62591	0.266188	0.586656		4.52965	5.73157	0.266188	3.10307	1.32831	1.93962
Mg34865	1127					Minc3s00471g12892	IPR000851 Ribosomal protein S5 IPR005324 Ribosomal protein S52C C-terminal IPR005711 Ribosomal protein S52C eukaryotic/archaeal IPR013810 Ribosomal protein S52C N-terminal IPR014721 Ribosomal protein S5 domain 2-type fold2C subgroup IPR018192 Ribosomal protein S52C N-terminal2C conserved site IPR020568 Ribosomal protein S5 domain 2-type fold	2.25e-107	CE04237	rps-2	40S ribosomal protein S2	5e-119	P27952	Rattus norvegicus	40S ribosomal protein S2	5e-122	8.94321	0.00616755	7.42543	0.0235103	0.361455	0.266188		28.5053	35.771	34.7257	152.468	16.4145	37.4404		3.10849	19.395	2.97395	11.6137	12.3036	15.7455
Mg72544	739																8.9374	0.00139213	6.40524	0.0262432	0.266188	0.266188		4.9727	12.1011	1.19753	2.62591	2.32431	11.1621		1.68734	1.63253	2.97395	8.06763	16.5521	11.9802
Mg12322	500	SP															8.92547	1.63687e-05	8.00075	4.11563e-05	0.790157	0.482833		153.228	225.13	67.3225	41.5613	1.21609	4.1118		115.38	83.6133	42.2365	24.3797	8.7632	5.2865
Mg47530	369					Minc3s10849g44413	IPR002119 Histone H2A IPR007125 Histone H2A/H2B/H3 IPR009072 Histone-fold IPR032454 Histone H2A2C C-terminal domain IPR032458 Histone H2A conserved site	9.40e-53	CE05477	his-35	Histone H2A	1e-30	P35064	Tetrahymena thermophila	TETTH Histone H2A.X	4e-35	8.92508	0.000442894	8.55633	0.000739354	0.409089	0.266188		47.3314	38.7297	36.5884	95.8348	2.64094	2.82993		20.1623	46.722	26.6669	54.8763	20.4466	9.47009
Mg71086	899																8.9136	0.0165788	8.38361	0.0193259	0.266188	0.266188		4.9727	12.1011	5.85422	13.2446	7.39045	48.9772		1.68734	9.83061	13.805	37.1457	55.4967	55.0712
Mg64487	542												P20136	Gallus gallus	Glutathione S-transferase 2	2e-16	8.86493	0.00196184	10.0425	0.00114962	0.266188	0.266188		9.67922	6.18366	6.78555	13.2446	3.11589	0.266188		24.4258	11.197	7.0356	10.1953	4.86873	3.1947
Mg62661	329																8.77472	0.00971913	8.69945	0.0140539	0.266188	0.266188		14.3857	0.266188	3.99154	4.98562	0.899456	0.586656		3.10849	11.197	8.38948	4.52152	3.09852	3.61306
Mg19701	760		NXFT01000873.1.2189_g		0.0												8.72945	4.09259e-10	7.59888	1.60038e-09	1.00451	0.964264		287.364	337.562	56.1465	76.957	2.79926	2.50946		162.278	123.237	46.9751	22.2521	8.40915	8.63337
Mg66121	349					Minc3s03644g34399	IPR005680 Ribosomal protein S232C eukaryotic/archaeal IPR006032 Ribosomal protein S12/S23 IPR012340 Nucleic acid-binding2C OB-fold	6.59e-55	CE05747	rps-23	40S ribosomal protein S23	6e-53	Q9M5Z9	Euphorbia esula	EUPES 40S ribosomal protein S23	8e-53	8.66289	0.0236026	7.97901	0.0405412	0.266188	0.266188		4.9727	9.14239	22.6183	0.266188	1.21609	0.266188		4.52965	4.36523	2.29701	5.23074	1.68236	2.35798
Mg53341	469					Minc3s00285g09403	IPR001147 Ribosomal protein L21e IPR008991 Translation protein SH3-like domain superfamily IPR018259 Ribosomal protein L21e2C conserved site IPR036948 Ribosomal protein L21 superfamily	5.46e-42	CE00078	rpl-21	60S ribosomal protein L21	1e-44	Q23TC8	Tetrahymena thermophila	60S ribosomal protein L21	1e-47	8.65943	0.00350438	7.0885	0.015086	0.313822	0.266188		9.67922	23.9361	9.57957	19.1439	0.582822	2.18899		0.266188	11.197	5.68171	7.3584	4.51469	6.95993
Mg66190	439					Minc3s00928g18964	IPR015590 Aldehyde dehydrogenase domain IPR016160 Aldehyde dehydrogenase2C cysteine active site IPR016161 Aldehyde/histidinol dehydrogenase IPR016162 Aldehyde dehydrogenase2C N-terminal IPR016163 Aldehyde dehydrogenase2C C-terminal IPR029510 Aldehyde dehydrogenase2C glutamic acid active site	1.38e-33	CE45828	alh-2	Aldehyde dehydrogenase	2e-35	Q5RF00	Pongo abelii	Aldehyde dehydrogenase, mitochondrial	2e-36	8.65873	0.00167741	6.41706	0.023243	0.266188	0.266188		4.9727	9.14239	14.2363	16.7842	0.741139	0.907123		3.10849	0.266188	7.71254	13.0322	3.80661	4.44978
Mg30190	1359					Minc3s00686g16069	IPR000217 Tubulin IPR002453 Beta tubulin IPR003008 Tubulin/FtsZ2C GTPase domain IPR008280 Tubulin/FtsZ2C C-terminal IPR013838 Beta tubulin2C autoregulation binding site IPR017975 Tubulin2C conserved site IPR018316 Tubulin/FtsZ2C 2-layer sandwich domain IPR023123 Tubulin2C C-terminal IPR036525 Tubulin/FtsZ2C GTPase domain superfamily IPR037103 Tubulin/FtsZ2C C-terminal domain superfamily	0.0	CE00850	tbb-4	Tubulin beta-4 chain	0.0	P33188	Paramecium tetraurelia	PARTE Tubulin beta chain	0.0	8.63641	0.0203861	8.34482	0.0299856	1.00451	0.266188		148.521	160.038	169.77	301.13	13.8814	49.6182		62.7969	188.822	130.916	298.848	268.984	90.2134
Mg67629	698					Minc3s01060g20314	IPR001063 Ribosomal protein L22/L17 IPR005721 Ribosomal protein L22/L172C eukaryotic/archaeal IPR018260 Ribosomal protein L22/L172C conserved site IPR036394 Ribosomal protein L22/L17 superfamily	3.58e-83	CE22195	rpl-17	60S ribosomal protein L17	2e-75	Q09JW2	Argas monolakensis	ARGMO 60S ribosomal protein L17	2e-87	8.62077	0.00396071	9.28726	0.000744266	0.266188	0.266188		7.32596	6.18366	17.0303	111.173	15.4646	34.8767		4.52965	16.6623	2.97395	5.23074	12.6577	11.5619
Mg71441	702																8.6178	0.00209643	8.54708	0.00237233	0.266188	0.266188		7.32596	6.18366	3.0602	8.5252	2.00768	17.5714		1.68734	11.197	5.68171	11.6137	12.3036	22.0209
Mg77108	654												Q08451	Solanum lycopersicum	SOLLC Probable aquaporin PIP-type pTOM75	5e-71	8.61767	0.000331664	8.20305	0.000497589	0.266188	0.266188		7.32596	6.18366	5.85422	1.44605	7.54877	19.4942		5.9508	4.36523	12.4511	16.5783	10.8874	6.95993
Mg50146	755																8.60734	0.00381576	7.74611	0.00911592	0.361455	0.266188		37.9183	12.1011	3.99154	10.8849	0.899456	11.4825		5.9508	22.1277	13.1281	17.9967	13.3657	9.88845
Mg70177	704					Minc3s01455g23952	IPR001912 Ribosomal protein S4/S92C N-terminal IPR002942 RNA-binding S4 domain IPR005710 Ribosomal protein S4/S92C eukaryotic/archaeal IPR018079 Ribosomal protein S42C conserved site IPR022801 Ribosomal protein S4/S9 IPR036986 RNA-binding S4 domain superfamily	1.11e-77	CE05849	rps-9	40S ribosomal protein S9	2e-70	Q9LXG1	Arabidopsis thaliana	40S ribosomal protein S9-1	1e-75	8.59731	0.0149761	9.07726	0.00573764	0.266188	0.266188		9.67922	3.22492	1.19753	9.70506	7.07382	30.0697		1.68734	16.6623	19.8975	24.3797	47.3538	46.704
Mg62906	877					Minc3s05738g38748	IPR021138 60S ribosomal protein L18a/ L202C eukaryotes IPR023573 Ribosomal protein 50S-L18Ae/60S-L20/60S-L18A IPR028877 50S ribosomal protein L18Ae/60S ribosomal protein L20 and L18a	2.78e-57	CE21392	rpl-20	60S ribosomal protein L18a	1e-55	Q943F3	Oryza sativa	60S ribosomal protein L18a	1e-72	8.59655	0.00504569	9.08222	0.00157177	0.266188	0.266188		9.67922	3.22492	10.5109	19.1439	5.64897	34.5562		4.52965	13.9297	7.0356	25.0889	39.5649	37.9185
Mg66540	550					Minc3s00178g06870	IPR000892 Ribosomal protein S26e IPR038551 Ribosomal protein S26e superfamily	4.75e-54	CE16012	rps-26	40S ribosomal protein S26	1e-35	P30742	Cricetus cricetus	CRICR 40S ribosomal protein S26	1e-39	8.58735	0.00814943	8.54833	0.00765559	0.266188	0.266188		9.67922	3.22492	4.92288	68.698	8.81531	20.1352		1.68734	11.197	0.266188	1.68463	4.16065	6.54157
Mg63897	1249					Minc3s01495g24260	IPR003593 AAA+ ATPase domain IPR003959 ATPase2C AAA-type2C core IPR003960 ATPase2C AAA-type2C conserved site IPR005937 26S proteasome regulatory subunit P45-like IPR027417 P-loop containing nucleoside triphosphate hydrolase IPR032501 Proteasomal ATPase OB C-terminal domain IPR035244 26S Proteasome regulatory subunit 4 IPR041569 AAA ATPase2C AAA+ lid domain	0.0	CE09799	rpt-2	Probable 26S proteasome regulatory subunit 4	0.0	P48601	Drosophila melanogaster	26S protease regulatory subunit 4	0.0	8.57318	0.00625059	7.38841	0.0185435	0.266188	0.266188		9.67922	3.22492	4.92288	13.2446	5.0157	15.9691		1.68734	4.36523	0.943129	9.48607	0.974272	4.44978
Mg18566	1117		NXFT01000762.1.1934_g		0.0												8.50095	6.79888e-05	7.76997	0.000182492	0.361455	0.386546		40.2716	50.5647	3.0602	17.9641	0.741139	1.86853		25.8469	28.9595	7.0356	4.52152	0.266188	1.10291
Mg60561	321																8.37483	0.017311	7.70446	0.0304984	0.266188	0.266188		2.61945	9.14239	5.85422	12.0648	0.266188	0.907123		1.68734	5.73157	5.00477	6.64918	2.0364	1.93962
Mg65036	1078					Minc3s06637g40103	IPR001632 G-protein2C beta subunit IPR001680 WD40 repeat IPR015943 WD40/YVTN repeat-like-containing domain superfamily IPR016346 Guanine nucleotide-binding protein2C beta subunit IPR017986 WD40-repeat-containing domain IPR019775 WD40 repeat2C conserved site IPR020472 G-protein beta WD-40 repeat IPR036322 WD40-repeat-containing domain superfamily	1.19e-177	CE02186	gpb-1	Guanine nucleotide-binding protein subunit beta-1	2e-167	Q54C92	Dictyostelium discoideum	COP9 signalosome complex subunit 6	0.0	8.31396	0.0108848	7.98463	0.014517	0.266188	0.266188		4.9727	6.18366	5.85422	16.7842	5.9656	22.3784		5.9508	2.99888	8.38948	10.1953	0.266188	11.1435
Mg63147	776					Minc3s00132g05614	IPR000194 ATPase2C F1/V1/A1 complex2C alpha/beta subunit2C nucleotide-binding domain IPR004100 ATPase2C F1/V1/A1 complex2C alpha/beta subunit2C N-terminal domain IPR005723 ATPase2C V1 complex2C subunit B IPR020003 ATPase2C alpha/beta subunit2C nucleotide-binding domain2C active site IPR022879 V-type ATP synthase regulatory subunit B/beta IPR027417 P-loop containing nucleoside triphosphate hydrola…	2.76e-144	CE04424	vha-12	Probable V-type proton ATPase subunit B	1e-143	Q40079	Hordeum vulgare	HORVU V-type proton ATPase subunit B 2	1e-149	8.31378	0.00667217	6.98853	0.0299856	0.266188	0.266188		4.9727	6.18366	20.7556	34.4821	2.32431	9.55974		3.10849	1.63253	4.32783	15.8691	0.266188	5.2865
Mg77945	390					Minc3s02939g32142	IPR001196 Ribosomal protein L152C conserved site IPR021131 Ribosomal protein L18e/L15P IPR030878 Ribosomal protein L15 IPR036227 Ribosomal L18e/L15P superfamily	2.15e-15	CE26904			1e-14	Q00454	Tetrahymena thermophila	TETTH 60S ribosomal protein L27a	2e-17	8.31346	0.02522	7.71397	0.0373765	0.266188	0.266188		4.9727	6.18366	2.12886	41.5613	1.05777	16.61		3.10849	4.36523	4.32783	12.323	3.80661	13.2353
Mg64210	935																8.31289	0.00549929	7.97371	0.00606388	0.266188	0.266188		4.9727	6.18366	14.2363	40.3814	2.32431	19.4942		3.10849	5.73157	5.00477	15.1598	1.32831	8.63337
Mg71063	1141					Minc3s00030g01858	IPR001805 Adenosine kinase IPR002173 Carbohydrate/puine kinase2C PfkB2C conserved site IPR011611 Carbohydrate kinase PfkB IPR029056 Ribokinase-like	1.07e-53	CE12564			2e-70	Q9LZG0	Arabidopsis thaliana	Adenosine kinase 2	2e-70	8.3123	0.00487225	7.9691	0.00493435	0.266188	0.266188		4.9727	6.18366	7.71689	78.1369	6.12392	17.5714		1.68734	7.09792	0.266188	1.68463	5.93086	5.2865
Mg66783	643					Minc3s00038g02234	IPR001147 Ribosomal protein L21e IPR008991 Translation protein SH3-like domain superfamily IPR018259 Ribosomal protein L21e2C conserved site IPR036948 Ribosomal protein L21 superfamily	1.35e-63	CE00078	rpl-21	60S ribosomal protein L21	7e-56	Q6QN05	Chinchilla lanigera	CHILA 60S ribosomal protein L21	6e-62	8.31213	0.00234859	6.97483	0.0146814	0.266188	0.266188		4.9727	6.18366	17.0303	67.5182	7.07382	22.058		0.266188	4.36523	0.943129	3.8123	6.99299	4.44978
Mg26342	295		NXFT01001726.1.4427_g		5.12e-136												8.30036	5.43873e-06	6.44647	6.44393e-05	0.575806	0.386546		63.8042	83.1108	6.78555	21.5037	0.582822	1.22759		20.1623	20.7614	2.29701	3.10307	1.68236	3.61306
Mg71924	1153																8.29511	0.00950829	7.81014	0.0152228	0.313822	0.266188		19.0923	6.18366	12.3736	7.34534	2.16599	16.2896		11.6354	7.09792	9.06642	66.2238	19.3845	31.6431
Mg57983	306					Minc3s01153g21227	IPR000626 Ubiquitin domain IPR002906 Ribosomal protein S27a IPR011332 Zinc-binding ribosomal protein IPR019956 Ubiquitin IPR029071 Ubiquitin-like domain superfamily IPR038582 S27a-like superfamily	7.19e-22	CE20938	ubl-1	Ubiquitin-like protein 1	1e-13	P0CG87	Hordeum vulgare	HORVU Ubiquitin-40S ribosomal protein S27a	1e-13	8.27521	0.00056094	8.397	0.000339041	0.266188	0.266188		7.32596	3.22492	4.92288	7.34534	3.43253	13.0849		7.37195	4.36523	10.4203	15.1598	26.8193	13.6537
Mg70288	909																8.2742	0.00373868	6.99595	0.0185242	0.266188	0.266188		7.32596	3.22492	3.0602	4.98562	2.48263	21.417		4.52965	0.266188	5.00477	12.323	25.4032	18.674
Mg65404	1005																8.26788	0.0107448	7.97896	0.0152228	0.266188	0.266188		7.32596	3.22492	0.266188	2.62591	0.582822	11.1621		4.52965	4.36523	2.29701	8.06763	14.0738	18.674
Mg67981	820					Minc3s02729g31373	IPR000426 Proteasome alpha-subunit2C N-terminal domain IPR001353 Proteasome2C subunit alpha/beta IPR023332 Proteasome alpha-type subunit IPR029055 Nucleophile aminohydrolases2C N-terminal	2.67e-71	CE08184	pas-1	Proteasome subunit alpha type-6	7e-86	P60901	Rattus norvegicus	Proteasome subunit alpha type-6	2e-109	8.26308	0.00882983	8.54434	0.00961982	0.266188	0.266188		7.32596	3.22492	3.99154	23.8634	1.21609	3.47086		1.68734	11.197	2.29701	3.8123	2.0364	1.93962
Mg61097	587		NXFT01000074.1.1770_g		0.0												8.25809	0.0153135	8.11817	0.0221561	0.290005	0.314332		26.152	6.18366	0.266188	2.62591	0.424505	0.907123		13.0566	16.6623	1.62007	7.3584	0.266188	2.35798
Mg63297	1466					Minc3s04471g36362	IPR016699 Acid ceramidase-like IPR029130 Acid ceramidase2C N-terminal IPR029132 Choloylglycine hydrolase/NAAA C-terminal	7.83e-30	CE12120	asah-1	Acid ceramidase	2e-51	A5A6P2	Pan troglodytes	PANTR Acid ceramidase	1e-65	8.2563	0.0170997	7.39667	0.0338995	0.266188	0.266188		9.67922	0.266188	36.5884	59.2591	8.49867	27.5059		3.10849	2.99888	7.0356	20.1244	3.09852	19.5107
Mg65525	1028																8.25569	0.0185033	7.97476	0.015946	0.266188	0.266188		9.67922	0.266188	61.7345	40.3814	7.23214	22.3784		3.10849	5.73157	7.71254	18.7059	2.0364	15.7455
Mg64869	420					Minc3s00417g11967	IPR005755 Ribosomal protein L132C eukaryotic/archaeal IPR005822 Ribosomal protein L13 IPR036899 Ribosomal protein L13 superfamily	3.37e-45	CE01030	rpl-16	60S ribosomal protein L13a	4e-36	Q9P720	Neurospora crassa	60S ribosomal protein L16	2e-50	8.25494	0.0089211	8.20619	0.00530128	0.266188	0.266188		9.67922	0.266188	31.9317	62.7987	7.23214	20.1352		7.37195	2.99888	16.5128	17.2875	2.0364	13.2353
Mg65319	461																8.24481	0.0230817	9.86358	0.00597792	0.266188	0.266188		9.67922	0.266188	73.8419	6.16548	0.899456	0.266188		25.8469	5.73157	15.8358	7.3584	0.974272	1.10291
Mg63414	434																8.23604	0.00927831	7.39674	0.0208396	0.266188	0.266188		9.67922	0.266188	20.7556	29.7627	2.16599	11.1621		3.10849	2.99888	8.38948	14.4506	0.974272	13.6537
Mg62045	194					Minc3s00960g19311	IPR004000 Actin family IPR004001 Actin2C conserved site IPR020902 Actin/actin-like conserved site	1.05e-36	CE28620	act-4	Actin-4	3e-36	P30161	Costaria costata	COSCS Actin (Fragment)	3e-37	8.23122	0.0236529	9.97882	0.0098492	0.266188	0.266188		9.67922	0.266188	0.266188	0.266188	0.266188	0.907123		20.1623	13.9297	19.8975	13.7414	1.32831	24.9494
Mg57385	511					Minc3s01063g20336	IPR002067 Mitochondrial carrier protein IPR002113 Adenine nucleotide translocator 1 IPR018108 Mitochondrial substrate/solute carrier IPR019095 Mediator complex2C subunit Med18 IPR023395 Mitochondrial carrier domain superfamily	1.80e-75	CE14263	ant-1.1		8e-64	P51881	Mus musculus	ADP/ATP translocase 2	1e-66	8.18425	0.0225954	7.27584	0.0472466	0.266188	0.314332		12.0325	12.1011	0.266188	1.44605	0.424505	4.43226		7.37195	5.73157	13.805	42.1103	72.1367	8.21501
Mg9812	372					Minc3s10849g44413	IPR002119 Histone H2A IPR007125 Histone H2A/H2B/H3 IPR009072 Histone-fold IPR032454 Histone H2A2C C-terminal domain IPR032458 Histone H2A conserved site	7.60e-53	CE05477	his-35	Histone H2A	1e-32	P35064	Tetrahymena thermophila	TETTH Histone H2A.X	3e-37	8.18414	0.00658179	8.8662	0.005608	0.480539	0.266188		44.9781	26.8948	54.2838	120.612	2.48263	5.0732		21.5835	94.5441	34.1132	61.2592	22.9249	14.9088
Mg41214	400					Minc3s01335g22885	IPR002415 H/ACA ribonucleoprotein complex2C subunit Nhp22C eukaryote IPR004038 Ribosomal protein L7Ae/L30e/S12e/Gadd45 IPR018492 Ribosomal protein L7Ae/L8/Nhp2 family IPR029064 50S ribosomal protein L30e-like	3.94e-51	CE02283		NHP2-like protein 1 homolog	2e-40	Q6C603	Yarrowia lipolytica	YARLI 60S ribosomal protein L7	8e-48	8.15165	0.0168142	6.89639	0.0459348	0.313822	0.266188		0.266188	23.9361	7.71689	12.0648	0.582822	1.86853		0.266188	9.83061	10.4203	7.3584	3.80661	6.12322
Mg49899	419		NXFT01002498.1.6645_g		6.33e-67												8.14201	0.0212567	7.45584	0.039599	0.361455	0.314332		37.9183	12.1011	0.266188	14.4245	0.266188	0.266188		25.8469	5.73157	2.97395	0.266188	0.266188	1.10291
Mg17272	662	SP	NXFT01000053.1.1211_g		9.39e-127												8.02696	5.51185e-05	7.00949	0.000167862	0.980691	0.60319		155.581	127.492	32.863	71.0577	0.899456	3.47086		85.5353	54.92	35.4671	21.5428	1.68236	3.61306
Mg13136	2142		NXFT01000033.1.8574_g	IPR008758 Peptidase S28 IPR029058 Alpha/Beta hydrolase fold	0.0	Minc3s02311g29387	IPR008758 Peptidase S28 IPR029058 Alpha/Beta hydrolase fold	8.78e-171	CE00464	pcp-5	Prolyl carboxy peptidase like protein 5	1e-89	A4K2W1	Pongo abelii	Protein SYS1 homolog	2e-88	8.02265	6.41823e-07	7.07346	2.13684e-06	2.2668	1.7827		557.988	364.191	101.782	138.31	3.43253	2.82993		287.339	191.555	55.0984	25.0889	6.63894	3.61306
Mg36685	689		NXFT01000283.1.7441_g		0.0	Minc3s00392g11526	IPR021109 Aspartic peptidase domain superfamily	4.03e-47									8.02051	0.00222929	7.11589	0.00561168	0.456722	0.362475		47.3314	35.771	99.9193	59.2591	86.3906	66.9234		14.4777	30.3258	47.652	122.252	62.2235	231.619
Mg26597	488	SP															8.015	0.0249565	7.79943	0.0346677	1.02832	0.266188		77.9237	130.451	199.572	357.763	9.76521	72.3713		65.6392	112.307	153.255	229.345	147.902	127.866
Mg12227	374																7.98437	9.67495e-05	7.64925	0.000172917	0.742524	0.410618		66.1574	100.863	5.85422	14.4245	0.266188	0.907123		78.4296	53.5537	16.5128	25.7982	1.68236	5.2865
Mg47639	211																7.97296	0.000400565	10.1496	9.05859e-05	0.409089	0.29026		21.4455	29.8535	1.19753	0.266188	1.37441	0.586656		135.276	93.1777	22.6052	22.9613	0.266188	3.1947
Mg69973	459																7.96829	0.028392	7.70154	0.0261841	0.266188	0.266188		0.266188	9.14239	0.266188	7.34534	5.33233	20.1352		0.266188	7.09792	8.38948	8.77685	20.4466	15.7455
Mg66189	1178																7.96455	0.0309187	7.70808	0.0269982	0.266188	0.266188		0.266188	9.14239	10.5109	46.2807	1.84936	5.71413		1.68734	5.73157	2.29701	20.1244	13.0117	2.35798
Mg67584	576	SP															7.94982	0.0175676	6.98748	0.0370852	0.266188	0.266188		0.266188	9.14239	4.92288	9.70506	2.95758	27.1854		3.10849	1.63253	4.32783	10.9045	45.9376	32.4798
Mg63904	295					Minc3s08745g42556	IPR011035 Ribosomal protein L25/Gln-tRNA synthetase2C anti-codon-binding domain superfamily IPR020056 Ribosomal protein L25/Gln-tRNA synthetase2C N-terminal IPR020059 Glutamyl/glutaminyl-tRNA synthetase2C class Ib2C anti-codon binding domain	1.83e-13					Q47Z40	Colwellia psychrerythraea	COLP3 Glutaminyl-tRNA synthetase	2e-13	7.93958	0.0230483	7.98652	0.0277684	0.266188	0.266188		2.61945	6.18366	3.99154	8.5252	0.582822	0.266188		5.9508	2.99888	2.97395	8.77685	2.39044	1.52127
Mg29415	730		NXFT01000941.1.2454_g		0.0												7.93441	4.09959e-05	6.26838	0.000347011	0.599623	0.458761		66.1574	71.2758	3.0602	22.6835	1.05777	2.50946		18.7412	24.8604	2.29701	3.10307	0.974272	2.77634
Mg69353	1326					Minc3s05292g37949	IPR002133 S-adenosylmethionine synthetase IPR022628 S-adenosylmethionine synthetase2C N-terminal IPR022629 S-adenosylmethionine synthetase2C central domain IPR022630 S-adenosylmethionine synthetase2C C-terminal IPR022631 S-adenosylmethionine synthetase2C conserved site IPR022636 S-adenosylmethionine synthetase superfamily	9.86e-160	CE03959	sams-4	Probable S-adenosylmethionine synthase 4	2e-155	P46286	Arabidopsis thaliana	60S ribosomal protein L8-1	4e-159	7.93337	0.0114434	7.98587	0.013177	0.266188	0.266188		2.61945	6.18366	3.0602	19.1439	3.90748	9.88021		5.9508	2.99888	0.266188	0.97541	2.39044	4.86814
Mg69345	510					Minc3s00266g08976	IPR000504 RNA recognition motif domain IPR012677 Nucleotide-binding alpha-beta plait domain superfamily IPR035979 RNA-binding domain superfamily	1.82e-11					P46286	Arabidopsis thaliana	60S ribosomal protein L8-1	1e-13	7.9256	0.00623175	6.98014	0.0159311	0.266188	0.266188		2.61945	6.18366	1.19753	6.16548	1.37441	12.4439		1.68734	2.99888	7.0356	12.323	17.6142	14.4904
Mg67514	1566																7.92268	0.00629628	6.39577	0.041096	0.266188	0.266188		2.61945	6.18366	2.12886	4.98562	2.79926	23.3398		0.266188	2.99888	7.71254	15.8691	13.7198	16.1638
Mg37895	1112	SP															7.91944	0.00862741	6.86471	0.0214617	0.528173	0.266188		30.8585	41.6885	24.481	74.5973	2.16599	3.47086		3.10849	31.6922	36.821	49.9117	8.7632	10.3068
Mg72134	1132					Minc3s00925g18941	IPR000169 Cysteine peptidase2C cysteine active site IPR000668 Peptidase C1A2C papain C-terminal IPR025660 Cysteine peptidase2C histidine active site IPR038765 Papain-like cysteine peptidase superfamily	4.43e-53	CE31896	cpr-1	Gut-specific cysteine proteinase	4e-73	Q5R6D1	Pongo abelii	Cathepsin B	1e-77	7.9191	0.00790679	7.38399	0.00961982	0.266188	0.266188		2.61945	6.18366	3.99154	14.4245	4.0658	23.6603		0.266188	5.73157	5.00477	11.6137	22.5708	19.0923
Mg69065	358					Minc3s01242g22009	IPR000231 Ribosomal protein L30e IPR004038 Ribosomal protein L7Ae/L30e/S12e/Gadd45 IPR022991 Ribosomal protein L30e2C conserved site IPR029064 50S ribosomal protein L30e-like IPR039109 Ribosomal protein L30/YlxQ	3.03e-42	CE44850	rpl-30		5e-41	Q8VZ19	Arabidopsis thaliana	60S ribosomal protein L30-2	4e-45	7.91877	0.00458003	6.39707	0.0333874	0.266188	0.266188		2.61945	6.18366	5.85422	23.8634	4.85738	22.6989		0.266188	2.99888	5.00477	4.52152	25.4032	17.4189
Mg35914	617																7.91068	0.00473455	7.9425	0.00560693	0.361455	0.266188		19.0923	12.1011	15.1676	29.7627	0.582822	4.1118		3.10849	28.9595	28.0208	21.5428	12.3036	11.5619
Mg68761	577																7.9072	0.0372832	8.20199	0.0123115	0.266188	0.266188		2.61945	6.18366	6.78555	15.6044	6.44055	40.9655		5.9508	4.36523	13.1281	51.3301	53.7265	41.6837
Mg67578	562					Minc3s01250g22088	IPR000235 Ribosomal protein S5/S7 IPR005716 Ribosomal protein S5/S72C eukaryotic/archaeal IPR020606 Ribosomal protein S72C conserved site IPR023798 Ribosomal protein S7 domain IPR036823 Ribosomal protein S7 domain superfamily	2.16e-92	CE06360	rps-5	40S ribosomal protein S5	1e-90	P46782	Homo sapiens	40S ribosomal protein S5	5e-92	7.87843	0.0108373	7.70371	0.00714288	0.266188	0.266188		4.9727	3.22492	3.99154	10.8849	4.0658	24.9422		0.266188	7.09792	7.71254	21.5428	23.2789	23.6943
Mg66243	1855					Minc3s00146g06024	IPR003952 Fumarate reductase/succinate dehydrogenase2C FAD-binding site IPR003953 FAD-dependent oxidoreductase 22C FAD binding domain IPR011281 Succinate dehydrogenase2C flavoprotein subunit IPR014006 Succinate dehydrogenase/fumarate reductase2C flavoprotein subunit IPR015939 Fumarate reductase/succinate dehydrogenase flavoprotein-like2C C-terminal IPR027477 Succinate dehydrogenase/fumarate reduc…	0.0	CE03917	sdha-1	Succinate dehydrogenase [ubiquinone] flavoprotein subunit, mitochondrial	0.0	Q9R1P0	Mus musculus	Proteasome subunit alpha type-4	0.0	7.87508	0.00189502	8.39257	0.000697059	0.266188	0.266188		4.9727	3.22492	13.3049	30.9425	10.3985	11.1621		5.9508	5.73157	2.29701	4.52152	1.68236	7.37829
Mg62151	177					Minc3s00104g04657	IPR000077 Ribosomal protein L39e IPR020083 Ribosomal protein L39e2C conserved site IPR023626 Ribosomal protein L39e domain superfamily	1.17e-15	CE06883	rpl-39	60S ribosomal protein L39	5e-16	Q962S4	Spodoptera frugiperda	SPOFR 60S ribosomal protein L39	2e-15	7.87083	0.0165237	6.98982	0.0350457	0.266188	0.266188		4.9727	3.22492	7.71689	32.1224	1.21609	6.35507		3.10849	1.63253	3.65089	3.10307	0.266188	2.35798
Mg22536	1035		NXFT01002553.1.6719_g		0.0												7.8562	6.12714e-08	6.52249	3.46355e-07	1.83809	1.42162		294.423	346.438	25.4123	63.9786	1.53272	0.907123		133.855	120.505	10.4203	17.9967	3.45257	5.2865
Mg70310	1024																7.83946	0.00541282	8.20274	0.00149882	0.266188	0.266188		7.32596	0.266188	3.99154	12.0648	3.59084	23.3398		5.9508	4.36523	7.71254	8.77685	22.2168	31.6431
Mg73074	749																7.83269	0.0220556	7.38343	0.0257251	0.266188	0.266188		7.32596	0.266188	3.0602	7.34534	2.79926	19.1738		0.266188	5.73157	2.29701	12.323	28.9436	19.9291
Mg52368	542					Minc3s00132g05617	IPR000630 Ribosomal protein S8 IPR035987 Ribosomal protein S8 superfamily	4.58e-82	CE10884	rps-22		2e-77	P62246	Rattus norvegicus	40S ribosomal protein S15a	3e-80	7.82256	0.0450303	7.89783	0.0376766	0.313822	0.266188		9.67922	9.14239	13.3049	101.734	10.2402	29.7492		1.68734	18.0287	0.266188	5.23074	6.63894	7.37829
Mg63525	1155																7.81983	0.0117157	6.97082	0.0266302	0.266188	0.266188		7.32596	0.266188	17.0303	19.1439	2.64094	10.5211		0.266188	4.36523	4.32783	10.1953	2.0364	6.54157
Mg22080	336					Minc3s02531g30496	IPR000558 Histone H2B IPR007125 Histone H2A/H2B/H3 IPR009072 Histone-fold	7.81e-45	CE10538	his-54	Histone H2B 2	6e-43	P08994	Tetrahymena thermophila	TETTH Histone H2B.2	7e-51	7.81441	0.0283903	7.3455	0.0449037	2.00481	0.266188		235.592	162.997	199.572	454.512	14.1981	22.6989		68.4815	220.248	103.161	231.472	89.1307	70.1322
Mg79810	369					Minc3s00140g05847	IPR001373 Cullin2C N-terminal IPR016157 Cullin2C conserved site IPR016158 Cullin homology domain IPR016159 Cullin repeat-like-containing domain superfamily IPR019559 Cullin protein2C neddylation domain IPR036317 Cullin homology domain superfamily IPR036388 Winged helix-like DNA-binding domain superfamily IPR036390 Winged helix DNA-binding domain superfamily	6.49e-18	CE27593	cul-3	Cullin-3	1e-15	Q9SRZ0	Arabidopsis thaliana	Cullin-2	3e-36	7.79567	0.0358241	9.29928	0.0238953	0.266188	0.266188		7.32596	0.266188	2.12886	3.80577	0.424505	6.67554		11.6354	9.83061	2.29701	2.39385	1.68236	1.52127
Mg70536	793																7.79472	0.00110487	6.11216	0.01487	0.313822	0.266188		12.0325	6.18366	4.92288	7.34534	3.90748	20.7761		3.10849	2.99888	4.32783	20.1244	17.6142	19.9291
Mg64356	323																7.78813	0.0404208	8.3866	0.0402748	0.266188	0.266188		7.32596	0.266188	3.99154	8.5252	0.424505	0.266188		4.52965	7.09792	1.62007	0.97541	1.68236	3.61306
Mg61831	523					Minc3s00098g04481	IPR004790 Isocitrate dehydrogenase NADP-dependent IPR019818 Isocitrate/isopropylmalate dehydrogenase2C conserved site IPR024084 Isopropylmalate dehydrogenase-like domain	1.23e-68	CE03436	idh-1	Isocitrate dehydrogenase [NADP]	2e-73	Q8X034	Neurospora crassa	60S ribosomal protein L15	5e-79	7.7475	0.0118044	8.06411	0.0123667	0.290005	0.266188		12.0325	0.266188	4.92288	15.6044	0.582822	2.50946		5.9508	9.83061	5.00477	8.06763	6.63894	3.1947
Mg13340	751		NXFT01004218.1.10979_g		0.0												7.73321	0.0074038	5.91787	0.0283417	1.29031	0.410618		94.3965	162.997	3.0602	10.8849	0.899456	1.54806		44.3219	28.9595	11.7742	0.97541	0.974272	0.266188
Mg23131	256		NXFT01004076.1.10669_g	IPR001841 Zinc finger 2C RING-type	3.42e-132												7.72752	0.00302972	6.35449	0.0119875	0.361455	0.410618		28.5053	29.8535	3.0602	4.98562	0.266188	0.266188		11.6354	11.197	2.97395	1.68463	0.266188	0.266188
Mg39326	709		NXFT01003688.1.9621_g		0.0												7.717	0.00123642	5.79443	0.00626731	1.12359	1.6142		150.875	322.768	9.57957	38.0217	1.53272	0.266188		68.4815	56.2864	14.4819	4.52152	1.68236	1.93962
Mg14166	1603		NXFT01001311.1.3380_g	IPR008758 Peptidase S28 IPR029058 Alpha/Beta hydrolase fold	0.0	Minc3s02311g29387	IPR008758 Peptidase S28 IPR029058 Alpha/Beta hydrolase fold	0.0	CE00464	pcp-5	Prolyl carboxy peptidase like protein 5	3e-111	Q9XZD5	Toxoplasma gondii	TOXGO Peroxisomal catalase	5e-110	7.66185	8.52148e-10	7.41899	1.60038e-09	3.91015	4.0695		602.7	914.515	77.5672	115.892	4.38243	4.1118		671.05	609.657	150.547	86.082	10.1794	9.88845
Mg35975	368					Minc3s07231g40880	IPR001951 Histone H4 IPR009072 Histone-fold IPR035425 CENP-T/Histone H42C histone fold	7.02e-42	CE03252	his-46	Histone H4	2e-40	P02310	Tetrahymena pyriformis	TETPY Histone H4, major	2e-48	7.63859	0.0245661	7.6475	0.0315831	1.19504	0.266188		122.636	68.3171	94.3313	262.195	3.74916	7.63694		42.9008	150.564	58.4831	103.813	31.7759	25.3677
Mg61150	615					Minc3s02635g30966	IPR005998 Ribosomal protein L72C eukaryotic IPR012988 Ribosomal protein L302C N-terminal IPR016082 Ribosomal protein L302C ferredoxin-like fold domain IPR018038 Ribosomal protein L302C conserved site IPR023106 Ribosomal protein L302C central domain2C archaeal type IPR035808 Ribosomal protein L72C eukaryotic/archaeal IPR036919 Ribosomal protein L302C ferredoxin-like fold domain superfamily IPR0396…	3.26e-87	CE11024	rpl-7	60S ribosomal protein L7	7e-69	P60039	Arabidopsis thaliana	60S ribosomal protein L7-3	1e-76	7.58903	0.0456245	8.18301	0.0196209	0.313822	0.266188		9.67922	6.18366	44.9704	61.6189	8.81531	31.3515		5.9508	18.0287	10.4203	21.5428	1.32831	21.6025
Mg36553	460	SP															7.5888	0.0221393	7.22709	0.0315236	0.409089	0.266188		0.266188	35.771	13.3049	61.6189	2.48263	6.35507		11.6354	15.296	15.8358	18.7059	13.3657	8.63337
Mg53212	602					Minc3s00016g01093	IPR000711 ATPase2C OSCP/delta subunit IPR026015 F1F0 ATP synthase OSCP/delta subunit2C N-terminal domain superfamily	1.63e-14	CE09719	atp-3		3e-23	P05438	Rhodospirillum	RHORU ATP synthase subunit delta	5e-16	7.57987	0.0105498	7.08812	0.0185813	0.313822	0.266188		9.67922	6.18366	5.85422	15.6044	0.582822	1.86853		0.266188	11.197	11.0972	12.323	3.45257	9.47009
Mg27323	270		NXFT01000916.1.2361_g	IPR001930 Peptidase M1 2C alanine aminopeptidase/leukotriene A4 hydrolase IPR014782 Peptidase M1 2C membrane alanine aminopeptidase IPR015211 Peptidase M1 2C leukotriene A4 hydrolase/aminopeptidase C-terminal IPR016024 Armadillo-type fold IPR027268 Peptidase M4/M1 2C CTD superfamily IPR038502 Peptidase M1 LTA-4 hydrolase/aminopeptidase 2C C-terminal domain superfamily	2.29e-94												7.49424	3.19219e-07	7.68438	1.00912e-07	0.385272	0.386546		30.8585	18.0186	129.722	67.5182	29.7131	34.2357		41.4796	15.296	74.0527	65.5146	42.7512	39.5919
Mg37491	257																7.47409	0.00129876	7.3489	0.00172385	0.361455	0.266188		16.739	6.18366	15.1676	15.6044	1.53272	7.31647		13.0566	8.46427	8.38948	35.7273	9.47128	6.95993
Mg33720	824					Minc3s00965g19376	IPR000876 Ribosomal protein S4e IPR002942 RNA-binding S4 domain IPR005824 KOW IPR013843 Ribosomal protein S4e2C N-terminal IPR013845 Ribosomal protein S4e2C central region IPR014722 Ribosomal protein L22C domain 2 IPR018199 Ribosomal protein S4e2C N-terminal2C conserved site IPR032277 40S ribosomal protein S42C C-terminal domain IPR038237 Ribosomal protein S4e2C central domain superfamily IPR0419…	1.16e-88	CE24278	rps-4	40S ribosomal protein S4	8e-78	P0C233	Tetrahymena thermophila	TETTH 40S ribosomal protein S4	7e-101	7.46752	0.0115131	5.9266	0.0451372	0.55199	0.266188		19.0923	38.7297	15.1676	80.4966	1.84936	6.67554		5.9508	13.9297	18.5436	20.1244	18.6764	19.0923
Mg28346	843	SP_NLS	NXFT01004063.1.10632_g		0.0												7.4478	0.000730661	6.88323	0.00174078	0.647257	0.314332		56.7444	23.9361	7.71689	12.0648	0.899456	0.266188		35.795	19.395	9.74336	7.3584	1.68236	0.266188
Mg18918	1303		NXFT01002153.1.5683_g	IPR001304 C-type lectin-like IPR016186 C-type lectin-like/link domain superfamily IPR016187 C-type lectin fold IPR018378 C-type lectin 2C conserved site	0.0	Minc3s00143g05936	IPR001304 C-type lectin-like IPR016186 C-type lectin-like/link domain superfamily IPR016187 C-type lectin fold	3.31e-114									7.43539	3.87876e-05	7.35514	4.62038e-05	0.55199	0.699477		89.69	38.7297	780.727	633.851	46.0198	62.1164		78.4296	45.3556	531.665	324.38	128.429	78.081
Mg32629	588																7.41952	0.0112898	6.88522	0.0205865	0.361455	0.266188		4.9727	18.0186	3.99154	29.7627	0.582822	3.15039		3.10849	12.5633	2.97395	11.6137	6.63894	6.12322
Mg14162	970					Minc3s01240g21983	IPR002226 Catalase haem-binding site IPR010582 Catalase immune-responsive domain IPR011614 Catalase core domain IPR018028 Catalase2C mono-functional2C haem-containing IPR020835 Catalase superfamily IPR024708 Catalase active site IPR024711 Catalase2C mono-functional2C haem-containing2C clades 1 and 3 IPR037060 Catalase core domain superfamily IPR040333 Catalase2C clade 3	1.84e-102	CE30713	ctl-1	Catalase-2	2e-91	Q9XZD5	Toxoplasma gondii	TOXGO Peroxisomal catalase	2e-116	7.40281	0.00265668	7.75057	0.00175304	0.361455	0.266188		4.9727	18.0186	9.57957	26.2231	1.53272	7.95741		8.7931	19.395	17.1897	38.5642	12.6577	14.9088
Mg72034	469																7.39002	0.0178913	6.9795	0.0196902	0.266188	0.266188		0.266188	6.18366	3.0602	3.80577	2.48263	11.803		1.68734	2.99888	7.0356	14.4506	5.22278	6.95993
Mg71999	542					Minc3s00114g04989	IPR000439 Ribosomal protein L15e IPR012678 Ribosomal protein L23/L15e core domain superfamily IPR020925 Ribosomal protein L15e2C conserved site IPR024794 Ribosomal protein L15e core domain superfamily	4.70e-48	CE12148	rpl-15	60S ribosomal protein L15	1e-37	Q22A30	Tetrahymena thermophila	60S ribosomal protein L15	5e-60	7.38883	0.021336	6.40526	0.0466309	0.266188	0.266188		0.266188	6.18366	2.12886	7.34534	1.69104	8.91881		1.68734	1.63253	2.97395	6.64918	11.9496	15.3271
Mg39	309																7.38348	0.0349072	7.86838	0.0350457	0.361455	0.314332		26.152	3.22492	6.78555	0.266188	6.28223	6.996		5.9508	35.7912	11.7742	0.266188	0.266188	0.266188
Mg68597	364					Minc3s00665g15823	IPR001209 Ribosomal protein S14 IPR018271 Ribosomal protein S142C conserved site IPR039744 40S ribosomal protein S29/30S ribosomal protein S14 type Z	5.09e-25	CE26849	rps-29		6e-24	Q4PM47	Ixodes scapularis	IXOSC 40S ribosomal protein S29	8e-26	7.38159	0.0462755	7.38082	0.0315236	0.266188	0.266188		0.266188	6.18366	3.99154	51.0001	3.27421	7.31647		0.266188	5.73157	0.266188	0.266188	4.16065	3.61306
Mg65989	601																7.38093	0.0263995	8.38241	0.00701188	0.266188	0.266188		0.266188	6.18366	1.19753	15.6044	1.84936	4.43226		3.10849	8.46427	8.38948	18.7059	9.82532	5.70486
Mg6003	1399		NXFT01001758.1.4533_g		0.0	Minc3s05451g38267		1.29e-19									7.3504	1.2185e-07	5.52954	2.26763e-06	1.07596	0.843906		136.755	94.9457	14.2363	39.2015	2.00768	2.18899		37.2162	28.9595	11.0972	11.6137	2.39044	3.1947
Mg30078	761																7.34557	0.00389048	6.48462	0.0105262	0.480539	0.266188		14.3857	26.8948	7.71689	40.3814	1.05777	4.1118		7.37195	15.296	11.7742	19.4152	15.136	10.3068
Mg69778	549					Minc3s03381g33676	IPR004192 Cytochrome b-c1 complex subunit Rieske2C transmembrane domain IPR005805 Rieske iron-sulphur protein2C C-terminal IPR006317 Ubiquinol-cytochrome c reductase2C iron-sulphur subunit IPR014349 Rieske iron-sulphur protein IPR017941 Rieske [2Fe-2S] iron-sulphur domain IPR036922 Rieske [2Fe-2S] iron-sulphur domain superfamily IPR037008 Cytochrome bc1 complex subunit Rieske2C transmembrane doma…	1.59e-57	CE17071	isp-1	Cytochrome b-c1 complex subunit Rieske, mitochondrial	4e-53	P08094	Schizosaccharomyces pombe	60S acidic ribosomal protein P2-alpha	4e-63	7.31913	0.0315568	6.97865	0.0415902	0.266188	0.266188		2.61945	3.22492	2.12886	6.16548	1.84936	2.18899		1.68734	2.99888	0.943129	11.6137	7.70107	3.61306
Mg69105	1119																7.31702	0.0179723	6.96968	0.0185435	0.266188	0.266188		2.61945	3.22492	2.12886	2.62591	3.11589	13.7258		0.266188	4.36523	2.97395	7.3584	13.3657	11.1435
Mg66603	1896					Minc3s02439g30051	IPR000152 EGF-type aspartate/asparagine hydroxylation site IPR000742 EGF-like domain IPR001881 EGF-like calcium-binding domain IPR002049 Laminin EGF domain IPR009030 Growth factor receptor cysteine-rich domain superfamily IPR013032 EGF-like2C conserved site IPR018097 EGF-like calcium-binding2C conserved site IPR026823 Complement Clr-like EGF domain	1.60e-15	CE42908	ten-1	Teneurin-1	1e-34	Q80YX1	Mus musculus	Tenascin	8e-44	7.31461	0.0369839	6.97349	0.030778	0.266188	0.266188		2.61945	3.22492	2.12886	9.70506	2.00768	19.8147		0.266188	4.36523	5.00477	17.2875	23.987	23.2759
Mg63771	583																7.3142	0.0178413	7.7142	0.00351324	0.266188	0.266188		2.61945	3.22492	3.0602	13.2446	4.38243	26.224		3.10849	4.36523	3.65089	16.5783	25.0491	19.9291
Mg19999	526					Minc3s01060g20314	IPR001063 Ribosomal protein L22/L17 IPR005721 Ribosomal protein L22/L172C eukaryotic/archaeal IPR018260 Ribosomal protein L22/L172C conserved site IPR036394 Ribosomal protein L22/L17 superfamily	4.95e-47	CE22195	rpl-17	60S ribosomal protein L17	8e-29	P0DJ16	Tetrahymena thermophila	60S ribosomal protein L17	1e-42	7.30615	0.00624317	6.56226	0.0150635	0.409089	0.266188		4.9727	23.9361	9.57957	8.5252	1.21609	3.47086		5.9508	11.197	5.68171	8.06763	5.22278	4.86814
Mg50080	1153					Minc3s00960g19311	IPR004000 Actin family IPR004001 Actin2C conserved site IPR020902 Actin/actin-like conserved site	0.0	CE12358	act-4	Actin-4	0.0	P10992	Tetrahymena thermophila	TETTH Actin, macronuclear	0.0	7.30013	0.0243557	7.10759	0.0314724	0.69489	0.266188		21.4455	53.5234	54.2838	100.554	2.32431	14.3668		23.0046	41.2566	45.6212	52.7486	31.4219	24.531
Mg69219	641					Minc3s00125g05365	IPR000530 Ribosomal protein S12e IPR004038 Ribosomal protein L7Ae/L30e/S12e/Gadd45 IPR029064 50S ribosomal protein L30e-like	3.95e-35	CE26896	rps-12	40S ribosomal protein S12	7e-42	P84175	Gallus gallus	40S ribosomal protein S12	6e-44	7.2668	0.0307095	8.5477	0.00291341	0.266188	0.266188		4.9727	0.266188	2.12886	8.5252	5.0157	22.6989		1.68734	11.197	1.62007	8.06763	24.341	27.0412
Mg58930	103																7.25986	0.00960323	10.5828	0.000216593	0.266188	0.266188		4.9727	0.266188	5.85422	6.16548	0.899456	1.86853		10.2143	41.2566	11.7742	17.2875	2.74448	3.61306
Mg64515	495																7.25762	0.0224238	10.1547	0.00130706	0.266188	0.266188		4.9727	0.266188	34.7257	9.70506	0.266188	0.266188		27.2681	11.197	6.35865	5.93996	0.266188	1.10291
Mg66723	368																7.25726	0.0233538	9.72398	0.00181566	0.266188	0.266188		4.9727	0.266188	34.7257	22.6835	0.266188	0.586656		21.5835	7.09792	7.0356	1.68463	0.266188	0.266188
Mg66869	1333																7.2568	0.0319885	7.38182	0.0163943	0.266188	0.266188		4.9727	0.266188	3.0602	4.98562	1.69104	16.61		0.266188	5.73157	9.74336	6.64918	17.2602	17.0006
Mg65225	759					Minc3s02959g32217	IPR001047 Ribosomal protein S8e IPR018283 Ribosomal protein S8e2C conserved site IPR022309 Ribosomal protein S8e/ribosomal biogenesis NSA2	2.57e-85	CE04561	rps-8	40S ribosomal protein S8	1e-67	Q7SYU0	Xenopus laevis	40S ribosomal protein S8	1e-72	7.25347	0.0150461	7.39679	0.00762364	0.266188	0.266188		4.9727	0.266188	43.1077	9.70506	2.79926	1.22759		3.10849	2.99888	2.29701	5.93996	6.99299	3.61306
Mg74925	772																7.2505	0.0329122	6.97038	0.0315236	0.266188	0.266188		4.9727	0.266188	1.19753	3.80577	1.84936	11.1621		0.266188	4.36523	5.00477	17.9967	12.3036	11.5619
Mg66258	787												P27639	Caenorhabditis elegans	Eukaryotic initiation factor 4A	1e-15	7.24989	0.0221825	7.3968	0.0136511	0.266188	0.266188		4.9727	0.266188	13.3049	9.70506	6.28223	15.3282		3.10849	2.99888	2.97395	5.93996	0.974272	9.47009
Mg68908	1516					Minc3s00333g10391	IPR001697 Pyruvate kinase IPR011037 Pyruvate kinase-like2C insert domain superfamily IPR015793 Pyruvate kinase2C barrel IPR015795 Pyruvate kinase2C C-terminal IPR015806 Pyruvate kinase2C insert domain superfamily IPR015813 Pyruvate/Phosphoenolpyruvate kinase-like domain superfamily IPR018209 Pyruvate kinase2C active site IPR036918 Pyruvate kinase2C C-terminal domain superfamily IPR040442 Pyruvate…	1.89e-133	CE24731	pyk-2	Pyruvate kinase	5e-124	Q54RF5	Dictyostelium discoideum	Pyruvate kinase	2e-147	7.24771	0.0483261	7.39681	0.0337005	0.266188	0.266188		4.9727	0.266188	5.85422	13.2446	4.69906	11.1621		3.10849	2.99888	2.97395	16.5783	0.266188	6.12322
Mg19282	432					Minc3s00354g10841	IPR002143 Ribosomal protein L1 IPR016095 Ribosomal protein L12C 3-layer alpha/beta-sandwich IPR023673 Ribosomal protein L12C conserved site IPR023674 Ribosomal protein L1-like IPR028364 Ribosomal protein L1/ribosomal biogenesis protein	3.98e-42	CE28379	rpl-1	Ribosomal protein	3e-31	Q86L05	Dictyostelium discoideum	60S ribosomal protein L10a	5e-33	7.24429	0.00110009	6.4097	0.00347172	0.575806	0.266188		28.5053	23.9361	9.57957	27.4029	0.582822	1.54806		11.6354	18.0287	10.4203	9.48607	5.93086	7.37829
Mg61650	305					Minc3s06441g39819	IPR000866 Alkyl hydroperoxide reductase subunit C/ Thiol specific antioxidant IPR013766 Thioredoxin domain IPR036249 Thioredoxin-like superfamily	7.88e-28	CE41559	prdx-2		6e-29	Q555L5	Dictyostelium discoideum	Peroxiredoxin-4	9e-35	7.2403	0.0433878	8.53933	0.018997	0.266188	0.266188		4.9727	0.266188	3.99154	19.1439	0.582822	0.907123		0.266188	12.5633	5.00477	8.06763	5.93086	2.35798
Mg72711	847																7.23857	0.0408814	7.38764	0.0350457	0.266188	0.266188		4.9727	0.266188	1.19753	6.16548	1.05777	5.71413		1.68734	4.36523	0.943129	8.77685	9.82532	10.7252
Mg46394	600					Minc3s00884g18478	IPR000702 Ribosomal protein L6 IPR002359 Ribosomal protein L62C conserved site-2 IPR020040 Ribosomal protein L62C alpha-beta domain IPR036789 Ribosomal protein L62C alpha-beta domain superfamily	5.90e-48	CE01380	rpl-9	60S ribosomal protein L9	7e-46	Q22AX5	Tetrahymena thermophila	60S ribosomal protein L9	2e-56	7.23523	0.00727154	5.45116	0.0470009	0.456722	0.266188		19.0923	15.0599	7.71689	32.1224	0.266188	1.86853		5.9508	4.36523	12.4511	11.6137	4.51469	5.2865
Mg72156	539																7.22769	0.04917	7.71284	0.0439906	0.266188	0.266188		4.9727	0.266188	0.266188	1.44605	1.53272	9.23928		3.10849	4.36523	1.62007	6.64918	3.80661	4.44978
Mg35645	1001																7.22176	0.00291349	6.2174	0.00969983	0.456722	0.266188		4.9727	29.8535	7.71689	36.8418	0.899456	1.54806		5.9508	11.197	13.1281	22.2521	7.70107	5.2865
Mg42964	610																7.2203	0.016057	6.50667	0.0317157	0.599623	0.266188		14.3857	41.6885	20.7556	6.16548	0.741139	6.35507		14.4777	19.395	15.8358	17.9967	17.2602	14.072
Mg38159	1603		NXFT01000625.1.1469_g	IPR000418 Ets domain IPR003118 Pointed domain IPR013761 Sterile alpha motif/pointed domain superfamily IPR036388 Winged helix-like DNA-binding domain superfamily IPR036390 Winged helix DNA-binding domain superfamily	0.0	Minc3s01341g22930	IPR003118 Pointed domain IPR013761 Sterile alpha motif/pointed domain superfamily	3.15e-76	CE34001	ets-4	Transcription factor ets-4	9e-48	Q9WUU7	Mus musculus	Cathepsin Z	3e-32	7.20495	2.60595e-06	4.90038	0.000172917	0.432906	0.579119		40.2716	35.771	17.0303	14.4245	9.60689	12.4439		5.9508	9.83061	13.805	14.4506	8.7632	7.79665
Mg48478	496					Minc3s07922g41697	IPR002130 Cyclophilin-type peptidyl-prolyl cis-trans isomerase domain IPR020892 Cyclophilin-type peptidyl-prolyl cis-trans isomerase2C conserved site IPR024936 Cyclophilin-type peptidyl-prolyl cis-trans isomerase IPR029000 Cyclophilin-like domain superfamily	3.09e-75	CE20374	cyn-3	Peptidyl-prolyl cis-trans isomerase 3	2e-61	P18253	Schizosaccharomyces pombe	Peptidyl-prolyl cis-trans isomerase	2e-73	7.14738	0.00136314	5.79987	0.00830255	0.456722	0.266188		14.3857	18.0186	13.3049	25.0432	1.21609	3.79133		3.10849	9.83061	11.0972	13.0322	10.1794	14.4904
Mg18786	671		NXFT01000807.1.182_g		0.0												7.13849	0.00700564	6.34735	0.0159426	0.837791	0.60319		44.9781	89.0282	2.12886	13.2446	0.266188	0.907123		40.0585	37.1575	5.68171	8.77685	0.266188	4.44978
Mg12346	1219		NXFT01002708.1.86_g	IPR000402 Sodium/potassium-transporting ATPase subunit beta IPR038702 Sodium/potassium-transporting ATPase subunit beta superfamily	2.65e-15												7.12925	0.00354475	5.25257	0.0155967	3.74344	2.07156		310.896	435.2	15.1676	104.094	2.16599	0.907123		121.064	82.247	7.0356	11.6137	3.09852	5.2865
Mg71392	1617					Minc3s01232g21926	IPR027350 Glycosyltransferase family 23 (GT23) domain	8.36e-15					Q6NVP8	Xenopus tropicalis	Alpha-(1,6)-fucosyltransferase	2e-18	7.0943	0.0386055	6.60874	0.0493953	0.290005	0.266188		4.9727	3.22492	0.266188	12.0648	1.69104	18.2124		1.68734	4.36523	2.29701	10.1953	21.8628	16.1638
Mg25845	638					Minc3s02959g32217	IPR001047 Ribosomal protein S8e IPR018283 Ribosomal protein S8e2C conserved site IPR022309 Ribosomal protein S8e/ribosomal biogenesis NSA2	1.26e-74	CE04561	rps-8	40S ribosomal protein S8	6e-61	Q08069	Zea mays	40S ribosomal protein S8	2e-72	7.07863	0.0271164	6.6647	0.0424909	0.599623	0.266188		42.6248	6.18366	28.2063	43.921	0.582822	2.82993		5.9508	31.6922	15.8358	14.4506	17.9683	16.1638
Mg48047	543					Minc3s00298g09650	IPR013126 Heat shock protein 70 family IPR018181 Heat shock protein 702C conserved site	3.14e-99	CE09682	hsp-1	Heat shock 70 kDa protein A	3e-98	P09446	Caenorhabditis elegans	Heat shock 70 kDa protein A	4e-97	7.05793	0.0179723	8.56841	0.00208954	0.313822	0.266188		2.61945	9.14239	2.12886	25.0432	3.43253	1.54806		18.7412	12.5633	52.3906	13.7414	16.9062	6.95993
Mg49438	322					Minc3s02648g31043	IPR000741 Fructose-bisphosphate aldolase2C class-I IPR013785 Aldolase-type TIM barrel IPR029768 Fructose-bisphosphate aldolase class-I active site	3.04e-27	CE01225	aldo-2	Fructose-bisphosphate aldolase 2	1e-26	P53448	Carassius	CARAU Fructose-bisphosphate aldolase C	5e-32	7.03235	0.00960323	7.27582	0.0091733	0.313822	0.266188		4.9727	6.18366	5.85422	13.2446	0.741139	1.22759		5.9508	7.09792	5.68171	7.3584	7.70107	4.03142
Mg22762	1311		NXFT01003141.1.8182_g	IPR002048 EF-hand domain IPR011992 EF-hand domain pair IPR018247 EF-Hand 1 2C calcium-binding site	0.0												6.95305	1.09592e-08	5.99339	4.77594e-08	4.93427	2.72149		489.744	396.737	287.118	167.806	12.6149	13.7258		239.02	217.515	144.455	117.997	39.5649	35.4084
Mg13387	1882		NXFT01003769.1.9799_g		2.21e-92												6.95141	0.000933435	5.71406	0.00313586	4.64847	2.2882		336.782	461.829	55.2151	133.59	2.48263	5.71413		192.122	146.465	82.176	34.3088	8.05511	5.2865
Mg3878	1087		NXFT01001244.1.3170_g	IPR036691 Endonuclease/exonuclease/phosphatase superfamily	0.0	Minc3s04044g35342	IPR005135 Endonuclease/exonuclease/phosphatase IPR036691 Endonuclease/exonuclease/phosphatase superfamily	6.97e-130	CE35275			6e-37	Q9GUC9	Caenorhabditis elegans	Uncharacterized protein F14F9.5	9e-36	6.94639	6.38561e-09	6.27435	2.38394e-08	1.981	1.34941		132.049	219.213	28.2063	26.2231	10.0818	8.27787		122.485	97.2768	23.2822	15.8691	5.22278	6.54157
Mg53061	559					Minc3s01930g27271	IPR001593 Ribosomal protein S3Ae IPR018281 Ribosomal protein S3Ae2C conserved site IPR027500 40S ribosomal protein S1/32C eukaryotes	1.40e-48	CE00664	rps-1	40S ribosomal protein S3a	2e-39	Q42262	Arabidopsis thaliana	40S ribosomal protein S3a-2	5e-59	6.92677	0.0295739	6.42948	0.0497162	0.313822	0.266188		9.67922	0.266188	27.275	4.98562	1.21609	0.907123		3.10849	4.36523	4.32783	1.68463	2.39044	5.2865
Mg27791	1285		NXFT01000368.1.9666_g	IPR001563 Peptidase S10 2C serine carboxypeptidase IPR002018 Carboxylesterase 2C type B IPR018202 Serine carboxypeptidase 2C serine active site IPR019819 Carboxylesterase type B 2C conserved site IPR019826 Carboxylesterase type B 2C active site IPR029058 Alpha/Beta hydrolase fold IPR033124 Serine carboxypeptidases 2C histidine active site	0.0	Minc3s01057g20287	IPR001563 Peptidase S102C serine carboxypeptidase IPR018202 Serine carboxypeptidase2C serine active site IPR029058 Alpha/Beta hydrolase fold	4.05e-141	CE02733		Uncharacterized serine carboxypeptidase F41C3.5	2e-105	Q54TH9	Dictyostelium discoideum	Rho GTPase-activating protein gacY	3e-104	6.91724	0.00146119	6.67448	0.00253409	0.599623	0.362475		37.9183	18.0186	6.78555	25.0432	15.148	3.47086		21.5835	26.2268	8.38948	10.9045	1.32831	8.63337
Mg49699	412					Minc3s00142g05894	IPR002119 Histone H2A IPR007125 Histone H2A/H2B/H3 IPR009072 Histone-fold IPR032454 Histone H2A2C C-terminal domain IPR032458 Histone H2A conserved site	2.28e-53	CE05477	his-35	Histone H2A	1e-30	P02273	Tetrahymena pyriformis	TETPY Histone H2A.X	3e-36	6.91252	0.00751628	7.33474	0.00633244	0.361455	0.266188		9.67922	6.18366	8.64823	21.5037	0.899456	0.266188		5.9508	15.296	11.0972	11.6137	2.39044	1.93962
Mg12162	840	SP	NXFT01001934.1.4997_g		0.0	Minc3s03854g34991		3.67e-27									6.89301	0.00173709	6.09019	0.00414942	4.57702	1.34941		308.543	337.562	24.481	80.4966	2.95758	2.18899		203.491	166.96	35.4671	20.1244	4.16065	3.61306
Mg34719	360																6.86868	0.0332661	6.89362	0.0398176	0.337639	0.266188		12.0325	0.266188	17.0303	9.70506	0.266188	0.266188		3.10849	9.83061	7.0356	3.8123	2.0364	4.03142
Mg27652	122																6.86809	6.79888e-05	3.88372	0.00975477	0.69489	0.843906		30.8585	91.987	9.57957	7.34534	3.43253	11.1621		7.37195	8.46427	5.00477	12.323	3.09852	4.03142
Mg25167	944		NXFT01001010.1.240_g		0.0												6.86346	5.63521e-06	6.7208	9.45824e-06	0.909241	0.723548		61.4509	71.2758	2.12886	9.70506	0.899456	0.907123		52.8488	67.2172	5.68171	5.93996	0.974272	3.61306
Mg603	392		NXFT01001286.1.3291_g		7.42e-86												6.86279	0.00650139	5.33056	0.0327188	0.480539	0.362475		16.739	23.9361	5.85422	7.34534	0.582822	0.586656		3.10849	11.197	16.5128	1.68463	1.68236	4.86814
Mg21930	210		NXFT01001934.1.4997_g		5.11e-55												6.86247	0.000422217	5.74553	0.0014761	3.07657	0.940193		228.532	180.749	24.481	40.3814	1.53272	1.22759		115.38	74.0489	12.4511	10.9045	1.68236	5.70486
Mg65781	1093																6.82331	0.00606851	6.19385	0.0131018	0.742524	0.266188		28.5053	29.8535	30.069	49.8203	4.0658	7.31647		8.7931	28.9595	21.9283	25.0889	21.1547	15.7455
Mg17139	1484					Minc3s00109g04813	IPR000194 ATPase2C F1/V1/A1 complex2C alpha/beta subunit2C nucleotide-binding domain IPR003593 AAA+ ATPase domain IPR004100 ATPase2C F1/V1/A1 complex2C alpha/beta subunit2C N-terminal domain IPR005722 ATP synthase2C F1 complex2C beta subunit IPR020003 ATPase2C alpha/beta subunit2C nucleotide-binding domain2C active site IPR024034 ATPase2C F1/V1 complex2C beta/alpha subunit2C C-terminal IPR027417 …	0.0	CE29950	atp-2	ATP synthase subunit beta, mitochondrial	0.0	P10719	Rattus norvegicus	ATP synthase subunit beta, mitochondrial	0.0	6.72541	0.0314794	6.57361	0.0401171	0.742524	0.266188		16.739	38.7297	14.2363	59.2591	2.48263	10.2007		18.7412	30.3258	38.1749	40.6918	19.0304	17.0006
Mg28092	568																6.70012	0.0296167	6.76842	0.0338912	0.409089	0.266188		9.67922	9.14239	5.85422	10.8849	0.899456	2.82993		0.266188	19.395	7.0356	8.77685	9.82532	3.1947
Mg46613	424																6.70011	0.0273112	6.55476	0.0361346	0.409089	0.266188		9.67922	9.14239	7.71689	26.2231	0.582822	1.54806		3.10849	13.9297	0.266188	5.93996	5.22278	8.63337
Mg30237	605		NXFT01000328.1.8619_g	IPR033438 Modulator of levamisole receptor-1 IPR036375 Hemopexin-like domain superfamily	0.0	Minc3s00885g18492	IPR033438 Modulator of levamisole receptor-1	1.96e-110	CE47557			2e-11					6.68047	3.1474e-10	5.46351	1.76513e-09	2.29061	2.38449		249.712	177.79	740.68	454.512	208.77	227.478		102.589	82.247	340.09	347.785	77.4473	73.0607
Mg33869	432					Minc3s03763g34731	IPR001141 Ribosomal protein L27e IPR008991 Translation protein SH3-like domain superfamily IPR038655 Ribosomal protein L27e superfamily IPR041991 Eukaryotic Ribosomal Protein L272C KOW domain	5.03e-23	CE19381	rpl-27	60S ribosomal protein L27	6e-17	P0DJ19	Tetrahymena thermophila	TETTH 60S ribosomal protein L27	7e-28	6.63651	0.00479239	6.12719	0.00987405	0.55199	0.266188		14.3857	18.0186	9.57957	23.8634	0.266188	0.907123		11.6354	11.197	9.74336	14.4506	9.47128	8.63337
Mg51473	761					Minc3s00109g04813	IPR000194 ATPase2C F1/V1/A1 complex2C alpha/beta subunit2C nucleotide-binding domain IPR003593 AAA+ ATPase domain IPR004100 ATPase2C F1/V1/A1 complex2C alpha/beta subunit2C N-terminal domain IPR005722 ATP synthase2C F1 complex2C beta subunit IPR020003 ATPase2C alpha/beta subunit2C nucleotide-binding domain2C active site IPR024034 ATPase2C F1/V1 complex2C beta/alpha subunit2C C-terminal IPR027417 …	3.54e-148	CE29950	atp-2	ATP synthase subunit beta, mitochondrial	5e-147	P14115	Mus musculus	60S ribosomal protein L27a	3e-147	6.56012	0.003467	7.02049	0.00201282	0.456722	0.266188		9.67922	12.1011	16.0989	34.4821	1.21609	5.39367		8.7931	20.7614	12.4511	22.9613	11.5955	9.47009
Mg43946	883																6.54541	0.0342044	6.47899	0.0422436	0.790157	0.266188		28.5053	23.9361	22.6183	52.18	2.48263	10.5211		11.6354	38.5239	24.6361	44.9471	9.82532	14.4904
Mg28368	337																6.53921	0.0490208	8.18354	0.0199775	0.290005	0.266188		2.61945	3.22492	7.71689	3.80577	0.741139	0.586656		4.52965	12.5633	4.32783	3.10307	3.45257	1.93962
Mg38896	765		NXFT01000006.1.1388_g		0.0	Minc3s00490g13210		3.11e-22									6.52785	2.93151e-05	4.62076	0.000786791	0.69489	0.60319		35.5651	38.7297	17.0303	16.7842	3.11589	3.15039		14.4777	5.73157	7.71254	11.6137	4.51469	6.54157
Mg14029	1135		NXFT01000770.1.1877_g		0.0												6.48965	7.82764e-05	5.69264	0.000222837	3.71962	3.08256		282.657	284.305	82.2239	219.72	12.2983	27.5059		162.278	164.228	154.609	105.231	19.3845	24.531
Mg22716	213																6.48516	5.59824e-10	6.52398	6.60721e-10	1.71901	2.16784		155.581	148.203	154.868	157.187	18.9476	24.3012		185.016	127.336	132.27	99.5572	32.484	34.1533
Mg3891	1162		NXFT01003052.1.685_g		3.72e-103												6.47375	7.2284e-05	4.11183	0.00367607	1.29031	0.916121		52.0379	100.863	4.92288	13.2446	0.741139	1.22759		23.0046	7.09792	2.97395	4.52152	1.32831	3.1947
Mg26273	188		NXFT01000999.1.32_g		1.53e-94												6.46777	2.971e-06	6.27283	5.04365e-06	0.861608	0.579119		44.9781	38.7297	9.57957	7.34534	1.05777	1.86853		47.1642	26.2268	23.9591	24.3797	5.57682	4.86814
Mg43714	726												Q8N0N3	Penaeus	PENMO Beta-1,3-glucan-binding protein	7e-55	6.43282	0.0198439	6.43135	0.013386	0.361455	0.266188		0.266188	12.1011	13.3049	8.5252	2.16599	9.88021		3.10849	8.46427	8.38948	22.2521	19.3845	19.9291
Mg7492	2033		NXFT01001395.1.3590_g	IPR001096 Peptidase C13 2C legumain	0.0	Minc3s00264g08930	IPR001096 Peptidase C132C legumain	9.94e-149	CE14367			1e-98	O89017	Mus musculus	Legumain	5e-93	6.42895	4.63581e-11	6.09487	8.46325e-11	21.9156	18.8976		1842.87	1630.53	1094.59	1372.44	56.9437	72.3713		1405.79	1350.22	934.444	665.516	84.5282	81.8462
Mg51819	414																6.41988	0.0207763	6.60722	0.00765567	0.361455	0.266188		0.266188	12.1011	26.3436	33.3022	1.53272	5.39367		5.9508	7.09792	5.68171	15.8691	36.3785	18.674
Mg27422	723	SP	NXFT01002632.1.6952_g		0.0												6.33888	0.000370486	6.385	0.0004438	0.837791	0.60319		52.0379	23.9361	28.2063	36.8418	1.69104	0.266188		59.9546	19.395	11.0972	8.77685	0.266188	0.266188
Mg18869	948		NXFT01002256.1.5960_g		0.0												6.33489	0.000122781	3.0526	0.0466309	0.718707	0.795763		37.9183	44.6472	12.3736	19.1439	2.00768	3.79133		5.9508	2.99888	9.74336	5.93996	1.32831	1.93962
Mg18522	409		NXFT01001934.1.4997_g		1.06e-44												6.33444	0.00599655	6.04823	0.0100211	3.79107	0.771692		202.646	124.533	17.9616	21.5037	0.899456	2.82993		177.91	91.8114	14.4819	9.48607	3.45257	2.77634
Mg27141	965		NXFT01002250.1.597_g		0.0												6.33163	0.0121856	6.12706	0.0138096	0.599623	0.458761		42.6248	0.266188	166.976	139.49	5.9656	13.0849		23.0046	16.6623	86.2377	64.0961	1.68236	4.86814
Mg16667	983																6.29386	0.0108004	5.21998	0.0350457	0.718707	0.266188		9.67922	29.8535	23.5496	53.3598	0.899456	2.18899		8.7931	9.83061	17.1897	31.4719	15.136	15.7455
Mg28575	985																6.29248	0.000156404	4.80194	0.00175304	0.69489	0.60319		33.2118	29.8535	9.57957	23.8634	1.21609	1.54806		10.2143	12.5633	8.38948	5.23074	2.39044	2.77634
Mg23288	1379		NXFT01003096.1.8066_g	IPR001563 Peptidase S10 2C serine carboxypeptidase IPR029058 Alpha/Beta hydrolase fold	0.0	Minc3s02788g31570	IPR001563 Peptidase S102C serine carboxypeptidase IPR029058 Alpha/Beta hydrolase fold	0.0	CE02733		Uncharacterized serine carboxypeptidase F41C3.5	3e-109	O50017	Zea mays	Poly [ADP-ribose] polymerase 2	6e-108	6.18461	6.0435e-06	6.25655	7.35734e-06	1.07596	1.13277		70.8639	53.5234	18.8929	8.5252	2.79926	5.39367		57.1123	74.0489	19.8975	37.1457	2.39044	8.21501
Mg39903	986																6.17644	0.0464723	6.32506	0.0424909	0.456722	0.266188		4.9727	12.1011	5.85422	39.2015	0.899456	7.63694		3.10849	15.296	7.0356	17.9967	8.05511	7.37829
Mg29147	2040		NXFT01002553.1.6720_g		0.0	Minc3s00172g06709		5.70e-12									6.17118	4.84218e-06	4.26749	0.000156396	2.93367	1.97527		103.81	216.254	7.71689	32.1224	3.74916	3.47086		40.0585	45.3556	15.1589	12.323	5.22278	5.2865
Mg20870	1393		NXFT01003752.1.9736_g	IPR000719 Protein kinase domain IPR011009 Protein kinase-like domain superfamily IPR017441 Protein kinase 2C ATP binding site	0.0	Minc3s04476g36371	IPR000719 Protein kinase domain IPR011009 Protein kinase-like domain superfamily	4.06e-64					Q55GC2	Dictyostelium discoideum	Serine/threonine-protein kinase dst2	3e-12	6.14111	5.51185e-05	4.29101	0.00096451	3.05275	1.92713		110.869	207.378	13.3049	29.7627	0.899456	0.266188		41.4796	46.722	8.38948	6.64918	1.68236	5.70486
Mg37407	656																6.07415	1.74599e-07	6.42966	1.11922e-07	1.45703	1.30127		75.5705	77.1933	15.1676	21.5037	2.16599	3.47086		88.3776	106.841	13.805	8.77685	2.39044	5.2865
Mg29036	1391		NXFT01002345.1.6232_g		0.0	Minc3s00272g09107		4.23e-89									6.05485	0.0023038	5.57244	0.00536413	0.837791	0.60319		33.2118	29.8535	3.0602	4.98562	0.899456	1.54806		28.6892	16.6623	3.65089	4.52152	0.266188	1.93962
Mg21126	968		NXFT01001056.1.2750_g		0.0												6.03559	0.000718454	4.12452	0.0145604	1.12359	0.506904		33.2118	41.6885	11.4422	10.8849	1.21609	2.82993		17.32	2.99888	13.805	8.77685	6.63894	5.2865
Mg53504	665					Minc3s03424g33801	IPR001806 Small GTPase IPR005225 Small GTP-binding protein domain IPR027417 P-loop containing nucleoside triphosphate hydrolase	1.64e-83	CE16905	rab-1		1e-85	P40392	Oryza sativa	Ras-related protein RIC1	6e-88	6.02911	0.0451045	7.9105	0.000771149	0.313822	0.266188		2.61945	3.22492	14.2363	28.5828	1.21609	8.59834		8.7931	11.197	13.805	20.1244	22.2168	7.79665
Mg22967	1103																5.97051	6.15438e-05	5.51317	0.000130301	2.29061	1.49384		124.989	80.152	254.521	148.928	155.733	130.055		106.853	43.9893	163.409	128.635	372.01	274.291
Mg12313	2062		NXFT01000544.1.1245_g	IPR001254 Serine proteases 2C trypsin domain IPR009003 Peptidase S1 2C PA clan IPR018114 Serine proteases 2C trypsin family 2C histidine active site IPR029153 Chondroitin proteoglycan 4	0.0	Minc3s02121g28409	IPR029153 Chondroitin proteoglycan 4	4.26e-68					Q5NTB3	Bos taurus	Coagulation factor XI	2e-14	5.91403	0.00149323	4.83445	0.00838017	0.504356	0.386546		12.0325	12.1011	18.8929	4.98562	3.27421	5.0732		5.9508	5.73157	5.68171	7.3584	12.3036	14.072
Mg29522	808		NXFT01002352.1.6273_g		1.10e-161												5.89182	0.000112126	5.14165	0.000435996	1.07596	0.843906		26.152	59.4409	8.64823	23.8634	9.76521	8.91881		24.4258	26.2268	5.68171	1.68463	5.57682	2.77634
Mg7918	660																5.86155	5.97141e-05	4.36825	0.000886818	1.93336	1.06055		68.5107	77.1933	5.85422	8.5252	1.21609	0.266188		24.4258	27.5931	3.65089	3.10307	3.09852	2.77634
Mg20299	853		NXFT01000541.1.1240_g		0.0												5.86133	0.00299997	5.12067	0.00730739	5.36298	4.76757		221.472	340.521	22.6183	98.1945	0.899456	2.50946		148.066	187.456	59.16	41.401	2.0364	6.12322
Mg9606	1502		NXFT01002307.1.6138_g	IPR008758 Peptidase S28 IPR029058 Alpha/Beta hydrolase fold	0.0	Minc3s02034g27889	IPR008758 Peptidase S28 IPR029058 Alpha/Beta hydrolase fold	8.35e-176	CE00464	pcp-5	Prolyl carboxy peptidase like protein 5	4e-97	Q54NZ8	Dictyostelium discoideum	Isochorismatase family protein 1B	6e-96	5.85896	5.71032e-06	5.45787	1.29155e-05	20.8915	14.5647		955.689	1074.29	153.937	259.835	4.54075	6.67554		834.483	702.568	176.271	117.288	9.82532	18.2556
Mg14861	1129		NXFT01001487.1.3888_g		0.0												5.82596	0.0069674	4.29439	0.045131	1.17123	0.964264		54.3911	38.7297	2.12886	4.98562	1.21609	0.266188		17.32	15.296	1.62007	3.10307	4.16065	0.266188
Mg6582	1014																5.79774	0.00358617	5.31572	0.00710107	4.05305	6.16373		164.994	378.984	44.0391	120.612	1.21609	5.39367		223.387	164.228	65.2525	50.6209	7.34703	8.63337
Mg43546	295																5.79673	0.00971671	5.29565	0.0205712	0.909241	0.506904		33.2118	18.0186	3.99154	4.98562	0.266188	0.907123		11.6354	24.8604	5.00477	1.68463	0.974272	1.10291
Mg37808	509		NXFT01002126.1.5563_g		0.0												5.7735	0.00862741	5.02757	0.0237875	0.599623	0.675405		19.0923	23.9361	2.12886	15.6044	1.05777	1.22759		18.7412	7.09792	2.97395	3.10307	0.974272	1.10291
Mg5730	1556		NXFT01000810.1.190_g	IPR008758 Peptidase S28 IPR029058 Alpha/Beta hydrolase fold	0.0	Minc3s00932g19022	IPR008758 Peptidase S28 IPR029058 Alpha/Beta hydrolase fold	5.81e-165	CE00464	pcp-5	Prolyl carboxy peptidase like protein 5	1e-92	Q20390	Caenorhabditis elegans	Palmitoyl-protein thioesterase 1	2e-91	5.70132	0.000429392	5.39645	0.000789146	46.042	27.0097		1781.68	1994.45	161.388	404.958	7.8654	10.8416		1653.07	1403.5	287.966	174.025	20.4466	22.4392
Mg16100	409																5.65858	0.000341391	4.74432	0.00175304	1.24268	0.723548		47.3314	26.8948	15.1676	16.7842	1.53272	0.907123		28.6892	11.197	1.62007	1.68463	2.39044	5.2865
Mg33181	504		NXFT01001951.1.5040_g		0.0												5.65395	6.06696e-08	4.6469	5.09254e-07	1.74283	2.04749		80.277	86.0695	36.5884	43.921	2.79926	4.1118		48.5854	34.4248	41.5596	31.4719	4.16065	4.86814
Mg18091	853		NXFT01001105.1.2911_g		1.38e-36												5.65381	0.000100548	4.21313	0.00140385	1.93336	2.09563		92.0433	86.0695	6.78555	25.0432	1.05777	0.586656		31.5315	34.4248	8.38948	13.0322	0.266188	1.93962
Mg17057	174																5.5875	0.0209392	6.05483	0.017907	0.361455	0.699477		9.67922	18.0186	1.19753	3.80577	0.899456	1.22759		10.2143	27.5931	2.97395	2.39385	1.68236	3.1947
Mg5375	1184		NXFT01001400.1.3599_g	IPR003280 Two pore domain potassium channel IPR013099 Potassium channel domain	0.0	Minc3s01563g24742	IPR003280 Two pore domain potassium channel IPR013099 Potassium channel domain	3.84e-160	CE37508	twk-7	TWiK family of potassium channels protein 7	7e-11	Q51VY4	Magnaporthe oryzae	MAGO7 Protein YOP1	8e-12	5.58705	0.000155445	3.79521	0.00989811	0.69489	0.916121		40.2716	12.1011	134.379	82.8563	19.4225	20.4556		13.0566	2.99888	57.1292	40.6918	29.2976	14.4904
Mg47590	920		NXFT01002828.1.7385_g	IPR036846 GM2-AP 2C lipid-recognition domain superfamily	0.0	Minc3s02630g30949	IPR036846 GM2-AP2C lipid-recognition domain superfamily	3.76e-159	CE29187			1e-122					5.48711	0.0104651	4.971	0.0174805	0.409089	0.314332		9.67922	0.266188	3.99154	3.80577	48.0779	37.1199		5.9508	1.63253	0.943129	0.266188	5.22278	5.2865
Mg10771	1228		NXFT01003551.1.9274_g	IPR000719 Protein kinase domain IPR011009 Protein kinase-like domain superfamily IPR017441 Protein kinase 2C ATP binding site	0.0	Minc3s01020g19926	IPR000719 Protein kinase domain IPR011009 Protein kinase-like domain superfamily	4.26e-29									5.47223	0.00285931	5.13197	0.00527044	4.24359	5.92301		153.228	278.387	5.85422	40.3814	4.69906	2.18899		180.753	158.762	31.4055	30.7627	8.05511	4.44978
Mg4962	1524		NXFT01002553.1.6718_g		0.0												5.46776	0.000343109	3.26581	0.0192364	1.29031	1.25312		52.0379	38.7297	8.64823	7.34534	1.84936	2.50946		14.4777	5.73157	5.68171	7.3584	2.39044	5.70486
Mg33043	552																5.44787	0.00416768	5.49363	0.00531661	0.69489	1.10869		19.0923	38.7297	0.266188	2.62591	2.16599	0.586656		35.795	23.4941	7.71254	3.8123	0.974272	0.684547
Mg15434	314		NXFT01003964.1.946_g	IPR002110 Ankyrin repeat IPR002641 Patatin-like phospholipase domain IPR016035 Acyl transferase/acyl hydrolase/lysophospholipase IPR020683 Ankyrin repeat-containing domain IPR036770 Ankyrin repeat-containing domain superfamily	4.99e-17	Minc3s03097g32769		2.42e-25									5.43544	0.000937956	5.18928	0.000497373	0.62344	0.410618		19.0923	3.22492	77.5672	36.8418	205.762	196.072		10.2143	9.83061	47.652	63.3869	123.473	118.243
Mg16492	1649		NXFT01001146.1.2992_g		0.0												5.39125	0.00842431	4.31822	0.0353369	1.50466	0.795763		40.2716	35.771	3.99154	1.44605	0.266188	1.22759		8.7931	27.5931	4.32783	3.10307	0.974272	0.684547
Mg19894	439		NXFT01003532.1.9209_g	IPR000719 Protein kinase domain IPR011009 Protein kinase-like domain superfamily	7.58e-156	Minc3s00043g02412	IPR000719 Protein kinase domain IPR011009 Protein kinase-like domain superfamily	3.28e-16									5.33686	0.000343109	4.64594	0.00131632	1.17123	1.20498		54.3911	20.9773	15.1676	12.0648	11.9816	13.7258		10.2143	37.1575	9.74336	37.1457	9.47128	18.674
Mg26546	1069		NXFT01003264.1.8483_g	IPR001841 Zinc finger 2C RING-type IPR013083 Zinc finger 2C RING/FYVE/PHD-type IPR013087 Zinc finger C2H2-type	0.0												5.31983	0.00407683	3.99846	0.0275716	2.02863	1.4457		68.5107	50.5647	0.266188	14.4245	1.53272	1.22759		28.6892	19.395	3.65089	1.68463	0.62023	0.266188
Mg21200	1097	SP	NXFT01004154.1.10807_g		0.0												5.3145	0.00214934	3.9333	0.0187813	1.26649	1.87898		37.9183	68.3171	3.99154	8.5252	0.266188	0.907123		20.1623	20.7614	2.97395	1.68463	0.974272	0.266188
Mg25703	1025		NXFT01002100.1.5424_g	IPR036188 FAD/NAD(P)-binding domain superfamily	0.0	Minc3s00104g04662		4.64e-74									5.27434	0.00483092	4.18074	0.0243412	1.45703	1.13277		42.6248	38.7297	3.99154	13.2446	1.53272	0.907123		27.2681	11.197	3.65089	1.68463	2.39044	0.266188
Mg24945	2204		NXFT01000946.1.2492_g	IPR013120 Male sterility 2C NAD-binding IPR026055 Fatty acyl-CoA reductase IPR033640 Fatty acyl-CoA reductase 2C C-terminal IPR036291 NAD(P)-binding domain superfamily	0.0	Minc3s05733g38736	IPR013120 Male sterility2C NAD-binding IPR026055 Fatty acyl-CoA reductase IPR033640 Fatty acyl-CoA reductase2C C-terminal IPR036291 NAD(P)-binding domain superfamily	0.0	CE20354	fard-1	Fatty acyl-CoA reductase	1e-168	Q9C509	Arabidopsis thaliana	Sphingosine-1-phosphate lyase	6e-108	5.26302	0.0013397	4.55252	0.00493435	0.575806	0.699477		9.67922	20.9773	18.8929	12.0648	7.39045	8.27787		11.6354	7.09792	5.00477	7.3584	4.16065	4.86814
Mg3992	1153	SP_NLS	NXFT01002255.1.5958_g	IPR002227 Tyrosinase copper-binding domain IPR008922 Uncharacterised domain 2C di-copper centre	4.54e-137	Minc3s00366g11095	IPR002227 Tyrosinase copper-binding domain IPR008922 Uncharacterised domain2C di-copper centre IPR015559 Putative tyrosinase-like2C Tyr-3	3.22e-138	CE08574	tyr-4		3e-91	Q19673	Caenorhabditis elegans	Putative tyrosinase-like protein tyr-3	2e-81	5.24858	0.00343974	3.61776	0.0388995	1.74283	1.03648		16.739	71.2758	7.71689	6.16548	2.64094	2.18899		17.32	11.197	8.38948	1.68463	0.974272	2.77634
Mg30464	270		NXFT01001951.1.5040_g		2.32e-84												5.24083	0.000135029	4.41911	0.000704886	1.67138	1.97527		54.3911	65.3583	17.0303	21.5037	0.266188	1.22759		47.1642	20.7614	18.5436	17.2875	3.09852	1.52127
Mg11372	1068		NXFT01001684.1.4341_g	IPR036188 FAD/NAD(P)-binding domain superfamily	0.0	Minc3s00037g02160		1.78e-75									5.23198	3.81531e-09	4.0441	4.79807e-08	10.0311	8.52274		303.836	376.025	56.1465	87.5758	9.92352	10.5211		139.539	158.762	33.4363	35.7273	21.5087	15.7455
Mg6624	2361		NXFT01002640.1.6969_g		0.0												5.22107	0.000135029	4.47763	0.000593407	1.88573	1.92713		33.2118	91.987	2.12886	13.2446	2.48263	2.82993		35.795	38.5239	10.4203	8.06763	3.45257	2.77634
Mg20983	688		NXFT01000085.1.2120_g		4.74e-95												5.20037	0.0012758	6.14198	0.000485527	1.67138	0.819835		37.9183	35.771	9.57957	34.4821	1.84936	0.266188		69.9027	71.3162	30.7285	22.9613	4.51469	3.61306
Mg12092	324		NXFT01003150.1.8210_g	IPR008139 Saposin B type domain IPR011001 Saposin-like	1.49e-171	Minc3s04867g37167	IPR008139 Saposin B type domain IPR011001 Saposin-like	2.22e-47									5.16637	0.00504569	3.96443	0.0205106	4.98191	5.46565		202.646	154.12	256.384	176.065	82.9076	99.9315		52.8488	102.742	91.6532	257.714	68.5963	208.191
Mg16593	1178	SP_NLS	NXFT01000737.1.1775_g		0.0												5.13636	0.00182145	4.29534	0.00670583	1.29031	1.63827		70.8639	12.1011	166.976	146.569	24.8053	29.1083		37.2162	11.197	117.377	101.685	42.7512	58.8365
Mg10053	1148		NXFT01004154.1.10811_g		3.62e-113												5.08891	0.000331664	4.50013	0.000978062	4.88664	2.67335		124.989	115.657	7.71689	36.8418	0.582822	0.586656		108.274	52.1874	32.7593	20.8336	5.93086	5.2865
Mg27675	415																5.07581	6.78696e-06	3.85669	0.00013461	1.76664	2.50485		70.8639	56.4821	38.451	35.662	11.3484	8.91881		37.2162	18.0287	16.5128	31.4719	8.40915	17.0006
Mg5567	1739		NXFT01001468.1.3810_g	IPR011701 Major facilitator superfamily IPR020846 Major facilitator superfamily domain IPR036259 MFS transporter superfamily	0.0	Minc3s00299g09693	IPR011701 Major facilitator superfamily IPR020846 Major facilitator superfamily domain IPR036259 MFS transporter superfamily	0.0	CE18262			8e-73	Q9NRA2	Homo sapiens	Sialin	1e-20	5.00142	5.90885e-07	3.42381	5.14868e-05	2.1239	2.40856		44.9781	86.0695	69.1852	43.921	29.2382	30.0697		24.4258	19.395	37.4979	32.8904	57.267	33.3166
Mg6206	1915		NXFT01001258.1.3197_g		0.0												4.97493	0.000991541	3.73038	0.00593671	12.6985	11.1947		285.01	452.953	14.2363	55.7196	3.27421	5.39367		189.279	121.871	34.7902	17.9967	3.45257	3.1947
Mg7737	980		NXFT01000873.1.2190_g		0.0												4.96574	5.40128e-05	4.3896	0.000164912	6.1013	4.28614		197.94	109.739	78.4986	99.3744	6.28223	13.4054		135.276	72.6825	73.3758	69.0607	20.4466	10.7252
Mg51401	1692		NXFT01003383.1.8869_g	IPR001128 Cytochrome P450 IPR002401 Cytochrome P450 2C E-class 2C group I IPR017972 Cytochrome P450 2C conserved site IPR036396 Cytochrome P450 superfamily	0.0	Minc3s04309g36004	IPR001128 Cytochrome P450 IPR002401 Cytochrome P4502C E-class2C group I IPR017972 Cytochrome P4502C conserved site IPR036396 Cytochrome P450 superfamily	0.0	CE08931	cyp-33C9	Cytochrome P450 family	1e-82	O62671	Canis familiaris	CANFA Cytochrome P450 2C41	2e-52	4.94463	0.0370509	5.78435	0.00151563	0.361455	0.314332		0.266188	6.18366	39.3824	19.1439	8.81531	7.95741		3.10849	7.09792	29.3746	20.1244	6.2849	4.44978
Mg10146	614		NXFT01003803.1.9858_g		0.0												4.91039	0.000346144	3.80077	0.00329309	3.1242	2.50485		66.1574	89.0282	4.92288	17.9641	2.00768	0.907123		48.5854	23.4941	17.8666	4.52152	2.74448	4.03142
Mg13792	1440		NXFT01001833.1.4761_g	IPR000905 Gcp-like domain IPR005829 Sugar transporter 2C conserved site IPR011701 Major facilitator superfamily IPR011989 Armadillo-like helical IPR016024 Armadillo-type fold IPR017861 Kae1/TsaD family IPR020846 Major facilitator superfamily domain IPR036259 MFS transporter superfamily	4.56e-113	Minc3s00386g11426	IPR005828 Major facilitator2C sugar transporter-like IPR005829 Sugar transporter2C conserved site IPR020846 Major facilitator superfamily domain IPR036259 MFS transporter superfamily	0.0	CE19201	hmit-1.1		2e-19	Q9SQV1	Arabidopsis thaliana	DEAD-box ATP-dependent RNA helicase 40	8e-77	4.89167	0.000325941	4.61654	0.000525576	0.933058	1.03648		28.5053	15.0599	44.9704	14.4245	20.0558	12.7644		11.6354	24.8604	11.0972	16.5783	13.0117	31.2248
Mg4077	1382		NXFT01001912.1.4925_g	IPR008758 Peptidase S28	1.16e-148	Minc3s02034g27889	IPR008758 Peptidase S28 IPR029058 Alpha/Beta hydrolase fold	0.0	CE00464	pcp-5	Prolyl carboxy peptidase like protein 5	3e-137	Q09443	Caenorhabditis elegans	Actin-like protein C08B11.6	5e-136	4.82055	1.8371e-08	4.39936	4.79807e-08	18.0097	14.998		405.027	515.086	84.0866	95.8348	33.8294	24.3012		395.347	291.298	122.116	92.465	31.7759	50.8876
Mg7744	741		NXFT01001660.1.4281_g		2.82e-152												4.78995	0.000182599	3.94475	0.00114962	3.21947	2.91406		99.103	56.4821	3.99154	13.2446	1.21609	1.54806		54.27	33.0585	8.38948	13.0322	1.68236	7.37829
Mg31258	465		NXFT01001951.1.5040_g		0.0												4.7302	4.09959e-05	3.95145	0.000253158	2.38588	2.2882		52.0379	59.4409	15.1676	29.7627	0.899456	1.22759		47.1642	18.0287	21.9283	15.1598	1.32831	1.93962
Mg34043	501		NXFT01001034.1.2695_g		5.70e-93												4.7154	0.00228715	4.00905	0.00896466	1.43321	1.15684		28.5053	26.8948	3.99154	4.98562	0.582822	0.907123		23.0046	11.197	12.4511	5.93996	3.80661	5.2865
Mg17830	357		NXFT01001684.1.4341_g	IPR036188 FAD/NAD(P)-binding domain superfamily	6.21e-141	Minc3s00104g04662		2.93e-20									4.63757	0.000330999	3.50497	0.00384001	2.33825	1.97527		44.9781	50.5647	12.3736	10.8849	1.21609	1.54806		24.4258	19.395	2.97395	6.64918	1.68236	0.684547
Mg14050	297		NXFT01001535.1.3985_g		1.44e-131												4.6131	3.82938e-07	3.83457	3.22667e-06	7.00633	5.73044		160.288	139.327	30.069	40.3814	2.16599	3.79133		99.7469	75.4152	13.805	9.48607	5.93086	3.1947
Mg7088	1116		NXFT01003810.1.9874_g	IPR001563 Peptidase S10 2C serine carboxypeptidase IPR018202 Serine carboxypeptidase 2C serine active site IPR029058 Alpha/Beta hydrolase fold	0.0	Minc3s00297g09645	IPR001563 Peptidase S102C serine carboxypeptidase IPR018202 Serine carboxypeptidase2C serine active site IPR029058 Alpha/Beta hydrolase fold	4.17e-147	CE02733		Uncharacterized serine carboxypeptidase F41C3.5	1e-90	P34479	Caenorhabditis elegans	Putative amino acid permease F59B2.2	2e-89	4.60639	0.000819368	3.59211	0.00600947	4.33886	3.53992		82.6302	97.9044	3.0602	25.0432	0.899456	0.907123		38.6373	50.821	5.00477	12.323	0.974272	2.35798
Mg18839	2139		NXFT01001574.1.4095_g	IPR002123 Phospholipid/glycerol acyltransferase IPR022284 Glycerol-3-phosphate O-acyltransferase/Dihydroxyacetone phosphate acyltransferase	4.83e-174	Minc3s00083g03995	IPR002123 Phospholipid/glycerol acyltransferase IPR022284 Glycerol-3-phosphate O-acyltransferase/Dihydroxyacetone phosphate acyltransferase IPR041728 GPAT/DHAPAT2C acyltransferase domain	0.0	CE31115	acl-7	Putative 1-acyl-sn-glycerol-3-phosphate acyltransferase acl-7	4e-82	A7EKT5	Sclerotinia sclerotiorum	SCLS1 NADH-cytochrome b5 reductase 2	3e-70	4.60091	0.00607298	4.11435	0.0145604	0.671073	0.555047		14.3857	3.22492	30.069	10.8849	9.13194	11.1621		7.37195	5.73157	7.0356	10.1953	4.86873	8.63337
Mg4078	1555		NXFT01001560.1.4058_g	IPR008758 Peptidase S28 IPR029058 Alpha/Beta hydrolase fold	0.0	Minc3s00932g19022	IPR008758 Peptidase S28 IPR029058 Alpha/Beta hydrolase fold	1.99e-170	CE00464	pcp-5	Prolyl carboxy peptidase like protein 5	1e-89	Q09443	Caenorhabditis elegans	Actin-like protein C08B11.6	2e-88	4.59506	2.27278e-08	4.30238	4.79807e-08	12.77	9.75039		266.184	266.552	40.3137	53.3598	9.76521	10.8416		250.389	184.723	53.0676	71.8976	9.11724	13.6537
Mg28121	818		NXFT01003745.1.9724_g		2.11e-69												4.59232	0.000582181	3.3173	0.00864272	2.24298	2.19191		44.9781	50.5647	7.71689	19.1439	2.64094	0.907123		25.8469	13.9297	7.71254	8.06763	1.68236	2.77634
Mg18173	765		NXFT01001258.1.3196_g		0.0												4.5882	3.51724e-06	5.57284	5.87285e-07	3.50527	3.20292		106.163	41.6885	15.1676	30.9425	1.53272	2.82993		152.329	143.733	35.4671	31.4719	3.80661	2.77634
Mg11080	1841		NXFT01000388.1.10219_g	IPR001830 Glycosyl transferase 2C family 20	0.0	Minc3s00339g10511	IPR001830 Glycosyl transferase2C family 20	5.03e-152	CE37507	tps-2	Alpha,alpha-trehalose-phosphate synthase [UDP-forming] 2	1e-83	Q04960	Cucumis sativus	CUCSA DnaJ protein homolog	2e-82	4.54731	0.000563887	4.75599	0.000511851	4.45794	2.81778		59.0976	100.863	2.12886	16.7842	1.21609	1.54806		68.4815	115.039	17.8666	12.323	0.974272	1.93962
Mg43283	313		NXFT01004229.1.10992_g	IPR003439 ABC transporter-like IPR003593 AAA+ ATPase domain IPR011527 ABC transporter type 1 2C transmembrane domain IPR017871 ABC transporter 2C conserved site IPR027417 P-loop containing nucleoside triphosphate hydrolase IPR036640 ABC transporter type 1 2C transmembrane domain superfamily IPR039421 Type I protein exporter	7.87e-55												4.53211	0.000684073	3.90449	0.00154208	0.456722	0.60319		9.67922	3.22492	75.7046	66.3383	21.7973	23.9808		4.52965	4.36523	53.0676	35.018	48.4159	31.2248
Mg8437	572		NXFT01003745.1.9724_g		0.0												4.50244	0.00639723	3.50513	0.0240023	23.035	17.5496		348.548	562.426	23.5496	74.5973	0.899456	2.18899		253.231	202.485	43.5904	35.7273	2.74448	10.7252
Mg24367	598					Minc3s00295g09620	IPR036908 RlpA-like domain superfamily	2.18e-52									4.50135	0.0024411	6.31051	0.000247276	2.38588	0.699477		23.7988	35.771	2.12886	0.266188	1.84936	4.1118		116.801	89.0787	13.805	7.3584	1.68236	2.77634
Mg3766	2175		NXFT01002541.1.6702_g	IPR000834 Peptidase M14 2C carboxypeptidase A IPR003146 Carboxypeptidase 2C activation peptide IPR017853 Glycoside hydrolase superfamily IPR034223 Insect gut carboxypeptidase-like 2C carboxypeptidase domain IPR036990 Metallocarboxypeptidase-like 2C propeptide	8.77e-127	Minc3s03820g34903	IPR017853 Glycoside hydrolase superfamily	1.03e-42									4.49226	1.7671e-07	3.73861	1.45229e-06	5.91076	6.40444		127.342	139.327	25.4123	34.4821	5.33233	7.63694		86.9565	71.3162	28.0208	16.5783	8.05511	8.21501
Mg15143	1799		NXFT01003795.1.9849_g	IPR003663 Sugar/inositol transporter IPR005828 Major facilitator 2C sugar transporter-like IPR005829 Sugar transporter 2C conserved site IPR020846 Major facilitator superfamily domain IPR036259 MFS transporter superfamily	0.0	Minc3s04230g35793	IPR003663 Sugar/inositol transporter IPR005828 Major facilitator2C sugar transporter-like IPR005829 Sugar transporter2C conserved site IPR020846 Major facilitator superfamily domain IPR036259 MFS transporter superfamily	0.0	CE27184	fgt-1	Facilitated glucose transporter protein 1	7e-33	P35685	Oryza sativa	60S ribosomal protein L7a	2e-97	4.4917	6.72878e-07	3.24198	3.18483e-05	2.5526	3.22699		70.8639	47.6059	74.7732	71.0577	36.3625	38.7223		15.8989	34.4248	38.8518	32.8904	24.341	27.8779
Mg3113	2708		NXFT01000999.1.46_g		0.0	Minc3s04941g37306		2.15e-29									4.47668	2.52787e-06	3.90128	1.20949e-05	3.60054	3.08256		61.4509	77.1933	31.9317	53.3598	5.9656	3.47086		59.9546	33.0585	39.5287	36.4365	15.49	12.3986
Mg460	2309		NXFT01000999.1.42_g		0.0	Minc3s00029g01778		3.06e-11									4.44108	0.0121192	3.58289	0.04037	4.74374	5.41751		117.929	91.987	0.266188	16.7842	0.582822	0.907123		61.3757	54.92	13.1281	5.23074	2.39044	3.61306
Mg620	854		NXFT01003769.1.9799_g		0.0												4.43321	0.00141432	3.97712	0.00360871	7.00633	4.912		94.3965	154.12	17.9616	92.2952	1.84936	1.54806		92.6411	87.7124	36.144	24.3797	6.63894	5.2865
Mg4650	1407		NXFT01002233.1.5940_g	IPR001304 C-type lectin-like IPR016186 C-type lectin-like/link domain superfamily IPR016187 C-type lectin fold IPR018378 C-type lectin 2C conserved site	0.0	Minc3s00134g05648	IPR001304 C-type lectin-like IPR016186 C-type lectin-like/link domain superfamily IPR016187 C-type lectin fold IPR018378 C-type lectin2C conserved site	2.93e-81									4.40668	0.00139213	4.12539	0.00286506	32.3474	20.0771		525.043	577.219	49.6271	63.9786	1.21609	0.266188		544.568	362.348	70.668	27.9258	5.57682	6.95993
Mg8972	662		NXFT01004063.1.10638_g	IPR002486 Nematode cuticle collagen 2C N-terminal IPR008160 Collagen triple helix repeat	4.75e-65												4.37313	0.014284	4.84661	0.00291341	1.02832	0.964264		23.7988	6.18366	540.442	331.807	433.105	395.402		8.7931	34.4248	254.119	278.281	665.157	816.066
Mg12283	1667		NXFT01002387.1.6324_g		0.0	Minc3s00009g00583		6.46e-50									4.31726	0.00196799	3.45148	0.0121482	3.24328	1.59013		30.8585	56.4821	2.12886	7.34534	1.84936	2.18899		24.4258	23.4941	3.65089	2.39385	2.0364	2.77634
Mg12152	922		NXFT01004256.1.11037_g	IPR003675 CAAX prenyl protease 2 IPR039731 CAAX prenyl protease 2 2C eukaryotes	0.0												4.31535	4.36468e-06	3.75801	2.10513e-05	9.76908	5.99522		153.228	151.162	7.71689	27.4029	2.48263	2.50946		112.537	94.5441	32.0824	28.6351	7.70107	9.88845
Mg9263	1047		NXFT01003453.1.9017_g	IPR003903 Ubiquitin interacting motif	6.22e-26												4.29981	9.01874e-05	3.57618	0.000562073	3.57672	2.88999		61.4509	56.4821	17.0303	13.2446	6.12392	2.18899		38.6373	33.0585	6.35865	10.1953	8.40915	4.86814
Mg17910	868		NXFT01002041.1.5301_g		1.58e-135												4.29041	0.00148037	3.07371	0.0152228	5.50588	7.0303		80.277	157.079	3.99154	21.5037	1.84936	0.586656		38.6373	63.1181	13.805	8.77685	2.39044	4.44978
Mg13433	1325		NXFT01000706.1.1691_g		1.39e-167												4.29018	0.00337065	3.09168	0.0277105	4.93427	4.67129		49.6846	130.451	16.0989	30.9425	1.69104	0.266188		25.8469	52.1874	11.7742	4.52152	1.32831	2.35798
Mg3717	1205		NXFT01002056.1.509_g		6.28e-121												4.20369	0.000370738	2.34733	0.0338912	3.21947	2.19191		52.0379	38.7297	17.0303	17.9641	1.05777	1.22759		8.7931	16.6623	15.1589	8.77685	1.68236	1.93962
Mg13236	1018		NXFT01002960.1.7771_g	IPR001547 Glycoside hydrolase 2C family 5 IPR017853 Glycoside hydrolase superfamily	0.0	Minc3s01357g23087	IPR001547 Glycoside hydrolase2C family 5 IPR017853 Glycoside hydrolase superfamily IPR018087 Glycoside hydrolase2C family 52C conserved site	1.56e-123					P06566	Bacillus sp. (strain	BACS4 Endoglucanase A	4e-48	4.17506	0.000522636	2.75832	0.027734	0.76634	1.18091		14.3857	12.1011	73.8419	109.993	17.0478	40.6451		5.9508	4.36523	29.3746	41.401	16.5521	28.7146
Mg8663	1534		NXFT01001021.1.2644_g	IPR006103 Glycoside hydrolase family 2 2C catalytic domain IPR017853 Glycoside hydrolase superfamily	0.0	Minc3s00694g16191		1.74e-76									4.1569	0.0210629	4.04572	0.030778	50.1861	10.2078		466.211	603.848	29.1377	79.3167	1.53272	1.86853		531.777	457.992	80.8221	64.0961	6.63894	9.05173
Mg17065	1631		NXFT01002672.1.7045_g	IPR000743 Glycoside hydrolase 2C family 28 IPR006626 Parallel beta-helix repeat IPR011050 Pectin lyase fold/virulence factor IPR012334 Pectin lyase fold	0.0	Minc3s00007g00481	IPR000743 Glycoside hydrolase2C family 28 IPR003961 Fibronectin type III IPR011050 Pectin lyase fold/virulence factor IPR012334 Pectin lyase fold IPR013783 Immunoglobulin-like fold IPR024535 Pectate lyase superfamily protein IPR036116 Fibronectin type III superfamily	4.04e-170					P15922	Erwinia	ERWCH Exo-poly-alpha-D-galacturonosidase	2e-94	4.14322	0.00325413	4.1527	0.00414917	3.29092	4.62314		52.0379	80.152	6.78555	20.3238	0.266188	0.266188		51.4277	80.8806	9.74336	20.8336	1.68236	7.79665
Mg45846	247		NXFT01002735.1.7146_g		3.89e-12												4.07464	0.00188578	3.24103	0.0123115	3.38618	2.43263		42.6248	47.6059	9.57957	13.2446	0.266188	0.907123		28.6892	22.1277	7.0356	6.64918	2.0364	2.77634
Mg1809	312		NXFT01003492.1.9104_g		4.04e-162	Minc3s00613g15147		8.36e-11									4.06704	5.93263e-05	4.09122	7.13096e-05	13.294	12.8797		134.402	299.098	13.3049	36.8418	0.741139	1.22759		221.966	216.149	46.2982	36.4365	2.39044	1.93962
Mg4768	1604		NXFT01000857.1.2158_g		0.0	Minc3s00419g12018	IPR007594 RFT1	9.50e-11									4.06326	3.17453e-05	4.74573	7.89518e-06	4.79137	3.70842		82.6302	50.5647	23.5496	48.6404	2.64094	6.996		109.695	105.475	38.8518	55.5855	8.05511	6.95993
Mg19218	1356		NXFT01003552.1.9275_g	IPR001079 Galectin 2C carbohydrate recognition domain IPR013320 Concanavalin A-like lectin/glucanase domain superfamily	0.0												4.05372	4.70009e-05	4.15811	3.91159e-05	4.02924	3.25106		42.6248	71.2758	11.4422	15.6044	0.899456	2.18899		55.6911	65.8508	21.9283	41.401	2.74448	2.77634
Mg1383	2430		NXFT01001574.1.4094_g		0.0	Minc3s01037g20083		0.0									4.0527	1.27646e-09	2.27838	1.11659e-06	13.8417	10.7855		176.761	225.13	620.537	593.735	411.257	395.082		58.5334	59.0191	491.048	517.998	959.012	762.098
Mg8312	749		NXFT01001815.1.4675_g		0.0												4.04219	0.000427091	3.09088	0.00482718	3.2671	2.81778		44.9781	47.6059	14.2363	27.4029	4.69906	4.75273		30.1104	18.0287	8.38948	11.6137	7.34703	2.35798
Mg10987	1509		NXFT01001351.1.367_g		0.0	Minc3s00009g00583		3.94e-30									4.02877	0.0333839	4.24339	0.0318773	1.67138	0.74762		16.739	15.0599	4.92288	7.34534	1.21609	1.54806		21.5835	15.296	2.29701	7.3584	1.32831	1.10291
Mg23846	591		NXFT01003524.1.9193_g	IPR001623 DnaJ domain IPR018253 DnaJ domain 2C conserved site IPR036869 Chaperone J-domain superfamily	6.78e-93												4.01105	0.00495647	3.3721	0.0182359	2.48115	1.27719		42.6248	9.14239	18.8929	17.9641	57.4186	29.1083		27.2681	7.09792	6.35865	2.39385	13.3657	9.05173
Mg5402	1870		NXFT01000676.1.1610_g	IPR000169 Cysteine peptidase 2C cysteine active site IPR000668 Peptidase C1A 2C papain C-terminal IPR013128 Peptidase C1A IPR025660 Cysteine peptidase 2C histidine active site IPR025661 Cysteine peptidase 2C asparagine active site IPR038765 Papain-like cysteine peptidase superfamily	0.0	Minc3s01581g24877	IPR000169 Cysteine peptidase2C cysteine active site IPR000668 Peptidase C1A2C papain C-terminal IPR025660 Cysteine peptidase2C histidine active site IPR025661 Cysteine peptidase2C asparagine active site IPR038765 Papain-like cysteine peptidase superfamily	1.23e-92	CE07251	cpr-4	Cathepsin B-like cysteine proteinase 4	1e-42	P43157	Schistosoma japonicum	SCHJA Cathepsin B-like cysteine proteinase	2e-46	3.97042	3.22629e-08	3.24719	3.08238e-07	16.1282	13.9388		261.478	201.46	491.081	375.461	166.182	157.936		160.856	120.505	364.46	346.366	666.219	423.227
Mg13239	2161		NXFT01001775.1.4558_g	IPR002486 Nematode cuticle collagen 2C N-terminal IPR008160 Collagen triple helix repeat	2.98e-161	Minc3s01033g20047	IPR002486 Nematode cuticle collagen2C N-terminal	2.86e-18									3.96583	0.0184026	4.64358	0.0098642	4.64847	3.25106		75.5705	38.7297	4022.71	2265.6	2228.1	2465.3		37.2162	147.832	1568.06	1799.56	5542.44	4404.33
Mg11872	623																3.87712	4.72089e-05	4.19265	2.52717e-05	7.12542	4.83979		52.0379	118.616	11.4422	10.8849	1.69104	1.86853		123.906	86.346	10.4203	16.5783	2.39044	0.684547
Mg1484	2208		NXFT01002652.1.6998_g	IPR002213 UDP-glucuronosyl/UDP-glucosyltransferase	2.32e-172	Minc3s00295g09611	IPR002213 UDP-glucuronosyl/UDP-glucosyltransferase	1.31e-42									3.86655	0.000660559	2.32976	0.0315831	4.00542	5.32122		49.6846	80.152	11.4422	17.9641	5.80728	7.31647		14.4777	30.3258	3.65089	14.4506	6.2849	5.70486
Mg16579	352		NXFT01002646.1.6981_g		8.38e-100												3.80514	0.00200391	3.35203	0.00570278	11.1266	6.45258		63.8042	177.79	26.3436	27.4029	0.266188	0.907123		94.0622	80.8806	16.5128	11.6137	1.32831	3.61306
Mg7206	1255	SP	NXFT01003861.1.10044_g	IPR000719 Protein kinase domain IPR011009 Protein kinase-like domain superfamily IPR017441 Protein kinase 2C ATP binding site	0.0	Minc3s05624g38548	IPR000719 Protein kinase domain IPR011009 Protein kinase-like domain superfamily IPR017441 Protein kinase2C ATP binding site	5.13e-42	CE27670	pak-1	Serine\/threonine-protein kinase pak-1	4e-12	P27075	Candida tropicalis	CANTR 60S ribosomal protein L44	1e-10	3.7953	0.000192379	2.81513	0.00248074	12.9843	10.2559		139.108	177.79	15.1676	32.1224	3.11589	0.907123		74.1661	86.346	20.5744	8.06763	6.2849	6.54157
Mg12318	417																3.77104	0.00524829	3.44156	0.0123115	4.86282	2.55299		47.3314	47.6059	23.5496	22.6835	0.266188	0.586656		34.3738	41.2566	10.4203	5.23074	0.266188	2.35798
Mg4681	603		NXFT01003647.1.9528_g	IPR004898 Pectate lyase PlyH/PlyE-like IPR011050 Pectin lyase fold/virulence factor IPR012334 Pectin lyase fold	0.0	Minc3s00697g16237	IPR004898 Pectate lyase PlyH/PlyE-like IPR011050 Pectin lyase fold/virulence factor IPR012334 Pectin lyase fold	1.20e-68					A1C4B8	Aspergillus clavatus	ASPCL Probable pectate lyase E	6e-23	3.74683	0.0074391	3.67313	0.0111518	4.57702	2.4567		37.9183	50.5647	2.12886	3.80577	0.582822	0.266188		34.3738	49.4547	7.0356	3.10307	1.68236	0.266188
Mg8060	1696		NXFT01001684.1.4341_g	IPR036188 FAD/NAD(P)-binding domain superfamily	0.0	Minc3s03229g33213		2.48e-30									3.7232	0.00377237	3.04402	0.0177968	3.17183	2.72149		47.3314	23.9361	3.99154	8.5252	1.69104	1.54806		18.7412	26.2268	12.4511	8.06763	0.974272	2.35798
Mg5960	2317		NXFT01001684.1.4342_g	IPR019129 Folate-sensitive fragile site protein Fra10Ac1	0.0	Minc3s00050g02709	IPR019129 Folate-sensitive fragile site protein Fra10Ac1	1.01e-104	CE42939			2e-48	Q8BP78	Mus musculus	Protein FRA10AC1 homolog	1e-58	3.72241	1.19967e-07	3.03297	1.16253e-06	34.729	36.9753		463.858	476.622	80.3612	111.173	24.3304	32.6334		302.972	280.367	94.3609	56.2947	35.6704	27.4595
Mg4459	1310		NXFT01002614.1.6905_g		0.0	Minc3s05466g38293		4.08e-20									3.68458	8.46184e-05	2.31346	0.00594925	10.7456	8.61903		141.462	100.863	28.2063	32.1224	0.582822	2.18899		59.9546	34.4248	15.1589	8.77685	0.62023	1.10291
Mg26099	1012		NXFT01003232.1.742_g	IPR000719 Protein kinase domain IPR011009 Protein kinase-like domain superfamily	0.0	Minc3s00043g02412	IPR000719 Protein kinase domain IPR011009 Protein kinase-like domain superfamily	1.87e-180	CE03499			3e-55	Q5AQL1	Emericella nidulans	EMENI Alanyl-tRNA synthetase	3e-56	3.66236	0.0115954	4.1616	0.005608	1.40939	1.27719		21.4455	6.18366	16.0989	7.34534	5.9656	6.0346		23.0046	16.6623	3.65089	5.93996	6.99299	12.3986
Mg11171	1280		NXFT01001684.1.4341_g	IPR036188 FAD/NAD(P)-binding domain superfamily	0.0	Minc3s03229g33213		1.63e-45									3.63744	0.000144465	2.32095	0.00775602	6.6729	6.13965		70.8639	83.1108	11.4422	34.4821	2.64094	1.86853		37.2162	24.8604	13.1281	12.323	4.16065	3.1947
Mg464	1082		NXFT01003885.1.10137_g		0.0	Minc3s00056g02892	IPR000352 Peptide chain release factor class I/class II IPR019438 Queuosine salvage protein family	3.55e-58	CE45582			8e-25	O02108	Caenorhabditis elegans	Probable Hsp90 co-chaperone cdc37	6e-12	3.63719	0.000788364	3.41484	0.00160715	220.929	98.7671		1880.52	2092.09	157.662	206.742	8.34035	10.5211		1898.93	1505.98	381.384	250.621	32.13	45.449
Mg4811	320		NXFT01003885.1.10137_g		3.72e-58												3.60843	0.00176869	3.5087	0.00300343	94.39	42.3915		734.483	929.309	45.9017	82.8563	2.32431	4.1118		825.956	725.796	171.532	127.217	13.7198	22.0209
Mg10155	355																3.60162	0.00480238	3.8675	0.00461177	22.13	10.641		136.755	257.676	31.0003	65.1584	3.43253	6.35507		277.391	194.287	66.6064	33.5996	12.6577	10.7252
Mg6023	2154		NXFT01004037.1.10554_g		0.0												3.58948	1.61819e-05	2.12432	0.00252276	19.4625	12.8556		150.875	234.006	41.2451	56.8994	3.59084	2.18899		94.0622	45.3556	27.3438	20.1244	4.51469	6.54157
Mg32557	282	SP	NXFT01001848.1.4801_g	IPR004988 Protein of unknown function DUF273	2.67e-19												3.58269	0.000967596	5.5266	1.31283e-05	1.95718	1.13277		19.0923	12.1011	2.12886	1.44605	6.28223	5.0732		48.5854	71.3162	3.65089	5.23074	20.0925	33.3166
Mg4965	675	SP	NXFT01000694.1.1649_g		2.70e-117												3.56922	0.0148578	3.25625	0.0285441	13.7465	9.34117		89.69	180.749	9.57957	21.5037	0.899456	0.266188		104.01	112.307	32.0824	19.4152	0.266188	2.77634
Mg3883	4705		NXFT01001827.1.4696_g	IPR001478 PDZ domain IPR008144 Guanylate kinase-like domain IPR008145 Guanylate kinase/L-type calcium channel beta subunit IPR027417 P-loop containing nucleoside triphosphate hydrolase IPR036034 PDZ superfamily	0.0	Minc3s00015g01017	IPR001478 PDZ domain IPR008144 Guanylate kinase-like domain IPR008145 Guanylate kinase/L-type calcium channel beta subunit IPR027417 P-loop containing nucleoside triphosphate hydrolase IPR036034 PDZ superfamily	0.0	CE46988	zoo-1		5e-106	O97758	Canis familiaris	CANFA Tight junction protein ZO-1	6e-51	3.55507	0.000165991	3.3228	0.000347425	83.9821	85.2148		760.369	1225.18	131.585	253.936	78.9497	63.3983		901.277	787.282	334.675	200.976	104.709	90.2134
Mg7057	459		NXFT01000210.1.5538_g		4.81e-148												3.54384	9.5153e-07	3.58313	1.16253e-06	44.2558	33.3887		397.967	503.251	60.8031	108.813	5.64897	5.39367		447.929	477.121	163.409	187.501	16.9062	28.7146
Mg5503	2486		NXFT01004081.1.10687_g	IPR000109 Proton-dependent oligopeptide transporter family IPR000795 Transcription factor 2C GTP-binding domain IPR005225 Small GTP-binding protein domain IPR018456 PTR2 family proton/oligopeptide symporter 2C conserved site IPR020846 Major facilitator superfamily domain IPR027417 P-loop containing nucleoside triphosphate hydrolase IPR036259 MFS transporter superfamily	0.0	Minc3s03165g33004	IPR000109 Proton-dependent oligopeptide transporter family IPR018456 PTR2 family proton/oligopeptide symporter2C conserved site IPR020846 Major facilitator superfamily domain IPR036259 MFS transporter superfamily	0.0	CE25039	pept-1	Peptide transporter family 1	1e-139	Q21219	Caenorhabditis elegans	Peptide transporter family 1	2e-138	3.48787	5.63245e-05	2.97687	0.000283043	17.2714	9.29303		139.108	154.12	12.3736	27.4029	17.0478	8.91881		113.958	91.8114	34.7902	22.9613	7.70107	8.21501
Mg8286	2530		NXFT01000999.1.23_g		0.0	Minc3s01112g20831		0.0									3.47142	3.19882e-06	2.92668	1.42703e-05	2.19535	2.33634		21.4455	23.9361	65.4598	78.1369	48.7112	49.2977		14.4777	16.6623	30.0516	32.8904	68.2423	63.0201
Mg7304	1760		NXFT01002041.1.5298_g	IPR002048 EF-hand domain IPR011992 EF-hand domain pair IPR018247 EF-Hand 1 2C calcium-binding site	0.0	Minc3s00077g03765	IPR002048 EF-hand domain IPR011992 EF-hand domain pair IPR018247 EF-Hand 12C calcium-binding site	3.63e-69									3.4661	1.86714e-07	2.8799	1.69653e-06	17.4857	18.7291		176.761	219.213	204.229	173.705	25.7552	26.5445		159.435	104.109	139.716	108.068	42.3972	31.2248
Mg5942	156		NXFT01003033.1.7967_g		2.83e-51												3.44217	5.59487e-05	3.87971	2.52618e-05	18.5336	14.1073		157.934	192.584	8.64823	21.5037	0.741139	0.907123		258.916	214.783	32.7593	26.5074	0.974272	3.61306
Mg6503	144		NXFT01003885.1.10137_g		7.44e-32												3.39112	0.00339113	2.72735	0.0145604	38.3016	11.4835		294.423	222.171	17.9616	22.6835	1.69104	0.907123		173.647	153.297	36.821	55.5855	2.39044	4.03142
Mg34634	535																3.36178	0.0431457	3.6936	0.0299856	2.62405	1.75863		33.2118	6.18366	20.7556	26.2231	0.266188	2.18899		27.2681	23.4941	21.9283	21.5428	4.51469	3.61306
Mg15533	2950		NXFT01001941.1.5010_g	IPR000719 Protein kinase domain IPR002350 Kazal domain IPR003533 Doublecortin domain IPR008271 Serine/threonine-protein kinase 2C active site IPR011009 Protein kinase-like domain superfamily IPR036058 Kazal domain superfamily IPR036572 Doublecortin domain superfamily	0.0	Minc3s01637g25262	IPR002350 Kazal domain IPR036058 Kazal domain superfamily	0.0	CE44426			2e-23					3.29129	0.00259432	2.68909	0.00864272	1.69519	1.18091		16.739	6.18366	43.1077	17.9641	62.6431	63.3983		5.9508	9.83061	30.7285	40.6918	105.417	149.62
Mg2985	1525		NXFT01003764.1.9784_g		5.83e-162												3.28873	2.92469e-05	2.56622	0.000347425	22.6301	19.4031		179.114	228.089	28.2063	68.698	7.54877	10.8416		145.224	101.376	26.6669	27.2166	7.34703	11.9802
Mg11408	242		NXFT01003033.1.7967_g		6.06e-45												3.28663	1.9375e-05	3.50605	1.20949e-05	17.6048	11.628		127.342	154.12	4.92288	9.70506	1.37441	0.586656		175.068	151.931	34.1132	22.9613	2.74448	5.2865
Mg11004	339					Minc3s00575g14493	IPR000719 Protein kinase domain IPR011009 Protein kinase-like domain superfamily	1.96e-54									3.28449	0.0106187	3.18815	0.0148768	2.2668	1.6142		23.7988	9.14239	22.6183	15.6044	5.0157	6.0346		20.1623	11.197	11.0972	8.06763	4.16065	4.44978
Mg13755	1165		NXFT01000053.1.1212_g		0.0												3.23866	0.00890487	3.05384	0.0161489	4.69611	3.20292		40.2716	29.8535	9.57957	9.70506	0.582822	0.266188		34.3738	27.5931	2.97395	5.23074	0.974272	2.35798
Mg2080	173		NXFT01003033.1.7967_g		8.45e-87												3.21312	0.00258318	3.85282	0.00140822	57.8789	45.7615		480.331	476.622	16.0989	55.7196	1.21609	2.18899		840.167	650.647	74.7297	64.0961	4.51469	7.79665
Mg12608	5926		NXFT01003686.1.9616_g	IPR002049 Laminin EGF domain IPR008211 Laminin 2C N-terminal IPR008979 Galactose-binding-like domain superfamily IPR038684 Laminin 2C N-terminal domain superfamily	0.0	Minc3s00041g02332	IPR000034 Laminin IV IPR000742 EGF-like domain IPR002049 Laminin EGF domain IPR008211 Laminin2C N-terminal IPR038684 Laminin2C N-terminal domain superfamily	0.0	CE31067	lam-3		0.0	P25391	Homo sapiens	Laminin subunit alpha-1	0.0	3.20543	9.35083e-06	2.59477	7.74017e-05	3.38618	6.81366		42.6248	47.6059	142.761	120.612	264.814	237.412		31.5315	27.5931	100.453	89.6281	156.753	122.009
Mg9673	2715	SP	NXFT01003891.1.10146_g	IPR001590 Peptidase M12B 2C ADAM/reprolysin IPR024079 Metallopeptidase 2C catalytic domain superfamily IPR041645 ADAM cysteine-rich domain 2	0.0	Minc3s00704g16328	IPR000884 Thrombospondin type-1 (TSP1) repeat IPR001590 Peptidase M12B2C ADAM/reprolysin IPR024079 Metallopeptidase2C catalytic domain superfamily IPR036383 Thrombospondin type-1 (TSP1) repeat superfamily IPR041645 ADAM cysteine-rich domain 2	0.0	CE47865	adt-2	A disintegrin and metalloproteinase with thrombospondin motifs adt-2	0.0	P36573	Caenorhabditis elegans	32 kDa beta-galactoside-binding lectin	8e-31	3.19825	0.000395109	2.10875	0.01632	2.6955	1.99934		28.5053	9.14239	133.447	131.231	40.637	43.5293		5.9508	12.5633	105.869	67.6422	48.7699	38.3369
Mg10269	1282	SP	NXFT01003671.1.9590_g		1.37e-157	Minc3s00046g02509		4.88e-34									3.13526	0.0150546	3.60829	0.00689809	5.88695	4.93607		54.3911	35.771	569.314	406.138	3844.36	2731.93		31.5315	94.5441	293.381	291.047	1997.42	1250.32
Mg12972	946		NXFT01000891.1.2277_g	IPR002076 ELO family	0.0	Minc3s00209g07606	IPR002076 ELO family	2.47e-125	CE10284			8e-50	P55857	Oryza sativa	Small ubiquitin-related modifier 1	6e-27	3.07306	4.19603e-06	2.79823	5.23489e-06	3.52909	3.17885		28.5053	23.9361	300.157	200.842	175.206	161.782		20.1623	23.4941	114.669	147.075	197.114	209.446
Mg7755	417		NXFT01000312.1.8191_g		0.0												3.07225	1.45297e-05	2.76744	4.47627e-05	45.2561	29.5372		230.885	396.737	220.993	141.849	465.718	478.083		256.074	250.308	133.623	137.855	525.31	395.197
Mg7388	320		NXFT01003596.1.824_g		3.54e-93												3.02161	0.00199432	2.79772	0.00437391	6.50618	8.04131		35.5651	80.152	12.3736	29.7627	1.37441	2.82993		52.8488	45.3556	20.5744	13.7414	6.2849	3.1947
Mg17098	462	SP_NLS	NXFT01000810.1.188_g		8.17e-141												2.99902	0.0213425	2.72629	0.0415762	9.38801	7.15066		37.9183	91.987	2.12886	20.3238	1.21609	0.907123		59.9546	46.722	11.0972	5.93996	2.74448	1.10291
Mg1953	464																2.96398	2.9416e-05	3.30405	1.63102e-05	101.821	85.4074		670.945	787.29	79.4299	160.727	2.48263	3.79133		949.596	895.223	315.721	233.6	23.987	30.388
Mg24874	1329		NXFT01002553.1.6721_g		0.0												2.96184	0.0226936	3.87803	0.00235118	1.19504	1.30127		9.67922	6.18366	15.1676	8.5252	3.11589	3.79133		17.32	12.5633	15.1589	12.323	15.844	21.1841
Mg40555	2473		NXFT01002023.1.5218_g	IPR012336 Thioredoxin-like fold IPR036282 Glutathione S-transferase 2C C-terminal domain superfamily	0.0	Minc3s00593g14819	IPR012336 Thioredoxin-like fold	8.98e-58									2.94433	0.0390149	3.72706	0.00378644	1.43321	2.02341		21.4455	0.266188	29.1377	19.1439	22.7472	18.2124		24.4258	15.296	46.2982	27.2166	69.3044	67.622
Mg8612	1553		NXFT01003979.1.10409_g		0.0	Minc3s00138g05793	IPR013783 Immunoglobulin-like fold IPR014756 Immunoglobulin E-set IPR032640 AMP-activated protein kinase2C glycogen-binding domain	8.46e-162									2.89844	7.31602e-05	2.03967	0.00217197	13.5559	8.40238		63.8042	97.9044	81.2926	122.972	71.5088	73.3328		59.9546	28.9595	84.8838	79.699	130.554	104.019
Mg14295	910		NXFT01003496.1.9127_g	IPR001128 Cytochrome P450 IPR002401 Cytochrome P450 2C E-class 2C group I IPR017972 Cytochrome P450 2C conserved site IPR036396 Cytochrome P450 superfamily	1.61e-155	Minc3s00167g06594	IPR001128 Cytochrome P450 IPR002401 Cytochrome P4502C E-class2C group I IPR036396 Cytochrome P450 superfamily	1.08e-39									2.87513	0.0125615	3.09427	0.00627975	1.69519	2.07156		9.67922	15.0599	16.0989	27.4029	17.6811	11.803		14.4777	13.9297	11.0972	14.4506	13.0117	6.95993
Mg16362	7151		NXFT01004232.1.10373_g	IPR000884 Thrombospondin type-1 (TSP1) repeat IPR001590 Peptidase M12B 2C ADAM/reprolysin IPR002870 Peptidase M12B 2C propeptide IPR010294 ADAM-TS Spacer 1 IPR012314 Peptidase M12B 2C GON-ADAMTSs IPR013273 ADAMTS/ADAMTS-like IPR024079 Metallopeptidase 2C catalytic domain superfamily IPR036383 Thrombospondin type-1 (TSP1) repeat superfamily IPR041645 ADAM cysteine-rich domain 2	0.0	Minc3s00193g07193	IPR000884 Thrombospondin type-1 (TSP1) repeat IPR001590 Peptidase M12B2C ADAM/reprolysin IPR010294 ADAM-TS Spacer 1 IPR012314 Peptidase M12B2C GON-ADAMTSs IPR013273 ADAMTS/ADAMTS-like IPR024079 Metallopeptidase2C catalytic domain superfamily IPR036383 Thrombospondin type-1 (TSP1) repeat superfamily IPR041645 ADAM cysteine-rich domain 2	0.0	CE42668	gon-1	A disintegrin and metalloproteinase with thrombospondin motifs gon-1	0.0	Q54Z69	Dictyostelium discoideum	60S ribosomal protein L4	0.0	2.87375	5.90885e-07	2.33141	6.75983e-06	14.6277	14.9739		101.456	112.698	197.71	150.108	328.616	282.598		78.4296	68.5835	111.961	88.2097	150.026	109.458
Mg15783	1901		NXFT01004006.1.10338_g	IPR001650 Helicase 2C C-terminal IPR011545 DEAD/DEAH box helicase domain IPR014001 Helicase superfamily 1/2 2C ATP-binding domain IPR014014 RNA helicase 2C DEAD-box type 2C Q motif IPR027417 P-loop containing nucleoside triphosphate hydrolase	0.0	Minc3s03194g33104	IPR011545 DEAD/DEAH box helicase domain IPR014001 Helicase superfamily 1/22C ATP-binding domain IPR027417 P-loop containing nucleoside triphosphate hydrolase	1.62e-67	CE38657	laf-1	ATP-dependent RNA helicase laf-1	1e-49	A1CH78	Aspergillus clavatus	ASPCL ATP-dependent RNA helicase ded1	3e-42	2.85731	0.00176869	2.23001	0.0137767	4.98191	5.89894		42.6248	32.8123	27.275	38.0217	5.0157	9.55974		21.5835	27.5931	19.8975	10.1953	4.51469	5.70486
Mg18512	1379		NXFT01002657.1.7013_g	IPR001841 Zinc finger 2C RING-type IPR013083 Zinc finger 2C RING/FYVE/PHD-type	0.0	Minc3s06058g39254	IPR001841 Zinc finger2C RING-type IPR013083 Zinc finger2C RING/FYVE/PHD-type	1.99e-20									2.85015	0.000100564	2.83118	5.46988e-05	4.81519	3.53992		37.9183	18.0186	139.036	124.151	18.3143	23.6603		34.3738	22.1277	108.577	87.5004	51.6023	47.5408
Mg13532	565	SP															2.8456	0.000341391	2.05516	0.005608	11.6982	9.96703		92.0433	59.4409	154.868	69.8779	88.9237	58.5913		50.0065	38.5239	63.2217	71.1883	67.8882	41.2654
Mg25332	2831		NXFT01001352.1.371_g	IPR001507 Zona pellucida domain	0.0	Minc3s00060g03110	IPR001507 Zona pellucida domain	0.0	CE46375	dpy-1		4e-31	Q03755	Caenorhabditis elegans	Cuticlin-1	3e-12	2.82807	2.66447e-05	2.11374	0.000409397	4.17214	4.35836		35.5651	20.9773	601.91	601.994	201.012	207.929		11.6354	23.4941	548.588	442.111	527.081	370.514
Mg4342	1402		NXFT01001012.1.2620_g	IPR000536 Nuclear hormone receptor 2C ligand-binding domain IPR001628 Zinc finger 2C nuclear hormone receptor-type IPR013088 Zinc finger 2C NHR/GATA-type IPR035500 Nuclear hormone receptor-like domain superfamily	0.0	Minc3s04563g36551	IPR000536 Nuclear hormone receptor2C ligand-binding domain IPR001628 Zinc finger2C nuclear hormone receptor-type IPR013088 Zinc finger2C NHR/GATA-type IPR035500 Nuclear hormone receptor-like domain superfamily	1.03e-124	CE40924	nhr-129		3e-11					2.73417	0.00890447	2.22626	0.0369362	7.31595	5.20086		33.2118	47.6059	13.3049	22.6835	1.69104	2.18899		42.9008	13.9297	12.4511	7.3584	5.93086	4.86814
Mg1183	315		NXFT01003481.1.9087_g		1.64e-81												2.67911	0.000173236	3.37398	3.69413e-05	76.2655	49.0111		414.44	384.902	88.7433	111.173	18.3143	39.3632		665.366	628.786	206.056	188.919	34.9623	46.704
Mg622	504		NXFT01001453.1.3747_g		4.76e-44												2.64337	0.000919828	2.57311	0.00140822	26.7504	12.6871		110.869	133.409	14.2363	17.9641	0.582822	1.22759		128.17	104.109	28.6977	16.5783	1.68236	4.03142
Mg10072	1077		NXFT01003248.1.8456_g		8.60e-179	Minc3s01155g21230		6.49e-86	CE11212			1e-44					2.59885	4.77253e-05	3.28751	4.50738e-06	16.8188	11.3632		101.456	65.3583	531.129	301.13	557.384	565.25		135.276	135.534	357.014	383.955	1221	1202.63
Mg3593	2762		NXFT01000802.1.2055_g	IPR029033 Histidine phosphatase superfamily	0.0	Minc3s00271g09100	IPR000560 Histidine phosphatase superfamily2C clade-2 IPR029033 Histidine phosphatase superfamily IPR033379 Histidine acid phosphatase active site	0.0	CE13607	pho-14		6e-49	P24638	Mus musculus	Lysosomal acid phosphatase	1e-35	2.52382	5.6045e-07	2.14507	3.92252e-06	37.5632	36.518		233.239	189.625	372.801	297.591	191.671	168.832		186.437	139.634	313.69	269.77	325.631	278.475
Mg1483	951		NXFT01002742.1.7197_g	IPR002048 EF-hand domain IPR011992 EF-hand domain pair IPR018247 EF-Hand 1 2C calcium-binding site	0.0	Minc3s01909g27122	IPR002048 EF-hand domain IPR011992 EF-hand domain pair IPR018247 EF-Hand 12C calcium-binding site IPR028846 Recoverin family	7.98e-139	CE24845	ncs-1	Neuronal calcium sensor 1	6e-115	P36608	Caenorhabditis elegans	Neuronal calcium sensor 1	1e-113	2.37757	5.50364e-05	2.37915	5.93713e-05	30.3944	20.4382		148.521	112.698	48.6958	45.1008	7.8654	4.1118		128.17	134.168	59.16	52.0394	31.4219	31.6431
Mg6600	1378		NXFT01000331.1.8710_g	IPR004843 Calcineurin-like phosphoesterase domain 2C ApaH type	0.0	Minc3s00383g11373	IPR004843 Calcineurin-like phosphoesterase domain2C ApaH type IPR029052 Metallo-dependent phosphatase-like	8.84e-63	CE09190			1e-21	Q12287	Saccharomyces cerevisiae	Cytochrome c oxidase copper chaperone	1e-21	2.18136	0.00430782	3.13984	0.000201474	17.1046	9.38932		75.5705	41.6885	9.57957	12.0648	0.741139	0.907123		92.6411	136.901	23.2822	44.2379	4.16065	7.37829
Mg8464	1441		NXFT01000999.1.33_g	IPR000276 G protein-coupled receptor 2C rhodopsin-like IPR000611 Neuropeptide Y receptor family IPR017452 GPCR 2C rhodopsin-like 2C 7TM	0.0	Minc3s00123g05270	IPR000276 G protein-coupled receptor2C rhodopsin-like IPR009126 Cholecystokinin receptor IPR017452 GPCR2C rhodopsin-like2C 7TM	0.0	CE38443	ckr-2		1e-109	P70031	Xenopus laevis	Cholecystokinin receptor	5e-37	2.17527	0.0104917	2.24123	0.00969983	12.0793	6.98216		42.6248	41.6885	18.8929	9.70506	2.16599	1.22759		42.9008	45.3556	24.6361	21.5428	5.93086	11.1435
Mg6042	1829		NXFT01001538.1.3995_g		0.0	Minc3s00381g11350	IPR002213 UDP-glucuronosyl/UDP-glucosyltransferase	6.90e-44									2.16394	0.0235842	2.39738	0.0149332	16.152	13.9629		42.6248	91.987	5.85422	33.3022	1.37441	1.22759		77.0084	79.5143	20.5744	18.7059	4.16065	5.2865
Mg14653	1211		NXFT01001921.1.4955_g	IPR002076 ELO family IPR030457 ELO family 2C conserved site	0.0	Minc3s00483g13114	IPR002076 ELO family IPR030457 ELO family2C conserved site	9.26e-137	CE05979	elo-1	Elongation of very long chain fatty acids protein	1e-89	P38166	Saccharomyces cerevisiae	Protein transport protein SFT2	2e-38	2.05942	0.000648773	2.35228	5.14868e-05	5.69641	5.41751		26.152	18.0186	195.847	177.245	97.1562	75.2556		20.1623	34.4248	86.2377	97.4295	102.938	94.397
Mg16717	1027	SP	NXFT01004006.1.10338_g	IPR001650 Helicase 2C C-terminal IPR011545 DEAD/DEAH box helicase domain IPR014001 Helicase superfamily 1/2 2C ATP-binding domain IPR014014 RNA helicase 2C DEAD-box type 2C Q motif IPR027417 P-loop containing nucleoside triphosphate hydrolase	0.0	Minc3s00155g06274	IPR001650 Helicase2C C-terminal IPR027417 P-loop containing nucleoside triphosphate hydrolase	6.58e-34	CE22474			7e-21	Q5B0J9	Emericella nidulans	EMENI ATP-dependent RNA helicase dbp2	2e-20	2.05848	0.00549927	2.04959	0.00594925	7.26832	9.75039		30.8585	38.7297	44.0391	34.4821	4.0658	6.0346		37.2162	31.6922	15.8358	10.9045	10.5334	11.1435
Mg2974	255	SP	NXFT01000312.1.8191_g		3.68e-77												2.0028	0.039626	2.8279	0.00452223	11.8888	9.05231		16.739	68.3171	21.687	27.4029	79.583	118.198		79.8507	65.8508	28.6977	22.9613	124.181	64.6935
Mg579	2440		NXFT01000570.1.1290_g	IPR013083 Zinc finger 2C RING/FYVE/PHD-type	0.0	Minc3s00457g12628	IPR001841 Zinc finger2C RING-type IPR013083 Zinc finger2C RING/FYVE/PHD-type	4.29e-74									-2.00462	0.000250651	-2.29542	7.13096e-05	337.559	281.88		80.277	74.2345	122.271	100.554	71.1922	76.217		38.6373	87.7124	78.7913	79.699	38.1487	41.2654
Mg1313	2396		NXFT01002454.1.6494_g	IPR000089 Biotin/lipoyl attachment IPR002930 Glycine cleavage system H-protein IPR003016 2-oxo acid dehydrogenase 2C lipoyl-binding site IPR006028 Gamma-aminobutyric acid A receptor/Glycine receptor alpha IPR006029 Neurotransmitter-gated ion-channel transmembrane domain IPR006201 Neurotransmitter-gated ion-channel IPR006202 Neurotransmitter-gated ion-channel ligand-binding domain IPR011053 Single…	0.0	Minc3s00213g07675	IPR006028 Gamma-aminobutyric acid A receptor/Glycine receptor alpha IPR006029 Neurotransmitter-gated ion-channel transmembrane domain IPR006201 Neurotransmitter-gated ion-channel IPR006202 Neurotransmitter-gated ion-channel ligand-binding domain IPR018000 Neurotransmitter-gated ion-channel2C conserved site IPR036719 Neurotransmitter-gated ion-channel transmembrane domain superfamily IPR036734 Neu…	0.0	CE28083	unc-49		2e-147	Q21432	Caenorhabditis elegans	Zinc metalloproteinase nas-11	3e-85	-2.05251	0.0285659	-2.6177	0.00699877	56.9025	54.355		9.67922	18.0186	9.57957	12.0648	14.3564	13.4054		4.52965	13.9297	11.7742	21.5428	9.11724	10.7252
Mg2646	622		NXFT01002910.1.7483_g	IPR029058 Alpha/Beta hydrolase fold	0.0	Minc3s02137g28504	IPR029058 Alpha/Beta hydrolase fold	6.62e-131					Q66HA6	Rattus norvegicus	ADP-ribosylation factor-like protein 8B	3e-43	-2.08187	0.0128484	-2.03276	0.0107455	41.5168	50.1184		4.9727	18.0186	11.4422	14.4245	30.5047	25.2626		8.7931	13.9297	23.2822	19.4152	46.9997	42.9388
Mg762	1078		NXFT01001767.1.4481_g	IPR000749 ATP:guanido phosphotransferase IPR014746 Glutamine synthetase/guanido kinase 2C catalytic domain IPR022413 ATP:guanido phosphotransferase 2C N-terminal IPR022414 ATP:guanido phosphotransferase 2C catalytic domain IPR022415 ATP:guanido phosphotransferase active site IPR036802 ATP:guanido phosphotransferase 2C N-terminal domain superfamily	4.33e-122	Minc3s01693g25655	IPR000749 ATP:guanido phosphotransferase IPR014746 Glutamine synthetase/guanido kinase2C catalytic domain IPR022413 ATP:guanido phosphotransferase2C N-terminal IPR022414 ATP:guanido phosphotransferase2C catalytic domain IPR036802 ATP:guanido phosphotransferase2C N-terminal domain superfamily	3.79e-54	CE33098		Probable arginine kinase F46H5.3	2e-43	Q10454	Caenorhabditis elegans	Probable arginine kinase F46H5.3	4e-42	-2.13664	9.18932e-05	-2.36133	3.24608e-05	293.022	201.649		59.0976	53.5234	86.8806	55.7196	146.234	108.905		48.5854	48.0883	68.6372	76.8621	114.268	144.6
Mg1419	2532		NXFT01002672.1.7057_g	IPR006368 GDP-mannose 4 2C6-dehydratase IPR016040 NAD(P)-binding domain IPR036291 NAD(P)-binding domain superfamily	0.0	Minc3s02681g31164	IPR006368 GDP-mannose 42C6-dehydratase IPR016040 NAD(P)-binding domain IPR036291 NAD(P)-binding domain superfamily	0.0	CE27116	bre-1	GDP-mannose 4,6 dehydratase 1	1e-157	A8Y0L5	Caenorhabditis briggsae	CAEBR GDP-mannose 4,6 dehydratase 1	1e-157	-2.24722	3.06331e-05	-2.23309	2.8305e-05	300.238	277.571		54.3911	68.3171	29.1377	46.2807	132.461	96.4064		67.0604	56.2864	86.9146	105.231	48.0619	42.9388
Mg598	1900		NXFT01000722.1.1732_g	IPR003598 Immunoglobulin subtype 2 IPR003599 Immunoglobulin subtype IPR007110 Immunoglobulin-like domain IPR010939 Titin repeats IPR013083 Zinc finger 2C RING/FYVE/PHD-type IPR013098 Immunoglobulin I-set IPR013783 Immunoglobulin-like fold IPR036179 Immunoglobulin-like domain superfamily	0.0	Minc3s00197g07295	IPR003598 Immunoglobulin subtype 2 IPR003599 Immunoglobulin subtype IPR010939 Titin repeats IPR013098 Immunoglobulin I-set IPR013783 Immunoglobulin-like fold IPR036179 Immunoglobulin-like domain superfamily	0.0	CE30078			2e-128	Q8WZ42	Homo sapiens	Titin	3e-40	-2.27155	0.0122179	-2.05537	0.0193259	174.081	121.13		47.3314	12.1011	33.7944	15.6044	61.0599	40.6451		28.6892	42.6229	48.329	58.4224	39.5649	38.3369
Mg46	1560		NXFT01002434.1.6438_g	IPR002999 Tudor domain IPR004087 K Homology domain IPR004088 K Homology domain 2C type 1 IPR008632 Nematode fatty acid retinoid binding IPR033104 A-kinase anchor protein 1 2C mitochondrial IPR035437 SNase-like 2C OB-fold superfamily IPR036612 K Homology domain 2C type 1 superfamily	9.08e-46	Minc3s00096g04440	IPR008632 Nematode fatty acid retinoid binding	5.13e-14									-2.29819	0.00572718	-2.19446	0.00502268	51.0197	38.9251		12.0325	6.18366	21.687	10.8849	51.2443	41.9269		10.2143	9.83061	17.8666	27.9258	39.2108	39.1736
Mg1965	641		NXFT01000511.1.1189_g	IPR001107 Band 7 domain IPR001972 Stomatin family IPR018080 Band 7/stomatin-like 2C conserved site IPR028522 Protein Unc-1 IPR036013 Band 7/SPFH domain superfamily	0.0	Minc3s01940g27327	IPR001107 Band 7 domain IPR001972 Stomatin family IPR018080 Band 7/stomatin-like2C conserved site IPR028522 Protein Unc-1 IPR036013 Band 7/SPFH domain superfamily	4.38e-156	CE28585	unc-1	Protein unc-1	3e-134	Q21190	Caenorhabditis elegans	Protein unc-1	5e-133	-2.39566	0.000967595	-2.35439	0.000930709	130.734	125.414		35.5651	12.1011	11.4422	9.70506	17.6811	19.1738		17.32	33.0585	34.7902	27.2166	24.341	25.3677
Mg1065	502		NXFT01003332.1.8699_g	IPR001781 Zinc finger 2C LIM-type	1.27e-69	Minc3s05943g39071	IPR001781 Zinc finger2C LIM-type	2.41e-42	CE31590	mlp-1		1e-27	P53777	Drosophila melanogaster	Muscle LIM protein 1	1e-22	-2.39878	8.64709e-05	-2.04106	0.0002774	244.817	224.782		26.152	65.3583	48.6958	45.1008	162.383	130.376		47.1642	67.2172	79.4682	80.4082	94.7954	89.3767
Mg616	411		NXFT01001530.1.414_g		9.88e-100	Minc3s00198g07337		1.85e-30									-2.40089	0.000411243	-2.45623	0.00027873	145.263	130.927		28.5053	23.9361	10.5109	13.2446	1.69104	1.86853		27.2681	23.4941	15.8358	28.6351	10.1794	16.1638
Mg9161	4357		NXFT01002206.1.5849_g	IPR026767 Transmembrane protein 151	0.0	Minc3s00119g05136	IPR026767 Transmembrane protein 151	4.91e-100	CE31139		Transmembrane protein 151 homolog	3e-96	Q23387	Caenorhabditis elegans	Transmembrane protein 151 homolog	4e-95	-2.40887	0.000902505	-2.438	0.000395452	42.4695	41.2119		9.67922	6.18366	6.78555	6.16548	117.421	109.546		7.37195	8.46427	10.4203	8.77685	15.49	21.1841
Mg5251	1728		NXFT01002290.1.6074_g	IPR002293 Amino acid/polyamine transporter I	0.0	Minc3s03396g33727	IPR002293 Amino acid/polyamine transporter I	4.92e-136	CE42501	aat-6		1e-95	Q8BGK6	Mus musculus	Y+L amino acid transporter 2	1e-30	-2.50252	0.00673509	-3.25495	0.00100483	69.5253	64.8743		12.0325	12.1011	44.9704	22.6835	40.0037	28.7878		11.6354	2.99888	16.5128	31.4719	28.2355	30.8064
Mg3395	1275		NXFT01000657.1.1528_g	IPR000210 BTB/POZ domain IPR011333 SKP1/BTB/POZ domain superfamily	0.0	Minc3s01611g25089	IPR000210 BTB/POZ domain IPR011333 SKP1/BTB/POZ domain superfamily	7.39e-43	CE00124	bath-42	BTB and MATH domain-containing protein 42	3e-12	Q6EEF3	Chlorocebus aethiops	CHLAE Tubulin polyglutamylase TTLL5	5e-11	-2.50959	0.0195762	-3.55123	0.00286632	68.8108	63.0449		16.739	6.18366	4.92288	9.70506	7.39045	5.39367		7.37195	4.36523	6.35865	17.2875	7.34703	4.86814
Mg418	700					Minc3s07318g40984	IPR002048 EF-hand domain IPR011992 EF-hand domain pair IPR018247 EF-Hand 12C calcium-binding site	7.63e-27	CE20542	mlc-2	Myosin regulatory light chain 2	1e-15	P19626	Caenorhabditis elegans	Myosin regulatory light chain 2	2e-14	-2.54092	2.01113e-05	-2.22126	6.87762e-05	485.985	483.07		92.0433	74.2345	44.0391	51.0001	63.9096	57.9503		64.218	143.733	128.885	124.38	76.3852	75.1525
Mg1593	2116		NXFT01001474.1.3862_g		0.0	Minc3s00062g03168	IPR001828 Receptor2C ligand binding region IPR002455 GPCR family 32C GABA-B receptor IPR017978 GPCR family 32C C-terminal IPR028082 Periplasmic binding protein-like I	0.0	CE43384	gbb-2	Gamma-aminobutyric acid type B receptor subunit 2	2e-103	Q9V3C0	Drosophila melanogaster	ATP-dependent RNA helicase abstrakt	3e-50	-2.56559	0.000768293	-2.04013	0.00238677	47.3281	61.8894		9.67922	9.14239	12.3736	12.0648	24.647	25.2626		10.2143	16.6623	30.0516	32.1812	30.0057	34.99
Mg516	3609		NXFT01003573.1.9344_g	IPR003020 Bicarbonate transporter 2C eukaryotic IPR011531 Bicarbonate transporter 2C C-terminal IPR013769 Band 3 cytoplasmic domain IPR016152 Phosphotransferase/anion transporter	0.0	Minc3s00014g00873	IPR003020 Bicarbonate transporter2C eukaryotic IPR011531 Bicarbonate transporter2C C-terminal IPR013769 Band 3 cytoplasmic domain IPR016152 Phosphotransferase/anion transporter	0.0	CE27167	abts-1	Anion exchange protein	1e-154	A5A761	Sus scrofa	PIG Sideroflexin-1	2e-158	-2.5763	0.00463691	-2.04527	0.0132136	71.7403	89.8125		4.9727	23.9361	21.687	14.4245	32.4045	22.6989		18.7412	20.7614	44.9443	29.3443	22.2168	36.2451
Mg2696	2040		NXFT01002751.1.7231_g		1.24e-15	Minc3s00136g05714	IPR017853 Glycoside hydrolase superfamily	7.30e-53	CE06004	lys-5	Lysozyme-like protein 5	2e-12	Q54BQ8	Dictyostelium discoideum	Probable GH family 25 lysozyme 4	2e-19	-2.60695	0.023955	-2.69333	0.0194828	96.7003	83.602		9.67922	20.9773	2.12886	0.266188	0.266188	0.266188		10.2143	18.0287	2.97395	8.77685	0.974272	2.35798
Mg275	6615		NXFT01003839.1.9972_g	IPR003598 Immunoglobulin subtype 2 IPR003599 Immunoglobulin subtype IPR003961 Fibronectin type III IPR007110 Immunoglobulin-like domain IPR013098 Immunoglobulin I-set IPR013783 Immunoglobulin-like fold IPR036116 Fibronectin type III superfamily IPR036179 Immunoglobulin-like domain superfamily	0.0	Minc3s03487g33986	IPR003598 Immunoglobulin subtype 2 IPR003599 Immunoglobulin subtype IPR003961 Fibronectin type III IPR007110 Immunoglobulin-like domain IPR013098 Immunoglobulin I-set IPR013783 Immunoglobulin-like fold IPR036116 Fibronectin type III superfamily IPR036179 Immunoglobulin-like domain superfamily	0.0	CE36727			1e-173	Q9I7U4	Drosophila melanogaster	Titin	2e-28	-2.61669	0.00541282	-2.3823	0.00955989	352.731	250.899		59.0976	38.7297	68.2539	26.2231	47.7613	22.058		58.5334	57.6527	77.4374	83.2451	78.5095	73.479
Mg2825	2690		NXFT01003634.1.9491_g	IPR000175 Sodium:neurotransmitter symporter IPR037272 Sodium:neurotransmitter symporter superfamily	0.0	Minc3s00745g16799	IPR000175 Sodium:neurotransmitter symporter IPR037272 Sodium:neurotransmitter symporter superfamily	0.0	CE30176	snf-3	Sodium- and chloride-dependent betaine transporter	0.0	Q2UKV4	Aspergillus oryzae	ASPOR Pyruvate decarboxylase	1e-133	-2.63272	0.000105597	-2.14024	0.000353476	91.0319	105.748		14.3857	18.0186	16.0989	14.4245	18.3143	15.0077		18.7412	26.2268	46.9751	42.8195	29.2976	22.0209
Mg4679	1646		NXFT01002429.1.635_g	IPR001734 Sodium/solute symporter IPR038377 Sodium/glucose symporter superfamily	0.0	Minc3s02409g29887	IPR001734 Sodium/solute symporter IPR038377 Sodium/glucose symporter superfamily	0.0	CE27109	cho-1	High-affinity choline transporter 1	0.0	O02228	Caenorhabditis elegans	High-affinity choline transporter 1	0.0	-2.6407	0.0168154	-2.42543	0.023142	48.9953	48.7223		9.67922	6.18366	4.92288	7.34534	0.741139	1.54806		7.37195	11.197	9.74336	13.7414	5.22278	3.61306
Mg679	4159		NXFT01003305.1.8628_g	IPR000008 C2 domain IPR000909 Phosphatidylinositol-specific phospholipase C 2C X domain IPR001192 Phosphoinositide phospholipase C family IPR001711 Phospholipase C 2C phosphatidylinositol-specific 2C Y domain IPR011992 EF-hand domain pair IPR015359 Phosphoinositide-specific phospholipase C 2C EF-hand-like domain IPR016280 Phosphatidylinositol-4 2C 5-bisphosphate phosphodiesterase beta IPR017946 P…	0.0	Minc3s00067g03367	IPR000008 C2 domain IPR000909 Phosphatidylinositol-specific phospholipase C2C X domain IPR001192 Phosphoinositide phospholipase C family IPR001711 Phospholipase C2C phosphatidylinositol-specific2C Y domain IPR011992 EF-hand domain pair IPR016280 Phosphatidylinositol-42C 5-bisphosphate phosphodiesterase beta IPR017946 PLC-like phosphodiesterase2C TIM beta/alpha-barrel domain superfamily IPR035892 …	0.0	CE36909	egl-8	1-phosphatidylinositol 4,5-bisphosphate phosphodiesterase beta egl-8	2e-64	Q17353	Caenorhabditis elegans	Partitioning defective protein 3	4e-69	-2.66666	0.000395109	-2.42915	0.00059307	169.58	137.763		14.3857	35.771	8.64823	15.6044	16.5728	12.4439		21.5835	35.7912	38.8518	37.8549	22.5708	18.674
Mg3024	3127		NXFT01000391.1.10287_g	IPR000152 EGF-type aspartate/asparagine hydroxylation site IPR000742 EGF-like domain IPR001881 EGF-like calcium-binding domain IPR002035 von Willebrand factor 2C type A IPR009030 Growth factor receptor cysteine-rich domain superfamily IPR013032 EGF-like 2C conserved site IPR024730 Merozoite surface protein 2C EGF domain 1 IPR034306 Matrilin-4 IPR036465 von Willebrand factor A-like domain superfam…	0.0	Minc3s02974g32271	IPR000152 EGF-type aspartate/asparagine hydroxylation site IPR000742 EGF-like domain IPR001881 EGF-like calcium-binding domain IPR002035 von Willebrand factor2C type A IPR009030 Growth factor receptor cysteine-rich domain superfamily IPR024730 Merozoite surface protein2C EGF domain 1 IPR024731 EGF domain IPR036465 von Willebrand factor A-like domain superfamily	0.0	CE37256	mua-3	Transmembrane cell adhesion receptor mua-3	0.0	Q61687	Mus musculus	Transcriptional regulator ATRX	0.0	-2.69946	7.04458e-05	-2.77731	2.8055e-05	82.6246	90.2217		9.67922	18.0186	52.4211	51.0001	66.1261	62.4369		14.4777	11.197	45.6212	49.9117	57.621	40.847
Mg742	887		NXFT01000399.1.10521_g		0.0	Minc3s03304g33470		1.94e-14									-2.72975	1.85938e-06	-2.26022	1.20949e-05	617.073	527.626		106.163	65.3583	94.3313	80.4966	16.7312	17.8919		136.697	102.742	119.408	140.692	99.752	78.081
Mg1640	1853		NXFT01002155.1.5694_g	IPR001148 Alpha carbonic anhydrase domain IPR023561 Carbonic anhydrase 2C alpha-class IPR036398 Alpha carbonic anhydrase domain superfamily	0.0	Minc3s03043g32543	IPR001148 Alpha carbonic anhydrase domain IPR023561 Carbonic anhydrase2C alpha-class IPR036398 Alpha carbonic anhydrase domain superfamily	5.86e-152	CE14355	cah-6	Putative carbonic anhydrase 6	3e-49	Q92051	Danio rerio	Carbonic anhydrase	4e-20	-2.75302	2.17055e-05	-2.77356	1.40046e-05	164.673	150.617		28.5053	18.0186	17.0303	26.2231	28.13	29.4287		24.4258	22.1277	21.2513	25.0889	28.9436	27.8779
Mg4143	551					Minc3s02963g32240		3.21e-68									-2.81358	0.000228467	-2.14436	0.00135993	158.576	131.384		28.5053	12.1011	17.0303	7.34534	4.69906	4.1118		31.5315	34.4248	36.144	30.0535	13.7198	14.9088
Mg137	1698		NXFT01002946.1.7491_g	IPR001356 Homeobox domain IPR009057 Homeobox-like domain superfamily	0.0	Minc3s04765g36966	IPR001356 Homeobox domain IPR009057 Homeobox-like domain superfamily IPR017970 Homeobox2C conserved site	3.28e-41	CE08624	ceh-37	Homeobox protein ceh-37	5e-21	Q28FN6	Xenopus tropicalis	Homeobox protein OTX2	3e-21	-2.88529	0.00600326	-2.46212	0.0131047	55.9022	59.8674		9.67922	6.18366	3.99154	1.44605	5.0157	3.79133		10.2143	11.197	7.0356	8.77685	6.2849	11.1435
Mg6542	654		NXFT01000257.1.6857_g	IPR000971 Globin IPR009050 Globin-like superfamily IPR012292 Globin/Protoglobin	0.0	Minc3s00714g16439	IPR000971 Globin IPR009050 Globin-like superfamily IPR012292 Globin/Protoglobin	1.84e-84	CE42769	glb-18		2e-39					-2.89692	0.0304097	-2.79264	0.033214	81.8386	74.0696		12.0325	9.14239	0.266188	7.34534	1.05777	1.22759		15.8989	7.09792	15.8358	11.6137	2.0364	4.44978
Mg6474	1650		NXFT01002076.1.5376_g	IPR013087 Zinc finger C2H2-type	0.0	Minc3s00344g10640		4.42e-100									-2.9023	0.00288592	-3.60218	0.000539391	110.252	109.912		9.67922	20.9773	9.57957	2.62591	22.2722	19.4942		5.9508	12.5633	11.7742	27.9258	10.8874	13.2353
Mg188	716		NXFT01003921.1.10234_g		0.0	Minc3s00520g13678	IPR001304 C-type lectin-like IPR016186 C-type lectin-like/link domain superfamily IPR016187 C-type lectin fold IPR018378 C-type lectin2C conserved site	2.66e-31									-2.96596	7.49244e-05	-2.09731	0.00115024	722.962	635.395		82.6302	91.987	25.4123	34.4821	1.69104	0.907123		108.274	209.317	59.16	93.1742	10.1794	6.95993
Mg3940	2279		NXFT01001248.1.3177_g		0.0	Minc3s00520g13675		7.06e-20									-2.9665	0.0211057	-2.41878	0.0490402	62.4041	79.558		12.0325	6.18366	0.266188	4.98562	2.00768	0.907123		11.6354	15.296	2.97395	3.10307	4.51469	4.03142
Mg1050	784		NXFT01000246.1.6598_g	IPR003677 Domain of unknown function DUF148	0.0	Minc3s04115g35517	IPR003677 Domain of unknown function DUF148	9.22e-50									-3.00685	5.93263e-05	-2.73734	0.000126879	619.24	437.719		63.8042	68.3171	21.687	23.8634	5.80728	2.50946		65.6392	93.1777	44.2673	58.4224	24.6951	40.0103
Mg3908	624		NXFT01003123.1.8134_g	IPR007110 Immunoglobulin-like domain IPR013098 Immunoglobulin I-set IPR013783 Immunoglobulin-like fold IPR036179 Immunoglobulin-like domain superfamily	0.0	Minc3s01175g21423	IPR007110 Immunoglobulin-like domain IPR013098 Immunoglobulin I-set IPR013783 Immunoglobulin-like fold IPR036179 Immunoglobulin-like domain superfamily	3.25e-88									-3.00891	0.00299997	-2.12867	0.0171966	90.2221	80.232		9.67922	12.1011	0.266188	0.266188	0.266188	0.266188		13.0566	26.2268	19.2205	20.8336	4.51469	9.88845
Mg3165	1679		NXFT01001144.1.2987_g		0.0	Minc3s00002g00064	IPR007803 Aspartyl/asparaginy/proline hydroxylase IPR011990 Tetratricopeptide-like helical domain superfamily IPR019734 Tetratricopeptide repeat IPR027443 Isopenicillin N synthase-like IPR039038 Aspartyl/asparaginyl beta-hydroxylase family	1.86e-132	CE41680			4e-13					-3.07352	0.000385988	-2.99349	0.000323235	134.569	153.554		16.739	18.0186	11.4422	9.70506	26.0719	28.4673		11.6354	24.8604	34.7902	12.323	52.3104	41.2654
Mg961	3692		NXFT01001718.1.4419_g	IPR001148 Alpha carbonic anhydrase domain IPR018338 Carbonic anhydrase 2C alpha-class 2C conserved site IPR023561 Carbonic anhydrase 2C alpha-class IPR036398 Alpha carbonic anhydrase domain superfamily	0.0	Minc3s00314g09984	IPR001148 Alpha carbonic anhydrase domain IPR018338 Carbonic anhydrase2C alpha-class2C conserved site IPR023561 Carbonic anhydrase2C alpha-class IPR036398 Alpha carbonic anhydrase domain superfamily	0.0	CE04755	cah-3	Putative carbonic anhydrase 3	3e-68	Q27504	Caenorhabditis elegans	Putative carbonic anhydrase 3	5e-67	-3.10444	0.000305337	-2.16223	0.00262294	86.1494	95.7822		9.67922	12.1011	4.92288	2.62591	26.5468	15.3282		24.4258	16.6623	16.5128	13.7414	32.484	23.2759
Mg1375	444																-3.1537	0.000140151	-2.93195	0.000201474	279.113	210.844		28.5053	26.8948	5.85422	1.44605	1.21609	0.586656		32.9527	31.6922	14.4819	19.4152	8.7632	18.2556
Mg2784	2071		NXFT01004180.1.10853_g	IPR000276 G protein-coupled receptor 2C rhodopsin-like IPR002937 Amine oxidase IPR017452 GPCR 2C rhodopsin-like 2C 7TM IPR036188 FAD/NAD(P)-binding domain superfamily	0.0	Minc3s00022g01373	IPR002937 Amine oxidase IPR036188 FAD/NAD(P)-binding domain superfamily	0.0	CE17462	hpo-15		2e-64	Q99K82	Mus musculus	Spermine oxidase	4e-27	-3.18387	0.00197447	-2.51748	0.00530913	47.2328	49.2037		4.9727	6.18366	24.481	12.0648	10.7151	14.0463		8.7931	8.46427	17.1897	11.6137	12.3036	15.3271
Mg4346	1960		NXFT01001342.1.346_g	IPR003280 Two pore domain potassium channel IPR013099 Potassium channel domain	0.0	Minc3s00146g06008	IPR003280 Two pore domain potassium channel IPR013099 Potassium channel domain	0.0	CE24811	twk-18	TWiK family of potassium channels protein 18	4e-74	Q5R559	Pongo abelii	Dynactin subunit 5	7e-73	-3.22055	0.00564246	-2.35999	0.0222346	46.4231	54.4032		2.61945	9.14239	3.0602	1.44605	8.34035	8.27787		10.2143	9.83061	16.5128	10.9045	6.99299	4.44978
Mg1777	2456		NXFT01003761.1.9762_g	IPR017452 GPCR 2C rhodopsin-like 2C 7TM IPR019427 7TM GPCR 2C serpentine receptor class w (Srw)	0.0	Minc3s00240g08353	IPR017452 GPCR2C rhodopsin-like2C 7TM IPR019427 7TM GPCR2C serpentine receptor class w (Srw)	0.0	CE17616	dmsr-4		3e-61					-3.2415	0.0323854	-3.14561	0.0322286	36.1581	38.3715		4.9727	3.22492	2.12886	0.266188	3.74916	4.1118		3.10849	5.73157	5.68171	8.06763	3.80661	3.61306
Mg2366	1806		NXFT01001799.1.4639_g	IPR004790 Isocitrate dehydrogenase NADP-dependent IPR019818 Isocitrate/isopropylmalate dehydrogenase 2C conserved site IPR024084 Isopropylmalate dehydrogenase-like domain IPR027417 P-loop containing nucleoside triphosphate hydrolase	0.0	Minc3s04636g36711	IPR004790 Isocitrate dehydrogenase NADP-dependent IPR019818 Isocitrate/isopropylmalate dehydrogenase2C conserved site IPR024084 Isopropylmalate dehydrogenase-like domain	0.0	CE15677	idh-2	Isocitrate dehydrogenase [NADP]	3e-129	Q09274	Caenorhabditis elegans	Degenerin-like protein unc-105	1e-115	-3.27618	4.16081e-06	-2.64901	1.27924e-05	151.574	128.832		14.3857	15.0599	42.1764	39.2015	109.347	103.457		23.0046	22.1277	44.9443	27.9258	41.3351	33.3166
Mg3169	3719		NXFT01002916.1.7640_g		0.0	Minc3s00570g14441	IPR000719 Protein kinase domain IPR001054 Adenylyl cyclase class-3/4/guanylyl cyclase IPR001245 Serine-threonine/tyrosine-protein kinase2C catalytic domain IPR001828 Receptor2C ligand binding region IPR011009 Protein kinase-like domain superfamily IPR018297 Adenylyl cyclase class-4/guanylyl cyclase2C conserved site IPR028082 Periplasmic binding protein-like I IPR029787 Nucleotide cyclase	0.0	CE43254			0.0	P18293	Mus musculus	Atrial natriuretic peptide receptor 1	4e-86	-3.33263	1.57149e-05	-2.93066	2.74284e-05	164.888	154.372		14.3857	18.0186	22.6183	12.0648	5.64897	7.95741		20.1623	22.1277	32.7593	36.4365	19.7385	15.7455
Mg159	2584		NXFT01003116.1.8425_g	IPR000718 Peptidase M13 IPR008753 Peptidase M13 2C N-terminal domain IPR018497 Peptidase M13 2C C-terminal domain IPR024079 Metallopeptidase 2C catalytic domain superfamily	0.0	Minc3s01320g22755	IPR000718 Peptidase M13 IPR008753 Peptidase M132C N-terminal domain IPR018497 Peptidase M132C C-terminal domain IPR024079 Metallopeptidase2C catalytic domain superfamily IPR042089 Peptidase M132C domain 2	0.0	CE39118	nep-1	Neprilysin-1	0.0	Q18673	Caenorhabditis elegans	Neprilysin-1	0.0	-3.33644	0.000229652	-2.41677	0.00174078	404.675	358.499		42.6248	32.8123	58.0091	28.5828	186.764	158.898		48.5854	94.5441	88.2685	66.933	67.8882	41.2654
Mg2223	2033		NXFT01002487.1.6553_g	IPR000175 Sodium:neurotransmitter symporter IPR037272 Sodium:neurotransmitter symporter superfamily	0.0	Minc3s00594g14826	IPR000175 Sodium:neurotransmitter symporter IPR037272 Sodium:neurotransmitter symporter superfamily	0.0	CE40659	snf-11	Transporter	0.0	Q6NUB2	Xenopus laevis	Protein CWC15 homolog A	3e-163	-3.37709	0.00539347	-2.71364	0.0131047	58.0218	52.1886		4.9727	6.18366	7.71689	1.44605	5.49065	7.31647		7.37195	9.83061	10.4203	20.8336	15.136	14.4904
Mg2210	1997		NXFT01003032.1.7959_g		0.0	Minc3s02010g27737		0.0	CE23528			5e-61					-3.4074	0.00157358	-2.86543	0.00328325	50.0194	62.5394		4.9727	6.18366	3.0602	7.34534	8.81531	7.63694		8.7931	7.09792	11.0972	14.4506	8.05511	8.63337
Mg4952	795		NXFT01003445.1.8985_g		0.0	Minc3s00022g01422		5.07e-49									-3.44463	0.00177888	-3.46989	0.00135403	96.9623	73.5882		9.67922	6.18366	2.12886	3.80577	1.53272	3.47086		7.37195	8.46427	8.38948	10.1953	3.80661	1.52127
Mg3997	4462		NXFT01002010.1.5189_g		0.0	Minc3s00543g14019		0.0	CE31245			5e-34					-3.45552	0.00369792	-2.12269	0.0344317	62.2136	78.4025		12.0325	0.266188	2.12886	4.98562	15.6229	11.803		20.1623	12.5633	18.5436	16.5783	21.5087	18.2556
Mg1312	2115		NXFT01004184.1.10874_g	IPR001506 Peptidase M12A IPR006026 Peptidase 2C metallopeptidase IPR010695 Fas apoptotic inhibitory molecule 1 IPR024079 Metallopeptidase 2C catalytic domain superfamily IPR038513 FAIM1 domain superfamily	0.0	Minc3s00236g08255	IPR001506 Peptidase M12A IPR003582 ShKT domain IPR006026 Peptidase2C metallopeptidase IPR024079 Metallopeptidase2C catalytic domain superfamily IPR034035 Astacin-like metallopeptidase domain	0.0	CE36313	nas-11	Zinc metalloproteinase nas-11	1e-95	Q21432	Caenorhabditis elegans	Zinc metalloproteinase nas-11	2e-94	-3.5187	0.0131045	-2.41629	0.0412403	34.348	25.5654		4.9727	0.266188	33.7944	39.2015	5.9656	3.47086		3.10849	8.46427	25.9899	22.9613	5.22278	8.63337
Mg935	1738		NXFT01004217.1.10969_g	IPR002213 UDP-glucuronosyl/UDP-glucosyltransferase	0.0	Minc3s00886g18507	IPR002213 UDP-glucuronosyl/UDP-glucosyltransferase	0.0	CE37984	ugt-47	Putative UDP-glucuronosyltransferase ugt-47	5e-110	O02482	Caenorhabditis elegans	Transcription factor unc-37	9e-109	-3.52014	0.00449279	-2.26255	0.0318462	420.037	457.963		56.7444	18.0186	50.5584	23.8634	110.138	109.225		58.5334	124.604	72.0219	120.834	34.2542	39.5919
Mg12109	152		NXFT01000427.1.5610_g		5.74e-73												-3.57196	0.000957031	-3.79507	0.000970637	2843.54	1772.1		221.472	165.955	47.7644	26.2231	14.0398	9.88021		150.908	181.99	152.578	276.153	63.2857	94.397
Mg693	1473		NXFT01004135.1.986_g	IPR001139 Glycoside hydrolase family 30 IPR001286 Glycoside hydrolase 2C family 59 IPR017853 Glycoside hydrolase superfamily	0.0	Minc3s03034g32508	IPR001139 Glycoside hydrolase family 30 IPR013780 Glycosyl hydrolase2C all-beta IPR017853 Glycoside hydrolase superfamily IPR033453 Glycosyl hydrolase family 302C TIM-barrel domain	8.27e-89					Q6YK37	Bacillus subtilis	BACSU Glucuronoxylanase xynC	8e-41	-3.57743	0.00648997	-3.40381	0.0084412	368.688	321.501		28.5053	29.8535	6.78555	4.98562	1.21609	0.266188		18.7412	46.722	32.7593	78.9898	5.93086	9.88845
Mg5243	623					Minc3s01017g19900		6.72e-41									-3.61234	0.00487114	-4.5174	0.00114962	69.8826	59.7471		4.9727	6.18366	3.0602	4.98562	11.3484	14.3668		5.9508	0.266188	5.68171	8.77685	15.844	14.4904
Mg2075	589		NXFT01001497.1.3914_g	IPR001781 Zinc finger 2C LIM-type	1.32e-159	Minc3s10768g44352	IPR001781 Zinc finger2C LIM-type	2.24e-66									-3.6808	0.000331426	-4.21275	9.35175e-05	175.748	160.222		14.3857	12.1011	2.12886	6.16548	8.49867	7.31647		5.9508	12.5633	22.6052	11.6137	2.39044	6.95993
Mg7816	3366		NXFT01000674.1.1571_g		0.0	Minc3s03300g33456		0.0	CE37678			1e-37					-3.71471	0.000947106	-2.05064	0.00414917	14.9849	20.2456		2.61945	0.266188	50.5584	43.921	361.546	359.19		3.10849	5.73157	23.9591	28.6351	82.758	76.8259
Mg23	683																-3.76108	5.87004e-06	-2.93735	3.91159e-05	528.474	474.139		33.2118	41.6885	2.12886	8.5252	1.53272	1.22759		59.9546	71.3162	33.4363	44.9471	11.2415	19.5107
Mg143	1645		NXFT01000379.1.9902_g	IPR001547 Glycoside hydrolase 2C family 5 IPR017853 Glycoside hydrolase superfamily	0.0	Minc3s00202g07474	IPR001547 Glycoside hydrolase2C family 5 IPR017853 Glycoside hydrolase superfamily IPR018087 Glycoside hydrolase2C family 52C conserved site	4.16e-168					P22541	Butyrivibrio fibrisolvens	BUTFI Endoglucanase A	9e-35	-3.83038	0.000617524	-2.57412	0.0052578	202.923	169.778		14.3857	12.1011	2.12886	0.266188	2.64094	1.54806		23.0046	39.8902	17.8666	41.401	6.99299	3.1947
Mg5376	222																-3.832	0.00643283	-2.3591	0.0482476	58.8078	55.703		2.61945	6.18366	2.12886	0.266188	0.424505	0.907123		7.37195	15.296	13.1281	13.7414	5.57682	9.88845
Mg325	4188	SP	NXFT01004291.1.11196_g	IPR001547 Glycoside hydrolase 2C family 5 IPR017853 Glycoside hydrolase superfamily IPR018087 Glycoside hydrolase 2C family 5 2C conserved site	0.0	Minc3s00708g16378	IPR007588 Zinc finger2C FLYWCH-type IPR018289 MULE transposase domain	2.06e-174					P07103	Dickeya dadantii	DICD3 Endoglucanase Z	8e-22	-3.89099	0.00395315	-2.46332	0.0313026	1929.85	1343.1		108.516	112.698	26.3436	49.8203	16.4145	9.23928		254.652	339.12	178.302	424.381	108.603	164.681
Mg711	422	SP	NXFT01000945.1.2477_g	IPR001534 Transthyretin-like IPR038479 Transthyretin-like superfamily	7.16e-166	Minc3s03739g34653	IPR001534 Transthyretin-like IPR038479 Transthyretin-like superfamily	1.28e-63	CE39742	ttr-45		9e-38	Q22285	Caenorhabditis elegans	Transthyretin-like protein 46	8e-34	-3.89458	9.27992e-05	-3.75258	7.13096e-05	167.508	151.869		4.9727	18.0186	2.12886	0.266188	20.0558	17.8919		8.7931	15.296	11.7742	17.2875	18.3223	17.4189
Mg5	152		NXFT01000427.1.5610_g		5.74e-73	Minc3s03837g34949		2.26e-15									-3.89824	3.1474e-10	-3.68384	6.60721e-10	2284.6	2210.95		136.755	165.955	43.1077	42.7411	9.92352	8.59834		176.489	173.792	176.271	176.862	76.0312	68.4587
Mg2394	2795		NXFT01002682.1.7089_g	IPR001873 Epithelial sodium channel	0.0	Minc3s00129g05506	IPR001873 Epithelial sodium channel	0.0	CE43784	del-6		2e-131					-3.90603	0.000174115	-3.1123	0.000511851	252.7	227.791		9.67922	23.9361	22.6183	14.4245	3.74916	6.35507		17.32	38.5239	29.3746	49.9117	14.7819	22.0209
Mg2037	478																-3.91605	0.000122007	-2.50388	0.00197499	327.651	473.008		21.4455	32.8123	4.92288	6.16548	1.53272	0.266188		81.2719	60.3854	47.652	60.55	11.5955	14.9088
Mg819	1830		NXFT01001611.1.4195_g	IPR001393 Calsequestrin IPR036249 Thioredoxin-like superfamily	0.0	Minc3s00014g00907	IPR001393 Calsequestrin IPR036249 Thioredoxin-like superfamily	1.57e-131	CE05839	csq-1	Calsequestrin	7e-144	P07221	Oryctolagus cuniculus	Calsequestrin-1	2e-25	-3.93253	9.07413e-07	-3.03685	4.50738e-06	209.878	226.298		19.0923	9.14239	32.863	28.5828	23.6971	18.5328		31.5315	22.1277	57.1292	67.6422	19.3845	22.4392
Mg255	413		NXFT01002290.1.6077_g	IPR008597 Invertebrate-type lysozyme	2.98e-45												-3.99526	0.00316168	-2.97737	0.0138506	1479.55	1488.56		61.4509	127.492	12.3736	15.6044	3.59084	0.586656		166.541	210.684	188.456	273.316	117.808	147.11
Mg3154	425	SP	NXFT01001952.1.5042_g		2.71e-135	Minc3s03162g32996		5.13e-20									-4.01058	0.00159802	-5.67324	0.000202022	110.681	103.942		4.9727	9.14239	3.0602	2.62591	0.582822	0.266188		0.266188	4.36523	7.0356	8.77685	1.32831	3.1947
Mg1078	1789		NXFT01001426.1.3681_g	IPR000276 G protein-coupled receptor 2C rhodopsin-like IPR017452 GPCR 2C rhodopsin-like 2C 7TM	3.83e-30	Minc3s00685g16061	IPR000276 G protein-coupled receptor2C rhodopsin-like	2.15e-15	CE39139	dop-4	Dopamine receptor 4	6e-16	Q18775	Caenorhabditis elegans	Dopamine receptor 4	7e-15	-4.04298	0.000229652	-2.74073	0.00199969	160.648	137.209		14.3857	3.22492	3.0602	9.70506	2.79926	2.82993		17.32	27.5931	11.0972	12.323	6.63894	14.072
Mg1750	1407		NXFT01001514.1.3973_g		0.0												-4.08462	0.00848125	-3.15449	0.0215226	48.2808	39.5029		4.9727	0.266188	1.19753	1.44605	1.84936	2.82993		5.9508	4.36523	6.35865	8.77685	3.80661	4.44978
Mg4797	1202		NXFT01004256.1.11040_g	IPR000217 Tubulin IPR002453 Beta tubulin IPR003008 Tubulin/FtsZ 2C GTPase domain IPR008280 Tubulin/FtsZ 2C C-terminal IPR013838 Beta tubulin 2C autoregulation binding site IPR017975 Tubulin 2C conserved site IPR018316 Tubulin/FtsZ 2C 2-layer sandwich domain IPR023123 Tubulin 2C C-terminal IPR036525 Tubulin/FtsZ 2C GTPase domain superfamily IPR037103 Tubulin/FtsZ 2C C-terminal domain superfamily	0.0	Minc3s00022g01426	IPR000217 Tubulin IPR002453 Beta tubulin IPR003008 Tubulin/FtsZ2C GTPase domain IPR008280 Tubulin/FtsZ2C C-terminal IPR018316 Tubulin/FtsZ2C 2-layer sandwich domain IPR023123 Tubulin2C C-terminal IPR036525 Tubulin/FtsZ2C GTPase domain superfamily IPR037103 Tubulin/FtsZ2C C-terminal domain superfamily	5.42e-151	CE00850	tbb-4	Tubulin beta-4 chain	1e-143	P18700	Strongylocentrotus purpuratus	STRPU Tubulin beta chain (Fragment)	3e-144	-4.25028	0.0347733	-5.17296	0.0140875	27.7507	24.3859		0.266188	3.22492	9.57957	6.16548	6.59887	8.59834		1.68734	0.266188	5.68171	7.3584	6.63894	3.61306
Mg1996	473		NXFT01000470.1.1070_g	IPR001609 Myosin head 2C motor domain IPR002928 Myosin tail IPR004009 Myosin 2C N-terminal 2C SH3-like IPR008989 Myosin S1 fragment 2C N-terminal IPR027401 Myosin IQ motif-containing domain superfamily IPR027417 P-loop containing nucleoside triphosphate hydrolase IPR036961 Kinesin motor domain superfamily	4.61e-19												-4.26289	0.0116325	-3.97946	0.0171481	905.708	862.342		23.7988	71.2758	11.4422	21.5037	1.21609	0.907123		27.2681	84.9797	36.144	74.7345	6.63894	13.6537
Mg920	1678					Minc3s04771g36974	IPR009009 RlpA-like protein2C double-psi beta-barrel domain IPR036908 RlpA-like domain superfamily	1.73e-46									-4.26476	0.000192627	-3.2525	0.000786791	408.247	451.632		21.4455	23.9361	2.12886	6.16548	1.84936	1.22759		30.1104	60.3854	38.8518	59.8408	10.5334	24.1127
Mg95	693		NXFT01000888.1.2240_g	IPR002701 Chorismate mutase II 2C prokaryotic-type IPR019425 7TM GPCR 2C serpentine receptor class t (Srt) IPR036263 Chorismate mutase type II superfamily	0.0	Minc3s01325g22793	IPR002701 Chorismate mutase II2C prokaryotic-type IPR036263 Chorismate mutase type II superfamily	2.42e-74									-4.27904	0.00744153	-3.62885	0.015361	717.151	588.118		42.6248	23.9361	2.12886	7.34534	6.75718	2.50946		37.2162	68.5835	64.5756	161.259	43.4593	63.0201
Mg7667	2793		NXFT01001690.1.4369_g	IPR000731 Sterol-sensing domain IPR003392 Protein patched/dispatched	0.0	Minc3s00095g04388	IPR000731 Sterol-sensing domain IPR003392 Protein patched/dispatched	0.0	CE15305	ptr-23		1e-162					-4.37615	0.00403729	-2.47942	0.0277684	29.2274	25.7821		2.61945	0.266188	17.0303	12.0648	6.9155	6.67554		4.52965	5.73157	20.5744	11.6137	18.6764	23.2759
Mg3913	1646		NXFT01004145.1.10791_g	IPR000276 G protein-coupled receptor 2C rhodopsin-like IPR017452 GPCR 2C rhodopsin-like 2C 7TM	0.0	Minc3s05270g37911		2.00e-74									-4.38791	0.0113757	-5.26612	0.00437391	60.213	48.3371		4.9727	0.266188	3.99154	3.80577	2.95758	1.54806		0.266188	2.99888	6.35865	7.3584	4.51469	12.817
Mg506	402		NXFT01002106.1.5431_g		4.33e-123												-4.46288	0.000346144	-2.12144	0.0158718	195.897	150.304		9.67922	6.18366	3.99154	0.266188	0.899456	0.266188		40.0585	39.8902	34.1132	50.6209	11.5955	17.4189
Mg631	557		NXFT01000805.1.2060_g		1.19e-15												-4.601	0.00256214	-5.02044	0.00197499	573.702	511.691		21.4455	23.9361	3.0602	0.266188	2.00768	0.586656		14.4777	19.395	23.2822	55.5855	14.7819	29.133
Mg4233	565		NXFT01000657.1.1529_g	IPR002227 Tyrosinase copper-binding domain IPR008922 Uncharacterised domain 2C di-copper centre	0.0	Minc3s01766g26144	IPR002227 Tyrosinase copper-binding domain IPR008922 Uncharacterised domain2C di-copper centre IPR015559 Putative tyrosinase-like2C Tyr-3	1.55e-67	CE42097	tyr-3	Putative tyrosinase-like protein tyr-3	2e-42	Q19673	Caenorhabditis elegans	Putative tyrosinase-like protein tyr-3	3e-41	-4.63732	0.0112219	-4.91976	0.00736117	56.4023	72.4087		4.9727	0.266188	0.266188	0.266188	0.741139	0.586656		4.52965	0.266188	2.97395	1.68463	2.0364	1.10291
Mg332	1094		NXFT01001566.1.4078_g	IPR009009 RlpA-like protein 2C double-psi beta-barrel domain IPR036908 RlpA-like domain superfamily	0.0	Minc3s01732g25926	IPR009009 RlpA-like protein2C double-psi beta-barrel domain IPR036908 RlpA-like domain superfamily	2.09e-63									-4.66471	0.0123568	-3.13626	0.0469806	604.045	700.869		9.67922	44.6472	3.0602	9.70506	2.48263	0.586656		50.0065	98.6431	72.6988	113.032	16.5521	31.6431
Mg133	1760		NXFT01002739.1.7169_g	IPR001547 Glycoside hydrolase 2C family 5 IPR017853 Glycoside hydrolase superfamily	1.12e-164	Minc3s00520g13673	IPR001547 Glycoside hydrolase2C family 5 IPR001919 Carbohydrate-binding type-2 domain IPR008965 CBM2/CBM32C carbohydrate-binding domain superfamily IPR012291 CBM22C carbohydrate-binding domain superfamily IPR017853 Glycoside hydrolase superfamily IPR018087 Glycoside hydrolase2C family 52C conserved site	3.99e-53					O85465	Bacillus agaradhaerens	BACAG Endoglucanase 5A	8e-28	-4.75315	1.74599e-07	-4.56466	1.6274e-07	570.225	647.936		16.739	29.8535	3.99154	7.34534	2.16599	2.18899		20.1623	31.6922	59.837	91.7558	11.2415	16.5822
Mg571	449		NXFT01003863.1.10048_g	IPR002068 Alpha crystallin/Hsp20 domain IPR008978 HSP20-like chaperone	1.52e-43	Minc3s00326g10279	IPR002068 Alpha crystallin/Hsp20 domain IPR008978 HSP20-like chaperone	2.02e-26									-4.75732	3.51724e-06	-2.13246	0.000819654	344.49	492.626		23.7988	6.18366	59.8718	39.2015	227.768	210.813		92.6411	98.6431	124.146	88.2097	291.997	330.77
Mg1761	3886		NXFT01001474.1.3863_g		0.0	Minc3s03216g33169		0.0	CE24825	dyc-1	Dystrophin-like protein 1	4e-14	Q8STF6	Caenorhabditis elegans	Dystrophin-like protein 1	4e-12	-4.76533	4.40467e-05	-2.23219	0.00274714	73.4075	70.82		2.61945	3.22492	11.4422	10.8849	19.5809	11.803		11.6354	19.395	17.1897	22.9613	22.2168	25.7861
Mg1857	1066		NXFT01001222.1.3114_g	IPR017853 Glycoside hydrolase superfamily	0.0	Minc3s05621g38543	IPR001547 Glycoside hydrolase2C family 5 IPR017853 Glycoside hydrolase superfamily	1.71e-71					P10475	Bacillus subtilis	BACSU Endoglucanase	2e-20	-4.77341	0.00297778	-2.77688	0.02487	632.625	572.472		28.5053	15.0599	7.71689	12.0648	4.22411	0.907123		50.0065	125.97	120.762	178.99	29.6517	32.8982
Mg1117	357		NXFT01002795.1.7320_g	IPR002347 Short-chain dehydrogenase/reductase SDR IPR020904 Short-chain dehydrogenase/reductase 2C conserved site IPR036291 NAD(P)-binding domain superfamily	2.99e-114												-4.79055	1.95556e-06	-4.40858	2.13684e-06	331.081	319.046		14.3857	9.14239	2.12886	1.44605	2.16599	1.22759		10.2143	20.7614	14.4819	30.7627	12.3036	10.3068
Mg647	1006		NXFT01001454.1.3749_g	IPR036908 RlpA-like domain superfamily	0.0	Minc3s00489g13197	IPR036908 RlpA-like domain superfamily	2.39e-47									-4.88299	0.00638778	-3.17291	0.0274995	547.552	330.913		2.61945	29.8535	7.71689	12.0648	0.899456	0.266188		41.4796	56.2864	57.1292	100.266	19.0304	27.4595
Mg2244	1067		NXFT01004130.1.976_g	IPR001464 Annexin IPR018252 Annexin repeat 2C conserved site IPR018502 Annexin repeat IPR037104 Annexin superfamily	0.0	Minc3s03009g32417	IPR001464 Annexin IPR018252 Annexin repeat2C conserved site IPR018502 Annexin repeat IPR037104 Annexin superfamily	0.0	CE35364	nex-2	Annexin	8e-65	P12429	Homo sapiens	Annexin A3	1e-59	-4.94144	5.90885e-07	-2.92402	1.53417e-05	220.238	265.728		7.32596	9.14239	4.92288	4.98562	154.784	152.809		25.8469	38.5239	36.821	57.0039	34.2542	60.5099
Mg295	349		NXFT01000699.1.1659_g	IPR000175 Sodium:neurotransmitter symporter IPR037272 Sodium:neurotransmitter symporter superfamily	3.81e-108												-5.10612	0.000287671	-3.35123	0.00171429	297.809	327.038		14.3857	3.22492	3.99154	4.98562	1.84936	0.266188		24.4258	37.1575	90.2993	105.231	57.267	58.8365
Mg764	445																-5.31097	1.89905e-07	-3.07152	7.89518e-06	473.053	358.355		12.0325	9.14239	0.266188	0.266188	0.741139	0.266188		45.7431	53.5537	42.2365	41.401	6.63894	7.37829
Mg692	1885		NXFT01001263.1.270_g	IPR002018 Carboxylesterase 2C type B IPR029058 Alpha/Beta hydrolase fold	0.0	Minc3s05606g38512	IPR002018 Carboxylesterase2C type B IPR019826 Carboxylesterase type B2C active site IPR029058 Alpha/Beta hydrolase fold	0.0	CE07569	ace-1	Acetylcholinesterase 1	8e-41	P37967	Bacillus subtilis	BACSU Para-nitrobenzyl esterase	2e-47	-5.39191	0.000230184	-3.78403	0.000817004	187.752	139.713		7.32596	0.266188	0.266188	1.44605	0.266188	0.586656		13.0566	11.197	17.1897	32.8904	4.86873	6.54157
Mg2171	3271		NXFT01002069.1.540_g	IPR004979 Transcription factor AP-2 IPR013854 Transcription factor AP-2 2C C-terminal	0.0	Minc3s01163g21313	IPR013854 Transcription factor AP-22C C-terminal	1.41e-62	CE35990	aptf-1	Transcription factor aptf-1	4e-61	Q2T9K2	Xenopus laevis	Transcription factor AP-2-epsilon	1e-60	-5.67094	0.00361092	-2.99092	0.0346865	87.5785	46.6521		2.61945	0.266188	0.266188	2.62591	2.16599	1.54806		11.6354	5.73157	3.65089	7.3584	1.68236	4.44978
Mg1726	498		NXFT01000502.1.1166_g		6.69e-157												-5.68069	0.021557	-7.87009	0.0131988	807.964	504.181		23.7988	0.266188	6.78555	0.266188	1.05777	0.266188		3.10849	2.99888	1.62007	8.77685	1.68236	1.10291
Mg5308	2238		NXFT01001142.1.2981_g	IPR003663 Sugar/inositol transporter IPR005828 Major facilitator 2C sugar transporter-like IPR005829 Sugar transporter 2C conserved site IPR020846 Major facilitator superfamily domain IPR036259 MFS transporter superfamily	0.0	Minc3s00816g17713	IPR003663 Sugar/inositol transporter IPR005828 Major facilitator2C sugar transporter-like IPR005829 Sugar transporter2C conserved site IPR020846 Major facilitator superfamily domain IPR036259 MFS transporter superfamily	0.0	CE33672	hmit-1.3		5e-160	Q96QE2	Homo sapiens	Proton myo-inositol cotransporter	3e-86	-5.78458	7.07702e-05	-2.23827	0.00726723	66.191	79.6061		2.61945	0.266188	2.12886	2.62591	14.9897	8.27787		20.1623	11.197	15.8358	13.7414	30.3598	34.99
Mg3769	454		NXFT01004069.1.10651_g		4.86e-133	Minc3s01125g20957		9.07e-20									-6.1813	0.000195129	-4.09278	0.000697059	201.613	178.179		4.9727	0.266188	2.12886	2.62591	0.741139	0.266188		5.9508	16.6623	12.4511	19.4152	4.16065	9.88845
Mg707	765		NXFT01004063.1.10634_g	IPR001283 Cysteine-rich secretory protein-related IPR002413 Venom allergen 5-like IPR014044 CAP domain IPR018244 Allergen V5/Tpx-1-related 2C conserved site IPR035940 CAP superfamily	0.0	Minc3s00044g02448	IPR001283 Cysteine-rich secretory protein-related IPR002413 Venom allergen 5-like IPR014044 CAP domain IPR035940 CAP superfamily	1.53e-39	CE10802	scl-11		3e-21	Q16937	Ancylostoma	Ancylostoma secreted protein	4e-16	-6.26201	2.72339e-05	-3.9464	0.000156334	266.419	333.922		7.32596	0.266188	3.99154	2.62591	1.05777	1.22759		13.0566	26.2268	49.6829	104.522	25.4032	24.1127
Mg2893	1183		NXFT01000657.1.1529_g	IPR002227 Tyrosinase copper-binding domain IPR008922 Uncharacterised domain 2C di-copper centre	0.0	Minc3s00366g11094	IPR002227 Tyrosinase copper-binding domain IPR008922 Uncharacterised domain2C di-copper centre IPR015559 Putative tyrosinase-like2C Tyr-3	3.05e-91	CE42097	tyr-3	Putative tyrosinase-like protein tyr-3	2e-53	Q19673	Caenorhabditis elegans	Putative tyrosinase-like protein tyr-3	3e-52	-6.75942	1.68333e-05	-3.61926	0.000222333	152.241	138.172		0.266188	3.22492	3.99154	2.62591	1.05777	0.907123		5.9508	18.0287	5.68171	5.93996	2.74448	1.52127
Mg4157	2663		NXFT01002076.1.5376_g	IPR013087 Zinc finger C2H2-type	0.0	Minc3s00074g03674	IPR013087 Zinc finger C2H2-type	0.0	CE01545			5e-58					-10.1475	0.0221277	-4.73112	0.036888	17.2475	20.9918		0.266188	0.266188	2.12886	4.98562	8.65699	8.91881		0.266188	1.63253	8.38948	4.52152	6.63894	6.12322
Mg1486	2436		NXFT01001545.1.4026_g	IPR018482 Zinc finger 2C C4H2-type	0.0	Minc3s00014g00922	IPR006875 Sarcoglycan complex subunit protein IPR039972 Sarcoglycan gamma/delta/zeta	8.33e-174	CE05569	sgn-1		9e-96	Q96LD1	Homo sapiens	Zeta-sarcoglycan	9e-32	-10.447	0.0367684	-10.447	0.0243648	26.9886	19.9567		0.266188	0.266188	0.266188	0.266188	2.32431	4.75273		0.266188	0.266188	1.62007	1.68463	2.74448	3.61306
Mg7577	717		NXFT01003493.1.9116_g		0.0	Minc3s00043g02380		1.74e-100									-10.6494	0.0286239	-10.6494	0.0180447	27.7269	26.2154		0.266188	0.266188	1.19753	4.98562	0.741139	0.586656		0.266188	0.266188	1.62007	5.93996	2.74448	3.61306
Mg1456	1214		NXFT01001303.1.3326_g	IPR001839 Transforming growth factor-beta 2C C-terminal IPR015615 Transforming growth factor-beta-related IPR017948 Transforming growth factor beta 2C conserved site IPR029034 Cystine-knot cytokine	0.0	Minc3s00153g06233	IPR001839 Transforming growth factor-beta2C C-terminal IPR029034 Cystine-knot cytokine	4.99e-173	CE01758	daf-7	Dauer larva development regulatory growth factor daf-7	6e-18	O01393	Caenorhabditis elegans	Innexin unc-9	1e-16	-10.7916	0.0109177	-10.7916	0.0061988	32.3712	27.106		0.266188	0.266188	2.12886	2.62591	2.95758	5.39367		0.266188	0.266188	4.32783	8.77685	4.16065	1.93962
Mg1778	1890		NXFT01001670.1.4314_g	IPR018483 Carbohydrate kinase 2C FGGY 2C conserved site IPR018484 Carbohydrate kinase 2C FGGY 2C N-terminal	0.0	Minc3s04961g37333	IPR000577 Carbohydrate kinase2C FGGY IPR005999 Glycerol kinase IPR018483 Carbohydrate kinase2C FGGY2C conserved site IPR018484 Carbohydrate kinase2C FGGY2C N-terminal IPR018485 Carbohydrate kinase2C FGGY2C C-terminal	0.0	CE04828		Probable glycerol kinase	0.0	Q21944	Caenorhabditis elegans	Probable glycerol kinase	0.0	-11.071	0.000344785	-3.67433	0.00195129	40.1593	31.9203		0.266188	0.266188	8.64823	9.70506	36.2041	27.8264		3.10849	2.99888	15.1589	6.64918	19.0304	15.3271
Mg9772	1319		NXFT01003910.1.10203_g	IPR033438 Modulator of levamisole receptor-1	7.13e-96	Minc3s00490g13204	IPR006629 LPS-induced tumour necrosis factor alpha factor IPR037519 LITAF domain containing protein	3.18e-20	CE38471			6e-11					-11.3308	0.00297088	-5.913	0.00384001	49.4954	36.7106		0.266188	0.266188	1.19753	0.266188	3.90748	3.15039		0.266188	1.63253	6.35865	13.0322	3.80661	5.2865
Mg1380	1614		NXFT01001569.1.3547_g	IPR008908 Sarcoglycan alpha/epsilon	0.0	Minc3s00592g14802	IPR008908 Sarcoglycan alpha/epsilon	1.39e-97	CE37119	sgca-1		2e-51					-11.5108	0.00112308	-2.54069	0.0495987	47.2805	50.311		0.266188	0.266188	1.19753	4.98562	1.53272	3.15039		5.9508	11.197	7.0356	8.06763	8.7632	6.54157
Mg299	421		NXFT01000190.1.4940_g		0.0	Minc3s02558g30635		1.85e-59									-12.0293	0.000240492	-3.18882	0.00668423	66.5721	73.0105		0.266188	0.266188	3.99154	3.80577	1.84936	3.15039		3.10849	12.5633	6.35865	5.93996	2.74448	2.35798
Mg3670	506		NXFT01001952.1.5049_g	IPR006629 LPS-induced tumour necrosis factor alpha factor IPR037519 LITAF domain containing protein	1.49e-143												-12.0511	0.00761428	-5.63999	0.0132298	70.6685	71.0366		0.266188	0.266188	0.266188	4.98562	0.266188	0.266188		3.10849	0.266188	3.65089	7.3584	1.68236	0.684547
Mg1070	867		NXFT01003013.1.7912_g	IPR004898 Pectate lyase PlyH/PlyE-like IPR011050 Pectin lyase fold/virulence factor IPR012334 Pectin lyase fold	0.0	Minc3s01957g27421	IPR004898 Pectate lyase PlyH/PlyE-like IPR011050 Pectin lyase fold/virulence factor IPR012334 Pectin lyase fold	9.64e-113					Q5BA88	Emericella nidulans	EMENI Probable pectate lyase D	2e-17	-12.2365	0.00295566	-5.83717	0.00491519	77.3134	83.7464		0.266188	0.266188	0.266188	0.266188	0.266188	0.266188		0.266188	2.99888	0.266188	1.68463	0.62023	0.266188
Mg320	189					Minc3s00800g17506		3.97e-18									-13.1802	0.00296591	-5.46765	0.00571773	226.668	82.6632		0.266188	0.266188	0.266188	0.266188	1.05777	0.586656		1.68734	5.73157	0.943129	5.93996	2.0364	2.35798
Mg292	302																-13.8786	1.50207e-07	-3.45043	7.89518e-06	265.609	236.047		0.266188	0.266188	5.85422	3.80577	9.13194	10.5211		15.8989	30.3258	21.9283	19.4152	20.0925	28.7146

## Sheet: 2dpi vs J2 R
M. graminicola transcript	Length	SP & NLS prediction	Best blastn hit			Best blastx hit											LogFC (Nip2 versus J2)	FDR (Padj)	LogFC (Tog2 versus J2)	FDR (Padj)	normalised CPM value
			M. graminicola			M. incognita			C. elegans				Uniprot								pre-J2			in Nipponbare (S)							in TOG5681 (R )
			CDS	Fonction	e-value	Protein	Fonction	e-value	Protein	Class	Fonction	e-value	Protein	Species	Fonction	e-value					J2A	J2B		Nip2A	Nip2B	Nip4A	Nip4B	Nip8A	Nip8B		Tog2A	Tog2B	Tog4A	Tog4B	Tog8A	Tog8B
Mg60028	849																9.25885	0.115672	12.8764	0.0229176	0.266188	0.266188		19.0923	0.266188	113.889	40.3814	0.266188	0.907123		186.437	64.4845	36.821	4.52152	1.68236	0.266188
Mg66141	870																8.83602	0.0779023	11.6682	0.0198329	0.266188	0.266188		14.3857	0.266188	103.645	15.6044	1.21609	0.266188		82.693	26.2268	17.8666	5.23074	0.974272	0.266188
Mg60925	171					Minc3s06127g39373	IPR000795 Transcription factor2C GTP-binding domain IPR004160 Translation elongation factor EFTu/EF1A2C C-terminal IPR004161 Translation elongation factor EFTu-like2C domain 2 IPR004539 Translation elongation factor EF1A2C eukaryotic/archaeal IPR009000 Translation protein2C beta-barrel domain superfamily IPR009001 Translation elongation factor EF1A/initiation factor IF2gamma2C C-terminal IPR02741…	4.12e-20	CE33153	eef-1A.2	Elongation factor 1-alpha	4e-21	P14963	Euglena gracilis	EUGGR Elongation factor 1-alpha	6e-19	8.87371	0.056535	10.974	0.0205106	0.266188	0.266188		9.67922	6.18366	0.266188	0.266188	0.266188	0.586656		34.3738	33.0585	35.4671	40.6918	2.74448	63.4384
Mg65908	706																7.28328	0.234251	9.923	0.0299856	0.266188	0.266188		4.9727	0.266188	73.8419	10.8849	5.0157	0.266188		24.4258	8.46427	53.7445	25.7982	9.82532	7.79665
Mg66318	797					Minc3s00542g14005	IPR000196 Ribosomal protein L19/L19e IPR015972 Ribosomal protein L19/L19e2C domain 1 IPR023638 Ribosomal protein L19/L19e conserved site IPR033935 Ribosomal protein L192C eukaryotic IPR035970 Ribosomal protein L19/L19e superfamily IPR039547 60S ribosomal protein L19	3.72e-83	CE08034	rpl-19	60S ribosomal protein L19	3e-51	Q7ZYS1	Xenopus laevis	60S ribosomal protein L19	5e-59	8.66133	0.0857162	9.69567	0.031307	0.266188	0.266188		2.61945	12.1011	15.1676	133.59	17.0478	43.8498		1.68734	26.2268	0.943129	0.97541	12.3036	13.2353
Mg65400	356																7.22955	0.0956021	9.50048	0.0497162	0.266188	0.266188		4.9727	0.266188	13.3049	0.266188	0.582822	0.266188		23.0046	1.63253	4.32783	1.68463	2.0364	0.266188
Mg66510	378					Minc3s02659g31087	IPR005326 Plectin/S102C N-terminal IPR036388 Winged helix-like DNA-binding domain superfamily IPR037447 40S Ribosomal protein S10	1.25e-23	CE09041	rps-10		1e-27	Q962R9	Spodoptera frugiperda	SPOFR 40S ribosomal protein S10	2e-38	-5.12548e-15	1	9.37138	0.0277684	0.266188	0.266188		0.266188	0.266188	2.12886	10.8849	1.21609	23.6603		1.68734	20.7614	9.06642	5.93996	28.9436	13.2353
Mg69555	717					Minc3s00024g01505	IPR000554 Ribosomal protein S7e	1.28e-51	CE06577	rps-7	40S ribosomal protein S7	1e-53	P62083	Rattus norvegicus	40S ribosomal protein S7	6e-67	6.30593	0.437635	9.28757	0.0304315	0.266188	0.266188		2.61945	0.266188	3.0602	14.4245	4.69906	45.4521		4.52965	16.6623	12.4511	33.5996	73.5529	44.6123
Mg73265	492					Minc3s01644g25308	IPR008195 Ribosomal protein L34Ae IPR018065 Ribosomal protein L34e2C conserved site IPR038562 Ribosomal protein L34Ae superfamily	1.05e-32	CE26911	rpl-34		2e-32	P40525	Saccharomyces cerevisiae	60S ribosomal protein L34-B	2e-39	6.34213	0.345019	9.17884	0.0280992	0.266188	0.266188		0.266188	3.22492	4.92288	21.5037	3.74916	23.3398		0.266188	19.395	9.06642	15.1598	41.3351	17.8373
Mg61228	233																7.88311	0.0780547	9.08772	0.0132136	0.266188	0.266188		4.9727	3.22492	47.7644	63.9786	7.70709	45.7726		7.37195	11.197	23.9591	18.7059	2.74448	22.8576
Mg67188	300																-5.12548e-15	1	8.98399	0.023243	0.266188	0.266188		0.266188	0.266188	11.4422	0.266188	2.00768	0.586656		11.6354	5.73157	25.313	2.39385	5.57682	1.10291
Mg66759	562					Minc3s00038g02234	IPR001147 Ribosomal protein L21e IPR008991 Translation protein SH3-like domain superfamily IPR018259 Ribosomal protein L21e2C conserved site IPR036948 Ribosomal protein L21 superfamily	1.38e-46	CE00078	rpl-21	60S ribosomal protein L21	2e-41	Q9UUC1	Schizosaccharomyces pombe	60S ribosomal protein L21-A	8e-55	-5.12548e-15	1	8.97058	0.0161307	0.266188	0.266188		0.266188	0.266188	5.85422	30.9425	5.64897	37.1199		5.9508	11.197	5.68171	18.7059	50.1861	34.1533
Mg66613	1342					Minc3s00270g09070	IPR002227 Tyrosinase copper-binding domain IPR008922 Uncharacterised domain2C di-copper centre IPR015559 Putative tyrosinase-like2C Tyr-3	1.14e-21					P09042	Nicotiana tabacum	TOBAC Pathogenesis-related protein 1C	5e-13	7.27216	0.077895	8.9634	0.00833859	0.266188	0.266188		4.9727	0.266188	24.481	39.2015	3.43253	24.3012		3.10849	13.9297	4.32783	20.1244	1.32831	6.54157
Mg66260	352					Minc3s03754g34703	IPR007698 Alanine dehydrogenase/pyridine nucleotide transhydrogenase2C NAD(H)-binding domain IPR007886 Alanine dehydrogenase/pyridine nucleotide transhydrogenase2C N-terminal IPR024605 NAD(P) transhydrogenase2C alpha subunit2C C-terminal IPR026255 NAD(P) transhydrogenase2C alpha subunit IPR029035 DHS-like NAD/FAD-binding domain superfamily IPR034300 NADP transhydrogenase beta-like domain IPR03629…	2.03e-43	CE08176	nnt-1		8e-43	P11024	Bos taurus	NAD(P) transhydrogenase, mitochondrial	1e-44	6.38795	0.117466	8.95953	0.0259477	0.266188	0.266188		0.266188	3.22492	6.78555	8.5252	0.266188	0.907123		3.10849	13.9297	4.32783	3.10307	3.45257	1.10291
Mg67511	298																-5.12548e-15	1	8.87311	0.0295452	0.266188	0.266188		0.266188	0.266188	14.2363	1.44605	1.21609	0.266188		15.8989	0.266188	28.6977	4.52152	7.34703	3.61306
Mg67094	568					Minc3s00822g17759	IPR001976 Ribosomal protein S24e IPR012678 Ribosomal protein L23/L15e core domain superfamily IPR018098 Ribosomal S24e conserved site	1.08e-45	CE40119	rps-24		4e-48	Q962Q6	Spodoptera frugiperda	SPOFR 40S ribosomal protein S24	3e-55	6.29528	0.131344	8.83869	0.00242376	0.266188	0.266188		2.61945	0.266188	9.57957	65.1584	10.0818	14.6872		3.10849	12.5633	0.266188	3.8123	6.63894	6.54157
Mg67908	680					Minc3s00576g14506	IPR029132 Choloylglycine hydrolase/NAAA C-terminal	1.60e-13	CE01562	asah-2	Probable acid ceramidase	3e-21	Q6BHV8	Debaryomyces hansenii	DEBHA 60S ribosomal protein L39	1e-28	-5.12548e-15	1	8.70966	0.00140822	0.266188	0.266188		0.266188	0.266188	6.78555	19.1439	1.21609	8.27787		5.9508	8.46427	11.0972	22.2521	11.9496	10.7252
Mg67267	657					Minc3s00180g06917	IPR000915 60S ribosomal protein L6E IPR005568 Ribosomal protein L62C N-terminal IPR008991 Translation protein SH3-like domain superfamily IPR014722 Ribosomal protein L22C domain 2 IPR041997 Ribosomal Protein L62C KOW domain	3.80e-43	CE00744	rpl-6	60S ribosomal protein L6	7e-44	P0DJ56	Tetrahymena thermophila	60S ribosomal protein L6	2e-63	-5.12548e-15	1	8.70424	0.000737688	0.266188	0.266188		0.266188	0.266188	6.78555	21.5037	6.28223	28.4673		3.10849	11.197	14.4819	22.9613	42.3972	37.0818
Mg67487	1853	SP_NLS															7.31184	0.160905	8.70284	0.0247714	0.266188	0.266188		2.61945	3.22492	8.64823	16.7842	5.80728	55.707		1.68734	12.5633	11.7742	26.5074	62.5776	54.2345
Mg67016	1048												Q8MZS4	Physarum polycephalum	PHYPO Physarolisin	9e-54	7.90471	0.107423	8.70123	0.0286426	0.266188	0.266188		2.61945	6.18366	14.2363	33.3022	17.8394	48.0158		0.266188	13.9297	11.7742	42.8195	56.2048	61.765
Mg66683	1223					Minc3s02642g31009	IPR001461 Aspartic peptidase A1 family IPR001969 Aspartic peptidase2C active site IPR021109 Aspartic peptidase domain superfamily IPR033121 Peptidase family A1 domain	1.10e-135	CE03567	asp-4	Aspartic protease 4	2e-139	Q03168	Aedes aegypti	AEDAE Lysosomal aspartic protease	5e-158	7.31223	0.198753	8.6991	0.0413583	0.266188	0.266188		2.61945	3.22492	11.4422	85.216	18.631	71.0895		0.266188	13.9297	0.943129	1.68463	7.70107	12.817
Mg66889	444					Minc3s03747g34674	IPR004977 Ribosomal protein S25	4.20e-12	CE04691	rps-25	40S ribosomal protein S25	3e-12	Q94G66	Amaranthus	AMACR 40S ribosomal protein S25	8e-15	6.33884	0.357308	8.55018	0.0380781	0.266188	0.266188		0.266188	3.22492	3.99154	19.1439	3.27421	32.6334		1.68734	11.197	7.0356	27.2166	42.3972	34.5716
Mg68050	1918					Minc3s02306g29357	IPR000194 ATPase2C F1/V1/A1 complex2C alpha/beta subunit2C nucleotide-binding domain IPR004100 ATPase2C F1/V1/A1 complex2C alpha/beta subunit2C N-terminal domain IPR005725 ATPase2C V1 complex2C subunit A IPR020003 ATPase2C alpha/beta subunit2C nucleotide-binding domain2C active site IPR022878 V-type ATP synthase catalytic alpha chain IPR023366 ATP synthase subunit alpha2C N-terminal domain-like s…	0.0	CE22210	vha-13	V-type proton ATPase catalytic subunit A	0.0	P62914	Rattus norvegicus	60S ribosomal protein L11	0.0	-5.12548e-15	1	8.55009	0.0429978	0.266188	0.266188		0.266188	0.266188	15.1676	63.9786	11.1901	26.865		1.68734	11.197	8.38948	29.3443	2.39044	17.8373
Mg68097	559					Minc3s02676g31151	IPR002671 Ribosomal protein L22e IPR038526 Ribosomal protein L22e superfamily	3.58e-30	CE04102	rpl-22	60S ribosomal protein L22	5e-20	P67985	Sus scrofa	PIG 60S ribosomal protein L22	6e-25	-5.12548e-15	1	8.5469	0.0359756	0.266188	0.266188		0.266188	0.266188	3.0602	15.6044	5.17401	26.865		0.266188	12.5633	12.4511	17.9967	51.9563	40.847
Mg67793	326					Minc3s03763g34731	IPR001141 Ribosomal protein L27e IPR008991 Translation protein SH3-like domain superfamily IPR038655 Ribosomal protein L27e superfamily IPR041991 Eukaryotic Ribosomal Protein L272C KOW domain	1.96e-33	CE19381	rpl-27	60S ribosomal protein L27	6e-30	P41101	Solanum tuberosum	SOLTU 60S ribosomal protein L27	3e-32	6.30326	0.317226	8.38909	0.0299223	0.266188	0.266188		2.61945	0.266188	3.0602	29.7627	4.54075	41.286		4.52965	7.09792	15.1589	17.2875	49.8321	32.0615
Mg67131	431					Minc3s02676g31151	IPR002671 Ribosomal protein L22e IPR038526 Ribosomal protein L22e superfamily	6.07e-31	CE04102	rpl-22	60S ribosomal protein L22	2e-17	Q9M9W1	Arabidopsis thaliana	60S ribosomal protein L22-2	3e-24	-5.12548e-15	1	8.38446	0.00820885	0.266188	0.266188		0.266188	0.266188	18.8929	54.5397	5.64897	18.8533		3.10849	8.46427	4.32783	11.6137	2.39044	21.1841
Mg69235	442					Minc3s02189g28758	IPR001848 Ribosomal protein S10 IPR027486 Ribosomal protein S10 domain IPR036838 Ribosomal protein S10 domain superfamily	6.70e-46	CE29835	rps-20		2e-46	P55828	Drosophila melanogaster	40S ribosomal protein S20	7e-53	6.34689	0.123515	8.38407	0.00316349	0.266188	0.266188		0.266188	3.22492	2.12886	14.4245	3.43253	19.1738		3.10849	8.46427	5.00477	18.7059	27.8815	23.6943
Mg71137	635					Minc3s00132g05617	IPR000630 Ribosomal protein S8 IPR035987 Ribosomal protein S8 superfamily	9.18e-65	CE10884	rps-22		4e-61	P46793	Dictyostelium discoideum	40S ribosomal protein S15a	3e-66	7.27325	0.132134	8.38046	0.0331623	0.266188	0.266188		4.9727	0.266188	0.266188	12.0648	4.38243	25.9036		1.68734	9.83061	8.38948	22.2521	30.0057	25.3677
Mg67005	331					Minc3s02716g31313	IPR001931 Ribosomal protein S21e IPR018279 Ribosomal protein S21e2C conserved site IPR038579 Ribosomal protein S21e superfamily	1.61e-16	CE30779	rps-21	40S ribosomal protein S21	7e-14	Q6FMF8	Candida glabrata	CANGA 40S ribosomal protein S21	2e-25	-5.12548e-15	1	8.37989	0.00736117	0.266188	0.266188		0.266188	0.266188	3.0602	12.0648	2.64094	18.2124		1.68734	9.83061	3.65089	15.1598	38.1487	24.1127
Mg66689	932																6.28866	0.132544	8.3783	0.00667199	0.266188	0.266188		2.61945	0.266188	4.92288	14.4245	1.53272	15.9691		1.68734	9.83061	2.97395	17.9967	13.7198	12.817
Mg71129	1058					Minc3s00443g12390	IPR000668 Peptidase C1A2C papain C-terminal IPR025661 Cysteine peptidase2C asparagine active site IPR033157 Cathepsin X IPR038765 Papain-like cysteine peptidase superfamily	4.34e-96	CE36646	cpz-1		6e-92	Q9R1T3	Rattus norvegicus	Cathepsin Z	1e-119	7.27402	0.0630253	8.20685	0.0101834	0.266188	0.266188		4.9727	0.266188	2.12886	17.9641	2.64094	20.4556		7.37195	2.99888	13.805	22.2521	19.7385	36.2451
Mg66814	447					Minc3s01728g25907	IPR002222 Ribosomal protein S19/S15 IPR005713 Ribosomal protein S19A/S15e IPR020934 Ribosomal protein S19 conserved site IPR023575 Ribosomal protein S192C superfamily	1.03e-50	CE09945	rps-15	40S ribosomal protein S15	4e-49	Q9FY65	Arabidopsis thaliana	40S ribosomal protein S15-3	8e-60	-5.12548e-15	1	8.1943	0.00170022	0.266188	0.266188		0.266188	0.266188	18.8929	56.8994	8.97362	18.2124		3.10849	7.09792	10.4203	30.0535	2.39044	11.1435
Mg72634	674																-5.12548e-15	1	8.19229	0.0185136	0.266188	0.266188		0.266188	0.266188	0.266188	16.7842	0.899456	7.31647		3.10849	7.09792	5.68171	6.64918	17.2602	17.8373
Mg56617	376																5.95092	0.127654	8.11378	0.0373151	0.266188	0.314332		4.9727	0.266188	10.5109	0.266188	1.21609	0.586656		17.32	5.73157	13.805	1.68463	5.22278	1.93962
Mg55337	308																4.34212	0.651482	8.09413	0.0417667	0.266188	0.362475		2.61945	0.266188	51.4898	4.98562	4.69906	0.907123		32.9527	2.99888	42.2365	10.9045	13.0117	7.37829
Mg52673	359																-5.12548e-15	1	7.98596	0.0168043	0.266188	0.266188		0.266188	0.266188	15.1676	1.44605	1.21609	0.586656		5.9508	2.99888	18.5436	8.06763	1.32831	1.52127
Mg68533	2299					Minc3s01292g22540	IPR000421 Coagulation factor 5/8 C-terminal domain IPR000608 Ubiquitin-conjugating enzyme E2 IPR016135 Ubiquitin-conjugating enzyme/RWD-like	9.06e-24	CE47666	ubc-17	Probable ubiquitin-conjugating enzyme protein 17	2e-17	P05091	Homo sapiens	Aldehyde dehydrogenase, mitochondrial	3e-23	-5.12548e-15	1	7.98572	0.0139777	0.266188	0.266188		0.266188	0.266188	2.12886	16.7842	7.39045	13.7258		5.9508	2.99888	5.00477	2.39385	0.974272	3.61306
Mg73062	1868																6.34563	0.107901	7.97887	0.00333776	0.266188	0.266188		0.266188	3.22492	1.19753	10.8849	5.33233	28.4673		4.52965	4.36523	7.0356	19.4152	24.6951	24.9494
Mg66279	1083					Minc3s00727g16575	IPR000597 Ribosomal protein L3 IPR009000 Translation protein2C beta-barrel domain superfamily	1.75e-167	CE05598	rpl-3	60S ribosomal protein L3	1e-165	P39872	Bos taurus	60S ribosomal protein L3	2e-177	6.30616	0.284134	7.97878	0.0342488	0.266188	0.266188		2.61945	0.266188	6.78555	25.0432	7.8654	48.6568		4.52965	4.36523	11.0972	37.8549	65.4099	47.1224
Mg66616	1356					Minc3s00040g02293	IPR005809 Succinate--CoA synthetase2C beta subunit IPR005811 ATP-citrate lyase/succinyl-CoA ligase IPR011761 ATP-grasp fold IPR013650 ATP-grasp fold2C succinyl-CoA synthetase-type IPR013815 ATP-grasp fold2C subdomain 1 IPR016102 Succinyl-CoA synthetase-like IPR017866 Succinyl-CoA synthetase2C beta subunit2C conserved site IPR034723 Succinate--CoA ligase [ADP-forming] subunit beta2C mitochondrial	1.03e-138	CE04242	sucg-1	Succinate--CoA ligase [GDP-forming] subunit beta, mitochondrial	3e-155	Q8WWX9	Homo sapiens	Selenoprotein M	0.0	-5.12548e-15	1	7.9742	0.00132432	0.266188	0.266188		0.266188	0.266188	17.0303	41.5613	22.5889	18.2124		3.10849	5.73157	8.38948	13.0322	2.39044	16.1638
Mg71721	1492					Minc3s00062g03156	IPR001680 WD40 repeat IPR015943 WD40/YVTN repeat-like-containing domain superfamily IPR017986 WD40-repeat-containing domain IPR019775 WD40 repeat2C conserved site IPR020472 G-protein beta WD-40 repeat IPR036322 WD40-repeat-containing domain superfamily	1.48e-11	CE15999	elp-1	Echinoderm microtubule-associated protein-like elp-1	5e-15	Q8N0N3	Penaeus	PENMO Beta-1,3-glucan-binding protein	5e-66	-5.12548e-15	1	7.97341	0.00488158	0.266188	0.266188		0.266188	0.266188	0.266188	2.62591	2.64094	21.417		3.10849	5.73157	11.0972	18.7059	21.1547	16.1638
Mg66096	540					Minc3s07922g41697	IPR002130 Cyclophilin-type peptidyl-prolyl cis-trans isomerase domain IPR020892 Cyclophilin-type peptidyl-prolyl cis-trans isomerase2C conserved site IPR024936 Cyclophilin-type peptidyl-prolyl cis-trans isomerase IPR029000 Cyclophilin-like domain superfamily	1.30e-77	CE22213	cyn-1	Peptidyl-prolyl cis-trans isomerase 1	2e-76	P91791	Hemicentrotus pulcherrimus	HEMPU Peptidyl-prolyl cis-trans isomerase	2e-83	6.38262	0.0993286	7.9718	0.0235349	0.266188	0.266188		0.266188	3.22492	24.481	1.44605	2.00768	1.22759		3.10849	5.73157	2.97395	3.10307	2.39044	2.77634
Mg65955	2414					Minc3s01305g22624	IPR001930 Peptidase M12C alanine aminopeptidase/leukotriene A4 hydrolase IPR014782 Peptidase M12C membrane alanine aminopeptidase IPR024571 ERAP1-like C-terminal domain IPR034016 Aminopeptidase N-type IPR042097 Aminopeptidase N-like 2C N-terminal	1.89e-174	CE10790	pam-1	Puromycin-sensitive aminopeptidase	5e-172	Q11011	Mus musculus	Puromycin-sensitive aminopeptidase	0.0	-5.12548e-15	1	7.96489	0.0307162	0.266188	0.266188		0.266188	0.266188	10.5109	86.3959	6.12392	18.8533		0.266188	8.46427	0.943129	3.10307	8.05511	10.3068
Mg67297	571					Minc3s00152g06205	IPR000589 Ribosomal protein S15 IPR009068 S15/NS12C RNA-binding IPR012606 Ribosomal protein S13/S152C N-terminal IPR023029 Ribosomal protein S15P	6.21e-79	CE04009	rps-13	40S ribosomal protein S13	4e-77	P49393	Xenopus laevis	40S ribosomal protein S13	6e-84	-5.12548e-15	1	7.96432	0.0156223	0.266188	0.266188		0.266188	0.266188	2.12886	10.8849	4.69906	26.865		0.266188	8.46427	7.71254	14.4506	31.0678	25.7861
Mg76106	846																7.31922	0.0526769	7.96425	0.0428436	0.266188	0.266188		2.61945	3.22492	0.266188	2.62591	0.582822	6.35507		1.68734	7.09792	2.29701	9.48607	3.80661	5.70486
Mg64009	754																6.5987	0.215996	7.80034	0.044839	0.313822	0.266188		4.9727	3.22492	2.12886	15.6044	7.23214	65.962		5.9508	12.5633	13.1281	43.5287	72.1367	60.0915
Mg64345	1010	SP				Minc3s00004g00247	IPR001254 Serine proteases2C trypsin domain IPR001314 Peptidase S1A2C chymotrypsin family IPR009003 Peptidase S12C PA clan IPR018114 Serine proteases2C trypsin family2C histidine active site IPR033116 Serine proteases2C trypsin family2C serine active site	8.16e-18					Q9ER04	Mus musculus	Transmembrane protease serine 5	3e-16	-5.12548e-15	1	7.72814	0.00732095	0.266188	0.266188		0.266188	0.266188	7.71689	4.98562	10.2402	20.1352		5.9508	1.63253	5.00477	1.68463	2.39044	4.44978
Mg69941	599					Minc3s00462g12738	IPR005485 Ribosomal protein L5 eukaryotic/L18 archaeal IPR025607 Ribosomal protein L5 eukaryotic/L18 archaeal2C C-terminal	1.53e-31	CE02255	rpl-5	60S ribosomal protein L5	3e-31	O59953	Neurospora crassa	60S ribosomal protein L5	5e-38	-5.12548e-15	1	7.72083	0.015623	0.266188	0.266188		0.266188	0.266188	0.266188	3.80577	2.32431	7.95741		4.52965	2.99888	5.68171	3.8123	20.0925	9.05173
Mg69619	819																6.29087	0.104534	7.72003	0.00631474	0.266188	0.266188		2.61945	0.266188	3.99154	13.2446	1.84936	20.4556		4.52965	2.99888	4.32783	13.0322	16.1981	22.4392
Mg68020	483	SP											Q6B6N4	Haplochromis	HAPBU Proliferating cell nuclear antigen	1e-15	-5.12548e-15	1	7.71971	0.0184059	0.266188	0.266188		0.266188	0.266188	20.7556	49.8203	3.43253	15.6486		4.52965	2.99888	4.32783	21.5428	0.974272	8.63337
Mg71480	1362					Minc3s00022g01415	IPR000719 Protein kinase domain IPR000961 AGC-kinase2C C-terminal IPR011009 Protein kinase-like domain superfamily	1.21e-106	CE39615	sax-1	Serine\/threonine-protein kinase sax-1	1e-99	Q86I22	Dictyostelium discoideum	Acylpyruvase FAHD1, mitochondrial	1e-106	6.27514	0.0908629	7.71324	0.0147155	0.266188	0.266188		2.61945	0.266188	1.19753	0.266188	1.69104	15.9691		3.10849	4.36523	2.97395	2.39385	12.3036	10.7252
Mg76069	1374					Minc3s00967g19392	IPR000795 Transcription factor2C GTP-binding domain IPR004160 Translation elongation factor EFTu/EF1A2C C-terminal IPR004161 Translation elongation factor EFTu-like2C domain 2 IPR004539 Translation elongation factor EF1A2C eukaryotic/archaeal IPR009000 Translation protein2C beta-barrel domain superfamily IPR009001 Translation elongation factor EF1A/initiation factor IF2gamma2C C-terminal IPR02741…	0.0	CE01270	eef-1A.1	Elongation factor 1-alpha	0.0	Q8LPC4	Porphyra yezoensis	PORYE Elongation factor 1-alpha	0.0	7.31406	0.103955	7.70881	0.0437041	0.266188	0.266188		2.61945	3.22492	2.12886	14.4245	1.84936	64.3597		1.68734	5.73157	7.0356	8.06763	6.99299	10.7252
Mg71921	1396					Minc3s00952g19222	IPR029063 S-adenosyl-L-methionine-dependent methyltransferase IPR030384 SAM-dependent methyltransferase SMT-type	8.90e-22	CE29973	strm-1	Sterol 4-C-methyltransferase strm-1	8e-31	Q9LM02	Arabidopsis thaliana	Cycloartenol-C-24-methyltransferase	1e-114	-5.12548e-15	1	7.70874	0.0243836	0.266188	0.266188		0.266188	0.266188	1.19753	16.7842	2.16599	15.3282		1.68734	5.73157	13.805	26.5074	30.3598	13.2353
Mg66515	912					Minc3s00729g16600	IPR001045 Spermidine/spermine synthases IPR029063 S-adenosyl-L-methionine-dependent methyltransferase IPR030373 Polyamine biosynthesis domain2C conserved site IPR030374 Polyamine biosynthesis domain IPR035246 Spermidine synthase2C tetramerisation domain IPR037163 Spermidine synthase2C tetramerisation domain superfamily	1.43e-93	CE31114	spds-1		3e-95	Q09741	Schizosaccharomyces pombe	Spermidine synthase	2e-112	-5.12548e-15	1	7.70669	0.00805251	0.266188	0.266188		0.266188	0.266188	13.3049	23.8634	4.69906	19.4942		1.68734	5.73157	2.97395	4.52152	0.974272	5.2865
Mg72023	1291																-5.12548e-15	1	7.70666	0.0122884	0.266188	0.266188		0.266188	0.266188	1.19753	0.266188	1.69104	16.2896		1.68734	5.73157	1.62007	5.23074	20.8006	21.1841
Mg69424	571					Minc3s01785g26289	IPR000608 Ubiquitin-conjugating enzyme E2 IPR016135 Ubiquitin-conjugating enzyme/RWD-like IPR023313 Ubiquitin-conjugating enzyme2C active site	5.26e-79	CE03482	let-70	Ubiquitin-conjugating enzyme E2 2	3e-68	O74196	Colletotrichum	COLGL Ubiquitin-conjugating enzyme E2-16 kDa	1e-68	6.29876	0.232698	7.70465	0.0329863	0.266188	0.266188		2.61945	0.266188	3.0602	10.8849	3.43253	35.5176		0.266188	7.09792	15.8358	13.7414	20.4466	40.4287
Mg59221	260																6.27421	0.156385	7.69767	0.0401543	0.266188	0.266188		2.61945	0.266188	12.3736	8.5252	3.27421	15.9691		0.266188	7.09792	2.29701	3.10307	0.266188	4.03142
Mg70763	773																-5.12548e-15	1	7.69667	0.0496495	0.266188	0.266188		0.266188	0.266188	0.266188	2.62591	1.84936	10.5211		0.266188	7.09792	2.29701	7.3584	6.99299	8.21501
Mg67792	1823					Minc3s00774g17163	IPR008146 Glutamine synthetase2C catalytic domain IPR008147 Glutamine synthetase2C beta-Grasp domain IPR014746 Glutamine synthetase/guanido kinase2C catalytic domain IPR027302 Glutamine synthetase2C N-terminal conserved site IPR027303 Glutamine synthetase2C glycine-rich site IPR036651 Glutamine synthetase2C N-terminal domain superfamily	1.89e-162	CE24078	gln-3	Glutamine synthetase	4e-176	P51121	Xenopus laevis	Glutamine synthetase	2e-170	6.53153	0.0576868	7.59586	0.00667199	0.266188	0.29026		2.61945	3.22492	10.5109	36.8418	7.70709	30.3901		1.68734	9.83061	0.266188	5.23074	3.09852	4.86814
Mg76534	152		NXFT01003503.1.9144_g	IPR001747 Lipid transport protein 2C N-terminal IPR011030 Lipovitellin-phosvitin complex 2C superhelical domain	5.74e-73	Minc3s02166g28653	IPR001747 Lipid transport protein2C N-terminal IPR001846 von Willebrand factor2C type D domain IPR011030 Lipovitellin-phosvitin complex2C superhelical domain IPR015255 Vitellinogen2C open beta-sheet IPR015816 Vitellinogen2C beta-sheet N-terminal IPR015819 Lipid transport protein2C beta-sheet shell	6.09e-25									-3.47162	0.92662	7.49695	0.00729468	0.361455	0.506904		0.266188	0.266188	1.19753	0.266188	2.00768	7.63694		27.2681	39.8902	11.0972	0.97541	3.45257	1.52127
Mg68378	1469					Minc3s01343g22938	IPR005225 Small GTP-binding protein domain IPR006689 Small GTPase superfamily2C ARF/SAR type IPR027417 P-loop containing nucleoside triphosphate hydrolase	1.17e-106	CE17122	arf-3		3e-110	P51644	Xenopus laevis	ADP-ribosylation factor 4	3e-110	6.58022	0.0990034	7.41709	0.0191252	0.290005	0.266188		0.266188	6.18366	3.99154	67.5182	5.0157	21.7375		4.52965	5.73157	0.943129	5.23074	3.45257	5.70486
Mg71472	1431								CE47216			9e-24	P22105	Homo sapiens	Tenascin-X	8e-59	6.35801	0.105305	7.41161	0.0131988	0.266188	0.266188		0.266188	3.22492	3.0602	2.62591	2.95758	17.251		5.9508	0.266188	5.68171	15.8691	13.7198	18.2556
Mg68901	1104					Minc3s01249g22082	IPR000169 Cysteine peptidase2C cysteine active site IPR000668 Peptidase C1A2C papain C-terminal IPR013201 Cathepsin propeptide inhibitor domain (I29) IPR025660 Cysteine peptidase2C histidine active site IPR025661 Cysteine peptidase2C asparagine active site IPR038765 Papain-like cysteine peptidase superfamily IPR039417 Papain-like cysteine endopeptidase	2.66e-49	CE35305	tag-196		2e-55	P04988	Dictyostelium discoideum	Cysteine proteinase 1	2e-67	6.34874	0.131548	7.40929	0.0152228	0.266188	0.266188		0.266188	3.22492	2.12886	7.34534	3.74916	29.1083		5.9508	0.266188	7.0356	13.0322	23.987	23.2759
Mg71593	1250					Minc3s01335g22883	IPR007632 Anoctamin IPR032394 Anoctamin2C dimerisation domain	5.73e-26	CE46692	anoh-2	Anoctamin	7e-30	Q6PB70	Mus musculus	Anoctamin-8	2e-33	6.27699	0.168207	7.40548	0.0486584	0.266188	0.266188		2.61945	0.266188	0.266188	17.9641	0.899456	14.3668		4.52965	1.63253	3.65089	4.52152	7.70107	6.95993
Mg74360	623																-5.12548e-15	1	7.39684	0.0317825	0.266188	0.266188		0.266188	0.266188	0.266188	3.80577	2.16599	8.59834		3.10849	2.99888	1.62007	7.3584	11.2415	11.1435
Mg66324	1380					Minc3s00810g17641	IPR000594 THIF-type NAD/FAD binding fold IPR014929 E2 binding IPR023318 Ubiquitin activating enzyme2C alpha domain superfamily IPR030468 NEDD8-activating enzyme E1 catalytic subunit IPR033127 Ubiquitin-activating enzyme E12C Cys active site IPR035985 Ubiquitin-activating enzyme	5.32e-97	CE34538	rfl-1	NEDD8-activating enzyme E1 catalytic subunit	4e-103	Q945U1	Elaeis oleifera	ELAOL 40S ribosomal protein S15	3e-127	-5.12548e-15	1	7.39677	0.0142118	0.266188	0.266188		0.266188	0.266188	9.57957	21.5037	4.0658	20.7761		3.10849	2.99888	2.97395	15.8691	1.68236	8.63337
Mg66756	774					Minc3s03181g33066	IPR004978 Stanniocalcin	1.25e-17	CE40427			1e-11					6.28851	0.097268	7.39676	0.00987405	0.266188	0.266188		2.61945	0.266188	0.266188	2.62591	2.79926	24.3012		3.10849	2.99888	2.97395	5.93996	24.6951	20.7658
Mg73420	833					Minc3s00253g08642	IPR001179 FKBP-type peptidyl-prolyl cis-trans isomerase domain IPR023566 Peptidyl-prolyl cis-trans isomerase2C FKBP-type	1.35e-22	CE21417	fkb-2	Peptidylprolyl isomerase	2e-22	Q54T02	Dictyostelium discoideum	ABC transporter G family member 24	1e-29	6.3528	0.215022	7.39675	0.0490707	0.266188	0.266188		0.266188	3.22492	0.266188	9.70506	1.53272	19.8147		3.10849	2.99888	3.65089	16.5783	24.6951	19.0923
Mg75627	617					Minc3s01320g22745	IPR005756 Ribosomal protein L26/L242C eukaryotic/archaeal IPR005824 KOW IPR005825 Ribosomal protein L24/L262C conserved site IPR008991 Translation protein SH3-like domain superfamily IPR014722 Ribosomal protein L22C domain 2 IPR041988 Ribosomal Protein L26/L242C KOW domain	1.46e-43	CE03278	rpl-26	60S ribosomal protein L26	6e-46	P51414	Arabidopsis thaliana	60S ribosomal protein L26-1	9e-55	-5.12548e-15	1	7.3967	0.0304081	0.266188	0.266188		0.266188	0.266188	2.12886	16.7842	3.59084	28.1469		3.10849	2.99888	8.38948	15.1598	48.4159	21.6025
Mg69636	439					Minc3s01825g26564	IPR001854 Ribosomal protein L29/L35 IPR018254 Ribosomal protein L292C conserved site IPR036049 Ribosomal protein L29/L35 superfamily	2.51e-26	CE00450	rpl-35	60S ribosomal protein L35	8e-31	Q9M3D2	Arabidopsis thaliana	60S ribosomal protein L35-3	1e-39	-5.12548e-15	1	7.39669	0.00726878	0.266188	0.266188		0.266188	0.266188	6.78555	14.4245	3.59084	29.4287		3.10849	2.99888	11.0972	26.5074	31.7759	26.2045
Mg67725	1897																6.29948	0.215973	7.39145	0.0417667	0.266188	0.266188		2.61945	0.266188	2.12886	7.34534	1.69104	27.5059		1.68734	4.36523	9.74336	22.9613	46.2916	33.3166
Mg71723	1697																6.29758	0.198753	7.39109	0.0357524	0.266188	0.266188		2.61945	0.266188	1.19753	10.8849	3.74916	25.9036		1.68734	4.36523	3.65089	22.2521	32.13	34.1533
Mg72344	614																6.29513	0.110325	7.39065	0.00955989	0.266188	0.266188		2.61945	0.266188	2.12886	9.70506	2.79926	23.6603		1.68734	4.36523	7.71254	22.2521	25.4032	23.6943
Mg70464	831					Minc3s00925g18947	IPR000668 Peptidase C1A2C papain C-terminal IPR025660 Cysteine peptidase2C histidine active site IPR038765 Papain-like cysteine peptidase superfamily	1.54e-35	CE14682	cpr-5	Cathepsin B-like cysteine proteinase 5	4e-52	P25792	Schistosoma mansoni	SCHMA Cathepsin B-like cysteine proteinase	1e-62	-5.12548e-15	1	7.39044	0.00339912	0.266188	0.266188		0.266188	0.266188	3.0602	9.70506	5.49065	17.251		1.68734	4.36523	8.38948	22.2521	21.8628	24.531
Mg66356	755																-5.12548e-15	1	7.3896	0.0253251	0.266188	0.266188		0.266188	0.266188	18.8929	7.34534	4.69906	6.67554		1.68734	4.36523	2.97395	1.68463	45.2295	1.10291
Mg66125	593					Minc3s00715g16462	IPR000552 Ribosomal protein L44e IPR011332 Zinc-binding ribosomal protein	1.25e-34	CE02131	rpl-36.A	Ribosomal protein rpl-36.A	6e-28	Q96499	Gossypium hirsutum	GOSHI 60S ribosomal protein L44	4e-30	6.30037	0.213174	7.38658	0.0404344	0.266188	0.266188		2.61945	0.266188	3.99154	15.6044	3.11589	24.3012		0.266188	5.73157	14.4819	24.3797	45.9376	29.5513
Mg67212	418					Minc3s09457g43222	IPR002674 Ribosomal protein L37ae IPR011331 Ribosomal protein L37ae/L37e IPR011332 Zinc-binding ribosomal protein	3.45e-46	CE22117	rpl-43	60S ribosomal protein L37a	6e-32	Q9VMU4	Drosophila melanogaster	60S ribosomal protein L37a	8e-35	7.35972	0.0697936	7.38455	0.0367829	0.266188	0.266188		0.266188	6.18366	5.85422	59.2591	8.18204	24.6217		0.266188	5.73157	0.266188	0.97541	8.7632	11.9802
Mg68056	1103					Minc3s01785g26289	IPR000608 Ubiquitin-conjugating enzyme E2 IPR016135 Ubiquitin-conjugating enzyme/RWD-like IPR023313 Ubiquitin-conjugating enzyme2C active site	5.36e-86	CE03482	let-70	Ubiquitin-conjugating enzyme E2 2	2e-85	P35129	Caenorhabditis elegans	Ubiquitin-conjugating enzyme E2 2	3e-84	-5.12548e-15	1	7.38435	0.0167751	0.266188	0.266188		0.266188	0.266188	8.64823	75.7772	7.07382	20.4556		0.266188	5.73157	0.943129	0.97541	5.57682	4.03142
Mg66558	328					Minc3s00187g07086	IPR001569 Ribosomal protein L37e IPR011331 Ribosomal protein L37ae/L37e IPR011332 Zinc-binding ribosomal protein IPR018267 Ribosomal protein L37e2C conserved site	6.16e-33	CE18312		Ribosomal protein L37	7e-21	Q54MG6	Dictyostelium discoideum	60S ribosomal protein L37	3e-32	6.29424	0.105188	7.38427	0.00876744	0.266188	0.266188		2.61945	0.266188	2.12886	4.98562	4.0658	23.6603		0.266188	5.73157	8.38948	19.4152	25.7572	23.2759
Mg66660	1628								CE36917			9e-11					-5.12548e-15	1	7.38413	0.0305028	0.266188	0.266188		0.266188	0.266188	18.8929	19.1439	19.8975	27.5059		0.266188	5.73157	2.97395	10.1953	0.974272	13.6537
Mg68310	1357												P34090	Dictyostelium discoideum	Conditioned medium factor	5e-64	7.26684	0.0644958	7.384	0.0329863	0.266188	0.266188		4.9727	0.266188	20.7556	19.1439	6.9155	27.8264		0.266188	5.73157	8.38948	11.6137	0.974272	13.6537
Mg67765	498					Minc3s06302g39640	IPR002675 Ribosomal protein L38e IPR038464 Ribosomal protein L38e superfamily	1.35e-28	CE20485	rpl-38	60S ribosomal protein L38	1e-26	Q95V84	Branchiostoma belcheri	BRABE 60S ribosomal protein L38	2e-30	-5.12548e-15	1	7.38308	0.0271521	0.266188	0.266188		0.266188	0.266188	11.4422	53.3598	7.54877	14.3668		0.266188	5.73157	0.266188	4.52152	7.34703	4.44978
Mg66164	413								CE26658	rla-1	60S acidic ribosomal protein P1	3e-12	P29763	Chlamydomonas reinhardtii	CHLRE 60S acidic ribosomal protein P1	6e-14	-5.12548e-15	1	7.38274	0.0242843	0.266188	0.266188		0.266188	0.266188	2.12886	7.34534	1.69104	17.8919		0.266188	5.73157	7.0356	15.8691	27.1734	12.817
Mg69454	417					Minc3s02716g31313	IPR001931 Ribosomal protein S21e IPR018279 Ribosomal protein S21e2C conserved site IPR038579 Ribosomal protein S21e superfamily	5.10e-29	CE30779	rps-21	40S ribosomal protein S21	3e-29	Q962Q8	Spodoptera frugiperda	SPOFR 40S ribosomal protein S21	2e-32	-5.12548e-15	1	7.38189	0.0453159	0.266188	0.266188		0.266188	0.266188	2.12886	52.18	5.9656	15.6486		0.266188	5.73157	0.266188	0.266188	5.93086	5.2865
Mg71324	767	SP_NLS															-5.12548e-15	1	7.38032	0.0406918	0.266188	0.266188		0.266188	0.266188	2.12886	40.3814	2.95758	8.27787		0.266188	5.73157	0.266188	1.68463	4.86873	9.47009
Mg73306	251					Minc3s00104g04657	IPR000077 Ribosomal protein L39e IPR020083 Ribosomal protein L39e2C conserved site IPR023626 Ribosomal protein L39e domain superfamily	9.20e-21	CE06883	rpl-39	60S ribosomal protein L39	3e-17	Q98TF5	Gallus gallus	60S ribosomal protein L39	2e-23	6.36767	0.135308	7.37997	0.0313097	0.266188	0.266188		0.266188	3.22492	0.266188	7.34534	2.00768	6.996		0.266188	5.73157	7.0356	6.64918	15.844	12.817
Mg73189	690																-5.12548e-15	1	7.37968	0.0486584	0.266188	0.266188		0.266188	0.266188	0.266188	9.70506	1.37441	10.5211		0.266188	5.73157	2.97395	2.39385	16.5521	13.6537
Mg69437	254																-5.12548e-15	1	7.37961	0.0458883	0.266188	0.266188		0.266188	0.266188	2.12886	36.8418	2.64094	8.59834		0.266188	5.73157	0.266188	1.68463	6.63894	4.03142
Mg67186	321					Minc3s00314g09994	IPR002673 Ribosomal protein L29e	2.29e-21	CE15559	rpl-29	60S ribosomal protein L29	4e-17	Q8HXB8	Macaca fascicularis	MACFA 60S ribosomal protein L29	2e-16	-5.12548e-15	1	7.37908	0.0404226	0.266188	0.266188		0.266188	0.266188	11.4422	32.1224	2.79926	5.0732		0.266188	5.73157	0.266188	3.10307	0.974272	3.61306
Mg66069	949					Minc3s00822g17768	IPR002164 Nucleosome assembly protein (NAP) IPR037231 NAP-like superfamily	3.45e-43	CE03030	spr-2	Suppressor of presenilin-2	4e-24	Q01105	Homo sapiens	Protein SET	6e-48	-5.12548e-15	1	7.37874	0.0424909	0.266188	0.266188		0.266188	0.266188	9.57957	33.3022	2.16599	8.27787		0.266188	5.73157	0.266188	0.266188	0.62023	1.93962
Mg71241	770	SP															-5.12548e-15	1	7.37872	0.041199	0.266188	0.266188		0.266188	0.266188	1.19753	2.62591	1.05777	8.59834		0.266188	5.73157	1.62007	8.77685	10.5334	14.072
Mg70857	1211					Minc3s01655g25377	IPR006089 Acyl-CoA dehydrogenase2C conserved site IPR006091 Acyl-CoA oxidase/dehydrogenase2C central domain IPR009075 Acyl-CoA dehydrogenase/oxidase C-terminal IPR009100 Acyl-CoA dehydrogenase/oxidase2C N-terminal and middle domain superfamily IPR013786 Acyl-CoA dehydrogenase/oxidase2C N-terminal IPR036250 Acyl-CoA dehydrogenase-like2C C-terminal IPR037069 Acyl-CoA dehydrogenase/oxidase2C N-termi…	5.62e-123	CE01217	acdh-12	Probable acyl-CoA dehydrogenase	2e-109	Q54BC8	Dictyostelium discoideum	Proteasome subunit beta type-5	6e-119	-5.12548e-15	1	7.37683	0.0499473	0.266188	0.266188		0.266188	0.266188	5.85422	9.70506	5.9656	5.0732		0.266188	5.73157	1.62007	4.52152	0.974272	2.77634
Mg53568	348																6.10956	0.0629228	7.28082	0.0206811	0.313822	0.266188		0.266188	6.18366	7.71689	6.16548	1.21609	3.47086		7.37195	5.73157	2.97395	11.6137	5.57682	6.95993
Mg70030	1992																7.0985	0.0884646	7.18808	0.0469676	0.266188	0.29026		4.9727	3.22492	2.12886	23.8634	4.69906	39.0427		1.68734	7.09792	9.74336	24.3797	39.2108	35.8267
Mg45720	1066					Minc3s01037g20080	IPR000169 Cysteine peptidase2C cysteine active site IPR000668 Peptidase C1A2C papain C-terminal IPR013201 Cathepsin propeptide inhibitor domain (I29) IPR025660 Cysteine peptidase2C histidine active site IPR025661 Cysteine peptidase2C asparagine active site IPR038765 Papain-like cysteine peptidase superfamily IPR039417 Papain-like cysteine endopeptidase	2.43e-22	CE16333	cpl-1		1e-20	Q24940	Fasciola	FASHE Cathepsin L-like proteinase	4e-28	7.24346	0.0529468	7.14337	0.0388995	0.409089	0.266188		7.32596	20.9773	52.4211	98.1945	3.74916	16.9305		5.9508	19.395	30.0516	86.7912	94.4414	48.3775
Mg50259	413					Minc3s02447g30087	IPR000218 Ribosomal protein L14P IPR019972 Ribosomal protein L14P2C conserved site IPR036853 Ribosomal protein L14 superfamily	1.28e-64	CE00778	rpl-23	60S ribosomal protein L23	3e-62	Q5REU2	Pongo abelii	60S ribosomal protein L23	5e-64	6.39604	0.0606521	7.04833	0.0453127	0.409089	0.266188		14.3857	0.266188	18.8929	27.4029	0.582822	2.50946		0.266188	23.4941	11.0972	8.77685	4.51469	6.12322
Mg66118	634					Minc3s00361g10991	IPR000406 Rho protein GDP-dissociation inhibitor IPR014756 Immunoglobulin E-set IPR024792 Rho GDP-dissociation inhibitor domain superfamily	3.13e-34	CE04595	rhi-1	Probable rho GDP-dissociation inhibitor	4e-31	Q25145	Haliotis rufescens	HALRU Tropomyosin	1e-64	-1.95273	1	7.02337	0.0267624	0.361455	0.266188		0.266188	0.266188	20.7556	40.3814	4.38243	30.3901		8.7931	8.46427	7.0356	10.1953	0.974272	11.1435
Mg66773	1473					Minc3s00208g07594	IPR001806 Small GTPase IPR005225 Small GTP-binding protein domain IPR027417 P-loop containing nucleoside triphosphate hydrolase	1.45e-92	CE03777	rab-7		1e-93	P51150	Mus musculus	Ras-related protein Rab-7a	2e-97	6.28401	0.150603	6.99813	0.0443759	0.266188	0.266188		2.61945	0.266188	12.3736	49.8203	1.21609	9.23928		4.52965	0.266188	0.266188	2.39385	1.68236	4.44978
Mg70186	897					Minc3s07698g41422	IPR002223 Pancreatic trypsin inhibitor Kunitz domain IPR020901 Proteinase inhibitor I22C Kunitz2C conserved site IPR036880 Pancreatic trypsin inhibitor Kunitz domain superfamily	3.60e-15	CE17536	mig-6	Papilin	2e-14	P00994	Helix pomatia	HELPO Isoinhibitor K	1e-15	-5.12548e-15	1	6.98947	0.0150466	0.266188	0.266188		0.266188	0.266188	1.19753	2.62591	1.84936	7.95741		3.10849	1.63253	5.68171	14.4506	16.5521	12.3986
Mg72790	699																-5.12548e-15	1	6.98927	0.0245452	0.266188	0.266188		0.266188	0.266188	0.266188	2.62591	2.48263	18.8533		3.10849	1.63253	4.32783	7.3584	18.6764	12.3986
Mg71935	577																-5.12548e-15	1	6.98908	0.0288346	0.266188	0.266188		0.266188	0.266188	0.266188	3.80577	2.32431	14.0463		3.10849	1.63253	4.32783	14.4506	11.5955	22.8576
Mg70994	655																-5.12548e-15	1	6.98895	0.0246136	0.266188	0.266188		0.266188	0.266188	2.12886	22.6835	2.64094	13.7258		3.10849	1.63253	5.68171	7.3584	19.7385	6.95993
Mg69422	1391																-5.12548e-15	1	6.98099	0.015946	0.266188	0.266188		0.266188	0.266188	3.99154	16.7842	4.22411	30.3901		1.68734	2.99888	5.68171	13.7414	17.9683	22.4392
Mg66434	1262																6.29396	0.0922049	6.98097	0.0150466	0.266188	0.266188		2.61945	0.266188	6.78555	8.5252	2.64094	23.3398		1.68734	2.99888	5.68171	22.9613	20.0925	22.4392
Mg70106	1307																6.29148	0.0921718	6.98072	0.0156509	0.266188	0.266188		2.61945	0.266188	1.19753	4.98562	3.74916	28.1469		1.68734	2.99888	4.32783	14.4506	24.341	17.4189
Mg70171	1260																6.28477	0.105778	6.98011	0.023243	0.266188	0.266188		2.61945	0.266188	1.19753	10.8849	1.69104	13.7258		1.68734	2.99888	3.65089	8.77685	17.9683	17.4189
Mg67190	2272					Minc3s01693g25659	IPR007718 Srp402C C-terminal IPR039191 Srp40/Nopp140	3.77e-11									6.28405	0.0772258	6.98005	0.0147903	0.266188	0.266188		2.61945	0.266188	10.5109	40.3814	6.28223	11.1621		1.68734	2.99888	0.266188	1.68463	5.93086	2.77634
Mg71456	909												Q9C005	Homo sapiens	Protein dpy-30 homolog	2e-12	-5.12548e-15	1	6.97971	0.0316014	0.266188	0.266188		0.266188	0.266188	0.266188	4.98562	2.16599	14.3668		1.68734	2.99888	7.0356	4.52152	16.1981	12.817
Mg68509	891								CE33558	hsp-25		1e-10					-5.12548e-15	1	6.97922	0.0300222	0.266188	0.266188		0.266188	0.266188	4.92288	29.7627	3.90748	7.31647		1.68734	2.99888	0.266188	0.266188	4.16065	4.44978
Mg69365	825					Minc3s02882g31948	IPR000169 Cysteine peptidase2C cysteine active site IPR000668 Peptidase C1A2C papain C-terminal IPR025660 Cysteine peptidase2C histidine active site IPR025661 Cysteine peptidase2C asparagine active site IPR038765 Papain-like cysteine peptidase superfamily	2.58e-54	CE31896	cpr-1	Gut-specific cysteine proteinase	4e-75	Q54QD9	Dictyostelium discoideum	Cathepsin B	4e-85	-5.12548e-15	1	6.97879	0.0336824	0.266188	0.266188		0.266188	0.266188	2.12886	8.5252	8.34035	8.91881		1.68734	2.99888	1.62007	3.8123	2.0364	4.86814
Mg50445	156		NXFT01002063.1.532_g	IPR007284 Ground-like domain	2.25e-32												-5.12548e-15	1	6.97775	0.00328325	0.266188	0.266188		0.266188	0.266188	31.9317	19.1439	23.2221	16.9305		0.266188	4.36523	27.3438	25.0889	46.6457	31.2248
Mg66328	563					Minc3s00185g07042	IPR002672 Ribosomal protein L28e IPR029004 Ribosomal L28e/Mak16	7.01e-17					P17702	Rattus norvegicus	60S ribosomal protein L28	6e-22	-5.12548e-15	1	6.97503	0.0369263	0.266188	0.266188		0.266188	0.266188	17.0303	79.3167	8.18204	25.2626		0.266188	4.36523	0.266188	1.68463	6.63894	4.44978
Mg66170	258																-5.12548e-15	1	6.97331	0.042849	0.266188	0.266188		0.266188	0.266188	6.78555	71.0577	6.59887	16.61		0.266188	4.36523	0.266188	0.266188	4.16065	6.54157
Mg70032	1142																6.28837	0.108388	6.97221	0.0220357	0.266188	0.266188		2.61945	0.266188	1.19753	2.62591	2.32431	15.0077		0.266188	4.36523	5.00477	17.9967	16.5521	25.7861
Mg71269	850																6.27148	0.120191	6.96803	0.046544	0.266188	0.266188		2.61945	0.266188	0.266188	1.44605	1.53272	9.23928		0.266188	4.36523	2.97395	6.64918	12.6577	9.47009
Mg66010	1181																5.4976	0.192647	6.9228	0.0249647	0.266188	0.29026		2.61945	0.266188	9.57957	21.5037	2.00768	15.9691		1.68734	5.73157	5.00477	4.52152	0.974272	6.95993
Mg67476	1042																5.51108	0.243819	6.91981	0.0198329	0.266188	0.29026		2.61945	0.266188	4.92288	6.16548	2.00768	26.865		0.266188	7.09792	9.74336	17.2875	20.4466	23.2759
Mg44771	902		NXFT01001030.1.2689_g		3.34e-177												2.09911	0.772908	6.77115	0.0329863	0.575806	0.530976		2.61945	0.266188	0.266188	0.266188	6.44055	7.95741		18.7412	48.0883	25.9899	0.266188	0.266188	0.266188
Mg51430	640					Minc3s00804g17567	IPR000866 Alkyl hydroperoxide reductase subunit C/ Thiol specific antioxidant IPR013766 Thioredoxin domain IPR019479 Peroxiredoxin2C C-terminal IPR036249 Thioredoxin-like superfamily	1.48e-57	CE41559	prdx-2		2e-58	Q61171	Mus musculus	Peroxiredoxin-2	9e-68	-1.28501	1	6.68134	0.015086	0.313822	0.266188		0.266188	0.266188	23.5496	63.9786	28.7632	16.61		0.266188	8.46427	11.0972	10.1953	5.22278	15.7455
Mg52125	504												Q27052	Trypanosoma	TRYRA Flagellar calcium-binding protein	3e-19	5.96953	0.105875	6.67646	0.0390448	0.313822	0.266188		4.9727	0.266188	6.78555	8.5252	0.582822	2.50946		0.266188	8.46427	11.7742	13.7414	23.2789	2.77634
Mg67376	1800					Minc3s00021g01350	IPR012725 Chaperone DnaK IPR013126 Heat shock protein 70 family IPR029047 Heat shock protein 70kD2C peptide-binding domain superfamily IPR029048 Heat shock protein 70kD2C C-terminal domain superfamily	0.0	CE08631	hsp-6	Heat shock 70 kDa protein F, mitochondrial	0.0	Q11KJ6	Mesorhizobium	MESSB Chaperone protein DnaK	0.0	6.59505	0.0596701	6.62109	0.0344877	0.266188	0.29026		0.266188	6.18366	6.78555	23.8634	16.4145	11.1621		4.52965	1.63253	0.266188	5.93996	2.74448	6.12322
Mg22629	462																5.91967	0.0625896	6.44102	0.0434595	0.361455	0.266188		4.9727	3.22492	11.4422	14.4245	0.424505	3.47086		5.9508	5.73157	2.97395	10.9045	5.93086	1.93962
Mg69497	1146																-5.12548e-15	1	6.40527	0.0444942	0.266188	0.266188		0.266188	0.266188	2.12886	2.62591	1.53272	11.4825		1.68734	1.63253	2.97395	8.77685	15.844	10.3068
Mg66490	267					Minc3s00665g15823	IPR001209 Ribosomal protein S14 IPR018271 Ribosomal protein S142C conserved site IPR039744 40S ribosomal protein S29/30S ribosomal protein S14 type Z	6.66e-17	CE26849	rps-29		3e-20	Q6FWE3	Candida glabrata	CANGA 40S ribosomal protein S29	9e-20	-5.12548e-15	1	6.40522	0.0324727	0.266188	0.266188		0.266188	0.266188	4.92288	7.34534	2.48263	16.9305		1.68734	1.63253	4.32783	8.77685	26.1113	10.7252
Mg73099	713																-5.12548e-15	1	6.3958	0.0415025	0.266188	0.266188		0.266188	0.266188	2.12886	7.34534	4.22411	21.417		0.266188	2.99888	8.38948	8.77685	26.4653	13.2353
Mg6398	5411		NXFT01003503.1.9144_g	IPR001747 Lipid transport protein 2C N-terminal IPR011030 Lipovitellin-phosvitin complex 2C superhelical domain	4.49e-163	Minc3s02166g28653	IPR001747 Lipid transport protein2C N-terminal IPR001846 von Willebrand factor2C type D domain IPR011030 Lipovitellin-phosvitin complex2C superhelical domain IPR015255 Vitellinogen2C open beta-sheet IPR015816 Vitellinogen2C beta-sheet N-terminal IPR015819 Lipid transport protein2C beta-sheet shell	6.53e-93									0.877545	0.992256	6.2193	0.0364612	0.671073	1.25312		2.61945	0.266188	0.266188	0.266188	2.16599	19.4942		21.5835	84.9797	17.8666	1.68463	2.0364	3.1947
Mg34063	843																5.39103	0.0535211	6.20264	0.0268156	0.55199	0.266188		4.9727	9.14239	5.85422	30.9425	0.741139	4.43226		5.9508	18.0287	8.38948	5.93996	10.8874	5.2865
Mg68898	1128					Minc3s03424g33801	IPR001806 Small GTPase IPR005225 Small GTP-binding protein domain IPR027417 P-loop containing nucleoside triphosphate hydrolase	7.42e-102	CE16905	rab-1		6e-101	Q01890	Phytophthora infestans	PHYIN Ras-like GTP-binding protein YPT1	5e-100	-0.783357	1	6.19691	0.0335221	0.266188	0.29026		0.266188	0.266188	3.0602	8.5252	1.69104	16.61		1.68734	2.99888	7.71254	14.4506	17.2602	13.6537
Mg68870	1308					Minc3s00981g19546	IPR002208 SecY/SEC61-alpha family IPR019561 Translocon Sec61/SecY2C plug domain IPR023201 SecY domain superfamily IPR030659 SecY conserved site	0.0	CE14954	sec-61		0.0	Q28960	Sus scrofa	PIG Carbonyl reductase [NADPH] 1	0.0	-1.28411	1	6.11268	0.0380781	0.313822	0.266188		0.266188	0.266188	4.92288	23.8634	8.18204	11.4825		3.10849	2.99888	2.97395	17.2875	1.68236	6.54157
Mg66044	461																-1.66223	1	6.071	0.0324724	0.266188	0.338403		0.266188	0.266188	9.57957	8.5252	1.53272	1.54806		7.37195	0.266188	32.0824	8.77685	16.5521	6.95993
Mg74182	152		NXFT01001972.1.5108_g	IPR002486 Nematode cuticle collagen 2C N-terminal IPR008160 Collagen triple helix repeat	5.74e-73												4.19366	0.138517	6.01763	0.015946	1.36176	0.819835		26.152	3.22492	1105.76	454.512	834.755	567.814		17.32	91.8114	354.306	457.005	1257.82	1122.31
Mg37421	946												P23098	Tripneustes	TRIGR Dynein beta chain, ciliary	2e-56	5.23112	0.0658086	5.90845	0.0296938	0.647257	0.266188		9.67922	6.18366	24.481	29.7627	0.899456	5.71413		5.9508	19.395	17.8666	18.7059	27.5274	16.1638
Mg33477	876		NXFT01003264.1.8482_g		2.44e-14												2.97655	0.574994	5.88397	0.0441293	0.528173	0.627262		4.9727	0.266188	0.266188	0.266188	23.0638	24.3012		10.2143	28.9595	15.8358	0.266188	19.3845	48.7958
Mg20677	1213		NXFT01000441.1.1041_g	IPR002557 Chitin binding domain IPR036508 Chitin binding domain superfamily	0.0	Minc3s02424g29957	IPR002557 Chitin binding domain IPR036508 Chitin binding domain superfamily	2.06e-53									0.0181859	1	5.87471	0.0197442	1.05214	2.09563		0.266188	3.22492	3.0602	2.62591	27.0218	37.7609		58.5334	97.2768	40.2057	1.68463	3.09852	5.2865
Mg25468	286					Minc3s01153g21227	IPR000626 Ubiquitin domain IPR002906 Ribosomal protein S27a IPR011332 Zinc-binding ribosomal protein IPR019956 Ubiquitin IPR029071 Ubiquitin-like domain superfamily IPR038582 S27a-like superfamily	1.92e-32					P79781	Gallus gallus	Ubiquitin-40S ribosomal protein S27a	2e-25	5.52945	0.0793428	5.62752	0.0424909	0.409089	0.314332		7.32596	3.22492	3.0602	1.44605	0.582822	1.22759		1.68734	9.83061	4.32783	35.018	22.9249	109.876
Mg871	3538		NXFT01002747.1.7215_g		0.0	Minc3s00100g04558	IPR001507 Zona pellucida domain	0.0	CE39963	cutl-6		8e-113	Q03755	Caenorhabditis elegans	Cuticlin-1	3e-36	3.89622	0.120383	5.34283	0.04037	3.43382	2.1197		68.5107	3.22492	2043.62	1414.92	1417.2	1539.15		25.8469	179.258	996.046	944.949	3170	1904.64
Mg4081	3034		NXFT01001972.1.5108_g	IPR002486 Nematode cuticle collagen 2C N-terminal IPR008160 Collagen triple helix repeat	1.74e-60	Minc3s01827g26570	IPR002486 Nematode cuticle collagen2C N-terminal IPR008160 Collagen triple helix repeat	1.85e-19									3.98179	0.143567	5.16588	0.0350457	1.93336	0.988336		33.2118	3.22492	687.594	283.432	658.865	400.53		13.0566	74.0489	294.058	364.097	791.904	892.208
Mg36580	1257	SP_NLS	NXFT01000681.1.1628_g		0.0	Minc3s00628g15326		8.83e-85									2.23671	0.54402	5.06042	0.0362471	0.790157	1.32534		7.32596	0.266188	3.99154	0.266188	14.8314	13.4054		14.4777	39.8902	17.8666	1.68463	3.80661	14.9088
Mg12173	1022	SP	NXFT01002043.1.5312_g	IPR006108 3-hydroxyacyl-CoA dehydrogenase 2C C-terminal IPR006176 3-hydroxyacyl-CoA dehydrogenase 2C NAD binding IPR006180 3-hydroxyacyl-CoA dehydrogenase 2C conserved site IPR008927 6-phosphogluconate dehydrogenase-like 2C C-terminal domain superfamily IPR013328 6-phosphogluconate dehydrogenase 2C domain 2 IPR022694 3-hydroxyacyl-CoA dehydrogenase IPR036291 NAD(P)-binding domain superfamily	0.0	Minc3s01240g21991	IPR006108 3-hydroxyacyl-CoA dehydrogenase2C C-terminal IPR006176 3-hydroxyacyl-CoA dehydrogenase2C NAD binding IPR006180 3-hydroxyacyl-CoA dehydrogenase2C conserved site IPR008927 6-phosphogluconate dehydrogenase-like2C C-terminal domain superfamily IPR013328 6-phosphogluconate dehydrogenase2C domain 2 IPR022694 3-hydroxyacyl-CoA dehydrogenase IPR036291 NAD(P)-binding domain superfamily	3.29e-57	CE00852		Probable 3-hydroxyacyl-CoA dehydrogenase B0272.3	3e-41	P43509	Caenorhabditis elegans	Cathepsin B-like cysteine proteinase 5	4e-40	2.71689	0.318973	4.84657	0.023243	1.71901	2.2882		21.4455	0.266188	36.5884	55.7196	233.625	185.496		21.5835	79.5143	48.329	17.2875	245.263	350.014
Mg5	171		NXFT01004256.1.11035_g		8.45e-77												3.22541	0.112119	4.6459	0.0253383	1.14741	0.74762		7.32596	6.18366	5.85422	8.5252	1.53272	2.18899		20.1623	15.296	5.00477	3.8123	1.68236	1.93962
Mg32431	1126		NXFT01001358.1.3446_g	IPR019402 Frag1/DRAM/Sfk1 IPR032990 DNA damage-regulated autophagy modulator protein 2 IPR036865 CRAL-TRIO lipid binding domain superfamily	0.0	Minc3s01351g23029	IPR001251 CRAL-TRIO lipid binding domain IPR036865 CRAL-TRIO lipid binding domain superfamily	6.10e-121	CE40606		CRAL-TRIO domain-containing protein C34C12.6	5e-28	Q9R1P4	Mus musculus	Proteasome subunit alpha type-1	8e-27	2.95838	0.155947	4.2245	0.0152228	1.24268	0.675405		0.266188	12.1011	17.0303	4.98562	26.3885	34.5562		14.4777	12.5633	5.68171	14.4506	5.93086	14.9088
Mg25303	3122		NXFT01002397.1.6378_g	IPR002557 Chitin binding domain IPR036508 Chitin binding domain superfamily	0.0	Minc3s00100g04562	IPR002557 Chitin binding domain IPR036508 Chitin binding domain superfamily	4.13e-132									-0.159683	1	3.97478	0.0276789	1.95718	1.4457		2.61945	0.266188	9.57957	6.16548	4.69906	8.27787		13.0566	33.0585	10.4203	4.52152	2.39044	3.1947
Mg31070	1743		NXFT01001208.1.261_g		0.0	Minc3s01603g25042		0.0	CE15698	tag-297		0.0					1.35403	0.202844	3.8148	3.35109e-07	4.31504	3.41957		7.32596	12.1011	2.12886	6.16548	317.058	318.49		54.27	48.0883	28.0208	30.7627	61.1614	57.5814
Mg35626	688		NXFT01000702.1.1672_g		2.73e-122												3.2726	0.0650938	3.38878	0.0201211	0.647257	0.651334		7.32596	0.266188	8.64823	2.62591	73.8836	69.1667		3.10849	5.73157	2.97395	4.52152	40.2729	26.6228
Mg15630	1443		NXFT01003135.1.8160_g		0.0	Minc3s02564g30660	IPR036612 K Homology domain2C type 1 superfamily	9.06e-161									1.791	0.233658	3.15635	0.0140446	3.02893	1.97527		9.67922	6.18366	5.85422	14.4245	27.8133	22.6989		11.6354	28.9595	17.1897	4.52152	18.3223	17.4189
Mg18655	3638		NXFT01004081.1.10682_g	IPR001223 Glycoside hydrolase family 18 2C catalytic domain IPR017853 Glycoside hydrolase superfamily IPR029070 Chitinase insertion domain superfamily	0.0	Minc3s00874g18343	IPR001223 Glycoside hydrolase family 182C catalytic domain IPR011583 Chitinase II IPR017853 Glycoside hydrolase superfamily IPR029070 Chitinase insertion domain superfamily	0.0	CE32592	cht-3	Chitinase-like protein C25A8.4	1e-53	Q18143	Caenorhabditis elegans	Chitinase-like protein C25A8.4	2e-52	-0.263829	1	3.1476	0.0430755	3.17183	3.53992		4.9727	0.266188	18.8929	4.98562	21.9556	23.3398		5.9508	49.4547	15.8358	8.77685	19.0304	20.3474
Mg14510	1081		NXFT01000333.1.8793_g	IPR003689 Zinc/iron permease	0.0	Minc3s01652g25359	IPR003689 Zinc/iron permease	0.0	CE28225	zipt-2.2		3e-69	A4IIC5	Xenopus tropicalis	Zinc transporter ZIP3	1e-30	2.72157	0.0759826	3.12309	0.0292078	3.71962	3.32328		9.67922	35.771	61.7345	23.8634	52.6691	59.5527		23.0046	34.4248	23.9591	54.167	104	222.415
Mg6593	1480		NXFT01000548.1.1256_g	IPR000719 Protein kinase domain IPR008271 Serine/threonine-protein kinase 2C active site IPR011009 Protein kinase-like domain superfamily	0.0	Minc3s07843g41597	IPR000719 Protein kinase domain IPR011009 Protein kinase-like domain superfamily IPR017441 Protein kinase2C ATP binding site	6.36e-40									1.27195	0.372898	2.94685	0.0139777	5.91076	3.63621		4.9727	18.0186	9.57957	9.70506	4.38243	4.75273		37.2162	33.0585	9.74336	15.8691	3.80661	2.77634
Mg4786	1871		NXFT01000799.1.2041_g	IPR001752 Kinesin motor domain IPR019821 Kinesin motor domain 2C conserved site IPR027417 P-loop containing nucleoside triphosphate hydrolase IPR027640 Kinesin-like protein IPR036961 Kinesin motor domain superfamily	0.0	Minc3s00282g09333	IPR001180 Citron homology (CNH) domain IPR001752 Kinesin motor domain IPR001849 Pleckstrin homology domain IPR002219 Protein kinase C-like2C phorbol ester/diacylglycerol-binding domain IPR011993 PH-like domain superfamily IPR019821 Kinesin motor domain2C conserved site IPR027417 P-loop containing nucleoside triphosphate hydrolase IPR027640 Kinesin-like protein IPR036961 Kinesin motor domain super…	0.0	CE09600	bmk-1	Kinesin-like protein	2e-119	B2GU58	Xenopus tropicalis	Kinesin-like protein KIF11	9e-114	0.525942	0.994712	2.9271	0.00337174	1.05214	1.27719		2.61945	0.266188	20.7556	29.7627	65.0178	70.1281		4.52965	9.83061	11.0972	10.9045	32.13	33.7349
Mg27191	1294		NXFT01004042.1.10562_g	IPR000683 Oxidoreductase 2C N-terminal IPR036291 NAD(P)-binding domain superfamily	0.0	Minc3s10659g44252		2.54e-122					Q54U63	Dictyostelium discoideum	BEACH domain-containing protein lvsC	4e-59	2.8719	0.0513332	2.89234	0.0469676	1.67138	2.21599		23.7988	0.266188	20.7556	15.6044	13.0899	16.2896		14.4777	11.197	17.8666	8.77685	21.5087	28.2962
Mg24865	1220		NXFT01000089.1.1894_g		0.0	Minc3s02252g29084		0.0	CE31049			7e-33	P34542	Caenorhabditis elegans	Uncharacterized protein R05D3.9	1e-31	1.69289	0.259365	2.86818	0.00352984	1.88573	1.87898		4.9727	6.18366	17.9616	12.0648	31.4546	35.1971		17.32	7.09792	19.8975	17.2875	42.7512	24.1127
Mg32042	3070		NXFT01000790.1.1996_g	IPR001628 Zinc finger 2C nuclear hormone receptor-type IPR016355 Nuclear hormone receptor family 5	0.0	Minc3s00634g15400	IPR000536 Nuclear hormone receptor2C ligand-binding domain IPR001628 Zinc finger2C nuclear hormone receptor-type IPR013088 Zinc finger2C NHR/GATA-type IPR016355 Nuclear hormone receptor family 5 IPR035500 Nuclear hormone receptor-like domain superfamily	8.21e-149	CE03191	nhr-25	Nuclear hormone receptor family member nhr-25	8e-44	P49215	Solanum lycopersicum	SOLLC 40S ribosomal protein S17	1e-42	0.607646	0.975451	2.83613	0.0116506	0.909241	1.34941		0.266188	3.22492	22.6183	9.70506	66.7593	63.3983		5.9508	7.09792	10.4203	13.0322	34.6083	43.7755
Mg12885	1785		NXFT01000136.1.3471_g	IPR001680 WD40 repeat IPR015943 WD40/YVTN repeat-like-containing domain superfamily IPR017986 WD40-repeat-containing domain IPR019775 WD40 repeat 2C conserved site IPR024977 Anaphase-promoting complex subunit 4 2C WD40 domain IPR033010 The WD repeat Cdc20/Fizzy family IPR036322 WD40-repeat-containing domain superfamily	0.0	Minc3s01128g20994	IPR001680 WD40 repeat IPR015943 WD40/YVTN repeat-like-containing domain superfamily IPR017986 WD40-repeat-containing domain IPR019775 WD40 repeat2C conserved site IPR036322 WD40-repeat-containing domain superfamily	0.0	CE26338	fzy-1	WD repeat-containing protein fzy-1	2e-62	Q62623	Rattus norvegicus	Cell division cycle protein 20 homolog	6e-77	-5.68313	0.661733	2.51195	0.0269982	1.07596	1.13277		0.266188	0.266188	12.3736	10.8849	48.7112	44.1702		3.10849	7.09792	15.1589	9.48607	27.5274	26.2045
Mg10784	3001		NXFT01000950.1.1904_g	IPR003100 PAZ domain IPR003165 Piwi domain IPR012337 Ribonuclease H-like superfamily IPR036085 PAZ domain superfamily IPR036397 Ribonuclease H superfamily	0.0	Minc3s02350g29605	IPR003100 PAZ domain IPR003165 Piwi domain IPR012337 Ribonuclease H-like superfamily IPR036085 PAZ domain superfamily IPR036397 Ribonuclease H superfamily	0.0	CE06244	wago-1	Argonaute protein wago-1	2e-53	Q21770	Caenorhabditis elegans	Germ cell-expressed protein R06C7.1	3e-52	0.984515	0.528232	2.46671	0.0476727	19.9388	17.9347		54.3911	18.0186	57.0778	25.0432	197.687	183.894		72.745	134.168	64.5756	22.2521	79.5716	83.5197
Mg14027	1227		NXFT01003492.1.9106_g	IPR002076 ELO family IPR030457 ELO family 2C conserved site	0.0	Minc3s09183g42997	IPR002076 ELO family IPR030457 ELO family2C conserved site	0.0	CE19785	elo-2	Elongation of very long chain fatty acids protein	6e-109	Q8SWD4	Encephalitozoon cuniculi	ENCCU Ubiquitin	3e-41	1.8355	0.180147	2.44846	0.0371536	3.8387	3.78064		23.7988	0.266188	85.9493	84.0362	61.5349	48.0158		11.6354	27.5931	40.8826	42.8195	61.5155	59.2548
Mg3966	1745		NXFT01000717.1.1710_g	IPR012674 Calycin	0.0	Minc3s00163g06480	IPR012674 Calycin	0.0	CE03786	lpr-5		1e-72					-6.55262	0.462673	2.42329	0.00234546	1.64756	1.97527		0.266188	0.266188	2.12886	2.62591	345.714	340.603		8.7931	8.46427	5.68171	4.52152	53.3725	100.672
Mg14611	1891		NXFT01000527.1.1215_g	IPR000873 AMP-dependent synthetase/ligase	0.0												1.84976	0.00217759	2.3805	0.000216793	11.7459	20.8233		56.7444	59.4409	12.3736	15.6044	13.2482	15.0077		77.0084	90.4451	32.7593	47.0748	23.987	23.2759
Mg10418	991		NXFT01001318.1.3407_g	IPR002172 Low-density lipoprotein (LDL) receptor class A repeat IPR023415 Low-density lipoprotein (LDL) receptor class A 2C conserved site IPR036055 LDL receptor-like superfamily	0.0	Minc3s00713g16425	IPR002172 Low-density lipoprotein (LDL) receptor class A repeat IPR023415 Low-density lipoprotein (LDL) receptor class A2C conserved site IPR036055 LDL receptor-like superfamily	1.63e-52	CE22368	rme-2		9e-16					0.855595	0.498028	2.334	0.00583766	10.5788	7.84874		4.9727	29.8535	22.6183	26.2231	131.511	132.619		38.6373	52.1874	38.8518	25.0889	66.118	109.04
Mg12533	1600		NXFT01001468.1.3808_g	IPR002781 Transmembrane protein TauE-like	0.0	Minc3s01180g21458	IPR002781 Transmembrane protein TauE-like	0.0	CE08172			2e-118					1.33931	0.320096	2.31191	0.0381545	3.9816	2.67335		9.67922	6.18366	9.57957	8.5252	14.3564	15.0077		11.6354	19.395	9.74336	4.52152	21.1547	28.2962
Mg26735	973		NXFT01003497.1.9130_g	IPR002083 MATH/TRAF domain	0.0	Minc3s03241g33265		1.83e-72									1.22639	0.216815	2.26111	0.00729001	5.07718	4.45464		9.67922	12.1011	2.12886	2.62591	35.8875	29.7492		24.4258	19.395	15.1589	10.9045	20.0925	23.6943
Mg6691	1171		NXFT01004217.1.10962_g	IPR033438 Modulator of levamisole receptor-1	0.0	Minc3s00088g04182	IPR033438 Modulator of levamisole receptor-1	1.23e-106	CE47557			6e-18					1.69843	0.0162485	2.26084	0.000161043	5.64878	4.43057		21.4455	9.14239	294.569	212.641	189.138	185.817		18.7412	27.5931	144.455	179.699	341.917	327.005
Mg6763	2534		NXFT01002921.1.7656_g	IPR001962 Asparagine synthase IPR006426 Asparagine synthase 2C glutamine-hydrolyzing IPR014729 Rossmann-like alpha/beta/alpha sandwich fold IPR017932 Glutamine amidotransferase type 2 domain IPR029055 Nucleophile aminohydrolases 2C N-terminal	0.0	Minc3s00160g06396	IPR001962 Asparagine synthase IPR006426 Asparagine synthase2C glutamine-hydrolyzing IPR014729 Rossmann-like alpha/beta/alpha sandwich fold IPR017932 Glutamine amidotransferase type 2 domain IPR029055 Nucleophile aminohydrolases2C N-terminal IPR033738 Asparagine synthase2C N-terminal domain	0.0	CE04760	asns-2	Asparagine synthetase	4e-170	Q8WYB5	Homo sapiens	Histone acetyltransferase KAT6B	4e-118	1.42866	0.0123568	2.21148	0.000197191	19.1291	11.1706		28.5053	53.5234	46.8331	39.2015	93.9898	90.638		71.3238	67.2172	75.4066	66.2238	70.3665	66.3669
Mg12303	504		NXFT01001537.1.3989_g		1.17e-134	Minc3s00856g18142		8.00e-27									1.13792	0.320028	2.18942	0.019765	8.03045	5.22493		21.4455	6.18366	26.3436	17.9641	28.6049	35.1971		17.32	41.2566	17.8666	27.9258	20.0925	27.8779
Mg13046	5091		NXFT01001905.1.4902_g		0.0	Minc3s00301g09724		0.0	CE07281	rod-1	Kinetochore-associated protein rod-1	2e-61					0.622786	0.752175	2.08643	0.00160715	3.71962	5.29715		7.32596	6.18366	48.6958	35.662	121.854	94.8041		14.4777	22.1277	25.9899	19.4152	54.7887	51.306
Mg1811	2088		NXFT01003919.1.10229_g	IPR001310 Histidine triad (HIT) protein IPR011146 HIT-like domain IPR019808 Histidine triad 2C conserved site IPR036265 HIT-like superfamily IPR036526 Carbon-nitrogen hydrolase superfamily IPR039383 FHIT family	0.0	Minc3s00931g18998	IPR001310 Histidine triad (HIT) protein IPR003010 Carbon-nitrogen hydrolase IPR011146 HIT-like domain IPR019808 Histidine triad2C conserved site IPR036265 HIT-like superfamily IPR036526 Carbon-nitrogen hydrolase superfamily IPR039383 FHIT family	1.21e-156	CE22580	nft-1	Nitrilase homolog	2e-120	Q6P4H8	Homo sapiens	Protein FAM173B	2e-119	1.60145	0.000294469	2.07218	2.52717e-05	60.8084	51.6109		162.641	177.79	50.5584	73.4175	21.3223	19.4942		266.022	205.218	76.0835	67.6422	34.6083	27.0412
Mg9014	2796		NXFT01001809.1.4670_g	IPR023398 Translation Initiation factor eIF- 4e-like	0.0	Minc3s00027g01706	IPR015876 Acyl-CoA desaturase	4.83e-142	CE09320	fat-7	Delta(9)-fatty-acid desaturase fat-7	6e-87	Q95MI7	Capra hircus	CAPHI Acyl-CoA desaturase	2e-65	0.178964	0.989827	2.03666	0.00242376	11.7935	9.3171		16.739	6.18366	63.5972	48.6404	160.325	118.198		25.8469	59.0191	53.7445	44.9471	256.593	215.721
Mg1238	3087		NXFT01003131.1.8155_g	IPR007698 Alanine dehydrogenase/pyridine nucleotide transhydrogenase 2C NAD(H)-binding domain IPR007886 Alanine dehydrogenase/pyridine nucleotide transhydrogenase 2C N-terminal IPR024605 NAD(P) transhydrogenase 2C alpha subunit 2C C-terminal IPR026255 NAD(P) transhydrogenase 2C alpha subunit IPR029035 DHS-like NAD/FAD-binding domain superfamily IPR034300 NADP transhydrogenase beta-like domain IPR…	0.0	Minc3s05802g38851	IPR007698 Alanine dehydrogenase/pyridine nucleotide transhydrogenase2C NAD(H)-binding domain IPR007886 Alanine dehydrogenase/pyridine nucleotide transhydrogenase2C N-terminal IPR024605 NAD(P) transhydrogenase2C alpha subunit2C C-terminal IPR026255 NAD(P) transhydrogenase2C alpha subunit IPR029035 DHS-like NAD/FAD-binding domain superfamily IPR034300 NADP transhydrogenase beta-like domain IPR03629…	0.0	CE08176	nnt-1		0.0	Q13423	Homo sapiens	NAD(P) transhydrogenase, mitochondrial	0.0	-1.93717	0.000144302	-2.03652	7.13096e-05	158.052	168.695		33.2118	53.5234	33.7944	41.5613	81.9577	67.2439		42.9008	37.1575	50.3598	48.4933	45.9376	51.7244
Mg6608	5075		NXFT01002032.1.5243_g		0.0	Minc3s00638g15453		0.0	CE00409	ced-11	Protein ced-11	1e-95	P34641	Caenorhabditis elegans	Protein ced-11	2e-94	-0.990343	0.343769	-2.04923	0.0393	26.155	26.2154		14.3857	12.1011	11.4422	7.34534	16.4145	18.2124		4.52965	8.46427	14.4819	11.6137	13.3657	21.6025
Mg7409	1043		NXFT01001175.1.3011_g	IPR000990 Innexin IPR002083 MATH/TRAF domain IPR008974 TRAF-like	0.0	Minc3s01828g26582	IPR000990 Innexin	4.63e-166	CE24831	inx-6	Innexin-6	2e-104	Q9U3N4	Caenorhabditis elegans	Innexin-6	3e-103	-0.767221	0.537278	-2.05907	0.0429814	36.6582	39.4066		23.7988	20.9773	23.5496	7.34534	8.97362	10.5211		8.7931	9.83061	19.2205	9.48607	11.2415	11.9802
Mg6529	2695		NXFT01004184.1.10873_g		0.0	Minc3s00039g02271		1.93e-50									-1.13608	0.17272	-2.10761	0.015086	53.8777	66.7519		30.8585	23.9361	35.657	17.9641	12.2983	19.4942		13.0566	15.296	19.8975	44.9471	21.8628	37.0818
Mg1052	2182		NXFT01001366.1.3477_g	IPR001661 Glycoside hydrolase 2C family 37 IPR008928 Six-hairpin glycosidase superfamily IPR012341 Six-hairpin glycosidase-like superfamily IPR018232 Glycoside hydrolase 2C family 37 2C conserved site	0.0	Minc3s02399g29855	IPR001661 Glycoside hydrolase2C family 37 IPR008928 Six-hairpin glycosidase superfamily IPR012341 Six-hairpin glycosidase-like superfamily IPR018232 Glycoside hydrolase2C family 372C conserved site	0.0	CE35484	tre-4	Trehalase	6e-148	Q8MMG9	Pimpla hypochondriaca	PIMHY Trehalase	3e-93	-1.95575	0.0217356	-2.12495	0.0113045	65.1907	56.2808		19.0923	12.1011	45.9017	32.1224	31.6129	23.0194		5.9508	22.1277	24.6361	35.7273	32.484	45.8673
Mg3612	2111		NXFT01001056.1.2747_g	IPR002018 Carboxylesterase 2C type B IPR019819 Carboxylesterase type B 2C conserved site IPR019826 Carboxylesterase type B 2C active site IPR029058 Alpha/Beta hydrolase fold	0.0	Minc3s00638g15461	IPR002018 Carboxylesterase2C type B IPR019826 Carboxylesterase type B2C active site IPR029058 Alpha/Beta hydrolase fold	0.0	CE46616			8e-42	P37967	Bacillus subtilis	BACSU Para-nitrobenzyl esterase	1e-53	-1.58402	0.0924001	-2.13203	0.0256318	57.9504	45.93		14.3857	20.9773	35.657	55.7196	4.69906	5.0732		5.9508	18.0287	13.805	23.6705	5.93086	12.3986
Mg5536	2044		NXFT01001545.1.4026_g	IPR018482 Zinc finger 2C C4H2-type	0.0	Minc3s00014g00919	IPR001269 tRNA-dihydrouridine synthase IPR013785 Aldolase-type TIM barrel IPR014720 Double-stranded RNA-binding domain IPR018482 Zinc finger2C C4H2-type IPR018517 tRNA-dihydrouridine synthase2C conserved site IPR035587 DUS-like2C FMN-binding domain	2.19e-160									-0.814839	0.410791	-2.20216	0.0164372	26.417	19.1624		19.0923	6.18366	15.1676	9.70506	67.5509	66.6029		5.9508	4.36523	9.74336	11.6137	24.341	23.6943
Mg3439	2975		NXFT01000096.1.2531_g	IPR001577 Peptidase M8 2C leishmanolysin	0.0	Minc3s00965g19380	IPR001577 Peptidase M82C leishmanolysin	0.0	CE16622		Leishmanolysin-like peptidase	0.0	O62446	Caenorhabditis elegans	Leishmanolysin-like peptidase	0.0	-1.21197	0.168539	-2.24096	0.0149296	27.4173	32.3536		19.0923	6.18366	9.57957	13.2446	33.5128	35.5176		4.52965	8.46427	19.8975	17.2875	23.987	25.7861
Mg1339	885					Minc3s00496g13309	IPR011009 Protein kinase-like domain superfamily IPR026712 Choline/Ethanolamine kinase	1.21e-123	CE38493	cka-2	Choline kinase A2	8e-73	Q9Y259	Homo sapiens	Choline/ethanolamine kinase	6e-29	-0.802739	0.47677	-2.26792	0.0207247	43.4698	37.9623		9.67922	38.7297	18.8929	10.8849	17.3644	11.4825		11.6354	5.73157	35.4671	27.9258	44.1674	37.0818
Mg3751	865		NXFT01002047.1.5339_g	IPR034750 CULT domain	0.0	Minc3s00122g05260	IPR004910 Yippee/Mis18/Cereblon IPR034750 CULT domain	1.06e-62	CE20025		Protein yippee-like	5e-20					0.072196	1	-2.32788	0.0168639	24.3211	18.4162		23.7988	20.9773	27.275	16.7842	28.7632	20.1352		5.9508	2.99888	19.2205	14.4506	25.4032	19.0923
Mg3449	1643		NXFT01000043.1.11227_g	IPR008183 Aldose 1-/Glucose-6-phosphate 1-epimerase IPR011013 Galactose mutarotase-like domain superfamily IPR014718 Glycoside hydrolase-type carbohydrate-binding	0.0	Minc3s00019g01246	IPR008183 Aldose 1-/Glucose-6-phosphate 1-epimerase IPR011013 Galactose mutarotase-like domain superfamily IPR014718 Glycoside hydrolase-type carbohydrate-binding IPR015443 Aldose 1-epimerase	0.0	CE20475		Aldose 1-epimerase	5e-47	Q5EA79	Bos taurus	Aldose 1-epimerase	2e-65	-2.05419	0.0582587	-2.43184	0.0269366	81.5528	76.7897		7.32596	32.8123	20.7556	19.1439	27.3384	15.3282		13.0566	16.6623	28.0208	52.7486	11.9496	29.5513
Mg3461	2322		NXFT01004282.1.11125_g	IPR000719 Protein kinase domain IPR001090 Ephrin receptor ligand binding domain IPR001245 Serine-threonine/tyrosine-protein kinase 2C catalytic domain IPR008979 Galactose-binding-like domain superfamily IPR011009 Protein kinase-like domain superfamily IPR017441 Protein kinase 2C ATP binding site IPR027936 Ephrin receptor 2C transmembrane domain	0.0	Minc3s00928g18968	IPR000719 Protein kinase domain IPR001090 Ephrin receptor ligand binding domain IPR001245 Serine-threonine/tyrosine-protein kinase2C catalytic domain IPR008266 Tyrosine-protein kinase2C active site IPR008979 Galactose-binding-like domain superfamily IPR011009 Protein kinase-like domain superfamily IPR017441 Protein kinase2C ATP binding site IPR020635 Tyrosine-protein kinase2C catalytic domain IPR…	0.0	CE25060	vab-1	Ephrin receptor 1	1e-100	O13147	Danio rerio	Ephrin type-B receptor 3 (Fragment)	4e-99	-2.29776	0.0506488	-2.44496	0.0344877	40.9214	35.17		12.0325	3.22492	9.57957	4.98562	22.2722	15.0077		3.10849	11.197	9.06642	13.0322	15.49	17.8373
Mg848	1268		NXFT01000836.1.2110_g	IPR000742 EGF-like domain	0.0	Minc3s05564g38440	IPR000152 EGF-type aspartate/asparagine hydroxylation site IPR000742 EGF-like domain IPR001881 EGF-like calcium-binding domain IPR018097 EGF-like calcium-binding2C conserved site	0.0	CE29511	mup-4	Transmembrane matrix receptor MUP-4	6e-31	Q9NYB9	Homo sapiens	Abl interactor 2	3e-27	-1.88677	0.0911227	-2.5643	0.0247412	36.5153	30.1149		14.3857	3.22492	32.863	17.9641	21.0057	10.8416		5.9508	5.73157	10.4203	17.9967	20.8006	14.072
Mg2209	1757		NXFT01002314.1.6153_g	IPR000242 PTP type protein phosphatase IPR029021 Protein-tyrosine phosphatase-like	0.0	Minc3s00349g10758	IPR000242 PTP type protein phosphatase IPR000387 Tyrosine specific protein phosphatases domain IPR003595 Protein-tyrosine phosphatase2C catalytic IPR004827 Basic-leucine zipper domain IPR016130 Protein-tyrosine phosphatase2C active site IPR029021 Protein-tyrosine phosphatase-like	0.0	CE45889		Tyrosine-protein phosphatase	0.0	Q95017	Caenorhabditis elegans	SUMO-conjugating enzyme UBC9	9e-56	-1.58591	0.0730465	-2.65869	0.00530913	38.6112	58.8083		9.67922	23.9361	20.7556	8.5252	14.5147	13.7258		7.37195	8.46427	28.6977	23.6705	24.341	19.9291
Mg6061	2158		NXFT01000681.1.1623_g	IPR001841 Zinc finger 2C RING-type IPR002867 IBR domain IPR013083 Zinc finger 2C RING/FYVE/PHD-type IPR031127 E3 ubiquitin ligase RBR family	0.0	Minc3s00584g14654	IPR001841 Zinc finger2C RING-type IPR002867 IBR domain IPR013083 Zinc finger2C RING/FYVE/PHD-type IPR031127 E3 ubiquitin ligase RBR family	6.51e-143	CE29680	ari-1.1	RBR-type E3 ubiquitin transferase	1e-74	Q94981	Drosophila melanogaster	Protein ariadne-1	5e-69	0.00228709	1	-3.42764	0.0401171	14.1752	16.5386		23.7988	6.18366	18.8929	10.8849	14.0398	10.8416		0.266188	2.99888	12.4511	13.0322	15.49	16.1638
Mg2510	588		NXFT01002763.1.7251_g		6.28e-143	Minc3s00037g02167		6.48e-18									-1.06753	0.345934	-3.5245	0.00489526	30.2515	34.5682		21.4455	9.14239	15.1676	14.4245	7.07382	11.4825		1.68734	4.36523	9.06642	14.4506	13.0117	20.3474
Mg4407	1588		NXFT01000167.1.4355_g	IPR001134 Netrin domain IPR001820 Protease inhibitor I35 (TIMP) IPR008993 Tissue inhibitor of metalloproteinases-like 2C OB-fold	6.25e-142	Minc3s00201g07449	IPR001134 Netrin domain IPR001820 Protease inhibitor I35 (TIMP) IPR008993 Tissue inhibitor of metalloproteinases-like2C OB-fold	3.93e-72	CE07348	cri-2	Putative metalloproteinase inhibitor tag-225	2e-15	Q7TQ20	Rattus norvegicus	DnaJ homolog subfamily C member 2	3e-14	-2.14442	0.129334	-3.62911	0.0198329	36.6106	32.7628		9.67922	6.18366	2.12886	4.98562	7.07382	5.39367		0.266188	5.73157	15.8358	15.1598	11.2415	7.37829
Mg12807	356		NXFT01002723.1.7113_g		1.69e-156	Minc3s00001g00024		8.36e-56	CE16205			6e-21					-1.45302	0.176156	-3.67321	0.00485668	17.8668	18.5124		7.32596	6.18366	10.5109	15.6044	59.4767	66.2825		0.266188	2.99888	18.5436	10.1953	44.1674	31.2248
Mg10689	241		NXFT01002438.1.6463_g		5.74e-80												-2.92632	0.104063	-5.37839	0.0159426	49.6383	10.3763		4.9727	3.22492	0.266188	0.266188	5.49065	2.82993		1.68734	0.266188	10.4203	8.77685	17.2602	12.3986
Mg336	1131					Minc3s04142g35592	IPR002918 Lipase EstA/Esterase EstB IPR029058 Alpha/Beta hydrolase fold	4.72e-64	CE12168	fil-2		2e-78					-1.66788	0.344185	-5.90717	0.00955989	71.2163	14.6369		9.67922	18.0186	3.99154	3.80577	0.582822	0.907123		0.266188	1.63253	1.62007	3.10307	0.266188	0.684547
Mg16482	2532		NXFT01003388.1.8900_g	IPR001507 Zona pellucida domain	0.0	Minc3s01479g24143	IPR001507 Zona pellucida domain	0.0	CE32057	cutl-16		1e-61	Q03755	Caenorhabditis elegans	Cuticlin-1	8e-33	-7.96992	0.112861	-7.96992	0.0215097	4.36267	4.47871		0.266188	0.266188	0.266188	0.266188	100.481	87.7538		0.266188	0.266188	4.32783	3.10307	23.987	15.3271
Mg9538	670		NXFT01002975.1.7829_g	IPR000571 Zinc finger 2C CCCH-type IPR036855 Zinc finger 2C CCCH-type superfamily	0.0	Minc3s00307g09844	IPR000571 Zinc finger2C CCCH-type IPR036855 Zinc finger2C CCCH-type superfamily	3.18e-42									0.239152	1	-8.07339	0.0380269	4.88664	4.575		4.9727	6.18366	9.57957	14.4245	17.2061	17.5714		0.266188	0.266188	7.0356	10.1953	11.5955	18.674
Mg12756	1118		NXFT01001833.1.4750_g	IPR000668 Peptidase C1A 2C papain C-terminal IPR013128 Peptidase C1A IPR025660 Cysteine peptidase 2C histidine active site IPR038765 Papain-like cysteine peptidase superfamily	0.0	Minc3s00767g17082	IPR000668 Peptidase C1A2C papain C-terminal IPR025660 Cysteine peptidase2C histidine active site IPR038765 Papain-like cysteine peptidase superfamily	4.08e-126	CE14680			3e-29	P25792	Schistosoma mansoni	SCHMA Cathepsin B-like cysteine proteinase	2e-28	-8.31373	0.0628192	-8.31373	0.0128181	6.05366	5.03236		0.266188	0.266188	130.653	71.0577	189.93	115.955		0.266188	0.266188	62.5447	76.1529	90.9009	99.4173
Mg14895	2754		NXFT01001400.1.3601_g	IPR000152 EGF-type aspartate/asparagine hydroxylation site IPR000742 EGF-like domain IPR001881 EGF-like calcium-binding domain IPR003886 NIDO domain IPR009030 Growth factor receptor cysteine-rich domain superfamily IPR013032 EGF-like 2C conserved site IPR018097 EGF-like calcium-binding 2C conserved site	0.0	Minc3s01520g24451	IPR000152 EGF-type aspartate/asparagine hydroxylation site IPR000742 EGF-like domain IPR001881 EGF-like calcium-binding domain IPR003886 NIDO domain IPR009030 Growth factor receptor cysteine-rich domain superfamily IPR013032 EGF-like2C conserved site IPR018097 EGF-like calcium-binding2C conserved site	0.0	CE44889	dex-1	Dendrite extension defective protein 1	0.0	Q12324	Saccharomyces cerevisiae	Calcium channel YVC1	0.0	0.492256	0.804257	-8.41358	0.0141583	4.81519	7.0303		4.9727	12.1011	7.71689	7.34534	164.441	150.886		0.266188	0.266188	8.38948	3.10307	41.6891	27.8779
Mg5924	724		NXFT01002237.1.564_g	IPR001452 SH3 domain IPR002014 VHS domain IPR003903 Ubiquitin interacting motif IPR008942 ENTH/VHS IPR036028 SH3-like domain superfamily	7.89e-133	Minc3s00008g00526	IPR001452 SH3 domain IPR002014 VHS domain IPR003903 Ubiquitin interacting motif IPR008942 ENTH/VHS IPR036028 SH3-like domain superfamily	2.17e-109	CE32816	stam-1	Signal transducing adapter molecule 1	4e-34	O01498	Caenorhabditis elegans	Signal transducing adapter molecule 1	9e-33	0.530847	0.868451	-8.83761	0.0370852	7.00633	8.71531		4.9727	18.0186	8.64823	6.16548	7.39045	12.4439		0.266188	0.266188	7.0356	4.52152	11.9496	9.47009
Mg7455	1281		NXFT01003955.1.926_g	IPR002486 Nematode cuticle collagen 2C N-terminal IPR008160 Collagen triple helix repeat	0.0	Minc3s01822g26528	IPR002486 Nematode cuticle collagen2C N-terminal IPR008160 Collagen triple helix repeat	1.80e-111	CE08889	col-68		3e-17	P34804	Caenorhabditis elegans	Cuticle collagen 40	3e-15	-0.0305155	1	-8.9559	0.0114585	9.19748	7.82466		2.61945	15.0599	6.78555	4.98562	116.629	122.685		0.266188	0.266188	5.68171	1.68463	27.8815	19.9291
Mg6163	1373		NXFT01001842.1.4794_g	IPR019144 Membralin	0.0	Minc3s00218g07836		7.37e-96									0.838569	0.722768	-9.00149	0.0323081	9.10221	8.45053		21.4455	9.14239	6.78555	4.98562	13.0899	10.8416		0.266188	0.266188	3.65089	11.6137	5.93086	13.6537
Mg4400	2082		NXFT01001776.1.4571_g	IPR003280 Two pore domain potassium channel IPR013099 Potassium channel domain	0.0	Minc3s06303g39643	IPR003280 Two pore domain potassium channel IPR013099 Potassium channel domain	0.0	CE37366			1e-33	Q504N0	Mus musculus	Carboxypeptidase A2	4e-37	-1.04672	0.682533	-9.91229	0.015005	16.9617	15.5998		9.67922	6.18366	2.12886	7.34534	5.17401	4.1118		0.266188	0.266188	5.68171	10.1953	4.51469	5.2865
Mg9898	1745					Minc3s05517g38356	IPR000719 Protein kinase domain IPR008271 Serine/threonine-protein kinase2C active site IPR011009 Protein kinase-like domain superfamily IPR017441 Protein kinase2C ATP binding site	1.78e-43	CE40646	sad-1	Serine\/threonine kinase SAD-1	8e-43	Q21974	Caenorhabditis elegans	Degenerin unc-8	2e-48	-1.75546	0.505627	-11.3701	0.0300774	64.8811	23.6878		14.3857	12.1011	5.85422	2.62591	0.266188	0.907123		0.266188	0.266188	0.266188	8.06763	0.974272	1.10291
Mg4199	1490																-0.0681831	1	-11.7177	0.0222132	91.8655	20.703		70.8639	35.771	2.12886	9.70506	0.424505	0.266188		0.266188	0.266188	0.266188	1.68463	0.266188	0.266188

## Sheet: 2dpi vs J2 S
M. graminicola transcript	Length	SP & NLS prediction	Best blastn hit			Best blastx hit											LogFC (Nip2 versus J2)	FDR (Padj)	LogFC (Tog2 versus J2)	FDR (Padj)	normalised CPM value
			M. graminicola			M. incognita			C. elegans				Uniprot								pre-J2			in Nipponbare (S)							in TOG5681 (R )
			CDS	Fonction	e-value	Protein	Fonction	e-value	Protein	Class	Fonction	e-value	Protein	Species	Fonction	e-value					J2A	J2B		Nip2A	Nip2B	Nip4A	Nip4B	Nip8A	Nip8B		Tog2A	Tog2B	Tog4A	Tog4B	Tog8A	Tog8B
Mg77937	733					Minc3s03763g34731	IPR001141 Ribosomal protein L27e IPR008991 Translation protein SH3-like domain superfamily IPR038655 Ribosomal protein L27e superfamily IPR041991 Eukaryotic Ribosomal Protein L272C KOW domain	8.85e-40	CE19381	rpl-27	60S ribosomal protein L27	3e-27	Q02984	Pyrobotrys	PYRST 60S ribosomal protein L27	8e-46	12.2109	0.0483861	11.1097	0.0847477	0.266188	0.266188		92.0433	65.3583	23.5496	147.749	5.49065	89.3561		24.4258	49.4547	12.4511	61.2592	16.1981	47.1224
Mg78267	1943					Minc3s04772g36976	IPR001404 Heat shock protein Hsp90 family IPR003594 Histidine kinase/HSP90-like ATPase IPR019805 Heat shock protein Hsp902C conserved site IPR020568 Ribosomal protein S5 domain 2-type fold IPR020575 Heat shock protein Hsp902C N-terminal IPR036890 Histidine kinase/HSP90-like ATPase superfamily IPR037196 HSP902C C-terminal domain	0.0	CE05441	hsp-90	Heat shock protein 90	0.0	P36181	Solanum lycopersicum	SOLLC Heat shock cognate protein 80	0.0	11.8309	0.0393178	11.0514	0.0635165	0.266188	0.266188		73.2172	47.6059	49.6271	22.6835	13.4065	135.183		18.7412	52.1874	7.0356	37.1457	7.70107	47.1224
Mg59895	878																11.7494	0.0463854	10.2942	0.102692	0.266188	0.266188		99.103	12.1011	179.083	347.145	21.164	149.604		18.7412	23.4941	47.652	116.579	9.11724	80.1728
Mg78002	1048					Minc3s04174g35667	IPR002136 Ribosomal protein L4/L1e IPR013000 Ribosomal protein L4/L1e2C eukaryotic/archaeal2C conserved site IPR023574 Ribosomal protein L4 domain superfamily IPR025755 60S ribosomal protein L42C C-terminal domain	6.00e-83	CE07669	rpl-4	60S ribosomal protein L4	2e-61	Q9SF40	Arabidopsis thaliana	60S ribosomal protein L4-1	6e-93	11.6031	0.0249768	8.97604	0.0818314	0.266188	0.266188		73.2172	29.8535	11.4422	36.8418	2.79926	24.6217		8.7931	8.46427	1.62007	16.5783	2.74448	20.3474
Mg59031	656					Minc3s05325g38024	IPR000169 Cysteine peptidase2C cysteine active site IPR000668 Peptidase C1A2C papain C-terminal IPR013201 Cathepsin propeptide inhibitor domain (I29) IPR025660 Cysteine peptidase2C histidine active site IPR025661 Cysteine peptidase2C asparagine active site IPR038765 Papain-like cysteine peptidase superfamily IPR039417 Papain-like cysteine endopeptidase	7.99e-18	CE47424	cpl-1		5e-21	Q8QLK1	Mamestra configurata	NPVMC Viral cathepsin	5e-24	11.2472	0.0226936	7.99764	0.0906062	0.266188	0.266188		80.277	0.266188	10.5109	0.266188	0.582822	0.586656		8.7931	0.266188	2.97395	0.266188	0.62023	0.684547
Mg68291	561					Minc3s00038g02234	IPR001147 Ribosomal protein L21e IPR008991 Translation protein SH3-like domain superfamily IPR018259 Ribosomal protein L21e2C conserved site IPR036948 Ribosomal protein L21 superfamily	6.59e-31	CE00078	rpl-21	60S ribosomal protein L21	2e-34	Q43291	Arabidopsis thaliana	60S ribosomal protein L21-1	2e-45	11.1929	0.0259605	8.57149	0.0840149	0.266188	0.266188		2.61945	77.1933	2.12886	22.6835	0.899456	5.0732		10.2143	2.99888	11.0972	5.23074	21.5087	3.61306
Mg60041	315																11.16	0.0255877	7.4131	0.124932	0.266188	0.266188		75.5705	0.266188	12.3736	0.266188	0.266188	0.266188		5.9508	0.266188	3.65089	0.97541	0.974272	0.684547
Mg61031	593																11.1599	0.023029	6.98935	0.144562	0.266188	0.266188		75.5705	0.266188	15.1676	1.44605	0.266188	0.266188		3.10849	1.63253	2.97395	0.266188	0.266188	0.266188
Mg60354	450												P36400	Leishmania mexicana	LEIME Cysteine proteinase B	1e-14	11.0781	0.0365806	8.58356	0.0968787	0.266188	0.266188		68.5107	3.22492	4.92288	0.266188	0.266188	0.266188		13.0566	0.266188	6.35865	0.266188	0.974272	0.266188
Mg60188	294																10.857	0.0296237	6.4202	0.185604	0.266188	0.266188		61.4509	0.266188	3.99154	0.266188	0.266188	0.266188		3.10849	0.266188	1.62007	0.266188	0.974272	0.266188
Mg66635	587					Minc3s01874g26893	IPR007204 Actin-related protein 2/3 complex subunit 3 IPR036753 Actin-related protein 2/3 complex subunit 3 superfamily	7.93e-47	CE20206	arx-5	Probable actin-related protein 2\/3 complex subunit 3	4e-38	P19109	Drosophila melanogaster	ATP-dependent RNA helicase p62	8e-59	10.8428	0.04917	7.73265	0.170015	0.266188	0.266188		0.266188	62.3996	3.99154	9.70506	0.741139	6.996		7.37195	0.266188	5.68171	0.266188	18.3223	6.12322
Mg61197	485																10.8046	0.0483963	7.0003	0.198207	0.266188	0.266188		59.0976	0.266188	9.57957	0.266188	0.424505	0.266188		4.52965	0.266188	9.06642	0.266188	0.266188	0.266188
Mg61943	407																10.804	0.0458159	7.41478	0.160909	0.266188	0.266188		59.0976	0.266188	5.85422	0.266188	0.266188	0.266188		5.9508	0.266188	9.06642	0.266188	0.62023	0.266188
Mg63862	534					Minc3s00535g13895	IPR006068 Cation-transporting P-type ATPase2C C-terminal IPR022141 Plasma membrane calcium transporting P-type ATPase2C C-terminal IPR023298 P-type ATPase2C transmembrane domain superfamily IPR036412 HAD-like superfamily	1.39e-28	CE28747	mca-2	Calcium-transporting ATPase	3e-26	Q9HDW7	Schizosaccharomyces pombe	Calcium-transporting ATPase 2	6e-29	10.7443	0.0490457	6.41914	0.243723	0.266188	0.266188		56.7444	0.266188	12.3736	0.266188	0.266188	0.266188		3.10849	0.266188	2.97395	0.266188	0.266188	0.266188
Mg59147	315																10.6806	0.0366147	7.4069	0.128053	0.266188	0.266188		54.3911	0.266188	0.266188	0.266188	0.266188	0.266188		4.52965	1.63253	2.97395	0.266188	1.32831	0.266188
Mg67394	412	SP				Minc3s00032g01931	IPR005788 Disulphide isomerase IPR005792 Protein disulphide isomerase IPR013766 Thioredoxin domain IPR017937 Thioredoxin2C conserved site IPR036249 Thioredoxin-like superfamily	8.55e-23	CE11570	pdi-3	Protein disulfide-isomerase	6e-24	Q5R5B6	Pongo abelii	Protein disulfide-isomerase	2e-23	10.6247	0.00767027	5.4147	0.291726	0.266188	0.266188		0.266188	53.5234	3.99154	14.4245	0.582822	4.75273		0.266188	1.63253	1.62007	1.68463	9.47128	1.93962
Mg62145	412																10.6177	0.0433598	-5.12548e-15	1	0.266188	0.266188		52.0379	0.266188	8.64823	0.266188	0.424505	0.266188		0.266188	0.266188	4.32783	0.266188	0.266188	0.266188
Mg66688	2347					Minc3s00023g01448	IPR013126 Heat shock protein 70 family IPR029047 Heat shock protein 70kD2C peptide-binding domain superfamily IPR029048 Heat shock protein 70kD2C C-terminal domain superfamily	0.0	CE09682	hsp-1	Heat shock 70 kDa protein A	0.0	P63018	Rattus norvegicus	Heat shock cognate 71 kDa protein	0.0	10.6159	0.0415758	10.2843	0.0510257	0.266188	0.266188		28.5053	23.9361	30.069	296.411	23.5388	83.2672		5.9508	35.7912	7.0356	8.77685	23.2789	39.1736
Mg67660	562					Minc3s00897g18645	IPR000530 Ribosomal protein S12e IPR004038 Ribosomal protein L7Ae/L30e/S12e/Gadd45 IPR029064 50S ribosomal protein L30e-like	1.44e-30	CE26896	rps-12	40S ribosomal protein S12	1e-31	Q9XHS0	Hordeum vulgare	HORVU 40S ribosomal protein S12	1e-37	10.6125	0.0325141	8.72508	0.079375	0.266188	0.266188		0.266188	53.5234	3.0602	25.0432	0.899456	5.39367		11.6354	2.99888	4.32783	4.52152	22.9249	2.77634
Mg59826	231																10.5505	0.0411061	5.43284	0.338257	0.266188	0.266188		49.6846	0.266188	10.5109	0.266188	0.266188	0.266188		1.68734	0.266188	0.943129	0.266188	0.266188	0.266188
Mg64406	470	SP															10.509	0.0406537	7.41299	0.15198	0.266188	0.266188		4.9727	44.6472	0.266188	14.4245	0.266188	4.75273		5.9508	0.266188	1.62007	3.8123	12.3036	2.77634
Mg60603	160																10.4061	0.04917	6.42158	0.21097	0.266188	0.266188		44.9781	0.266188	5.85422	0.266188	0.266188	0.266188		3.10849	0.266188	2.29701	0.266188	0.266188	0.684547
Mg63109	227																10.4061	0.0422198	7.73891	0.117548	0.266188	0.266188		44.9781	0.266188	1.19753	0.266188	0.266188	0.266188		7.37195	0.266188	2.29701	1.68463	0.266188	0.266188
Mg74971	493					Minc3s00908g18766	IPR000608 Ubiquitin-conjugating enzyme E2 IPR016135 Ubiquitin-conjugating enzyme/RWD-like IPR023313 Ubiquitin-conjugating enzyme2C active site	7.24e-37	CE03482	let-70	Ubiquitin-conjugating enzyme E2 2	2e-34	Q94490	Dictyostelium discoideum	Ubiquitin conjugating enzyme E2 B	2e-36	10.3646	0.0489912	6.41943	0.238458	0.266188	0.266188		0.266188	44.6472	0.266188	2.62591	0.582822	2.18899		3.10849	0.266188	2.97395	0.266188	13.7198	0.266188
Mg59973	2072					Minc3s00083g03983	IPR002082 Aspartate carbamoyltransferase IPR002195 Dihydroorotase2C conserved site IPR002474 Carbamoyl-phosphate synthase small subunit2C N-terminal domain IPR005479 Carbamoyl-phosphate synthetase large subunit-like2C ATP-binding domain IPR005480 Carbamoyl-phosphate synthetase2C large subunit oligomerisation domain IPR005483 Carbamoyl-phosphate synthase large subunit2C CPSase domain IPR006130 Asp…	0.0	CE41886	pyr-1	Glutamine-dependent carbamoyl-phosphate synthase	0.0	O93937	Emericella nidulans	EMENI Protein pyrABCN	0.0	10.355	0.0406515	8.85165	0.116811	0.266188	0.266188		30.8585	12.1011	98.988	117.072	9.44857	49.2977		8.7931	7.09792	9.74336	53.4578	3.80661	27.4595
Mg60534	603					Minc3s00528g13773	IPR001680 WD40 repeat IPR015048 Domain of unknown function DUF1899 IPR015505 Coronin IPR015943 WD40/YVTN repeat-like-containing domain superfamily IPR017986 WD40-repeat-containing domain IPR036322 WD40-repeat-containing domain superfamily	3.47e-43	CE30350	cor-1	Coronin-like protein cor-1	1e-43	P27133	Dictyostelium discoideum	Coronin-A	1e-72	10.337	0.0280673	-5.12548e-15	1	0.266188	0.266188		42.6248	0.266188	31.0003	0.266188	0.424505	0.586656		0.266188	0.266188	2.97395	0.97541	1.32831	0.266188
Mg62690	284																10.3322	0.0455279	7.00198	0.17149	0.266188	0.266188		42.6248	0.266188	12.3736	0.266188	0.582822	0.266188		4.52965	0.266188	3.65089	0.266188	2.39044	0.266188
Mg62135	585																10.331	0.0483042	6.39018	0.218278	0.266188	0.266188		42.6248	0.266188	1.19753	12.0648	3.90748	0.266188		0.266188	2.99888	0.266188	0.266188	0.266188	0.266188
Mg59945	360																10.3307	0.0423845	7.41668	0.133831	0.266188	0.266188		42.6248	0.266188	9.57957	1.44605	0.266188	0.266188		5.9508	0.266188	2.97395	0.266188	0.266188	0.266188
Mg62398	1048	SP				Minc3s01807g26448	IPR000169 Cysteine peptidase2C cysteine active site IPR000668 Peptidase C1A2C papain C-terminal IPR013201 Cathepsin propeptide inhibitor domain (I29) IPR025660 Cysteine peptidase2C histidine active site IPR025661 Cysteine peptidase2C asparagine active site IPR038765 Papain-like cysteine peptidase superfamily IPR039417 Papain-like cysteine endopeptidase	9.13e-54	CE35305	tag-196		2e-51	P04988	Dictyostelium discoideum	Cysteine proteinase 1	3e-67	10.2917	0.0344546	7.97672	0.203396	0.266188	0.266188		23.7988	18.0186	134.379	144.209	23.5388	96.4064		3.10849	5.73157	32.7593	89.6281	5.93086	43.7755
Mg62983	418																10.2685	0.0353872	-5.12548e-15	1	0.266188	0.266188		37.9183	3.22492	12.3736	0.266188	0.424505	0.266188		0.266188	0.266188	7.0356	0.266188	0.974272	0.266188
Mg62564	621					Minc3s01250g22088	IPR000235 Ribosomal protein S5/S7 IPR005716 Ribosomal protein S5/S72C eukaryotic/archaeal IPR020606 Ribosomal protein S72C conserved site IPR023798 Ribosomal protein S7 domain IPR036823 Ribosomal protein S7 domain superfamily	7.73e-95	CE06360	rps-5	40S ribosomal protein S5	3e-86	P46782	Homo sapiens	40S ribosomal protein S5	3e-91	10.242	0.0258122	9.18735	0.0528326	0.266188	0.266188		33.2118	6.18366	28.2063	104.094	11.3484	29.4287		3.10849	16.6623	19.2205	28.6351	3.09852	25.7861
Mg61855	243					Minc3s03281g33396	IPR000504 RNA recognition motif domain IPR002004 Polyadenylate-binding protein/Hyperplastic disc protein IPR006515 Polyadenylate binding protein2C human types 12C 22C 32C 4 IPR012677 Nucleotide-binding alpha-beta plait domain superfamily IPR035979 RNA-binding domain superfamily IPR036053 PABC (PABP) domain	1.65e-14	CE20412	pab-1	Polyadenylate-binding protein	1e-13	P21187	Drosophila melanogaster	Polyadenylate-binding protein	3e-15	10.222	0.0215754	8.22353	0.0563501	0.266188	0.266188		30.8585	9.14239	3.99154	2.62591	0.266188	0.266188		10.2143	0.266188	1.62007	0.97541	1.68236	0.266188
Mg49869	644																10.2126	0.0269456	9.19571	0.0520038	0.266188	0.266188		19.0923	20.9773	31.9317	66.3383	4.54075	32.9539		8.7931	11.197	13.1281	31.4719	0.974272	17.0006
Mg61879	312																10.158	0.0436252	5.43498	0.280861	0.266188	0.266188		37.9183	0.266188	3.0602	1.44605	0.582822	0.266188		1.68734	0.266188	0.943129	0.266188	0.62023	0.266188
Mg62264	589																10.1441	0.0478538	7.39041	0.305049	0.266188	0.266188		33.2118	3.22492	71.9792	65.1584	23.5388	47.0544		0.266188	5.73157	15.1589	38.5642	2.39044	37.5001
Mg58801	342																10.0688	0.0464775	7.41735	0.135143	0.266188	0.266188		35.5651	0.266188	8.64823	0.266188	0.266188	0.266188		5.9508	0.266188	2.29701	1.68463	0.266188	0.684547
Mg77357	501					Minc3s00020g01317	IPR013126 Heat shock protein 70 family IPR018181 Heat shock protein 702C conserved site	3.88e-90	CE09682	hsp-1	Heat shock 70 kDa protein A	4e-83	P41753	Achlya klebsiana	ACHKL Heat shock 70 kDa protein	3e-89	10.0357	0.0482836	8.37065	0.10346	0.266188	0.266188		0.266188	35.771	3.99154	17.9641	0.266188	1.54806		0.266188	11.197	0.943129	4.52152	0.266188	3.61306
Mg60746	239																9.97994	0.0421237	6.40149	0.463328	0.266188	0.266188		21.4455	12.1011	65.4598	73.4175	7.39045	39.3632		0.266188	2.99888	13.805	52.7486	4.16065	38.7552
Mg78303	247					Minc3s02939g32143	IPR027534 Ribosomal protein L12 family IPR038716 Ribosomal protein P1/P22C N-terminal domain	7.10e-13	CE26658	rla-1	60S acidic ribosomal protein P1	4e-16	P29763	Chlamydomonas reinhardtii	CHLRE 60S acidic ribosomal protein P1	9e-30	9.96863	0.016864	7.70826	0.0711603	0.266188	0.266188		21.4455	12.1011	3.99154	29.7627	1.05777	23.9808		1.68734	5.73157	0.943129	8.77685	4.16065	12.817
Mg77754	1047					Minc3s01409g23576	IPR001232 S-phase kinase-associated protein 1-like IPR011333 SKP1/BTB/POZ domain superfamily IPR016072 SKP1 component2C dimerisation IPR016073 SKP1 component2C POZ domain IPR016897 S-phase kinase-associated protein 1 IPR036296 SKP1-like2C dimerisation domain superfamily	3.19e-48	CE10580	skr-1	Skp1-related protein	3e-41	Q9FHW7	Arabidopsis thaliana	SKP1-like protein 1B	5e-56	9.92066	0.00538073	6.41434	0.128622	0.266188	0.266188		12.0325	20.9773	5.85422	13.2446	0.899456	29.4287		3.10849	0.266188	2.97395	6.64918	3.80661	13.6537
Mg77582	407																9.90896	0.0272987	7.38783	0.0967172	0.266188	0.266188		0.266188	32.8123	1.19753	28.5828	0.266188	1.54806		1.68734	4.36523	0.943129	5.93996	0.266188	0.684547
Mg78433	786																9.90107	0.00531221	6.98899	0.0541785	0.266188	0.266188		14.3857	18.0186	2.12886	20.3238	0.741139	14.3668		3.10849	1.63253	2.29701	5.23074	1.68236	13.2353
Mg78181	613					Minc3s00417g11967	IPR005755 Ribosomal protein L132C eukaryotic/archaeal IPR005822 Ribosomal protein L13 IPR036899 Ribosomal protein L13 superfamily	1.64e-68	CE01030	rpl-16	60S ribosomal protein L13a	7e-56	Q9LRX8	Arabidopsis thaliana	60S ribosomal protein L13a-2	3e-81	9.89933	0.0423845	9.10211	0.0702082	0.266188	0.266188		14.3857	18.0186	4.92288	38.0217	0.899456	20.1352		14.4777	4.36523	0.943129	15.1598	3.09852	9.47009
Mg66657	976					Minc3s00965g19376	IPR000876 Ribosomal protein S4e IPR002942 RNA-binding S4 domain IPR005824 KOW IPR013843 Ribosomal protein S4e2C N-terminal IPR013845 Ribosomal protein S4e2C central region IPR014722 Ribosomal protein L22C domain 2 IPR018199 Ribosomal protein S4e2C N-terminal2C conserved site IPR032277 40S ribosomal protein S42C C-terminal domain IPR038237 Ribosomal protein S4e2C central domain superfamily IPR0419…	3.24e-113	CE24278	rps-4	40S ribosomal protein S4	7e-88	Q5UAP0	Bombyx mori	BOMMO 40S ribosomal protein S4	2e-109	9.89498	0.0386271	9.28864	0.0545591	0.266188	0.266188		14.3857	18.0186	3.99154	40.3814	8.65699	54.1047		4.52965	16.6623	18.5436	48.4933	66.118	46.2857
Mg44305	627					Minc3s00131g05590	IPR000911 Ribosomal protein L11/L12 IPR020783 Ribosomal protein L112C C-terminal IPR020784 Ribosomal protein L112C N-terminal IPR020785 Ribosomal protein L112C conserved site IPR036769 Ribosomal protein L112C C-terminal domain superfamily IPR036796 Ribosomal protein L11/L122C N-terminal domain superfamily	3.03e-75	CE17986	rpl-12	60S ribosomal protein L12	1e-75	P35979	Mus musculus	60S ribosomal protein L12	2e-78	9.88931	0.0435955	8.54953	0.0936007	0.313822	0.266188		66.1574	9.14239	21.687	134.77	9.44857	34.2357		3.10849	27.5931	0.266188	11.6137	10.8874	18.674
Mg71217	1272					Minc3s00663g15785	IPR002067 Mitochondrial carrier protein IPR002113 Adenine nucleotide translocator 1 IPR018108 Mitochondrial substrate/solute carrier IPR023395 Mitochondrial carrier domain superfamily	1.19e-91	CE14263	ant-1.1		2e-92	Q8CJG1	Mus musculus	Protein argonaute-1	9e-151	9.88191	0.0374371	9.28349	0.0553936	0.266188	0.266188		16.739	15.0599	6.78555	32.1224	4.22411	38.4018		1.68734	19.395	8.38948	26.5074	62.5776	44.1939
Mg64739	1346																9.82653	0.0264547	8.40032	0.0654134	0.266188	0.266188		23.7988	6.18366	22.6183	48.6404	2.79926	18.2124		8.7931	2.99888	6.35865	17.2875	0.266188	8.63337
Mg59197	963																9.82146	0.000427836	-5.12548e-15	1	0.266188	0.266188		23.7988	6.18366	17.0303	34.4821	5.0157	15.0077		0.266188	0.266188	6.35865	13.0322	1.68236	10.3068
Mg59353	1278												Q54CS6	Dictyostelium discoideum	Protein dcd1B	2e-69	9.81753	0.0407847	8.97599	0.0668221	0.266188	0.266188		4.9727	26.8948	18.8929	58.0793	1.84936	27.1854		8.7931	8.46427	27.3438	61.2592	40.981	33.7349
Mg79867	292					Minc3s05747g38765	IPR000426 Proteasome alpha-subunit2C N-terminal domain IPR001353 Proteasome2C subunit alpha/beta IPR023332 Proteasome alpha-type subunit IPR029055 Nucleophile aminohydrolases2C N-terminal	1.02e-39	CE30307	pas-3	Proteasome subunit alpha type-4	1e-37	P52427	Spinacia oleracea	SPIOL Proteasome subunit alpha type-4	2e-43	9.80528	0.019466	7.69646	0.0596575	0.266188	0.266188		23.7988	6.18366	3.0602	3.80577	0.899456	6.67554		0.266188	7.09792	0.266188	3.10307	0.974272	5.2865
Mg63322	194																9.80057	0.0289503	6.40537	0.128497	0.266188	0.266188		23.7988	6.18366	3.0602	0.266188	0.424505	0.586656		1.68734	1.63253	2.97395	1.68463	0.266188	0.684547
Mg67498	411					Minc3s09219g43026	IPR001781 Zinc finger2C LIM-type	2.56e-20	CE29767	exc-9		1e-19	Q0VFX8	Bos taurus	Cysteine-rich protein 2	6e-19	9.77759	0.042794	6.38944	0.181723	0.266188	0.266188		0.266188	29.8535	3.99154	7.34534	0.266188	0.907123		0.266188	2.99888	1.62007	0.266188	7.34703	0.684547
Mg40647	2117																9.77133	0.0416295	8.42347	0.1111	0.313822	0.266188		56.7444	12.1011	165.113	284.612	21.9556	145.117		11.6354	16.6623	53.7445	161.259	9.47128	86.0298
Mg64920	353					Minc3s00113g04969	IPR009071 High mobility group box domain IPR036910 High mobility group box domain superfamily	3.12e-14	CE28233	hmg-1.2	High mobility group protein 1.2	3e-13	Q4WY33	Neosartorya fumigata	ASPFU Non-histone chromosomal protein 6	4e-23	9.76426	0.0248761	5.41199	0.275419	0.266188	0.266188		14.3857	15.0599	0.266188	10.8849	0.741139	10.5211		0.266188	1.63253	0.943129	3.8123	0.266188	0.684547
Mg61964	298												Q24F59	Tetrahymena thermophila	60S ribosomal protein L36	1e-23	9.74987	0.0457246	7.73029	0.110072	0.266188	0.266188		28.5053	0.266188	11.4422	0.266188	0.582822	0.266188		5.9508	1.63253	1.62007	0.97541	0.266188	0.266188
Mg65805	410																9.72517	0.0412631	6.38862	0.168127	0.266188	0.266188		4.9727	23.9361	1.19753	9.70506	0.582822	1.54806		0.266188	2.99888	4.32783	0.266188	1.32831	0.266188
Mg66207	1428					Minc3s07075g40689	IPR006424 Glyceraldehyde-3-phosphate dehydrogenase2C type I IPR020828 Glyceraldehyde 3-phosphate dehydrogenase2C NAD(P) binding domain IPR020829 Glyceraldehyde 3-phosphate dehydrogenase2C catalytic domain IPR020830 Glyceraldehyde 3-phosphate dehydrogenase2C active site IPR020831 Glyceraldehyde/Erythrose phosphate dehydrogenase family IPR036291 NAD(P)-binding domain superfamily	1.04e-168	CE07370	gpd-3	Glyceraldehyde-3-phosphate dehydrogenase 3	2e-166	P49637	Arabidopsis thaliana	60S ribosomal protein L27a-3	1e-172	9.69741	0.0450693	8.71077	0.082076	0.266188	0.266188		2.61945	26.8948	16.0989	133.59	7.07382	28.1469		5.9508	8.46427	0.943129	10.1953	10.5334	8.21501
Mg59552	1481																9.69514	0.0396382	8.97881	0.064887	0.266188	0.266188		23.7988	3.22492	26.3436	49.8203	4.0658	22.058		10.2143	7.09792	14.4819	22.2521	0.974272	27.0412
Mg58927	463																9.65425	0.0464723	8.68184	0.0909072	0.313822	0.266188		56.7444	6.18366	180.014	225.619	19.5809	109.225		8.7931	24.8604	41.5596	86.7912	5.57682	68.4587
Mg60952	250																9.65085	0.0468777	6.40538	0.165983	0.266188	0.266188		23.7988	3.22492	2.12886	0.266188	0.266188	0.586656		1.68734	1.63253	2.29701	0.97541	0.266188	0.684547
Mg69426	235					Minc3s03293g33437	IPR000289 Ribosomal protein S28e IPR012340 Nucleic acid-binding2C OB-fold	4.63e-25	CE21842	rps-28	40S ribosomal protein S28	2e-16	Q95Y04	Caenorhabditis elegans	40S ribosomal protein S28	3e-15	9.61749	0.0152094	7.39685	0.0553586	0.266188	0.266188		0.266188	26.8948	1.19753	15.6044	0.424505	1.22759		3.10849	2.99888	1.62007	1.68463	10.5334	1.93962
Mg63434	1301					Minc3s05778g38817	IPR000169 Cysteine peptidase2C cysteine active site IPR000668 Peptidase C1A2C papain C-terminal IPR013201 Cathepsin propeptide inhibitor domain (I29) IPR025660 Cysteine peptidase2C histidine active site IPR025661 Cysteine peptidase2C asparagine active site IPR038765 Papain-like cysteine peptidase superfamily IPR039417 Papain-like cysteine endopeptidase	2.85e-72	CE35305	tag-196		5e-74	P04988	Dictyostelium discoideum	Cysteine proteinase 1	5e-124	9.617	0.0333207	7.97554	0.11859	0.266188	0.266188		14.3857	12.1011	39.3824	59.2591	8.49867	38.0813		3.10849	5.73157	9.74336	57.0039	3.09852	27.0412
Mg60855	654					Minc3s01504g24331	IPR002715 Nascent polypeptide-associated complex NAC domain IPR016641 Nascent polypeptide-associated complex subunit alpha IPR038187 NAC A/B domain superfamily	1.33e-32	CE33239	icd-2	Nascent polypeptide-associated complex subunit alpha	5e-28	P45432	Arabidopsis thaliana	COP9 signalosome complex subunit 1	9e-33	9.56762	0.000528605	-5.12548e-15	1	0.266188	0.266188		19.0923	6.18366	18.8929	29.7627	5.64897	8.59834		0.266188	0.266188	7.71254	5.93996	1.68236	15.3271
Mg63916	646					Minc3s02433g30019	IPR018108 Mitochondrial substrate/solute carrier IPR023395 Mitochondrial carrier domain superfamily	1.32e-62	CE09162		Phosphate carrier protein, mitochondrial	3e-59	Q5ZMD6	Gallus gallus	Histone H2A.Z	4e-72	9.56389	0.00548783	6.39518	0.105429	0.266188	0.266188		19.0923	6.18366	14.2363	29.7627	2.48263	10.2007		0.266188	2.99888	1.62007	10.9045	0.266188	4.03142
Mg61020	819																9.56163	0.00244637	-5.12548e-15	1	0.266188	0.266188		19.0923	6.18366	9.57957	13.2446	2.32431	10.8416		0.266188	0.266188	4.32783	15.8691	0.974272	5.70486
Mg62468	633					Minc3s00960g19311	IPR004000 Actin family IPR004001 Actin2C conserved site IPR020902 Actin/actin-like conserved site	2.27e-97	CE28620	act-4	Actin-4	5e-97	P17126	Hydra vulgaris	HYDVU Actin, non-muscle 6.2	3e-99	9.55222	0.00158095	5.42606	0.248265	0.266188	0.266188		21.4455	3.22492	71.9792	4.98562	2.16599	2.18899		1.68734	0.266188	5.68171	15.8691	9.82532	12.817
Mg63486	442					Minc3s05738g38748	IPR021138 60S ribosomal protein L18a/ L202C eukaryotes IPR023573 Ribosomal protein 50S-L18Ae/60S-L20/60S-L18A IPR028877 50S ribosomal protein L18Ae/60S ribosomal protein L20 and L18a	1.96e-47	CE21392	rpl-20	60S ribosomal protein L18a	5e-44	Q54MK8	Dictyostelium discoideum	60S ribosomal protein L18a	4e-53	9.49636	0.0408715	-5.12548e-15	1	0.266188	0.266188		23.7988	0.266188	29.1377	0.266188	0.582822	0.266188		0.266188	0.266188	4.32783	0.97541	0.974272	0.266188
Mg69610	587												P80146	Thermus	THESR Extracellular serine proteinase	1e-45	9.4527	0.0320378	6.42155	0.139686	0.266188	0.266188		0.266188	23.9361	2.12886	6.16548	0.424505	2.18899		3.10849	0.266188	3.65089	1.68463	3.80661	2.77634
Mg66694	789					Minc3s01745g26017	IPR001757 P-type ATPase IPR004014 Cation-transporting P-type ATPase2C N-terminal IPR006068 Cation-transporting P-type ATPase2C C-terminal IPR006408 P-type ATPase2C subfamily IIB IPR008250 P-type ATPase2C A domain superfamily IPR018303 P-type ATPase2C phosphorylation site IPR023214 HAD superfamily IPR023298 P-type ATPase2C transmembrane domain superfamily IPR023299 P-type ATPase2C cytoplasmic doma…	5.49e-85	CE28747	mca-2	Calcium-transporting ATPase	2e-84	P63018	Rattus norvegicus	Heat shock cognate 71 kDa protein	2e-85	9.43453	0.016473	7.38044	0.0623637	0.266188	0.266188		0.266188	23.9361	4.92288	25.0432	0.266188	1.54806		0.266188	5.73157	7.71254	8.77685	6.99299	1.93962
Mg59828	271																9.42341	0.0402726	5.43513	0.243073	0.266188	0.266188		2.61945	20.9773	5.85422	2.62591	0.266188	0.586656		1.68734	0.266188	1.62007	4.52152	0.62023	0.266188
Mg65491	285																9.38918	0.0443029	6.99146	0.124624	0.266188	0.266188		4.9727	18.0186	1.19753	6.16548	0.741139	0.586656		3.10849	1.63253	1.62007	0.266188	2.74448	0.266188
Mg65708	297																9.38911	0.0436252	-5.12548e-15	1	0.266188	0.266188		4.9727	18.0186	5.85422	4.98562	0.266188	0.586656		0.266188	0.266188	1.62007	0.266188	0.974272	2.77634
Mg60186	201					Minc3s01886g26965	IPR000217 Tubulin IPR002452 Alpha tubulin IPR003008 Tubulin/FtsZ2C GTPase domain IPR008280 Tubulin/FtsZ2C C-terminal IPR017975 Tubulin2C conserved site IPR018316 Tubulin/FtsZ2C 2-layer sandwich domain IPR023123 Tubulin2C C-terminal IPR036525 Tubulin/FtsZ2C GTPase domain superfamily IPR037103 Tubulin/FtsZ2C C-terminal domain superfamily	7.13e-28	CE18680	tba-4	Tubulin alpha chain	1e-28	P50258	Physarum polycephalum	PHYPO Tubulin alpha-1A chain	1e-30	9.37235	0.0344694	7.3861	0.0887987	0.266188	0.266188		19.0923	3.22492	6.78555	0.266188	0.424505	1.54806		1.68734	4.36523	1.62007	1.68463	0.62023	0.684547
Mg69320	824					Minc3s01930g27271	IPR001593 Ribosomal protein S3Ae IPR018281 Ribosomal protein S3Ae2C conserved site IPR027500 40S ribosomal protein S1/32C eukaryotes	6.26e-90	CE00664	rps-1	40S ribosomal protein S3a	1e-80	A8HS48	Chlamydomonas reinhardtii	CHLRE 40S ribosomal protein S3a	6e-101	9.35848	0.016473	7.93447	0.0558285	0.290005	0.266188		33.2118	3.22492	8.64823	33.3022	6.12392	52.8228		8.7931	5.73157	13.1281	36.4365	51.6023	47.5408
Mg63465	902					Minc3s05325g38024	IPR000169 Cysteine peptidase2C cysteine active site IPR000668 Peptidase C1A2C papain C-terminal IPR013201 Cathepsin propeptide inhibitor domain (I29) IPR025660 Cysteine peptidase2C histidine active site IPR025661 Cysteine peptidase2C asparagine active site IPR038765 Papain-like cysteine peptidase superfamily IPR039417 Papain-like cysteine endopeptidase	2.24e-83	CE16333	cpl-1		2e-87	P25782	Homarus americanus	HOMAM Digestive cysteine proteinase 2	4e-96	9.27702	0.0302756	-5.12548e-15	1	0.266188	0.266188		14.3857	6.18366	45.9017	101.734	12.14	31.0311		0.266188	0.266188	20.5744	40.6918	2.39044	21.6025
Mg64344	737					Minc3s00176g06801	IPR000692 Fibrillarin IPR020813 Fibrillarin2C conserved site IPR029063 S-adenosyl-L-methionine-dependent methyltransferase	3.25e-121	CE12920	fib-1	rRNA 2'-O-methyltransferase fibrillarin	2e-121	P07436	Physarum polycephalum	PHYPO Tubulin beta-1 chain	6e-132	9.25852	0.00960323	6.39546	0.132016	0.266188	0.266188		14.3857	6.18366	17.0303	28.5828	1.21609	12.1235		0.266188	2.99888	4.32783	11.6137	0.266188	5.2865
Mg62962	326					Minc3s05234g37853	IPR000582 Acyl-CoA-binding protein2C ACBP IPR014352 FERM/acyl-CoA-binding protein superfamily IPR035984 Acyl-CoA binding protein superfamily	1.61e-13	CE08720	acbp-1	Acyl-CoA-binding protein homolog 1	1e-14	Q5FXM5	Dictyostelium discoideum	Acyl-CoA-binding protein	2e-15	9.25568	0.00205788	-5.12548e-15	1	0.266188	0.266188		14.3857	6.18366	11.4422	16.7842	1.84936	15.6486		0.266188	0.266188	7.0356	5.93996	1.68236	4.44978
Mg64257	446					Minc3s00075g03696	IPR001210 Ribosomal protein S17e IPR018273 Ribosomal protein S17e2C conserved site IPR036401 Ribosomal protein S17e-like superfamily	2.88e-53	CE26948	rps-17	40S ribosomal protein S17	4e-50	Q9SJ36	Arabidopsis thaliana	40S ribosomal protein S17-2	3e-55	9.22667	0.0162094	6.41108	0.227379	0.266188	0.266188		19.0923	0.266188	29.1377	30.9425	12.2983	27.5059		3.10849	0.266188	16.5128	24.3797	1.68236	19.5107
Mg77127	491					Minc3s00111g04908	IPR001806 Small GTPase IPR027417 P-loop containing nucleoside triphosphate hydrolase	4.99e-78	CE09711	rab-5		1e-76	Q86JP3	Dictyostelium discoideum	Ras-related protein Rab-5A	1e-84	9.22019	0.0360252	7.39689	0.0902433	0.266188	0.266188		2.61945	18.0186	0.266188	6.16548	0.266188	0.907123		3.10849	2.99888	1.62007	1.68463	10.1794	1.10291
Mg60592	314					Minc3s00062g03146	IPR001680 WD40 repeat IPR015943 WD40/YVTN repeat-like-containing domain superfamily IPR017986 WD40-repeat-containing domain IPR019775 WD40 repeat2C conserved site IPR020472 G-protein beta WD-40 repeat IPR036322 WD40-repeat-containing domain superfamily	1.40e-48	CE06090	rack-1	Guanine nucleotide-binding protein subunit beta-2-like 1	5e-50	Q40832	Pelvetia fastigiata	PELFA Tubulin alpha-2 chain	1e-56	9.21244	0.0318807	7.003	0.0988242	0.266188	0.266188		16.739	3.22492	8.64823	1.44605	0.741139	0.266188		4.52965	0.266188	0.266188	0.97541	11.5955	1.10291
Mg64914	971																9.20869	0.0128697	7.38367	0.0603239	0.266188	0.266188		19.0923	0.266188	58.0091	3.80577	3.43253	0.907123		0.266188	5.73157	5.68171	8.77685	8.7632	7.37829
Mg59315	813					Minc3s00583g14629	IPR001698 F-actin-capping protein subunit beta IPR019771 F-actin capping protein2C beta subunit2C conserved site IPR037282 F-actin-capping protein subunit alpha/beta	1.40e-90	CE01608	cap-2	F-actin-capping protein subunit beta	1e-96	P13021	Dictyostelium discoideum	F-actin-capping protein subunit beta	6e-110	9.19956	0.0264677	6.9717	0.124531	0.266188	0.266188		19.0923	0.266188	9.57957	20.3238	4.69906	15.0077		0.266188	4.36523	0.266188	15.8691	1.68236	5.70486
Mg62858	436	SP															9.14414	0.0317971	-5.12548e-15	1	0.266188	0.266188		7.32596	12.1011	0.266188	7.34534	0.424505	4.43226		0.266188	0.266188	2.29701	5.93996	6.2849	3.1947
Mg71533	223					Minc3s02318g29430	IPR001680 WD40 repeat IPR015943 WD40/YVTN repeat-like-containing domain superfamily IPR017986 WD40-repeat-containing domain IPR019775 WD40 repeat2C conserved site IPR036322 WD40-repeat-containing domain superfamily	4.39e-21	CE06090	rack-1	Guanine nucleotide-binding protein subunit beta-2-like 1	1e-15	O14832	Homo sapiens	Phytanoyl-CoA dioxygenase, peroxisomal	6e-17	9.03312	0.0484995	5.43393	0.278871	0.266188	0.266188		0.266188	18.0186	0.266188	6.16548	0.582822	1.54806		1.68734	0.266188	2.29701	2.39385	8.7632	1.52127
Mg66346	403	SP															9.03175	0.0340707	-5.12548e-15	1	0.266188	0.266188		0.266188	18.0186	2.12886	3.80577	0.582822	2.82993		0.266188	0.266188	3.65089	6.64918	5.22278	1.93962
Mg60652	433																9.02892	0.0370509	4.76253	0.359496	0.337639	0.266188		54.3911	0.266188	10.5109	1.44605	0.582822	0.266188		3.10849	0.266188	7.0356	0.266188	1.32831	0.684547
Mg59162	546																9.02434	0.0434678	6.38837	0.147353	0.266188	0.266188		14.3857	3.22492	5.85422	9.70506	0.899456	1.54806		0.266188	2.99888	0.266188	3.8123	0.266188	0.266188
Mg77659	599					Minc3s00594g14836	IPR000795 Transcription factor2C GTP-binding domain IPR004161 Translation elongation factor EFTu-like2C domain 2 IPR005225 Small GTP-binding protein domain IPR009000 Translation protein2C beta-barrel domain superfamily IPR014721 Ribosomal protein S5 domain 2-type fold2C subgroup IPR020568 Ribosomal protein S5 domain 2-type fold IPR027417 P-loop containing nucleoside triphosphate hydrolase IPR0311…	4.50e-78	CE15900	eef-2	Elongation factor 2	1e-70	O14460	Schizosaccharomyces pombe	Elongation factor 2	2e-79	9.0202	0.0481374	8.21594	0.0817137	0.266188	0.266188		0.266188	18.0186	0.266188	14.4245	0.266188	3.79133		8.7931	1.63253	1.62007	1.68463	12.6577	2.77634
Mg66802	1699					Minc3s00055g02887	IPR000741 Fructose-bisphosphate aldolase2C class-I IPR013785 Aldolase-type TIM barrel IPR029768 Fructose-bisphosphate aldolase class-I active site	2.81e-163	CE16341	aldo-1	Fructose-bisphosphate aldolase 1	8e-154	Q9GP32	Echinococcus	ECHMU Fructose-bisphosphate aldolase	2e-161	8.9795	0.0184961	7.26634	0.0713069	0.313822	0.266188		9.67922	32.8123	14.2363	121.792	6.44055	31.3515		1.68734	11.197	2.29701	8.06763	8.40915	7.37829
Mg67182	1389					Minc3s00774g17163	IPR008146 Glutamine synthetase2C catalytic domain IPR008147 Glutamine synthetase2C beta-Grasp domain IPR014746 Glutamine synthetase/guanido kinase2C catalytic domain IPR027302 Glutamine synthetase2C N-terminal conserved site IPR027303 Glutamine synthetase2C glycine-rich site IPR036651 Glutamine synthetase2C N-terminal domain superfamily	6.61e-162	CE24078	gln-3	Glutamine synthetase	0.0	P20478	Drosophila melanogaster	Glutamine synthetase 2 cytoplasmic	2e-171	8.89715	0.0212567	7.38561	0.0781857	0.266188	0.266188		7.32596	9.14239	6.78555	74.5973	8.97362	19.4942		0.266188	5.73157	1.62007	15.1598	5.93086	2.35798
Mg61932	261																8.86563	0.00639317	-5.12548e-15	1	0.266188	0.266188		9.67922	6.18366	15.1676	12.0648	5.64897	22.058		0.266188	0.266188	7.0356	12.323	0.266188	8.21501
Mg62290	441																8.8644	0.0013668	-5.12548e-15	1	0.266188	0.266188		9.67922	6.18366	30.069	39.2015	2.48263	4.75273		0.266188	0.266188	0.943129	0.266188	0.266188	0.266188
Mg74653	431																8.86436	0.00339113	6.40523	0.0534648	0.266188	0.266188		9.67922	6.18366	7.71689	4.98562	2.00768	3.79133		1.68734	1.63253	1.62007	33.5996	2.74448	12.817
Mg75856	476					Minc3s00128g05465	IPR000426 Proteasome alpha-subunit2C N-terminal domain IPR001353 Proteasome2C subunit alpha/beta IPR023332 Proteasome alpha-type subunit IPR029055 Nucleophile aminohydrolases2C N-terminal	5.59e-61	CE05371	pas-4	Proteasome subunit alpha type-7	1e-66	Q9PTW9	Carassius	CARAU Proteasome subunit alpha type-7	1e-80	8.85966	0.016973	6.99055	0.0562344	0.266188	0.266188		9.67922	6.18366	5.85422	8.5252	0.266188	3.47086		3.10849	1.63253	2.97395	4.52152	3.80661	4.44978
Mg67667	641																8.85934	0.0208014	6.97863	0.0646739	0.266188	0.266188		9.67922	6.18366	3.0602	4.98562	0.266188	4.43226		1.68734	2.99888	3.65089	4.52152	4.51469	4.86814
Mg70991	788					Minc3s03064g32628	IPR001197 Ribosomal protein L10e IPR016180 Ribosomal protein L10e/L16 IPR018255 Ribosomal protein L10e2C conserved site IPR036920 Ribosomal protein L10e/L16 superfamily	2.79e-104	CE01543	rpl-10	60S ribosomal protein L10	1e-96	Q54J69	Dictyostelium discoideum	60S ribosomal protein L10	3e-106	8.85061	0.0138508	6.41044	0.177323	0.266188	0.266188		12.0325	3.22492	3.0602	21.5037	5.17401	32.6334		3.10849	0.266188	14.4819	17.9967	56.5589	35.4084
Mg48662	1035					Minc3s03293g33436	IPR005485 Ribosomal protein L5 eukaryotic/L18 archaeal IPR025607 Ribosomal protein L5 eukaryotic/L18 archaeal2C C-terminal	1.94e-122	CE02255	rpl-5	60S ribosomal protein L5	5e-107	O76190	Bombyx mori	BOMMO 60S ribosomal protein L5	1e-124	8.83195	0.0488245	7.91045	0.0909072	0.313822	0.266188		16.739	20.9773	22.6183	180.785	16.2562	39.6837		8.7931	11.197	0.266188	16.5783	12.3036	25.7861
Mg78214	1262																8.83099	0.0383041	6.97188	0.142161	0.266188	0.266188		12.0325	3.22492	3.0602	35.662	1.05777	21.7375		0.266188	4.36523	0.943129	8.77685	1.68236	6.54157
Mg59764	593					Minc3s05325g38024	IPR000169 Cysteine peptidase2C cysteine active site IPR000668 Peptidase C1A2C papain C-terminal IPR013201 Cathepsin propeptide inhibitor domain (I29) IPR025660 Cysteine peptidase2C histidine active site IPR025661 Cysteine peptidase2C asparagine active site IPR038765 Papain-like cysteine peptidase superfamily IPR039417 Papain-like cysteine endopeptidase	6.71e-39	CE47424	cpl-1		5e-39	O94658	Schizosaccharomyces pombe	60S ribosomal protein L36-B	1e-49	8.82625	0.0107448	6.97038	0.0522563	0.266188	0.266188		12.0325	3.22492	40.3137	0.266188	0.741139	0.907123		0.266188	4.36523	4.32783	6.64918	5.22278	4.86814
Mg75347	660																8.82074	0.0145862	6.96852	0.0553586	0.266188	0.266188		12.0325	3.22492	1.19753	9.70506	0.582822	7.95741		0.266188	4.36523	2.97395	2.39385	8.40915	9.88845
Mg60375	1444		NXFT01004256.1.11040_g	IPR000217 Tubulin IPR002453 Beta tubulin IPR003008 Tubulin/FtsZ 2C GTPase domain IPR008280 Tubulin/FtsZ 2C C-terminal IPR013838 Beta tubulin 2C autoregulation binding site IPR017975 Tubulin 2C conserved site IPR018316 Tubulin/FtsZ 2C 2-layer sandwich domain IPR023123 Tubulin 2C C-terminal IPR036525 Tubulin/FtsZ 2C GTPase domain superfamily IPR037103 Tubulin/FtsZ 2C C-terminal domain superfamily	1.88e-17	Minc3s00686g16069	IPR000217 Tubulin IPR002453 Beta tubulin IPR003008 Tubulin/FtsZ2C GTPase domain IPR008280 Tubulin/FtsZ2C C-terminal IPR013838 Beta tubulin2C autoregulation binding site IPR017975 Tubulin2C conserved site IPR018316 Tubulin/FtsZ2C 2-layer sandwich domain IPR023123 Tubulin2C C-terminal IPR036525 Tubulin/FtsZ2C GTPase domain superfamily IPR037103 Tubulin/FtsZ2C C-terminal domain superfamily	0.0	CE00850	tbb-4	Tubulin beta-4 chain	0.0	P12458	Physarum polycephalum	PHYPO Tubulin beta-2 chain	0.0	8.81872	0.0498432	7.3861	0.146379	0.266188	0.266188		14.3857	0.266188	15.1676	63.9786	11.8233	15.9691		0.266188	5.73157	3.65089	15.1598	1.68236	18.674
Mg62811	320																8.80624	0.0347304	7.77287	0.0764004	0.266188	0.29026		19.0923	6.18366	48.6958	66.3383	11.8233	60.5141		3.10849	9.83061	14.4819	39.2734	3.09852	31.6431
Mg62740	415					Minc3s01526g24494	IPR002048 EF-hand domain IPR011992 EF-hand domain pair IPR018247 EF-Hand 12C calcium-binding site IPR039030 Calmodulin	5.32e-18	CE13902	cmd-1	Calmodulin	2e-17	P08053	Physarum polycephalum	PHYPO Myosin regulatory light chain	1e-18	8.80114	0.0367472	6.39608	0.228787	0.266188	0.266188		14.3857	0.266188	30.069	19.1439	2.16599	11.4825		0.266188	2.99888	4.32783	17.2875	0.266188	7.79665
Mg61142	1759					Minc3s00109g04813	IPR000194 ATPase2C F1/V1/A1 complex2C alpha/beta subunit2C nucleotide-binding domain IPR003593 AAA+ ATPase domain IPR004100 ATPase2C F1/V1/A1 complex2C alpha/beta subunit2C N-terminal domain IPR005722 ATP synthase2C F1 complex2C beta subunit IPR020003 ATPase2C alpha/beta subunit2C nucleotide-binding domain2C active site IPR024034 ATPase2C F1/V1 complex2C beta/alpha subunit2C C-terminal IPR027417 …	0.0	CE29950	atp-2	ATP synthase subunit beta, mitochondrial	0.0	C5FTZ6	Arthroderma	ARTOC Leucine aminopeptidase 2	0.0	8.80007	0.030168	7.60131	0.0744578	0.361455	0.266188		30.8585	26.8948	54.2838	168.986	33.9877	62.7573		8.7931	16.6623	23.2822	62.6777	3.80661	50.8876
Mg61477	770												O05389	Bacillus subtilis	BACSU Uncharacterized oxidoreductase yrbE	9e-36	8.78494	0.0122123	6.39317	0.0952541	0.266188	0.266188		14.3857	0.266188	12.3736	19.1439	1.53272	5.39367		0.266188	2.99888	8.38948	8.06763	0.266188	2.77634
Mg61803	493					Minc3s03112g32824	IPR000439 Ribosomal protein L15e IPR012678 Ribosomal protein L23/L15e core domain superfamily IPR024794 Ribosomal protein L15e core domain superfamily	2.48e-44	CE12148	rpl-15	60S ribosomal protein L15	2e-39	Q8X034	Neurospora crassa	60S ribosomal protein L15	7e-58	8.77581	0.0270262	-5.12548e-15	1	0.266188	0.266188		14.3857	0.266188	28.2063	2.62591	1.69104	0.266188		0.266188	0.266188	5.68171	2.39385	1.68236	1.93962
Mg43671	856																8.73495	0.0086721	-5.12548e-15	1	0.266188	0.266188		0.266188	15.0599	3.99154	40.3814	5.0157	15.0077		0.266188	0.266188	0.266188	0.97541	4.16065	6.54157
Mg79201	352																8.71702	0.032554	7.3969	0.0697539	0.266188	0.266188		2.61945	12.1011	4.92288	1.44605	0.424505	4.43226		3.10849	2.99888	2.29701	5.23074	0.62023	1.52127
Mg66553	1598					Minc3s00727g16575	IPR000597 Ribosomal protein L3 IPR009000 Translation protein2C beta-barrel domain superfamily	3.35e-125	CE36997	rpl-3	60S ribosomal protein L3	2e-107	O16797	Drosophila melanogaster	60S ribosomal protein L3	4e-118	8.66597	0.0164374	6.40512	0.164522	0.266188	0.266188		2.61945	12.1011	25.4123	124.151	11.1901	33.5948		1.68734	1.63253	0.266188	3.8123	9.82532	8.63337
Mg71959	781					Minc3s00248g08522	IPR002136 Ribosomal protein L4/L1e IPR013000 Ribosomal protein L4/L1e2C eukaryotic/archaeal2C conserved site IPR023574 Ribosomal protein L4 domain superfamily IPR025755 60S ribosomal protein L42C C-terminal domain	7.75e-98	CE07669	rpl-4	60S ribosomal protein L4	9e-69	P49165	Urechis caupo	URECA 60S ribosomal protein L4	5e-85	8.66468	0.0304097	5.4113	0.230328	0.266188	0.266188		4.9727	9.14239	1.19753	0.266188	3.90748	14.0463		0.266188	1.63253	0.266188	0.266188	0.62023	6.12322
Mg65770	615					Minc3s00594g14836	IPR000795 Transcription factor2C GTP-binding domain IPR004161 Translation elongation factor EFTu-like2C domain 2 IPR005225 Small GTP-binding protein domain IPR009000 Translation protein2C beta-barrel domain superfamily IPR014721 Ribosomal protein S5 domain 2-type fold2C subgroup IPR020568 Ribosomal protein S5 domain 2-type fold IPR027417 P-loop containing nucleoside triphosphate hydrolase IPR0311…	9.27e-86	CE15900	eef-2	Elongation factor 2	5e-82	Q23716	Cryptosporidium parvum	CRYPV Elongation factor 2	6e-89	8.65637	0.0074038	6.39475	0.0813553	0.266188	0.266188		4.9727	9.14239	3.99154	23.8634	0.582822	4.75273		0.266188	2.99888	2.97395	22.9613	8.7632	6.95993
Mg73607	453																8.61434	0.03591	6.99103	0.0891455	0.266188	0.266188		7.32596	6.18366	0.266188	3.80577	0.899456	2.50946		3.10849	1.63253	0.266188	3.8123	4.86873	6.95993
Mg52890	511					Minc3s00897g18645	IPR000530 Ribosomal protein S12e IPR004038 Ribosomal protein L7Ae/L30e/S12e/Gadd45 IPR029064 50S ribosomal protein L30e-like	1.92e-25	CE26896	rps-12	40S ribosomal protein S12	6e-28	P84175	Gallus gallus	40S ribosomal protein S12	4e-34	8.60884	0.0107448	7.10677	0.051982	0.313822	0.266188		14.3857	18.0186	63.5972	106.454	24.3304	58.5913		5.9508	5.73157	12.4511	43.5287	3.80661	25.7861
Mg78153	732					Minc3s05003g37412	IPR000245 V-ATPase proteolipid subunit IPR002379 V-ATPase proteolipid subunit C-like domain IPR011555 V-ATPase proteolipid subunit C2C eukaryotic IPR035921 F/V-ATP synthase subunit C superfamily	3.23e-27					Q03684	Nicotiana tabacum	TOBAC Luminal-binding protein 4	1e-16	8.56894	0.0230171	6.99007	0.0682489	0.266188	0.266188		9.67922	3.22492	2.12886	4.98562	0.741139	24.3012		3.10849	1.63253	0.266188	3.8123	1.32831	3.1947
Mg68912	1852					Minc3s00022g01394	IPR004240 Nonaspanin (TM9SF)	2.63e-148	CE16751		Transmembrane 9 superfamily member	3e-144	Q55FP0	Dictyostelium discoideum	Putative phagocytic receptor 1a	2e-159	8.56532	0.0316833	-5.12548e-15	1	0.266188	0.266188		9.67922	3.22492	2.12886	12.0648	5.80728	4.75273		0.266188	0.266188	1.62007	5.23074	0.266188	5.2865
Mg61974	542					Minc3s00152g06205	IPR000589 Ribosomal protein S15 IPR009068 S15/NS12C RNA-binding IPR012606 Ribosomal protein S13/S152C N-terminal IPR023029 Ribosomal protein S15P	4.87e-75	CE04009	rps-13	40S ribosomal protein S13	5e-66	P62302	Glycine max	SOYBN 40S ribosomal protein S13	2e-74	8.56393	0.0195998	5.41142	0.188125	0.266188	0.266188		9.67922	3.22492	18.8929	2.62591	1.53272	0.907123		0.266188	1.63253	5.00477	0.97541	2.0364	1.93962
Mg62373	797																8.55652	0.0482352	6.39773	0.255253	0.266188	0.266188		12.0325	0.266188	15.1676	36.8418	1.84936	16.2896		0.266188	2.99888	13.805	26.5074	0.974272	12.817
Mg37521	1348					Minc3s00090g04234	IPR000795 Transcription factor2C GTP-binding domain IPR004160 Translation elongation factor EFTu/EF1A2C C-terminal IPR004161 Translation elongation factor EFTu-like2C domain 2 IPR004539 Translation elongation factor EF1A2C eukaryotic/archaeal IPR009000 Translation protein2C beta-barrel domain superfamily IPR009001 Translation elongation factor EF1A/initiation factor IF2gamma2C C-terminal IPR02741…	3.01e-116	CE01270	eef-1A.1	Elongation factor 1-alpha	9e-107	P90519	Cryptosporidium parvum	CRYPV Elongation factor 1-alpha	6e-119	8.55128	0.0483861	7.53645	0.0945554	0.599623	0.266188		110.869	23.9361	439.858	763.635	168.715	833.161		34.3738	34.4248	101.807	332.182	25.0491	231.619
Mg64669	1360					Minc3s00932g19014	IPR001844 Chaperonin Cpn60 IPR002423 Chaperonin Cpn60/TCP-1 family IPR018370 Chaperonin Cpn602C conserved site IPR027409 GroEL-like apical domain superfamily IPR027410 TCP-1-like chaperonin intermediate domain superfamily IPR027413 GroEL-like equatorial domain superfamily	3.08e-143	CE27244	hsp-60	Chaperonin homolog Hsp-60, mitochondrial	7e-144	P63039	Rattus norvegicus	60 kDa heat shock protein, mitochondrial	6e-147	8.54204	0.00573807	5.4162	0.225544	0.266188	0.266188		12.0325	0.266188	9.57957	51.0001	4.0658	8.59834		0.266188	1.63253	0.266188	3.10307	4.51469	7.79665
Mg47220	1342												Q58A42	Dictyostelium discoideum	Protein DD3-3	5e-103	8.53352	0.0474671	6.10481	0.326848	0.313822	0.266188		28.5053	0.266188	82.2239	62.7987	13.4065	48.6568		0.266188	5.73157	14.4819	47.0748	5.93086	29.133
Mg65200	796																8.52072	0.024817	-5.12548e-15	1	0.266188	0.266188		12.0325	0.266188	0.266188	2.62591	1.05777	8.91881		0.266188	0.266188	2.97395	10.1953	7.70107	9.05173
Mg68656	258																8.43821	0.0395982	6.96535	0.090553	0.266188	0.266188		0.266188	12.1011	5.85422	2.62591	0.582822	1.22759		0.266188	4.36523	2.97395	4.52152	2.74448	4.44978
Mg69110	805					Minc3s05668g38617	IPR001253 Translation initiation factor 1A (eIF-1A) IPR006196 RNA-binding domain2C S12C IF1 type IPR012340 Nucleic acid-binding2C OB-fold IPR018104 Translation initiation factor 1A (eIF-1A)2C conserved site	3.10e-44	CE17962	eif-1.A		1e-42	P34149	Dictyostelium discoideum	Rho-related protein racC	3e-48	8.42623	0.0282291	5.41265	0.247269	0.266188	0.266188		0.266188	12.1011	2.12886	26.2231	1.69104	8.59834		0.266188	1.63253	0.266188	0.97541	2.39044	2.35798
Mg66086	1048					Minc3s02989g32324	IPR003338 CDC482C N-terminal subdomain IPR003593 AAA+ ATPase domain IPR003959 ATPase2C AAA-type2C core IPR003960 ATPase2C AAA-type2C conserved site IPR004201 CDC482C domain 2 IPR005938 AAA ATPase2C CDC48 family IPR009010 Aspartate decarboxylase-like domain superfamily IPR015415 Vps4 oligomerisation2C C-terminal IPR027417 P-loop containing nucleoside triphosphate hydrolase IPR029067 CDC48 domain 2…	4.17e-167	CE05402	cdc-48.2	Transitional endoplasmic reticulum ATPase homolog 2	1e-153	P54959	Blastocystis	BLAHO Elongation factor 1-alpha	5e-161	8.42493	0.023955	6.39131	0.10023	0.266188	0.266188		0.266188	12.1011	4.92288	30.9425	0.899456	4.1118		0.266188	2.99888	0.943129	1.68463	0.974272	2.77634
Mg47904	757					Minc3s00965g19376	IPR000876 Ribosomal protein S4e IPR002942 RNA-binding S4 domain IPR005824 KOW IPR013843 Ribosomal protein S4e2C N-terminal IPR013845 Ribosomal protein S4e2C central region IPR014722 Ribosomal protein L22C domain 2 IPR018199 Ribosomal protein S4e2C N-terminal2C conserved site IPR032277 40S ribosomal protein S42C C-terminal domain IPR038237 Ribosomal protein S4e2C central domain superfamily IPR0419…	1.69e-119	CE24278	rps-4	40S ribosomal protein S4	2e-112	Q90YS0	Ictalurus punctatus	ICTPU 40S ribosomal protein S4	9e-131	8.4241	0.0241664	6.69609	0.130252	0.313822	0.266188		23.7988	3.22492	41.2451	109.993	16.7312	35.1971		5.9508	2.99888	15.1589	45.6564	4.51469	31.2248
Mg67713	1035					Minc3s00008g00537	IPR004045 Glutathione S-transferase2C N-terminal IPR004046 Glutathione S-transferase2C C-terminal IPR010987 Glutathione S-transferase2C C-terminal-like IPR036249 Thioredoxin-like superfamily IPR036282 Glutathione S-transferase2C C-terminal domain superfamily	2.66e-21	CE25050	gst-3	Glutathione S-transferase 3	7e-23	P46428	Anopheles gambiae	ANOGA Glutathione S-transferase	4e-27	8.40868	0.0157739	-5.12548e-15	1	0.266188	0.266188		0.266188	12.1011	2.12886	42.7411	8.18204	8.91881		0.266188	0.266188	0.266188	1.68463	3.80661	3.61306
Mg73351	1123					Minc3s09484g43249	IPR001752 Kinesin motor domain IPR019821 Kinesin motor domain2C conserved site IPR027417 P-loop containing nucleoside triphosphate hydrolase IPR027640 Kinesin-like protein IPR036961 Kinesin motor domain superfamily	4.11e-47	CE26143	klp-20	Kinesin-like protein klp-20	2e-41	P28739	Emericella nidulans	EMENI Kinesin-like protein klpA	4e-67	8.40472	0.0257816	5.41555	0.315407	0.266188	0.266188		0.266188	12.1011	0.266188	9.70506	2.16599	16.61		0.266188	1.63253	6.35865	14.4506	4.51469	17.8373
Mg69886	553					Minc3s00696g16207	IPR000626 Ubiquitin domain IPR006846 Ribosomal protein S30 IPR019954 Ubiquitin conserved site IPR019956 Ubiquitin IPR029071 Ubiquitin-like domain superfamily	1.50e-32									8.38293	0.042397	7.3847	0.0818987	0.266188	0.266188		0.266188	12.1011	9.57957	62.7987	6.9155	24.6217		0.266188	5.73157	0.266188	1.68463	3.09852	10.3068
Mg68573	1609					Minc3s03777g34773	IPR000504 RNA recognition motif domain IPR012677 Nucleotide-binding alpha-beta plait domain superfamily IPR034126 RNA-binding protein Musashi homologue2C RNA recognition motif 2 IPR034130 RNA-binding protein Musashi homologue2C RNA recognition motif 1 IPR035979 RNA-binding domain superfamily	6.17e-39	CE29337	msi-1		3e-36	P31692	Parachlorella kessleri	PARKE ADP,ATP carrier protein	2e-41	8.3614	0.0114434	-5.12548e-15	1	0.266188	0.266188		2.61945	9.14239	2.12886	43.921	4.0658	10.2007		0.266188	0.266188	0.266188	1.68463	3.80661	7.79665
Mg64858	229					Minc3s07521g41224	IPR000164 Histone H3/CENP-A IPR007125 Histone H2A/H2B/H3 IPR009072 Histone-fold	1.39e-19	CE03253	his-45	Histone H3	4e-18	P08898	Caenorhabditis elegans	Histone H3	7e-17	8.31864	0.0423845	7.97129	0.0618242	0.266188	0.266188		4.9727	6.18366	2.12886	8.5252	0.266188	0.907123		3.10849	5.73157	3.65089	4.52152	0.974272	0.266188
Mg62021	271					Minc3s00928g18964	IPR015590 Aldehyde dehydrogenase domain IPR016160 Aldehyde dehydrogenase2C cysteine active site IPR016161 Aldehyde/histidinol dehydrogenase IPR016162 Aldehyde dehydrogenase2C N-terminal IPR016163 Aldehyde dehydrogenase2C C-terminal IPR029510 Aldehyde dehydrogenase2C glutamic acid active site	4.12e-22	CE45828	alh-2	Aldehyde dehydrogenase	4e-22	P05091	Homo sapiens	Aldehyde dehydrogenase, mitochondrial	3e-26	8.31857	0.0460454	6.96508	0.0985268	0.266188	0.266188		4.9727	6.18366	1.19753	0.266188	0.424505	3.79133		0.266188	4.36523	4.32783	6.64918	3.45257	1.52127
Mg65274	333					Minc3s00059g03042	IPR004843 Calcineurin-like phosphoesterase domain2C ApaH type IPR006186 Serine/threonine-specific protein phosphatase/bis(5-nucleosyl)-tetraphosphatase IPR029052 Metallo-dependent phosphatase-like	3.37e-49	CE22221	pph-4.2	Serine\/threonine-protein phosphatase 4 catalytic subunit 2	2e-54	P03631	Enterobacteria	BPPHX Replication-associated protein A	3e-58	8.31852	0.0349072	7.70375	0.0569725	0.266188	0.266188		4.9727	6.18366	3.0602	12.0648	0.266188	0.907123		1.68734	5.73157	1.62007	4.52152	0.974272	1.10291
Mg59230	475																8.31759	0.0328565	7.40672	0.0620332	0.266188	0.266188		4.9727	6.18366	0.266188	22.6835	0.266188	0.266188		4.52965	1.63253	7.0356	5.23074	0.974272	1.10291
Mg65630	794					Minc3s04725g36888	IPR000504 RNA recognition motif domain IPR012677 Nucleotide-binding alpha-beta plait domain superfamily IPR035585 Serine/arginine-rich splicing factor SRSF4-like2C RNA recognition motif 1 IPR035979 RNA-binding domain superfamily	2.97e-12					O26788	Methanobacterium	692	5e-13	8.3163	0.0114129	-5.12548e-15	1	0.266188	0.266188		4.9727	6.18366	5.85422	17.9641	1.84936	6.0346		0.266188	0.266188	2.97395	11.6137	0.974272	6.95993
Mg71655	654					Minc3s02357g29645	IPR001564 Nucleoside diphosphate kinase IPR023005 Nucleoside diphosphate kinase2C active site IPR034907 Nucleoside diphosphate kinase-like domain IPR036850 Nucleoside diphosphate kinase-like domain superfamily	8.17e-76	CE09650	ndk-1	Nucleoside diphosphate kinase	3e-73	P08879	Drosophila melanogaster	Nucleoside diphosphate kinase	4e-82	8.31453	0.0153774	-5.12548e-15	1	0.266188	0.266188		4.9727	6.18366	1.19753	52.18	3.11589	12.4439		0.266188	0.266188	0.266188	1.68463	5.93086	6.12322
Mg74185	1233																8.31438	0.00643055	5.41591	0.199989	0.266188	0.266188		4.9727	6.18366	1.19753	6.16548	1.05777	15.9691		0.266188	1.63253	5.68171	17.2875	16.1981	14.072
Mg65048	1570																8.31412	0.0061024	-5.12548e-15	1	0.266188	0.266188		4.9727	6.18366	11.4422	26.2231	4.0658	18.8533		0.266188	0.266188	4.32783	8.77685	0.974272	12.3986
Mg61694	973					Minc3s01682g25559	IPR000504 RNA recognition motif domain IPR002004 Polyadenylate-binding protein/Hyperplastic disc protein IPR006515 Polyadenylate binding protein2C human types 12C 22C 32C 4 IPR012677 Nucleotide-binding alpha-beta plait domain superfamily IPR035979 RNA-binding domain superfamily IPR036053 PABC (PABP) domain	4.50e-17	CE36227	pab-1	Polyadenylate-binding protein	3e-22	Q9EPH8	Rattus norvegicus	Polyadenylate-binding protein 1	1e-26	8.31363	0.00322436	-5.12548e-15	1	0.266188	0.266188		4.9727	6.18366	14.2363	27.4029	6.9155	17.8919		0.266188	0.266188	2.97395	17.2875	1.68236	8.21501
Mg62291	1151					Minc3s03863g35013	IPR000192 Aminotransferase class V domain IPR015421 Pyridoxal phosphate-dependent transferase2C major domain IPR015422 Pyridoxal phosphate-dependent transferase domain 1 IPR015424 Pyridoxal phosphate-dependent transferase IPR020578 Aminotransferase class-V2C pyridoxal-phosphate binding site IPR024169 Serine-pyruvate aminotransferase/2-aminoethylphosphonate-pyruvate transaminase	1.38e-92	CE23985	agxt-1	Serine--pyruvate aminotransferase	1e-99	Q54GT6	Dictyostelium discoideum	Serine--pyruvate aminotransferase	7e-126	8.31357	0.0182694	-5.12548e-15	1	0.266188	0.266188		4.9727	6.18366	2.12886	17.9641	27.655	17.5714		0.266188	0.266188	1.62007	11.6137	0.974272	13.6537
Mg71363	1140																8.3128	0.0327664	6.39712	0.178299	0.266188	0.266188		4.9727	6.18366	0.266188	7.34534	1.69104	19.8147		0.266188	2.99888	1.62007	9.48607	36.7325	29.133
Mg50524	1210					Minc3s02642g31009	IPR001461 Aspartic peptidase A1 family IPR001969 Aspartic peptidase2C active site IPR021109 Aspartic peptidase domain superfamily IPR033121 Peptidase family A1 domain	2.25e-107	CE03567	asp-4	Aspartic protease 4	3e-96	O76856	Dictyostelium discoideum	Cathepsin D	2e-137	8.29676	0.0176454	6.68991	0.0853929	0.313822	0.266188		19.0923	6.18366	37.5197	68.698	8.02372	15.3282		3.10849	5.73157	9.74336	35.7273	0.974272	18.674
Mg32560	484					Minc3s02189g28758	IPR001848 Ribosomal protein S10 IPR027486 Ribosomal protein S10 domain IPR036838 Ribosomal protein S10 domain superfamily	5.64e-42	CE29835	rps-20		3e-41	P23403	Xenopus laevis	40S ribosomal protein S20	1e-45	8.28535	0.0179858	6.02188	0.150247	0.361455	0.266188		33.2118	6.18366	36.5884	60.439	10.3985	43.8498		3.10849	5.73157	22.6052	19.4152	3.09852	28.7146
Mg66673	1977					Minc3s01517g24433	IPR000941 Enolase IPR020809 Enolase2C conserved site IPR020810 Enolase2C C-terminal TIM barrel domain IPR020811 Enolase2C N-terminal IPR029017 Enolase-like2C N-terminal IPR036849 Enolase-like2C C-terminal domain superfamily	0.0	CE36954	enol-1	Enolase	0.0	P51913	Gallus gallus	Alpha-enolase	0.0	8.27912	0.00794713	-5.12548e-15	1	0.266188	0.266188		7.32596	3.22492	7.71689	82.8563	7.39045	19.4942		0.266188	0.266188	1.62007	6.64918	6.99299	8.21501
Mg73403	755					Minc3s01461g24016	IPR004000 Actin family IPR015623 Actin-related protein 3 IPR020902 Actin/actin-like conserved site	2.50e-89	CE25554	arx-1	Actin-related protein 3	1e-84	P53490	Acanthamoeba castellanii	ACACA Actin-related protein 3	4e-92	8.26055	0.0287403	5.4123	0.234316	0.266188	0.266188		7.32596	3.22492	1.19753	6.16548	0.899456	8.27787		0.266188	1.63253	0.266188	3.8123	8.7632	8.21501
Mg59900	523												Q7SDV9	Neurospora crassa	Cytochrome c peroxidase, mitochondrial	4e-59	8.254	0.00915381	4.63328	0.298425	0.290005	0.266188		14.3857	3.22492	15.1676	9.70506	1.69104	5.71413		0.266188	1.63253	2.29701	10.1953	0.974272	3.1947
Mg63546	789																8.23581	0.0173882	6.41388	0.121625	0.266188	0.266188		9.67922	0.266188	22.6183	29.7627	2.95758	17.251		3.10849	0.266188	2.97395	11.6137	1.68236	13.6537
Mg65147	1359					Minc3s03228g33208	IPR001114 Adenylosuccinate synthetase IPR018220 Adenylosuccinate synthase2C GTP-binding site IPR027417 P-loop containing nucleoside triphosphate hydrolase IPR033128 Adenylosuccinate synthase2C active site IPR042109 Adenylosuccinate synthetase2C domain 1 IPR042110 Adenylosuccinate synthetase2C domain 2 IPR042111 Adenylosuccinate synthetase2C domain 3	1.34e-123	CE29709	adss-1	Adenylosuccinate synthetase	1e-135	P62912	Rattus norvegicus	60S ribosomal protein L32	4e-166	8.23337	0.0129322	-5.12548e-15	1	0.266188	0.266188		9.67922	0.266188	9.57957	27.4029	10.0818	17.251		0.266188	0.266188	5.68171	7.3584	0.974272	18.2556
Mg64572	1007												P31447	Escherichia coli	ECOLI Uncharacterized sulfatase yidJ	2e-12	8.22393	0.00937942	6.41591	0.0713555	0.266188	0.266188		9.67922	0.266188	15.1676	17.9641	3.43253	14.0463		3.10849	0.266188	5.68171	8.06763	0.974272	8.63337
Mg63938	511					Minc3s02659g31087	IPR005326 Plectin/S102C N-terminal IPR036388 Winged helix-like DNA-binding domain superfamily IPR037447 40S Ribosomal protein S10	1.10e-26	CE09041	rps-10		1e-24	O13614	Schizosaccharomyces pombe	40S ribosomal protein S10-B	6e-33	8.2205	0.047006	5.41505	0.35489	0.266188	0.266188		9.67922	0.266188	12.3736	10.8849	3.74916	6.996		0.266188	1.63253	0.266188	0.266188	30.7138	0.266188
Mg59839	318					Minc3s01242g22009	IPR000231 Ribosomal protein L30e IPR004038 Ribosomal protein L7Ae/L30e/S12e/Gadd45 IPR022991 Ribosomal protein L30e2C conserved site IPR029064 50S ribosomal protein L30e-like IPR039109 Ribosomal protein L30/YlxQ	9.42e-22	CE44850	rpl-30		5e-20	P52808	Schizosaccharomyces pombe	60S ribosomal protein L30-1	5e-26	8.22039	0.014284	5.41504	0.240808	0.266188	0.266188		9.67922	0.266188	3.99154	26.2231	2.16599	12.1235		0.266188	1.63253	3.65089	13.0322	1.32831	6.54157
Mg62160	1108																8.21329	0.0335056	6.41788	0.137762	0.266188	0.266188		9.67922	0.266188	4.92288	9.70506	2.64094	3.79133		3.10849	0.266188	3.65089	0.266188	25.7572	0.684547
Mg64028	1035					Minc3s00168g06628	IPR000011 Ubiquitin/SUMO-activating enzyme E1 IPR000594 THIF-type NAD/FAD binding fold IPR018075 Ubiquitin-activating enzyme E1 IPR018965 Ubiquitin-activating enzyme E12C C-terminal IPR019572 Ubiquitin-activating enzyme2C catalytic cysteine domain IPR032420 Ubiquitin-activating enzyme E12C four-helix bundle IPR033127 Ubiquitin-activating enzyme E12C Cys active site IPR035985 Ubiquitin-activating …	1.80e-44	CE43638	uba-1		3e-33	Q9C3Z5	Podospora anserina	PODAS 60S acidic ribosomal protein P2	2e-56	8.21184	0.0291088	6.41816	0.120853	0.266188	0.266188		9.67922	0.266188	9.57957	17.9641	1.37441	15.6486		3.10849	0.266188	1.62007	3.10307	0.266188	2.77634
Mg65234	745																8.21074	0.0217356	-5.12548e-15	1	0.266188	0.266188		9.67922	0.266188	5.85422	19.1439	1.53272	10.5211		0.266188	0.266188	2.97395	5.93996	0.974272	6.12322
Mg58353	332																8.19855	0.0222992	5.41145	0.183802	0.266188	0.266188		9.67922	0.266188	16.0989	6.16548	1.37441	1.54806		0.266188	1.63253	2.97395	3.8123	2.39044	1.52127
Mg60144	411					Minc3s00024g01505	IPR000554 Ribosomal protein S7e	2.15e-31	CE06577	rps-7	40S ribosomal protein S7	3e-26	Q8LJU5	Oryza sativa	40S ribosomal protein S7	7e-34	8.19533	0.0441743	6.38908	0.127525	0.266188	0.266188		9.67922	0.266188	18.8929	2.62591	0.741139	0.266188		0.266188	2.99888	1.62007	1.68463	2.74448	1.93962
Mg45326	832																8.09105	0.0119421	6.09669	0.0680219	0.313822	0.266188		4.9727	18.0186	2.12886	32.1224	0.741139	2.50946		0.266188	5.73157	4.32783	10.9045	3.80661	4.44978
Mg48754	535												Q9SRC3	Arabidopsis thaliana	ADP-ribosylation factor 2	1e-18	8.00117	0.0125652	5.72726	0.11328	0.337639	0.266188		9.67922	18.0186	17.0303	32.1224	0.266188	3.79133		0.266188	5.73157	11.0972	19.4152	10.1794	6.12322
Mg66088	803												P51643	Xenopus laevis	ADP-ribosylation factor 1	4e-14	7.98199	0.0373584	7.38077	0.054344	0.266188	0.266188		0.266188	9.14239	3.99154	8.5252	2.00768	9.55974		0.266188	5.73157	0.266188	11.6137	13.0117	15.3271
Mg65321	381																7.9428	0.0423845	7.3753	0.0663859	0.266188	0.266188		2.61945	6.18366	2.12886	1.44605	1.84936	2.82993		0.266188	5.73157	5.68171	3.10307	1.32831	1.10291
Mg68473	722																7.9388	0.0301088	-5.12548e-15	1	0.266188	0.266188		2.61945	6.18366	2.12886	2.62591	1.84936	6.67554		0.266188	0.266188	0.266188	1.68463	11.5955	5.2865
Mg71529	340																7.93767	0.0254293	6.9667	0.0520727	0.266188	0.266188		2.61945	6.18366	1.19753	0.266188	1.84936	6.0346		0.266188	4.36523	2.97395	5.23074	4.16065	11.1435
Mg72854	903					Minc3s10302g43968	IPR004045 Glutathione S-transferase2C N-terminal IPR004046 Glutathione S-transferase2C C-terminal IPR010987 Glutathione S-transferase2C C-terminal-like IPR036249 Thioredoxin-like superfamily IPR036282 Glutathione S-transferase2C C-terminal domain superfamily	2.86e-18	CE05656	eef-1G	Probable elongation factor 1-gamma	5e-23	P26642	Xenopus laevis	Elongation factor 1-gamma-A	6e-60	7.92901	0.0464723	7.69893	0.0550478	0.266188	0.266188		2.61945	6.18366	0.266188	7.34534	1.69104	11.1621		0.266188	7.09792	0.266188	7.3584	14.4279	14.072
Mg78458	753	SP				Minc3s08291g42101	IPR002130 Cyclophilin-type peptidyl-prolyl cis-trans isomerase domain IPR020892 Cyclophilin-type peptidyl-prolyl cis-trans isomerase2C conserved site IPR024936 Cyclophilin-type peptidyl-prolyl cis-trans isomerase IPR029000 Cyclophilin-like domain superfamily	1.02e-84	CE20371	cyn-7	Peptidyl-prolyl cis-trans isomerase 7	4e-78	P93211	Solanum lycopersicum	SOLLC 14-3-3 protein 6	1e-89	7.92642	0.0224009	6.40523	0.0960342	0.266188	0.266188		2.61945	6.18366	2.12886	2.62591	0.899456	34.8767		1.68734	1.63253	0.943129	2.39385	2.39044	22.0209
Mg65485	477					Minc3s00259g08820	IPR000306 FYVE zinc finger IPR003595 Protein-tyrosine phosphatase2C catalytic IPR008384 Actin-related protein 2/3 complex subunit 4 IPR010569 Myotubularin-like phosphatase domain IPR011011 Zinc finger2C FYVE/PHD-type IPR011993 PH-like domain superfamily IPR013083 Zinc finger2C RING/FYVE/PHD-type IPR016130 Protein-tyrosine phosphatase2C active site IPR029021 Protein-tyrosine phosphatase-like IPR03…	1.41e-51	CE28899	arx-6	Probable actin-related protein 2\/3 complex subunit 4	8e-59	P05933	Schizosaccharomyces pombe	Calmodulin	3e-63	7.92504	0.0324241	6.39496	0.12731	0.266188	0.266188		2.61945	6.18366	23.5496	17.9641	1.84936	8.27787		0.266188	2.99888	4.32783	13.0322	0.266188	11.9802
Mg68345	1860					Minc3s00981g19546	IPR002208 SecY/SEC61-alpha family IPR019561 Translocon Sec61/SecY2C plug domain IPR023201 SecY domain superfamily IPR030659 SecY conserved site	0.0	CE14954	sec-61		0.0	Q94490	Dictyostelium discoideum	Ubiquitin conjugating enzyme E2 B	0.0	7.92423	0.0335484	5.1133	0.362384	0.313822	0.266188		0.266188	20.9773	8.64823	78.1369	6.12392	24.3012		0.266188	2.99888	0.266188	1.68463	4.51469	5.2865
Mg68260	1676					Minc3s00021g01350	IPR012725 Chaperone DnaK IPR013126 Heat shock protein 70 family IPR029047 Heat shock protein 70kD2C peptide-binding domain superfamily IPR029048 Heat shock protein 70kD2C C-terminal domain superfamily	0.0	CE08631	hsp-6	Heat shock 70 kDa protein F, mitochondrial	0.0	P38646	Homo sapiens	Stress-70 protein, mitochondrial	0.0	7.92314	0.0179326	-5.12548e-15	1	0.266188	0.266188		2.61945	6.18366	4.92288	61.6189	4.69906	13.4054		0.266188	0.266188	0.266188	3.8123	3.80661	2.77634
Mg67132	1512					Minc3s01200g21648	IPR000131 ATP synthase2C F1 complex2C gamma subunit IPR023632 ATP synthase2C F1 complex2C gamma subunit conserved site IPR035968 ATP synthase2C F1 complex2C gamma subunit superfamily	1.93e-89	CE27514			1e-73	Q9M9W1	Arabidopsis thaliana	60S ribosomal protein L22-2	2e-80	7.92291	0.0246079	6.97231	0.0521171	0.266188	0.266188		2.61945	6.18366	3.99154	59.2591	5.64897	12.1235		0.266188	4.36523	0.266188	4.52152	3.09852	3.61306
Mg68045	1008																7.91373	0.0277708	6.97575	0.0550478	0.266188	0.266188		2.61945	6.18366	2.12886	4.98562	3.43253	34.8767		0.266188	4.36523	7.71254	25.0889	35.6704	32.0615
Mg73182	1538												Q58A42	Dictyostelium discoideum	Protein DD3-3	1e-61	7.91255	0.0335056	6.41126	0.131629	0.266188	0.266188		2.61945	6.18366	4.92288	16.7842	3.90748	29.1083		3.10849	0.266188	7.0356	30.0535	36.7325	32.4798
Mg61664	230																7.90102	0.0372461	5.69979	0.228786	0.266188	0.314332		2.61945	18.0186	4.92288	7.34534	8.18204	39.0427		3.10849	1.63253	1.62007	6.64918	0.62023	30.8064
Mg51552	612					Minc3s05951g39082	IPR000266 Ribosomal protein S17/S11 IPR012340 Nucleic acid-binding2C OB-fold IPR019979 Ribosomal protein S172C conserved site IPR028333 Ribosomal protein S172C archaeal/eukaryotic IPR032440 40S ribosomal protein S112C N-terminal	9.97e-77	CE05860	rps-11		7e-61	P41115	Xenopus laevis	40S ribosomal protein S11	6e-71	7.89918	0.0178436	6.10053	0.107155	0.313822	0.266188		2.61945	18.0186	7.71689	68.698	9.60689	16.61		0.266188	5.73157	0.266188	3.10307	7.34703	11.1435
Mg70665	749																7.87668	0.00471994	5.41702	0.142195	0.266188	0.266188		4.9727	3.22492	2.12886	9.70506	3.27421	22.058		0.266188	1.63253	10.4203	15.1598	19.7385	19.9291
Mg72827	1142	SP_NLS															7.87649	0.0161249	6.40519	0.0795892	0.266188	0.266188		4.9727	3.22492	0.266188	14.4245	3.43253	17.8919		1.68734	1.63253	7.0356	20.1244	22.5708	14.072
Mg33692	680		NXFT01004154.1.10812_g		0.0												7.87563	0.000623347	3.25056	0.231587	0.575806	0.362475		47.3314	56.4821	17.0303	7.34534	1.69104	2.18899		0.266188	4.36523	6.35865	4.52152	1.68236	0.266188
Mg70961	774					Minc3s00598g14878	IPR008160 Collagen triple helix repeat IPR021109 Aspartic peptidase domain superfamily	1.12e-14									7.87464	0.0140746	6.39526	0.0706206	0.266188	0.266188		4.9727	3.22492	1.19753	7.34534	1.69104	19.1738		0.266188	2.99888	4.32783	16.5783	10.5334	19.5107
Mg65338	829					Minc3s00098g04481	IPR004790 Isocitrate dehydrogenase NADP-dependent IPR019818 Isocitrate/isopropylmalate dehydrogenase2C conserved site IPR024084 Isopropylmalate dehydrogenase-like domain	5.90e-122	CE15677	idh-2	Isocitrate dehydrogenase [NADP]	8e-130	Q9C1T1	Aspergillus oryzae	ASPOR 3-phytase A	2e-137	7.86998	0.0309187	5.41332	0.241635	0.266188	0.266188		4.9727	3.22492	5.85422	16.7842	4.54075	8.59834		0.266188	1.63253	0.943129	5.93996	0.266188	6.95993
Mg64941	662					Minc3s03064g32628	IPR001197 Ribosomal protein L10e IPR016180 Ribosomal protein L10e/L16 IPR018255 Ribosomal protein L10e2C conserved site IPR036920 Ribosomal protein L10e/L16 superfamily	3.84e-96	CE01543	rpl-10	60S ribosomal protein L10	2e-89	Q54J69	Dictyostelium discoideum	60S ribosomal protein L10	1e-104	7.86958	0.0300218	5.4312	0.231626	0.266188	0.266188		4.9727	3.22492	29.1377	0.266188	2.95758	1.22759		1.68734	0.266188	3.65089	5.23074	1.68236	4.44978
Mg69255	521					Minc3s00109g04813	IPR000194 ATPase2C F1/V1/A1 complex2C alpha/beta subunit2C nucleotide-binding domain IPR003593 AAA+ ATPase domain IPR004100 ATPase2C F1/V1/A1 complex2C alpha/beta subunit2C N-terminal domain IPR005722 ATP synthase2C F1 complex2C beta subunit IPR020003 ATPase2C alpha/beta subunit2C nucleotide-binding domain2C active site IPR024034 ATPase2C F1/V1 complex2C beta/alpha subunit2C C-terminal IPR027417 …	5.67e-103	CE29950	atp-2	ATP synthase subunit beta, mitochondrial	3e-101	Q4FP38	Pelagibacter	PELUB ATP synthase subunit beta	7e-102	7.86663	0.0342044	6.40534	0.0902433	0.266188	0.266188		4.9727	3.22492	2.12886	3.80577	1.21609	3.15039		1.68734	1.63253	0.266188	0.266188	15.136	1.52127
Mg62509	1141					Minc3s01643g25297	IPR004000 Actin family IPR015623 Actin-related protein 3 IPR020902 Actin/actin-like conserved site	7.77e-132	CE25554	arx-1	Actin-related protein 3	3e-129	P53490	Acanthamoeba castellanii	ACACA Actin-related protein 3	5e-142	7.836	0.00493445	-5.12548e-15	1	0.266188	0.266188		7.32596	0.266188	17.9616	36.8418	5.49065	21.417		0.266188	0.266188	9.74336	11.6137	4.16065	8.63337
Mg64896	1030	SP				Minc3s01037g20080	IPR000169 Cysteine peptidase2C cysteine active site IPR000668 Peptidase C1A2C papain C-terminal IPR013201 Cathepsin propeptide inhibitor domain (I29) IPR025660 Cysteine peptidase2C histidine active site IPR025661 Cysteine peptidase2C asparagine active site IPR038765 Papain-like cysteine peptidase superfamily IPR039417 Papain-like cysteine endopeptidase	1.96e-54	CE16333	cpl-1		3e-52	Q9VN93	Drosophila melanogaster	Putative cysteine proteinase CG12163	3e-51	7.82844	0.0292373	5.42771	0.282005	0.266188	0.266188		7.32596	0.266188	23.5496	21.5037	3.90748	14.6872		1.68734	0.266188	8.38948	13.7414	0.266188	7.79665
Mg62678	642					Minc3s00208g07594	IPR001806 Small GTPase IPR005225 Small GTP-binding protein domain IPR027417 P-loop containing nucleoside triphosphate hydrolase	5.50e-103	CE03777	rab-7		5e-104	P36411	Dictyostelium discoideum	Ras-related protein Rab-7A	7e-119	7.81543	0.0330929	6.39354	0.117711	0.266188	0.266188		7.32596	0.266188	7.71689	25.0432	2.32431	12.4439		0.266188	2.99888	2.97395	10.1953	0.266188	4.44978
Mg62503	881								CE04755	cah-3	Putative carbonic anhydrase 3	3e-14	P94170	Nostoc sp. (strain PCC 7120	NOSS1 Carbonic anhydrase	3e-17	7.81224	0.0405563	6.39297	0.131509	0.266188	0.266188		7.32596	0.266188	0.266188	7.34534	1.21609	11.803		0.266188	2.99888	1.62007	12.323	13.3657	7.37829
Mg78465	296																7.80856	0.0485266	6.3923	0.144468	0.266188	0.266188		7.32596	0.266188	1.19753	29.7627	0.582822	9.55974		0.266188	2.99888	0.943129	5.23074	3.45257	4.03142
Mg67164	260																7.80372	0.0349342	5.41295	0.242925	0.266188	0.266188		7.32596	0.266188	15.1676	9.70506	1.37441	5.39367		0.266188	1.63253	0.943129	8.06763	0.62023	6.54157
Mg65166	793					Minc3s00960g19311	IPR004000 Actin family IPR004001 Actin2C conserved site IPR020902 Actin/actin-like conserved site	2.99e-158	CE13150	act-2	Actin-2	1e-157	P53470	Schistosoma mansoni	SCHMA Actin-1	3e-158	7.79612	0.0424734	7.37691	0.0631799	0.266188	0.266188		7.32596	0.266188	5.85422	4.98562	2.79926	2.50946		0.266188	5.73157	1.62007	6.64918	0.974272	7.79665
Mg48153	1190					Minc3s01526g24494	IPR002048 EF-hand domain IPR011992 EF-hand domain pair IPR018247 EF-Hand 12C calcium-binding site IPR039030 Calmodulin	3.60e-99	CE13902	cmd-1	Calmodulin	1e-97	P62155	Xenopus laevis	Calmodulin	4e-97	7.73332	0.0392344	4.14663	0.514175	0.313822	0.266188		0.266188	18.0186	2.12886	29.7627	2.00768	9.88021		1.68734	0.266188	0.266188	0.266188	3.80661	3.1947
Mg50151	320																7.66216	0.0437929	7.08567	0.0728859	0.313822	0.266188		4.9727	12.1011	4.92288	4.98562	0.424505	0.266188		0.266188	11.197	4.32783	3.8123	3.09852	2.77634
Mg36460	316																7.61395	0.0313137	-0.780901	1	0.290005	0.266188		0.266188	12.1011	2.12886	59.2591	5.64897	15.9691		0.266188	0.266188	0.266188	0.97541	6.2849	6.95993
Mg36827	2420					Minc3s00096g04430	IPR002490 V-type ATPase2C V0 complex2C 116kDa subunit family IPR026028 ATPase2C V0 complex2C subunit 116kDa2C eukaryotic	1.41e-172	CE30578	unc-32	Probable V-type proton ATPase 116 kDa subunit a	0.0	Q9M0Y8	Arabidopsis thaliana	Vesicle-fusing ATPase	0.0	7.53841	0.0232844	6.43416	0.0694904	0.313822	0.266188		14.3857	0.266188	23.5496	56.8994	21.164	14.3668		4.52965	2.99888	8.38948	17.2875	1.68236	21.1841
Mg50232	466																7.52068	0.0311569	-1.95152	1	0.361455	0.266188		12.0325	12.1011	9.57957	8.5252	0.266188	2.82993		0.266188	0.266188	4.32783	13.7414	3.80661	3.61306
Mg43933	370																7.52053	0.0268538	6.75157	0.0506827	0.55199	0.266188		23.7988	35.771	10.5109	26.2231	0.899456	6.35507		3.10849	31.6922	17.1897	29.3443	16.1981	14.9088
Mg51769	367					Minc3s05003g37412	IPR000245 V-ATPase proteolipid subunit IPR002379 V-ATPase proteolipid subunit C-like domain IPR011555 V-ATPase proteolipid subunit C2C eukaryotic IPR035921 F/V-ATP synthase subunit C superfamily	4.99e-41	CE06290	vha-2	V-type proton ATPase 16 kDa proteolipid subunit 3	1e-39	P16152	Homo sapiens	Carbonyl reductase [NADPH] 1	1e-40	7.42689	0.0386467	7.08609	0.0574649	0.313822	0.266188		2.61945	12.1011	6.78555	4.98562	1.05777	1.86853		0.266188	11.197	5.00477	9.48607	0.974272	1.93962
Mg66160	1605																7.39415	0.0349072	-5.12548e-15	1	0.266188	0.266188		0.266188	6.18366	5.85422	40.3814	3.90748	4.75273		0.266188	0.266188	0.266188	0.266188	2.39044	1.93962
Mg65576	198																7.39191	0.0499761	6.97941	0.0577538	0.266188	0.266188		0.266188	6.18366	12.3736	16.7842	2.32431	6.0346		1.68734	2.99888	2.29701	7.3584	0.266188	8.63337
Mg68188	1677					Minc3s00072g03575	IPR002194 Chaperonin TCP-12C conserved site IPR002423 Chaperonin Cpn60/TCP-1 family IPR012720 T-complex protein 12C eta subunit IPR017998 Chaperone tailless complex polypeptide 1 (TCP-1) IPR027409 GroEL-like apical domain superfamily IPR027410 TCP-1-like chaperonin intermediate domain superfamily IPR027413 GroEL-like equatorial domain superfamily	0.0	CE28255	cct-7	T-complex protein 1 subunit eta	0.0	Q54ER7	Dictyostelium discoideum	T-complex protein 1 subunit eta	0.0	7.39166	0.0448353	6.39261	0.0905833	0.266188	0.266188		0.266188	6.18366	9.57957	12.0648	8.65699	4.43226		0.266188	2.99888	0.943129	5.93996	0.974272	12.3986
Mg66706	1530					Minc3s02267g29171	IPR008814 Dolichyl-diphosphooligosaccharide--protein glycosyltransferase subunit Swp1	5.55e-23	CE12232	ostd-1	Dolichyl-diphosphooligosaccharide--protein glycosyltransferase subunit 2	4e-35	Q4N3P0	Theileria parva	THEPA 40S ribosomal protein S8	2e-51	7.38899	0.0285872	-5.12548e-15	1	0.266188	0.266188		0.266188	6.18366	7.71689	36.8418	5.17401	7.31647		0.266188	0.266188	0.266188	0.97541	2.0364	4.86814
Mg69910	646												Q5U239	Xenopus laevis	Transmembrane protein 145	4e-13	7.38675	0.0483963	-5.12548e-15	1	0.266188	0.266188		0.266188	6.18366	2.12886	36.8418	3.74916	14.0463		0.266188	0.266188	0.266188	0.266188	4.51469	5.2865
Mg66387	486	SP															7.38635	0.0499761	6.39342	0.0986224	0.266188	0.266188		0.266188	6.18366	7.71689	2.62591	1.84936	2.82993		0.266188	2.99888	5.68171	2.39385	35.6704	1.10291
Mg66197	2314					Minc3s00239g08322	IPR010920 LSM domain superfamily IPR019050 FDF domain IPR025609 Lsm14-like2C N-terminal IPR025761 FFD box	4.68e-21	CE21413	car-1		4e-20	Q5R4R4	Pongo abelii	Protein LSM14 homolog A	3e-18	7.38391	0.0253742	-5.12548e-15	1	0.266188	0.266188		0.266188	6.18366	10.5109	41.5613	4.38243	9.88021		0.266188	0.266188	0.266188	0.266188	3.80661	2.77634
Mg67168	638																7.38346	0.0217021	5.42922	0.163346	0.266188	0.266188		0.266188	6.18366	3.99154	1.44605	2.00768	10.2007		1.68734	0.266188	4.32783	8.06763	14.7819	20.3474
Mg68552	1625												Q6YW51	Oryza sativa	Cytokinin dehydrogenase 6	3e-17	7.38225	0.0231095	-5.12548e-15	1	0.266188	0.266188		0.266188	6.18366	10.5109	26.2231	7.23214	19.1738		0.266188	0.266188	1.62007	3.10307	0.974272	4.03142
Mg66116	1301					Minc3s00272g09108	IPR000533 Tropomyosin	3.61e-53	CE31733	lev-11	Tropomyosin isoforms c\/e	8e-49	Q8WR63	Trichinella pseudospiralis	TRIPS Tropomyosin	7e-54	7.37753	0.0388369	-5.12548e-15	1	0.266188	0.266188		0.266188	6.18366	5.85422	47.4606	5.17401	18.5328		0.266188	0.266188	0.266188	1.68463	1.68236	3.1947
Mg71051	684																7.37261	0.0260785	5.42793	0.186743	0.266188	0.266188		0.266188	6.18366	3.0602	9.70506	3.11589	17.5714		1.68734	0.266188	4.32783	17.2875	17.6142	13.6537
Mg66474	370					Minc3s01060g20314	IPR001063 Ribosomal protein L22/L17 IPR005721 Ribosomal protein L22/L172C eukaryotic/archaeal IPR018260 Ribosomal protein L22/L172C conserved site IPR036394 Ribosomal protein L22/L17 superfamily	2.02e-28	CE22195	rpl-17	60S ribosomal protein L17	1e-25	Q4GXH5	Carabus granulatus	CARGR 60S ribosomal protein L17	3e-28	7.36434	0.0476331	-5.12548e-15	1	0.266188	0.266188		0.266188	6.18366	20.7556	38.0217	6.44055	17.251		0.266188	0.266188	4.32783	10.9045	0.974272	13.2353
Mg66253	2203					Minc3s05531g38377	IPR000629 ATP-dependent RNA helicase DEAD-box2C conserved site IPR001650 Helicase2C C-terminal IPR011545 DEAD/DEAH box helicase domain IPR014001 Helicase superfamily 1/22C ATP-binding domain IPR014014 RNA helicase2C DEAD-box type2C Q motif IPR027417 P-loop containing nucleoside triphosphate hydrolase	1.48e-176	CE01341	inf-1	Eukaryotic initiation factor 4A	0.0	P27639	Caenorhabditis elegans	Eukaryotic initiation factor 4A	0.0	7.36267	0.0253746	6.39699	0.053223	0.266188	0.266188		0.266188	6.18366	17.0303	62.7987	7.54877	20.1352		0.266188	2.99888	0.266188	1.68463	3.80661	2.77634
Mg66772	1322					Minc3s01843g26683	IPR000436 Sushi/SCR/CCP domain IPR035976 Sushi/SCR/CCP superfamily	2.94e-12									7.36212	0.0456076	-5.12548e-15	1	0.266188	0.266188		0.266188	6.18366	9.57957	84.0362	8.49867	10.5211		0.266188	0.266188	0.943129	0.266188	6.63894	1.52127
Mg69662	772																7.36157	0.0448174	5.42672	0.243861	0.266188	0.266188		0.266188	6.18366	3.0602	19.1439	1.84936	15.0077		1.68734	0.266188	9.74336	22.2521	21.8628	21.6025
Mg73498	1632	SP				Minc3s00127g05433	IPR001580 Calreticulin/calnexin IPR009033 Calreticulin/calnexin2C P domain superfamily IPR009169 Calreticulin IPR013320 Concanavalin A-like lectin/glucanase domain superfamily IPR018124 Calreticulin/calnexin2C conserved site	3.54e-144	CE21562	crt-1	Calreticulin	4e-118	P15253	Oryctolagus cuniculus	Calreticulin	4e-138	7.36043	0.0272987	6.42967	0.0595464	0.313822	0.266188		4.9727	9.14239	2.12886	16.7842	2.64094	23.3398		3.10849	4.36523	8.38948	26.5074	42.7512	46.2857
Mg73782	825					Minc3s01682g25559	IPR000504 RNA recognition motif domain IPR002004 Polyadenylate-binding protein/Hyperplastic disc protein IPR006515 Polyadenylate binding protein2C human types 12C 22C 32C 4 IPR012677 Nucleotide-binding alpha-beta plait domain superfamily IPR035979 RNA-binding domain superfamily IPR036053 PABC (PABP) domain	3.71e-99	CE20412	pab-1	Polyadenylate-binding protein	3e-100	Q5R8F7	Pongo abelii	Polyadenylate-binding protein 1	3e-105	7.31878	0.0482343	-5.12548e-15	1	0.266188	0.266188		2.61945	3.22492	1.19753	9.70506	0.899456	11.803		0.266188	0.266188	2.29701	6.64918	5.57682	4.03142
Mg62055	881					Minc3s03796g34840	IPR004000 Actin family IPR020902 Actin/actin-like conserved site	4.77e-124	CE16463	act-5	Actin-5	9e-119	Q54I79	Dictyostelium discoideum	Centractin	4e-132	7.31854	0.0273048	-5.12548e-15	1	0.266188	0.266188		2.61945	3.22492	1.19753	2.62591	1.69104	11.1621		0.266188	0.266188	2.97395	6.64918	9.47128	6.54157
Mg71925	613																7.31831	0.046154	5.41286	0.222701	0.266188	0.266188		2.61945	3.22492	0.266188	4.98562	0.741139	7.31647		0.266188	1.63253	5.68171	9.48607	4.51469	11.9802
Mg70656	1409																7.31699	0.0278181	-5.12548e-15	1	0.266188	0.266188		2.61945	3.22492	1.19753	2.62591	2.00768	34.5562		0.266188	0.266188	0.943129	0.97541	11.2415	4.86814
Mg68645	630																7.31563	0.0156103	5.41602	0.141068	0.266188	0.266188		2.61945	3.22492	2.12886	4.98562	2.32431	20.4556		0.266188	1.63253	5.68171	11.6137	17.9683	17.0006
Mg70378	888	SP_NLS															7.31403	0.0154485	5.42641	0.144805	0.266188	0.266188		2.61945	3.22492	1.19753	4.98562	3.90748	29.4287		1.68734	0.266188	11.7742	17.2875	23.987	28.2962
Mg70135	1319	SP															7.31386	0.041464	-5.12548e-15	1	0.266188	0.266188		2.61945	3.22492	1.19753	12.0648	3.43253	26.224		0.266188	0.266188	7.0356	14.4506	37.7946	25.7861
Mg45103	874		NXFT01001668.1.4311_g		0.0												7.29251	0.0144239	5.8246	0.0509359	0.361455	0.386546		21.4455	18.0186	2.12886	9.70506	0.582822	0.266188		11.6354	2.99888	5.68171	4.52152	0.266188	0.266188
Mg60275	830																7.26611	0.0272133	-5.12548e-15	1	0.266188	0.266188		4.9727	0.266188	2.12886	4.98562	2.79926	25.5831		0.266188	0.266188	5.68171	15.1598	27.8815	23.2759
Mg64008	332																7.26489	0.0435955	5.41699	0.238422	0.266188	0.266188		4.9727	0.266188	7.71689	39.2015	3.59084	15.6486		0.266188	1.63253	8.38948	17.2875	2.0364	14.9088
Mg67550	2330								CE38663	pkd-2	Polycystin-2	7e-88	Q4GZT3	Bos taurus	Polycystin-2	0.0	7.26449	0.027443	5.42717	0.190399	0.266188	0.266188		4.9727	0.266188	5.85422	56.8994	10.3985	27.1854		1.68734	0.266188	0.943129	0.266188	3.45257	2.77634
Mg35446	619					Minc3s00064g03235	IPR000308 14-3-3 protein IPR023409 14-3-3 protein2C conserved site IPR023410 14-3-3 domain IPR036815 14-3-3 domain superfamily	1.42e-72	CE03389	ftt-2	14-3-3-like protein 2	6e-72	P34730	Saccharomyces cerevisiae	Protein BMH2	4e-81	7.26338	0.0481626	6.8763	0.0701894	1.05214	0.266188		44.9781	83.1108	58.0091	144.209	5.80728	21.417		10.2143	86.346	61.1908	94.5927	57.621	35.8267
Mg63913	277		NXFT01000068.1.1585_g	IPR000504 RNA recognition motif domain IPR002130 Cyclophilin-type peptidyl-prolyl cis-trans isomerase domain IPR012677 Nucleotide-binding alpha-beta plait domain superfamily IPR016304 Peptidyl-prolyl cis-trans isomerase E IPR020892 Cyclophilin-type peptidyl-prolyl cis-trans isomerase 2C conserved site IPR024936 Cyclophilin-type peptidyl-prolyl cis-trans isomerase IPR029000 Cyclophilin-like domain…	3.39e-18	Minc3s01361g23134	IPR002130 Cyclophilin-type peptidyl-prolyl cis-trans isomerase domain IPR029000 Cyclophilin-like domain superfamily	1.26e-39	CE20371	cyn-7	Peptidyl-prolyl cis-trans isomerase 7	6e-37	Q5ZMD6	Gallus gallus	Histone H2A.Z	2e-36	7.26079	0.0239581	-5.12548e-15	1	0.266188	0.266188		4.9727	0.266188	15.1676	20.3238	7.23214	25.2626		0.266188	0.266188	7.0356	12.323	0.974272	6.95993
Mg65703	707												O13035	Gallus gallus	Proactivator polypeptide	3e-20	7.25876	0.0263464	6.39545	0.0531991	0.266188	0.266188		4.9727	0.266188	14.2363	21.5037	10.2402	15.0077		0.266188	2.99888	11.0972	5.23074	0.974272	9.47009
Mg66589	287																7.25625	0.0299804	-5.12548e-15	1	0.266188	0.266188		4.9727	0.266188	17.0303	15.6044	3.74916	13.4054		0.266188	0.266188	7.0356	12.323	1.32831	13.6537
Mg63302	923												Q929S8	Listeria innocua	LISIN Argininosuccinate lyase	2e-60	7.25515	0.0341754	-5.12548e-15	1	0.266188	0.266188		4.9727	0.266188	22.6183	16.7842	2.16599	8.27787		0.266188	0.266188	6.35865	15.1598	0.974272	10.7252
Mg59557	1463																7.25341	0.0353191	5.42875	0.208782	0.266188	0.266188		4.9727	0.266188	3.0602	7.34534	1.05777	14.0463		1.68734	0.266188	1.62007	5.93996	23.987	15.3271
Mg65614	374																7.25139	0.0249768	-5.12548e-15	1	0.266188	0.266188		4.9727	0.266188	15.1676	28.5828	1.37441	6.0346		0.266188	0.266188	5.00477	13.0322	1.68236	5.70486
Mg65856	562																7.25109	0.0455138	-5.12548e-15	1	0.266188	0.266188		4.9727	0.266188	0.266188	7.34534	2.00768	12.4439		0.266188	0.266188	4.32783	8.77685	13.3657	20.3474
Mg63482	490					Minc3s00689g16100	IPR001189 Manganese/iron superoxide dismutase IPR019831 Manganese/iron superoxide dismutase2C N-terminal IPR019832 Manganese/iron superoxide dismutase2C C-terminal IPR019833 Manganese/iron superoxide dismutase2C binding site IPR036314 Manganese/iron superoxide dismutase2C C-terminal domain superfamily IPR036324 Manganese/iron superoxide dismutase2C N-terminal domain superfamily	2.45e-20	CE08002	sod-3	Superoxide dismutase [Mn] 2, mitochondrial	4e-19	P31108	Legionella pneumophila	LEGPH Superoxide dismutase [Fe]	1e-56	7.24991	0.0499761	-5.12548e-15	1	0.266188	0.266188		4.9727	0.266188	3.99154	9.70506	14.9897	23.9808		0.266188	0.266188	1.62007	4.52152	0.266188	6.54157
Mg63310	1500																7.24973	0.0400188	-5.12548e-15	1	0.266188	0.266188		4.9727	0.266188	6.78555	7.34534	4.22411	27.1854		0.266188	0.266188	1.62007	13.0322	1.32831	5.2865
Mg64386	1336					Minc3s01430g23744	IPR000719 Protein kinase domain IPR008271 Serine/threonine-protein kinase2C active site IPR011009 Protein kinase-like domain superfamily IPR017441 Protein kinase2C ATP binding site	9.95e-88	CE25046	cmk-1	Calcium\/calmodulin-dependent protein kinase type 1	2e-86	P25323	Dictyostelium discoideum	Myosin light chain kinase A	4e-115	7.24915	0.0324241	6.39365	0.0643263	0.266188	0.266188		4.9727	0.266188	9.57957	17.9641	4.38243	15.0077		0.266188	2.99888	4.32783	10.1953	0.62023	4.44978
Mg60983	640					Minc3s01874g26893	IPR007204 Actin-related protein 2/3 complex subunit 3 IPR036753 Actin-related protein 2/3 complex subunit 3 superfamily	3.04e-51	CE20206	arx-5	Probable actin-related protein 2\/3 complex subunit 3	5e-46	P54822	Mus musculus	Adenylosuccinate lyase	3e-57	7.24814	0.0443029	6.41706	0.0837969	0.266188	0.266188		4.9727	0.266188	7.71689	19.1439	1.84936	12.1235		3.10849	0.266188	4.32783	10.1953	0.974272	8.63337
Mg67677	773	SP															7.24562	0.0367758	6.41755	0.0710779	0.266188	0.266188		4.9727	0.266188	15.1676	12.0648	2.16599	14.0463		3.10849	0.266188	1.62007	5.93996	1.68236	6.95993
Mg63023	421																7.24489	0.0416858	6.39285	0.0802425	0.266188	0.266188		4.9727	0.266188	3.99154	6.16548	3.74916	25.2626		0.266188	2.99888	1.62007	9.48607	0.974272	4.03142
Mg70718	495																7.24398	0.0354947	6.39268	0.0697863	0.266188	0.266188		4.9727	0.266188	1.19753	3.80577	1.53272	9.55974		0.266188	2.99888	2.97395	10.9045	8.05511	15.7455
Mg66156	903					Minc3s02778g31533	IPR000488 Death domain IPR000906 ZU5 domain IPR002110 Ankyrin repeat IPR011029 Death-like domain superfamily IPR020683 Ankyrin repeat-containing domain IPR036770 Ankyrin repeat-containing domain superfamily IPR040745 Ankyrin2C UPA domain	4.01e-23	CE35821			9e-25	P55857	Oryza sativa	Small ubiquitin-related modifier 1	5e-25	7.24364	0.0431457	5.41397	0.222622	0.266188	0.266188		4.9727	0.266188	5.85422	13.2446	2.95758	20.7761		0.266188	1.63253	1.62007	6.64918	0.62023	4.44978
Mg72895	1075					Minc3s00011g00709	IPR007188 Actin-related protein 2/3 complex subunit 2 IPR034666 Arp2/3 complex subunit 2/4	1.96e-52	CE30060	arx-4	Probable actin-related protein 2\/3 complex subunit 2	2e-44	O17570	Caenorhabditis elegans	60S ribosomal protein L38	1e-52	7.24157	0.0342044	5.41365	0.193334	0.266188	0.266188		4.9727	0.266188	2.12886	4.98562	0.741139	8.59834		0.266188	1.63253	5.00477	7.3584	12.3036	10.3068
Mg66488	179		NXFT01002747.1.7216_g	IPR002486 Nematode cuticle collagen 2C N-terminal IPR008160 Collagen triple helix repeat	5.80e-19												7.2406	0.0256246	-5.12548e-15	1	0.266188	0.266188		4.9727	0.266188	15.1676	2.62591	5.49065	5.71413		0.266188	0.266188	3.65089	6.64918	5.57682	7.37829
Mg62997	327																7.2398	0.0268538	-5.12548e-15	1	0.266188	0.266188		4.9727	0.266188	14.2363	12.0648	2.48263	9.88021		0.266188	0.266188	2.29701	5.93996	2.39044	4.03142
Mg68801	1556					Minc3s00602g14961	IPR002423 Chaperonin Cpn60/TCP-1 family IPR012719 T-complex protein 12C gamma subunit IPR027409 GroEL-like apical domain superfamily IPR027410 TCP-1-like chaperonin intermediate domain superfamily IPR027413 GroEL-like equatorial domain superfamily	1.02e-148	CE31540	cct-3	T-complex protein 1 subunit gamma	3e-158	Q3T0K2	Bos taurus	T-complex protein 1 subunit gamma	0.0	7.23502	0.0367341	-5.12548e-15	1	0.266188	0.266188		4.9727	0.266188	2.12886	3.80577	11.1901	8.27787		0.266188	0.266188	0.943129	2.39385	1.68236	11.1435
Mg69438	702																7.23481	0.0483261	-5.12548e-15	1	0.266188	0.266188		4.9727	0.266188	2.12886	20.3238	4.54075	10.2007		0.266188	0.266188	0.266188	0.266188	3.80661	4.44978
Mg65516	264																7.23408	0.0498703	-5.12548e-15	1	0.266188	0.266188		4.9727	0.266188	0.266188	1.44605	17.9977	10.8416		0.266188	0.266188	0.266188	0.266188	1.32831	5.70486
Mg64830	877																7.23368	0.0371173	-5.12548e-15	1	0.266188	0.266188		4.9727	0.266188	11.4422	14.4245	2.00768	2.82993		0.266188	0.266188	2.97395	10.1953	0.62023	2.77634
Mg65289	910																7.2314	0.0386706	6.40531	0.0738597	0.266188	0.266188		4.9727	0.266188	1.19753	0.266188	2.32431	7.95741		1.68734	1.63253	0.943129	5.93996	9.47128	7.79665
Mg64887	836					Minc3s01093g20646	IPR002326 Cytochrome c1 IPR009056 Cytochrome c-like domain IPR021157 Cytochrome c12C transmembrane anchor2C C-terminal IPR036909 Cytochrome c-like domain superfamily	1.72e-55	CE05514	cyc-1		4e-64	Q5E995	Bos taurus	40S ribosomal protein S6	2e-94	7.23054	0.0455138	-5.12548e-15	1	0.266188	0.266188		4.9727	0.266188	13.3049	14.4245	2.79926	1.86853		0.266188	0.266188	2.97395	7.3584	0.266188	1.10291
Mg58781	1752					Minc3s00660g15743	IPR011762 Acetyl-coenzyme A carboxyltransferase2C N-terminal IPR011763 Acetyl-coenzyme A carboxyltransferase2C C-terminal IPR029045 ClpP/crotonase-like domain superfamily IPR034733 Acetyl-CoA carboxylase	7.42e-143	CE00136		Probable methylcrotonoyl-CoA carboxylase beta chain, mitochondrial	2e-150	P25204	Leishmania major	LEIMA 40S ribosomal protein S8	9e-153	7.22976	0.0399012	-5.12548e-15	1	0.266188	0.266188		4.9727	0.266188	7.71689	16.7842	5.0157	3.47086		0.266188	0.266188	1.62007	1.68463	0.974272	4.03142
Mg64078	405																7.22718	0.0455876	-5.12548e-15	1	0.266188	0.266188		4.9727	0.266188	14.2363	2.62591	1.69104	2.18899		0.266188	0.266188	2.97395	4.52152	3.09852	5.2865
Mg46968	484																7.20178	0.0485266	4.39004	0.273914	0.432906	0.266188		12.0325	18.0186	3.0602	13.2446	0.582822	0.266188		1.68734	2.99888	2.97395	3.10307	0.974272	1.10291
Mg72645	666					Minc3s00594g14828	IPR005225 Small GTP-binding protein domain IPR006687 Small GTPase superfamily2C SAR1-type IPR006689 Small GTPase superfamily2C ARF/SAR type IPR027417 P-loop containing nucleoside triphosphate hydrolase	4.20e-56	CE07622	sar-1	GTP-binding protein SAR1	3e-43	Q01475	Schizosaccharomyces pombe	Small COPII coat GTPase sar1	9e-51	7.08961	0.0266155	6.19878	0.0595464	0.290005	0.266188		4.9727	3.22492	0.266188	0.266188	2.16599	9.55974		1.68734	2.99888	1.62007	5.93996	18.3223	4.86814
Mg42253	167																7.04699	0.040574	6.0452	0.0944969	0.337639	0.29026		16.739	0.266188	13.3049	21.5037	0.899456	0.266188		8.7931	0.266188	4.32783	8.77685	1.32831	0.266188
Mg38605	465																7.03338	0.0318476	5.13576	0.166308	0.313822	0.266188		4.9727	6.18366	3.99154	15.6044	0.899456	2.50946		3.10849	0.266188	3.65089	5.23074	7.70107	4.03142
Mg27596	1448					Minc3s01886g26965	IPR000217 Tubulin IPR002452 Alpha tubulin IPR003008 Tubulin/FtsZ2C GTPase domain IPR008280 Tubulin/FtsZ2C C-terminal IPR017975 Tubulin2C conserved site IPR018316 Tubulin/FtsZ2C 2-layer sandwich domain IPR023123 Tubulin2C C-terminal IPR036525 Tubulin/FtsZ2C GTPase domain superfamily IPR037103 Tubulin/FtsZ2C C-terminal domain superfamily	0.0	CE24843	mec-12	Detyrosinated tubulin alpha-3 chain	0.0	P33623	Anemia phyllitidis	ANEPH Tubulin alpha-1 chain	0.0	7.02244	0.0140746	4.71786	0.0692986	1.88573	3.20292		456.798	136.368	139.967	33.3022	18.7893	18.8533		44.3219	76.7816	17.1897	47.0748	5.93086	27.8779
Mg51397	602					Minc3s05003g37412	IPR000245 V-ATPase proteolipid subunit IPR002379 V-ATPase proteolipid subunit C-like domain IPR011555 V-ATPase proteolipid subunit C2C eukaryotic IPR035921 F/V-ATP synthase subunit C superfamily	1.67e-62	CE06290	vha-2	V-type proton ATPase 16 kDa proteolipid subunit 3	9e-42	P62264	Mus musculus	40S ribosomal protein S14	4e-52	6.97092	0.0369146	6.11161	0.0757158	0.313822	0.266188		9.67922	0.266188	35.657	51.0001	7.8654	25.5831		3.10849	2.99888	11.0972	27.2166	2.39044	18.674
Mg45060	731												Q7S8R5	Neurospora crassa	Mitochondrial division protein 1	1e-22	6.96309	0.0133239	5.29444	0.0753502	0.409089	0.266188		4.9727	18.0186	10.5109	30.9425	0.582822	3.15039		0.266188	7.09792	11.0972	8.77685	6.99299	6.95993
Mg34429	2391					Minc3s00175g06781	IPR000573 Aconitase A/isopropylmalate dehydratase small subunit2C swivel domain IPR001030 Aconitase/3-isopropylmalate dehydratase large subunit2C alpha/beta/alpha domain IPR006248 Aconitase2C mitochondrial-like IPR015928 Aconitase/3-isopropylmalate dehydratase2C swivel IPR015931 Aconitase/3-isopropylmalate dehydratase large subunit2C alpha/beta/alpha2C subdomain 1/3 IPR015932 Aconitase2C domain 2…	0.0	CE25005	aco-2	Probable aconitate hydratase, mitochondrial	0.0	Q5ZJ56	Gallus gallus	60S ribosomal protein L7	0.0	6.9448	0.0237046	-2.40781	1	0.409089	0.266188		4.9727	18.0186	26.3436	38.0217	33.3544	26.224		0.266188	0.266188	8.38948	14.4506	2.39044	24.531
Mg45370	350					Minc3s01320g22745	IPR005756 Ribosomal protein L26/L242C eukaryotic/archaeal IPR005824 KOW IPR005825 Ribosomal protein L24/L262C conserved site IPR008991 Translation protein SH3-like domain superfamily IPR014722 Ribosomal protein L22C domain 2 IPR041988 Ribosomal Protein L26/L242C KOW domain	8.24e-29	CE03278	rpl-26	60S ribosomal protein L26	7e-33	P51414	Arabidopsis thaliana	60S ribosomal protein L26-1	5e-44	6.94147	0.0311569	6.11261	0.0690678	0.313822	0.266188		9.67922	0.266188	10.5109	20.3238	6.9155	14.0463		3.10849	2.99888	5.68171	7.3584	0.266188	9.47009
Mg36791	574					Minc3s01376g23269	IPR004911 Gamma interferon inducible lysosomal thiol reductase GILT	3.61e-17	CE25937	pqn-48		5e-20	P42435	Bacillus subtilis	BACSU Nitrite reductase [NAD(P)H]	2e-27	6.9291	0.0219735	5.69563	0.0744578	0.313822	0.266188		9.67922	0.266188	10.5109	10.8849	0.899456	3.47086		1.68734	2.99888	5.00477	9.48607	6.2849	6.12322
Mg17015	522		NXFT01001189.1.3041_g		0.0												6.84276	0.00114934	3.76036	0.0674543	0.409089	0.60319		23.7988	35.771	9.57957	10.8849	0.424505	0.266188		1.68734	5.73157	9.06642	8.77685	1.68236	1.93962
Mg34739	866					Minc3s04154g35616	IPR005788 Disulphide isomerase IPR005792 Protein disulphide isomerase IPR013766 Thioredoxin domain IPR017937 Thioredoxin2C conserved site IPR036249 Thioredoxin-like superfamily	4.99e-14	CE03972	pdi-2	Protein disulfide-isomerase 2	5e-14	Q9FF55	Arabidopsis thaliana	Protein disulfide isomerase-like 1-4	8e-16	6.78494	0.0114857	3.9331	0.210487	0.599623	0.266188		14.3857	26.8948	5.85422	26.2231	0.899456	3.47086		3.10849	2.99888	2.97395	13.0322	11.5955	5.70486
Mg51640	610																6.73178	0.0128697	4.97501	0.0881359	0.409089	0.266188		7.32596	12.1011	12.3736	26.2231	0.582822	1.54806		0.266188	5.73157	7.0356	11.6137	7.34703	4.44978
Mg72744	1115																6.53602	0.0486718	4.63426	0.308682	0.290005	0.266188		2.61945	3.22492	2.12886	6.16548	1.05777	17.251		0.266188	1.63253	5.68171	8.77685	13.7198	10.3068
Mg53043	784																6.52899	0.0445943	-1.28387	1	0.313822	0.266188		7.32596	0.266188	6.78555	28.5828	5.0157	9.23928		0.266188	0.266188	2.29701	5.93996	0.974272	4.44978
Mg41755	622		NXFT01000006.1.1388_g		0.0												6.39659	0.0107448	4.12752	0.116136	0.385272	0.434689		9.67922	18.0186	5.85422	7.34534	3.11589	3.15039		3.10849	2.99888	5.68171	4.52152	1.68236	4.03142
Mg52023	1650					Minc3s03109g32811	IPR002194 Chaperonin TCP-12C conserved site IPR002423 Chaperonin Cpn60/TCP-1 family IPR017998 Chaperone tailless complex polypeptide 1 (TCP-1) IPR027409 GroEL-like apical domain superfamily IPR027410 TCP-1-like chaperonin intermediate domain superfamily IPR027413 GroEL-like equatorial domain superfamily	0.0	CE02985	cct-5	T-complex protein 1 subunit epsilon	0.0	Q54TD3	Dictyostelium discoideum	T-complex protein 1 subunit epsilon	0.0	6.31509	0.0316408	-1.95172	1	0.361455	0.266188		7.32596	3.22492	5.85422	13.2446	14.0398	10.8416		0.266188	0.266188	2.97395	7.3584	0.974272	6.12322
Mg35830	735	SP	NXFT01002319.1.6173_g		0.0	Minc3s00262g08894		3.38e-13									6.20744	0.038881	4.51528	0.153696	0.69489	0.482833		23.7988	26.8948	0.266188	7.34534	1.21609	0.266188		13.0566	2.99888	4.32783	3.10307	0.974272	1.10291
Mg46729	390					Minc3s00715g16462	IPR000552 Ribosomal protein L44e IPR011332 Zinc-binding ribosomal protein	1.52e-49	CE02131	rpl-36.A	Ribosomal protein rpl-36.A	1e-48	Q55CW5	Dictyostelium discoideum	60S ribosomal protein L36a	1e-48	6.11729	0.0230171	3.64467	0.399592	0.409089	0.314332		9.67922	6.18366	3.99154	2.62591	1.05777	0.266188		0.266188	2.99888	5.68171	47.0748	23.2789	77.6626
Mg36929	1204		NXFT01003958.1.941_g		0.0	Minc3s00028g01773		6.68e-15									5.9002	0.0175309	4.11485	0.144649	0.432906	0.386546		4.9727	15.0599	0.266188	7.34534	9.60689	16.2896		0.266188	5.73157	1.62007	2.39385	15.49	19.0923
Mg30196	2354		NXFT01001219.1.3103_g	IPR007012 Poly(A) polymerase 2C central domain IPR014492 Poly(A) polymerase	0.0	Minc3s01884g26951	IPR007012 Poly(A) polymerase2C central domain IPR014492 Poly(A) polymerase	6.33e-65	CE01669			9e-21	Q10295	Schizosaccharomyces pombe	Poly(A) polymerase pla1	2e-15	5.78103	0.000416412	2.3396	0.162231	1.24268	1.18091		61.4509	44.6472	15.1676	4.98562	0.899456	0.907123		3.10849	7.09792	4.32783	7.3584	1.68236	4.44978
Mg11373	377																5.77357	0.0176745	4.04791	0.105414	1.48084	0.458761		52.0379	26.8948	2.12886	17.9641	0.899456	0.907123		15.8989	8.46427	4.32783	5.93996	0.266188	4.03142
Mg34407	483		NXFT01001468.1.3810_g	IPR011701 Major facilitator superfamily IPR020846 Major facilitator superfamily domain IPR036259 MFS transporter superfamily	1.05e-179	Minc3s01180g21456	IPR011701 Major facilitator superfamily IPR020846 Major facilitator superfamily domain IPR036259 MFS transporter superfamily	1.57e-49									5.75429	0.0329817	3.18472	0.323705	0.385272	0.579119		4.9727	20.9773	1.19753	6.16548	3.11589	2.82993		3.10849	1.63253	9.06642	5.93996	4.86873	2.77634
Mg48667	399					Minc3s02527g30457	IPR002784 Ribosomal protein L14e domain IPR008991 Translation protein SH3-like domain superfamily IPR014722 Ribosomal protein L22C domain 2 IPR039660 Ribosomal protein L14 IPR041985 Ribosomal protein L142C KOW motif	3.23e-21	CE19677	rpl-14		1e-14	Q24C27	Tetrahymena thermophila	60S ribosomal protein L14	6e-27	5.7339	0.0447361	4.52154	0.146897	0.599623	0.266188		19.0923	0.266188	8.64823	30.9425	0.582822	0.907123		5.9508	2.99888	5.00477	10.1953	4.16065	6.54157
Mg5043	1129		NXFT01000317.1.8348_g		0.0												5.27259	0.0264207	3.08671	0.18906	4.33886	3.08256		120.282	148.203	1.19753	28.5828	0.741139	0.907123		38.6373	20.7614	5.00477	1.68463	0.266188	2.35798
Mg45875	766		NXFT01000999.1.38_g		0.0	Minc3s00123g05274		1.78e-26									4.84791	0.0384232	3.50265	0.192252	0.480539	0.386546		4.9727	6.18366	7.71689	9.70506	5.33233	5.0732		0.266188	4.36523	11.0972	5.93996	7.34703	8.21501
Mg23552	1744	SP	NXFT01000999.1.30_g	IPR002928 Myosin tail	0.0	Minc3s00371g11156		1.26e-168									4.82533	0.00113334	0.908909	0.799984	0.909241	1.08462		19.0923	23.9361	11.4422	26.2231	3.74916	5.39367		0.266188	2.99888	25.9899	16.5783	8.7632	13.6537
Mg7609	1026	SP	NXFT01002358.1.6287_g	IPR006597 Sel1-like repeat IPR011990 Tetratricopeptide-like helical domain superfamily IPR040239 Beta-lactamase HcpB-like	0.0	Minc3s00028g01773		9.33e-12									4.68404	0.0484934	3.51428	0.175271	0.933058	0.916121		28.5053	6.18366	5.85422	12.0648	2.64094	2.82993		10.2143	5.73157	0.266188	9.48607	5.93086	6.54157
Mg8986	1541					Minc3s00686g16069	IPR000217 Tubulin IPR002453 Beta tubulin IPR003008 Tubulin/FtsZ2C GTPase domain IPR008280 Tubulin/FtsZ2C C-terminal IPR013838 Beta tubulin2C autoregulation binding site IPR017975 Tubulin2C conserved site IPR018316 Tubulin/FtsZ2C 2-layer sandwich domain IPR023123 Tubulin2C C-terminal IPR036525 Tubulin/FtsZ2C GTPase domain superfamily IPR037103 Tubulin/FtsZ2C C-terminal domain superfamily	0.0	CE00850	tbb-4	Tubulin beta-4 chain	0.0	P33188	Paramecium tetraurelia	PARTE Tubulin beta chain	0.0	4.45397	0.0454309	3.03307	0.177718	13.413	1.66234		202.646	115.657	65.4598	49.8203	9.13194	9.88021		42.9008	76.7816	29.3746	66.2238	56.2048	36.2451
Mg20896	1306		NXFT01003662.1.9569_g		0.0	Minc3s00028g01773		1.69e-13									4.43013	0.00647109	2.91741	0.0802425	2.05245	2.2882		47.3314	35.771	3.99154	22.6835	3.59084	2.18899		5.9508	23.4941	7.71254	9.48607	0.974272	0.266188
Mg28833	157																4.42687	0.0439808	3.32192	0.172799	0.790157	0.410618		12.0325	3.22492	22.6183	8.5252	3.11589	2.50946		4.52965	2.99888	7.71254	5.23074	4.86873	2.77634
Mg9463	1059		NXFT01000546.1.1250_g		0.0	Minc3s03303g33468		2.10e-39									4.29412	0.028685	2.22615	0.394091	1.52848	1.06055		33.2118	6.18366	12.3736	7.34534	3024.75	2692.19		4.52965	5.73157	15.1589	35.7273	5095.28	9366.07
Mg27809	1874		NXFT01003141.1.8184_g	IPR003961 Fibronectin type III IPR013783 Immunoglobulin-like fold IPR036116 Fibronectin type III superfamily	0.0	Minc3s01705g25751	IPR003961 Fibronectin type III IPR013783 Immunoglobulin-like fold IPR036116 Fibronectin type III superfamily	0.0	CE42681			4e-85					4.25831	0.000788364	2.002	0.225775	0.76634	1.13277		9.67922	18.0186	11.4422	7.34534	40.3204	46.4135		3.10849	2.99888	7.0356	9.48607	19.3845	8.21501
Mg6416	811		NXFT01004154.1.10810_g		8.06e-19												4.19397	0.0377145	3.84003	0.0650824	8.88786	1.46977		37.9183	145.244	11.4422	4.98562	0.424505	0.907123		84.1142	57.6527	13.1281	15.1598	1.68236	3.61306
Mg20944	1857		NXFT01001468.1.3810_g	IPR011701 Major facilitator superfamily IPR020846 Major facilitator superfamily domain IPR036259 MFS transporter superfamily	0.0	Minc3s01180g21456	IPR011701 Major facilitator superfamily IPR020846 Major facilitator superfamily domain IPR036259 MFS transporter superfamily	0.0	CE18262			1e-67	Q9NRA2	Homo sapiens	Sialin	1e-27	4.10635	0.000235978	1.8657	0.130891	1.88573	1.66234		26.152	26.8948	31.0003	38.0217	23.6971	22.6989		1.68734	9.83061	26.6669	15.8691	28.5895	17.4189
Mg24318	1164		NXFT01000523.1.1205_g	IPR000719 Protein kinase domain IPR011009 Protein kinase-like domain superfamily	0.0	Minc3s07843g41597	IPR000719 Protein kinase domain IPR011009 Protein kinase-like domain superfamily IPR017441 Protein kinase2C ATP binding site	2.42e-89									4.01393	0.00575942	2.12027	0.215944	1.05214	1.06055		14.3857	12.1011	24.481	20.3238	1.21609	2.18899		4.52965	2.99888	15.1589	15.1598	2.39044	2.77634
Mg8821	783		NXFT01001804.1.4651_g		0.0												3.96574	0.0140746	1.77607	0.315822	9.10221	4.83979		103.81	106.781	1.19753	25.0432	0.582822	0.907123		24.4258	22.1277	11.0972	4.52152	2.39044	1.93962
Mg19632	1593					Minc3s01348g23002	IPR000043 Adenosylhomocysteinase-like IPR015878 S-adenosyl-L-homocysteine hydrolase2C NAD binding domain IPR020082 S-adenosyl-L-homocysteine hydrolase2C conserved site IPR034373 Adenosylhomocysteinase IPR036291 NAD(P)-binding domain superfamily	1.93e-172	CE17154	ahcy-1	Adenosylhomocysteinase	2e-168	P93253	Mesembryanthemum crystallinum	MESCR Adenosylhomocysteinase	0.0	3.59955	0.00862741	1.77177	0.242138	10.0787	2.6252		68.5107	80.152	11.4422	14.4245	3.74916	6.67554		15.8989	26.2268	5.68171	15.8691	2.39044	8.63337
Mg4481	740	SP	NXFT01004076.1.10668_g	IPR001841 Zinc finger 2C RING-type IPR013083 Zinc finger 2C RING/FYVE/PHD-type IPR027370 RING-type zinc-finger 2C LisH dimerisation motif	2.48e-63	Minc3s00566g14365	IPR001841 Zinc finger2C RING-type IPR013083 Zinc finger2C RING/FYVE/PHD-type IPR027370 RING-type zinc-finger2C LisH dimerisation motif	5.21e-12									3.55537	0.0078656	1.68087	0.251773	5.79168	5.17679		49.6846	74.2345	5.85422	9.70506	0.266188	0.266188		20.1623	13.9297	0.266188	1.68463	0.266188	0.266188
Mg22384	549					Minc3s02531g30496	IPR000558 Histone H2B IPR007125 Histone H2A/H2B/H3 IPR009072 Histone-fold	5.35e-52	CE05470	his-41	Probable histone H2B 3	8e-49	P08994	Tetrahymena thermophila	TETTH Histone H2B.2	2e-53	3.50881	0.0191221	1.35029	0.518177	3.24328	3.78064		33.2118	41.6885	8.64823	8.5252	1.69104	1.22759		4.52965	12.5633	1.62007	5.23074	2.39044	4.03142
Mg16291	992		NXFT01002554.1.6722_g		0.0	Minc3s00151g06145		6.97e-30									3.43377	0.0198524	-5.62071	0.532668	1.09978	1.03648		16.739	0.266188	11.4422	25.0432	70.7172	71.7304		0.266188	0.266188	14.4819	13.7414	22.5708	17.4189
Mg7384	764		NXFT01002041.1.5298_g	IPR002048 EF-hand domain IPR011992 EF-hand domain pair IPR018247 EF-Hand 1 2C calcium-binding site	1.12e-106												3.4283	0.0464723	2.40946	0.209888	3.19565	3.10663		47.3314	15.0599	1.19753	2.62591	1.53272	0.266188		20.1623	11.197	8.38948	8.77685	4.51469	2.77634
Mg29988	1147		NXFT01004011.1.10459_g	IPR002486 Nematode cuticle collagen 2C N-terminal IPR008160 Collagen triple helix repeat	0.0	Minc3s03801g34855	IPR002486 Nematode cuticle collagen2C N-terminal IPR008160 Collagen triple helix repeat	4.16e-161	CE02272	col-84		6e-17	P12114	Caenorhabditis elegans	Cuticle collagen sqt-1	1e-15	3.3323	0.0367147	-5.79792	0.501081	1.36176	0.988336		7.32596	12.1011	3.99154	0.266188	60.2683	53.4638		0.266188	0.266188	0.266188	1.68463	14.4279	21.1841
Mg8937	1213		NXFT01002717.1.7106_g	IPR002048 EF-hand domain IPR011992 EF-hand domain pair IPR018247 EF-Hand 1 2C calcium-binding site	0.0												3.28392	7.1244e-05	1.88801	0.00829897	21.7965	17.4052		124.989	254.717	49.6271	91.1153	4.85738	8.27787		62.7969	80.8806	28.6977	38.5642	9.11724	12.817
Mg3160	1506		NXFT01002462.1.6524_g	IPR000690 Matrin/U1-C 2C C2H2-type zinc finger IPR003604 Matrin/U1-C-like 2C C2H2-type zinc finger IPR013085 U1-C 2C C2H2-type zinc finger	0.0												3.23805	0.000730661	1.20725	0.242925	11.7221	9.36525		56.7444	139.327	9.57957	15.6044	1.21609	0.907123		28.6892	19.395	10.4203	8.06763	1.68236	4.44978
Mg3288	670		NXFT01001660.1.4281_g		0.0												3.23649	0.0138508	1.53093	0.296897	11.6982	10.4485		117.929	86.0695	5.85422	16.7842	2.16599	0.266188		25.8469	37.1575	17.1897	5.93996	2.39044	3.61306
Mg11062	1433		NXFT01001462.1.3769_g		0.0	Minc3s00028g01773		1.94e-12									2.84845	0.00866006	2.10519	0.0602531	8.29244	8.73938		40.2716	80.152	3.99154	15.6044	0.582822	2.18899		37.2162	34.4248	15.8358	13.7414	4.51469	4.44978
Mg20675	775		NXFT01002509.1.6678_g	IPR008580 PPPDE putative peptidase domain	0.0	Minc3s00721g16515	IPR008580 PPPDE putative peptidase domain	3.43e-130									2.81778	0.0405176	2.34761	0.0929732	1.69519	1.01241		9.67922	6.18366	24.481	12.0648	14.8314	17.251		8.7931	2.99888	13.1281	20.1244	12.3036	15.3271
Mg5178	2041		NXFT01003357.1.8805_g		0.0	Minc3s00593g14814		6.18e-21									2.8055	0.00554253	1.50073	0.176666	8.91167	6.47666		42.6248	62.3996	16.0989	29.7627	1.53272	1.54806		31.5315	11.197	7.71254	15.1598	4.16065	6.54157
Mg4148	1980		NXFT01001691.1.4391_g	IPR001214 SET domain IPR001628 Zinc finger 2C nuclear hormone receptor-type IPR001965 Zinc finger 2C PHD-type IPR003616 Post-SET domain IPR013088 Zinc finger 2C NHR/GATA-type	0.0	Minc3s01521g24457	IPR001214 SET domain IPR001965 Zinc finger2C PHD-type IPR003616 Post-SET domain IPR006560 AWS domain IPR013083 Zinc finger2C RING/FYVE/PHD-type	0.0	CE27781	mes-4	Histone-lysine N-methyltransferase mes-4	3e-18	Q8HXM1	Bos taurus	Cleavage stimulation factor subunit 2	8e-21	2.75244	0.0417224	1.05197	0.646824	2.36206	3.49178		23.7988	12.1011	13.3049	30.9425	62.4848	70.1281		0.266188	11.197	20.5744	17.9967	31.0678	36.2451
Mg17983	1310		NXFT01000810.1.189_g	IPR003492 Batten's disease protein Cln3 IPR036259 MFS transporter superfamily	0.0	Minc3s01198g21634	IPR003492 Batten's disease protein Cln3 IPR018460 Batten's disease protein Cln32C subgroup IPR036259 MFS transporter superfamily	2.21e-140	CE27645	cln-3.3	Battenin	5e-90	Q29611	Canis familiaris	CANFA Battenin	2e-47	2.72124	0.0445575	1.66769	0.296897	2.95748	1.92713		14.3857	15.0599	15.1676	15.6044	7.23214	6.996		5.9508	8.46427	6.35865	20.1244	6.63894	14.4904
Mg10670	642		NXFT01000585.1.1317_g		5.06e-179	Minc3s02312g29391		5.11e-14									2.68936	0.00379387	1.77848	0.0618242	2.93367	2.04749		14.3857	15.0599	5.85422	8.5252	29.5548	27.8264		8.7931	7.09792	13.1281	12.323	37.0866	29.5513
Mg16403	1264		NXFT01001258.1.3197_g		0.0	Minc3s00123g05281		1.01e-20									2.66017	0.0242123	2.13948	0.0855038	3.76725	5.58601		37.9183	18.0186	8.64823	22.6835	4.0658	3.79133		18.7412	20.7614	11.7742	8.77685	4.86873	2.35798
Mg11239	2667		NXFT01000588.1.1326_g	IPR003582 ShKT domain IPR010255 Haem peroxidase superfamily IPR019791 Haem peroxidase 2C animal type IPR037120 Haem peroxidase domain superfamily 2C animal type	0.0	Minc3s00298g09666	IPR003582 ShKT domain IPR010255 Haem peroxidase superfamily IPR019791 Haem peroxidase2C animal-type IPR037120 Haem peroxidase domain superfamily2C animal type	0.0	CE28288	skpo-3		0.0	Q23490	Caenorhabditis elegans	Peroxidase mlt-7	3e-176	2.59798	0.0170904	1.71071	0.179112	1.57611	1.49384		12.0325	3.22492	88.7433	76.957	74.3585	72.6918		7.37195	1.63253	59.16	56.2947	117.454	114.06
Mg2942	1778		NXFT01003741.1.9720_g	IPR002139 Ribokinase/fructokinase IPR011611 Carbohydrate kinase PfkB IPR011877 Ribokinase IPR029056 Ribokinase-like	0.0	Minc3s00040g02313	IPR002139 Ribokinase/fructokinase IPR011611 Carbohydrate kinase PfkB IPR011877 Ribokinase IPR029056 Ribokinase-like	0.0	CE46255		Ribokinase	6e-81	Q8R1Q9	Mus musculus	Ribokinase	2e-53	2.58476	0.000121924	1.85041	0.00283139	6.72053	5.80265		47.3314	23.9361	144.624	92.2952	82.4327	71.7304		28.6892	15.296	146.485	143.529	310.761	288.097
Mg16965	606		NXFT01004183.1.10862_g	IPR002293 Amino acid/polyamine transporter I IPR011021 Arrestin-like 2C N-terminal IPR011022 Arrestin C-terminal-like domain IPR014752 Arrestin 2C C-terminal IPR014756 Immunoglobulin E-set	0.0	Minc3s00826g17813	IPR002293 Amino acid/polyamine transporter I	7.45e-120	CE42501	aat-6		2e-46	Q9HFF2	Schizosaccharomyces pombe	Uncharacterized protein C683.02c	1e-16	2.58051	0.00124325	1.77147	0.0234773	7.91137	6.50073		30.8585	53.5234	21.687	16.7842	12.14	11.1621		27.2681	20.7614	19.8975	19.4152	13.7198	9.88845
Mg16169	1399		NXFT01002049.1.5352_g	IPR013099 Potassium channel domain	0.0	Minc3s01634g25243	IPR003280 Two pore domain potassium channel IPR013099 Potassium channel domain	0.0	CE35702	twk-8		1e-34	O00567	Homo sapiens	Nucleolar protein 56	5e-17	2.5664	0.0498432	2.53085	0.0551348	2.19535	2.16784		16.739	6.18366	13.3049	12.0648	4.69906	8.27787		11.6354	11.197	13.805	7.3584	15.49	13.2353
Mg10543	1170		NXFT01003769.1.9800_g		0.0												2.53056	0.0212411	1.92812	0.0973922	8.81641	4.52686		33.2118	41.6885	9.57957	6.16548	2.32431	0.907123		27.2681	22.1277	8.38948	9.48607	3.80661	4.44978
Mg14485	975		NXFT01004183.1.10862_g	IPR002293 Amino acid/polyamine transporter I IPR011021 Arrestin-like 2C N-terminal IPR011022 Arrestin C-terminal-like domain IPR014752 Arrestin 2C C-terminal IPR014756 Immunoglobulin E-set	0.0	Minc3s00763g17012	IPR002293 Amino acid/polyamine transporter I	2.33e-167	CE42501	aat-6		2e-78	Q59I64	Danio rerio	Y+L amino acid transporter 2	7e-38	2.5245	0.000796868	1.79612	0.0140875	12.3413	10.28		70.8639	56.4821	18.8929	46.2807	18.4726	15.0077		44.3219	33.0585	23.9591	39.9826	20.4466	18.2556
Mg10952	768		NXFT01001352.1.371_g	IPR001507 Zona pellucida domain	0.0	Minc3s04984g37379	IPR001507 Zona pellucida domain	3.28e-65									2.51485	0.00157237	-0.119573	1	2.79077	2.2882		14.3857	12.1011	220.993	130.051	61.2182	50.5796		3.10849	1.63253	127.531	101.685	122.765	94.397
Mg1079	2513		NXFT01000595.1.1386_g	IPR001917 Aminotransferase 2C class-II 2C pyridoxal-phosphate binding site IPR004839 Aminotransferase 2C class I/classII IPR015421 Pyridoxal phosphate-dependent transferase 2C major domain IPR015422 Pyridoxal phosphate-dependent transferase domain 1 IPR015424 Pyridoxal phosphate-dependent transferase	0.0	Minc3s04436g36282	IPR001917 Aminotransferase2C class-II2C pyridoxal-phosphate binding site IPR004839 Aminotransferase2C class I/classII IPR015421 Pyridoxal phosphate-dependent transferase2C major domain IPR015422 Pyridoxal phosphate-dependent transferase domain 1 IPR015424 Pyridoxal phosphate-dependent transferase	0.0	CE07246	sptl-2	Serine palmitoyltransferase 2	0.0	O15270	Homo sapiens	Serine palmitoyltransferase 2	1e-176	2.448	0.00815299	0.376772	0.888338	4.45794	3.58807		26.152	15.0599	31.0003	19.1439	21.0057	14.0463		5.9508	4.36523	17.8666	24.3797	15.844	20.7658
Mg2962	973		NXFT01003643.1.9516_g	IPR006349 2-phosphoglycolate phosphatase 2C eukaryotic IPR006357 HAD-superfamily hydrolase 2C subfamily IIA IPR023214 HAD superfamily IPR036412 HAD-like superfamily	0.0	Minc3s08375g42190	IPR006349 2-phosphoglycolate phosphatase2C eukaryotic IPR006357 HAD-superfamily hydrolase2C subfamily IIA IPR023214 HAD superfamily IPR036412 HAD-like superfamily	0.0	CE16942	pgph-3		5e-107	P34492	Caenorhabditis elegans	Putative NipSnap protein K02D10.1	4e-50	2.41989	0.000303788	1.49283	0.0155989	44.2081	27.106		249.712	127.492	29.1377	26.2231	112.196	116.275		101.168	98.6431	55.0984	31.4719	73.1988	54.2345
Mg2127	829		NXFT01001660.1.4282_g		2.59e-113												2.38727	0.0373828	0.685041	0.724128	11.1505	9.29303		28.5053	77.1933	8.64823	7.34534	2.95758	0.907123		15.8989	16.6623	7.71254	6.64918	4.16065	1.93962
Mg4450	995		NXFT01001395.1.3589_g		1.80e-140												2.32751	0.0185971	1.45364	0.18906	9.88816	6.3563		52.0379	26.8948	15.1676	13.2446	2.32431	4.1118		18.7412	24.8604	10.4203	13.7414	6.63894	3.61306
Mg1608	992		NXFT01001248.1.3179_g		0.0	Minc3s00172g06713	IPR002213 UDP-glucuronosyl/UDP-glucosyltransferase	2.96e-27	CE09154	ugt-44	Putative UDP-glucuronosyltransferase ugt-44	2e-12					2.28748	0.00775472	1.57621	0.0695298	36.7773	21.3047		179.114	100.863	63.5972	36.8418	7.54877	2.82993		95.4834	76.7816	25.9899	41.401	12.6577	9.47009
Mg22454	1013		NXFT01002196.1.5821_g		0.0	Minc3s00827g17823		1.49e-12									2.25279	0.0430222	2.01769	0.0818314	4.74374	4.04543		19.0923	20.9773	10.5109	16.7842	2.48263	2.50946		20.1623	13.9297	14.4819	11.6137	4.51469	5.2865
Mg10613	1929		NXFT01002800.1.7329_g	IPR000719 Protein kinase domain IPR002589 Macro domain IPR008271 Serine/threonine-protein kinase 2C active site IPR011009 Protein kinase-like domain superfamily IPR017441 Protein kinase 2C ATP binding site	0.0	Minc3s00009g00620	IPR002589 Macro domain	0.0					P54678	Dictyostelium discoideum	Calcium-transporting ATPase PAT1	9e-11	2.2435	0.000299568	1.83618	0.00191343	11.1266	9.6541		54.3911	41.6885	30.069	32.1224	16.4145	21.0966		34.3738	38.5239	39.5287	33.5996	22.2168	28.2962
Mg6975	1848		NXFT01003139.1.8169_g	IPR001204 Phosphate transporter	0.0	Minc3s00224g07980	IPR001204 Phosphate transporter	0.0	CE30584	pitr-3	Phosphate transporter	5e-178	Q99288	Saccharomyces cerevisiae	Putative phosphoglycerate mutase DET1	5e-63	2.22905	0.00338743	1.36684	0.0728179	27.1791	13.8666		117.929	71.2758	106.439	91.1153	39.3705	19.1738		54.27	50.821	76.7605	49.9117	34.6083	40.4287
Mg2309	2972		NXFT01004061.1.10349_g	IPR001283 Cysteine-rich secretory protein-related IPR014044 CAP domain IPR035940 CAP superfamily	0.0	Minc3s00205g07534	IPR012337 Ribonuclease H-like superfamily IPR036397 Ribonuclease H superfamily	2.19e-83	CE47068			4e-17					2.20283	2.69786e-05	1.7814	0.000256838	31.5138	25.9024		132.049	130.451	22.6183	23.8634	18.631	15.3282		115.38	80.8806	61.8678	52.0394	25.7572	22.0209
Mg1142	5133		NXFT01001574.1.4109_g	IPR005720 Dihydroorotate dehydrogenase domain IPR009051 Alpha-helical ferredoxin IPR013785 Aldolase-type TIM barrel IPR017896 4Fe-4S ferredoxin-type 2C iron-sulphur binding domain IPR017900 4Fe-4S ferredoxin 2C iron-sulphur binding 2C conserved site IPR023753 FAD/NAD(P)-binding domain IPR028261 Dihydroprymidine dehydrogenase domain II IPR036188 FAD/NAD(P)-binding domain superfamily	0.0	Minc3s00233g08192	IPR005720 Dihydroorotate dehydrogenase domain IPR009051 Alpha-helical ferredoxin IPR013785 Aldolase-type TIM barrel IPR017896 4Fe-4S ferredoxin-type2C iron-sulphur binding domain IPR017900 4Fe-4S ferredoxin2C iron-sulphur binding2C conserved site IPR023753 FAD/NAD(P)-binding domain IPR028261 Dihydroprymidine dehydrogenase domain II IPR036188 FAD/NAD(P)-binding domain superfamily	0.0	CE38489	dpyd-1	Dihydropyrimidine dehydrogenase [NADP(+)]	0.0	P0CQ76	Cryptococcus neoformans	CRYNJ ATP-dependent RNA helicase DBP2-A	0.0	2.16404	1.16937e-05	1.60229	0.000294295	40.1116	40.2972		143.815	216.254	99.9193	93.4751	57.4186	52.1819		126.749	116.406	113.315	93.8834	102.584	78.081
Mg503	2361		NXFT01004158.1.10821_g		0.0	Minc3s05078g37554		1.11e-32									2.16275	0.00469091	1.70194	0.0227813	174.248	141.446		616.82	796.166	140.898	299.95	5.33233	10.5211		513.302	512.646	160.024	147.075	23.2789	32.4798
Mg6079	2069		NXFT01000999.1.24_g	IPR004887 Glutathione synthase 2C substrate-binding domain IPR005615 Glutathione synthase IPR014042 Glutathione synthase 2C alpha-helical IPR014049 Glutathione synthase 2C N-terminal 2C eukaryotic IPR014709 Glutathione synthase 2C C-terminal 2C eukaryotic IPR016185 Pre-ATP-grasp domain superfamily IPR037013 Glutathione synthase 2C substrate-binding domain superfamily	0.0	Minc3s01112g20830	IPR004887 Glutathione synthase2C substrate-binding domain IPR005615 Glutathione synthase IPR014042 Glutathione synthase2C alpha-helical IPR014049 Glutathione synthase2C N-terminal2C eukaryotic IPR014709 Glutathione synthase2C C-terminal2C eukaryotic IPR016185 Pre-ATP-grasp domain superfamily IPR037013 Glutathione synthase2C substrate-binding domain superfamily	0.0	CE18087	gss-1	Glutathione synthetase	1e-85	P51855	Mus musculus	Glutathione synthetase	9e-66	2.15957	7.80807e-05	1.87982	0.000231663	8.05427	10.2559		33.2118	47.6059	75.7046	74.5973	102.697	88.3947		34.3738	31.6922	59.837	57.0039	57.975	53.3978
Mg890	1305		NXFT01002735.1.7146_g		0.0	Minc3s00039g02254		1.20e-26									2.11498	0.000985532	1.70652	0.00670583	32.6094	24.2656		120.282	124.533	37.5197	67.5182	2.79926	3.47086		94.0622	90.4451	59.16	60.55	8.40915	20.3474
Mg3313	2211		NXFT01000260.1.6942_g	IPR000210 BTB/POZ domain IPR010515 Collagenase NC10/endostatin IPR011333 SKP1/BTB/POZ domain superfamily IPR011705 BTB/Kelch-associated IPR012983 PHR IPR016186 C-type lectin-like/link domain superfamily IPR016187 C-type lectin fold IPR038648 PHR domain superfamily	0.0	Minc3s00362g11018	IPR000210 BTB/POZ domain IPR011333 SKP1/BTB/POZ domain superfamily IPR011705 BTB/Kelch-associated IPR012983 PHR IPR038648 PHR domain superfamily	0.0	CE17807	tag-30		9e-34	Q9BX70	Homo sapiens	BTB/POZ domain-containing protein 2	5e-39	2.05531	1.0208e-05	1.40727	0.000563933	54.2588	40.9231		195.587	198.501	95.2626	76.957	35.0959	32.6334		135.276	116.406	69.9911	65.5146	52.6644	60.9283
Mg4499	962		NXFT01002892.1.670_g	IPR000210 BTB/POZ domain IPR003131 Potassium channel tetramerisation-type BTB domain IPR011333 SKP1/BTB/POZ domain superfamily	0.0	Minc3s00603g14984	IPR000210 BTB/POZ domain IPR003131 Potassium channel tetramerisation-type BTB domain IPR011333 SKP1/BTB/POZ domain superfamily	0.0	CE42889			3e-14	A6NMZ7	Homo sapiens	Collagen alpha-6(VI) chain	2e-63	-2.00746	0.0249939	0.11479	1	22.9636	19.9808		4.9727	6.18366	9.57957	8.5252	21.639	18.8533		21.5835	24.8604	21.9283	17.9967	28.2355	24.531
Mg3855	3605		NXFT01004241.1.11010_g	IPR001054 Adenylyl cyclase class-3/4/guanylyl cyclase IPR018297 Adenylyl cyclase class-4/guanylyl cyclase 2C conserved site IPR029787 Nucleotide cyclase	0.0	Minc3s00370g11150	IPR001054 Adenylyl cyclase class-3/4/guanylyl cyclase IPR018297 Adenylyl cyclase class-4/guanylyl cyclase2C conserved site IPR029787 Nucleotide cyclase	0.0	CE24798	acy-2		6e-146	Q9VW60	Drosophila melanogaster	Adenylate cyclase type 2	2e-78	-2.02021	0.0400232	-1.11641	0.278871	50.8292	55.6308		14.3857	12.1011	2.12886	4.98562	3.27421	1.54806		27.2681	22.1277	11.0972	20.1244	6.99299	12.817
Mg1903	1598		NXFT01000014.1.3579_g	IPR002227 Tyrosinase copper-binding domain IPR008922 Uncharacterised domain 2C di-copper centre	0.0	Minc3s00008g00504	IPR002227 Tyrosinase copper-binding domain IPR008922 Uncharacterised domain2C di-copper centre	0.0	CE39838	tyr-5		4e-127	Q19673	Caenorhabditis elegans	Putative tyrosinase-like protein tyr-3	3e-95	-2.02275	0.00541282	-1.17626	0.0791012	121.303	92.5325		26.152	26.8948	32.863	10.8849	77.3666	64.6801		34.3738	60.3854	42.2365	39.9826	93.0252	108.203
Mg1025	1830	SP	NXFT01000225.1.5996_g	IPR000742 EGF-like domain IPR002919 Trypsin Inhibitor-like 2C cysteine rich domain IPR036084 Serine protease inhibitor-like superfamily	0.0	Minc3s00433g12235	IPR002110 Ankyrin repeat IPR020683 Ankyrin repeat-containing domain IPR036770 Ankyrin repeat-containing domain superfamily	3.98e-37	CE07702			2e-11					-2.02535	0.00508765	-1.44845	0.0326753	129.305	117.784		28.5053	32.8123	14.2363	33.3022	18.9476	14.0463		37.2162	53.5537	44.2673	21.5428	41.6891	36.6634
Mg7641	378		NXFT01001904.1.4886_g		7.55e-46												-2.02927	0.00439585	-0.428765	0.650264	94.7235	87.2849		23.7988	20.9773	55.2151	20.3238	25.7552	19.8147		57.1123	78.1479	46.2982	59.8408	46.9997	44.6123
Mg324	2282		NXFT01001967.1.5083_g	IPR013078 Histidine phosphatase superfamily 2C clade-1 IPR029033 Histidine phosphatase superfamily	0.0	Minc3s03017g32444	IPR013078 Histidine phosphatase superfamily2C clade-1 IPR029033 Histidine phosphatase superfamily	8.48e-154	CE29367			2e-14					-2.02966	0.0259567	-0.548343	0.670006	79.0997	52.0201		12.0325	20.9773	1.19753	0.266188	0.582822	0.907123		48.5854	41.2566	16.5128	18.7059	2.39044	5.70486
Mg1907	1903		NXFT01003378.1.8859_g	IPR000719 Protein kinase domain IPR011009 Protein kinase-like domain superfamily	0.0	Minc3s01040g20102	IPR000719 Protein kinase domain IPR011009 Protein kinase-like domain superfamily	7.23e-162	CE19223	strd-1	STE20-related kinase adapter protein strd-1	4e-25	Q13435	Homo sapiens	Splicing factor 3B subunit 2	3e-29	-2.0329	0.00133835	-1.45098	0.0116506	118.636	87.6942		21.4455	29.8535	11.4422	20.3238	17.2061	24.6217		38.6373	37.1575	42.2365	36.4365	27.5274	27.4595
Mg982	817					Minc3s00294g09597		1.09e-28									-2.03909	0.000591294	-1.64867	0.00292329	213.379	153.482		44.9781	44.6472	21.687	19.1439	1.53272	0.907123		51.4277	65.8508	43.5904	54.8763	21.8628	12.3986
Mg2464	2527		NXFT01003219.1.8406_g		0.0	Minc3s03644g34402		1.04e-109									-2.03986	0.0233381	-0.316293	0.808408	19.4149	24.4822		4.9727	6.18366	14.2363	22.6835	23.2221	27.1854		17.32	18.0287	23.2822	28.6351	26.1113	25.3677
Mg531	2927		NXFT01000059.1.1321_g	IPR001680 WD40 repeat IPR011990 Tetratricopeptide-like helical domain superfamily IPR015943 WD40/YVTN repeat-like-containing domain superfamily IPR017986 WD40-repeat-containing domain IPR036322 WD40-repeat-containing domain superfamily	0.0	Minc3s00247g08487	IPR001680 WD40 repeat IPR011990 Tetratricopeptide-like helical domain superfamily IPR015943 WD40/YVTN repeat-like-containing domain superfamily IPR017986 WD40-repeat-containing domain IPR036322 WD40-repeat-containing domain superfamily	0.0	CE38757	adpr-1		2e-28	Q27874	Caenorhabditis elegans	Integrin beta pat-3	3e-37	-2.0417	0.0119488	-0.0697723	1	28.3223	26.1431		7.32596	6.18366	24.481	28.5828	26.3885	20.4556		20.1623	31.6922	29.3746	36.4365	28.9436	24.531
Mg20	1197		NXFT01001951.1.5038_g	IPR001130 TatD family IPR001304 C-type lectin-like IPR016186 C-type lectin-like/link domain superfamily IPR016187 C-type lectin fold IPR018378 C-type lectin 2C conserved site IPR032466 Metal-dependent hydrolase	0.0	Minc3s00272g09117	IPR001304 C-type lectin-like IPR016186 C-type lectin-like/link domain superfamily IPR016187 C-type lectin fold IPR018378 C-type lectin2C conserved site	1.40e-15									-2.04594	0.0384947	-1.70843	0.0928704	2391.85	2084.86		339.135	748.826	84.0866	131.231	6.44055	6.0346		578.675	791.381	308.274	484.665	84.5282	160.916
Mg6475	1611		NXFT01002910.1.7479_g	IPR007000 Phospholipase B-like	0.0	Minc3s01627g25204	IPR007000 Phospholipase B-like	0.0	CE27290		Putative phospholipase B-like 3	0.0	Q9BL07	Caenorhabditis elegans	Putative phospholipase B-like 3	0.0	-2.04972	0.0498723	-1.79912	0.0525553	19.7007	24.4581		4.9727	6.18366	22.6183	16.7842	77.6832	59.5527		4.52965	8.46427	19.8975	32.8904	31.0678	69.7138
Mg2658	2824		NXFT01002785.1.7296_g	IPR000873 AMP-dependent synthetase/ligase IPR020845 AMP-binding 2C conserved site IPR025110 AMP-binding enzyme 2C C-terminal domain	0.0	Minc3s00649g15615	IPR000873 AMP-dependent synthetase/ligase IPR020845 AMP-binding2C conserved site IPR025110 AMP-binding enzyme2C C-terminal domain IPR042099 AMP-dependent synthetase-like superfamily	0.0	CE20812	acs-1	long-chain-fatty-acid-CoA ligase	0.0	P27604	Caenorhabditis elegans	Adenosylhomocysteinase	9e-170	-2.04988	0.00495647	-1.11565	0.0902433	72.8359	45.5448		19.0923	9.14239	30.069	17.9641	32.2462	28.7878		28.6892	26.2268	44.2673	46.3656	47.7078	37.0818
Mg9357	629		NXFT01003282.1.8545_g		0.0	Minc3s00697g16236		1.62e-46									-2.05043	0.0445233	-0.446747	0.754774	21.5822	22.6768		4.9727	6.18366	7.71689	12.0648	6.9155	7.31647		17.32	15.296	20.5744	17.9967	19.3845	17.0006
Mg2295	1911		NXFT01000435.1.1011_g	IPR010655 Pre-mRNA cleavage complex subunit Clp1 2C C-terminal IPR027417 P-loop containing nucleoside triphosphate hydrolase IPR032319 Polyribonucleotide 5'-hydroxyl-kinase Clp1 2C P-loop domain IPR032324 Clp1 2C N-terminal beta-sandwich domain IPR038238 Clp1 2C C-terminal domain superfamily	0.0	Minc3s05766g38804	IPR010655 Pre-mRNA cleavage complex subunit Clp12C C-terminal IPR027417 P-loop containing nucleoside triphosphate hydrolase IPR032319 Polyribonucleotide 5'-hydroxyl-kinase Clp12C P-loop domain IPR032324 Clp12C N-terminal beta-sandwich domain IPR038238 Clp12C C-terminal domain superfamily IPR038239 Clp12C N-terminal beta-sandwich domain superfamily	0.0	CE17941	clpf-1	Protein clpf-1	1e-115	A8PB32	Brugia malayi	BRUMA Protein CLP1 homolog	1e-140	-2.05301	0.0302153	-0.142261	1	27.1791	26.9375		9.67922	3.22492	21.687	20.3238	18.7893	16.9305		17.32	31.6922	19.2205	22.9613	15.844	19.0923
Mg3309	2297	SP	NXFT01004013.1.10471_g	IPR002048 EF-hand domain IPR011992 EF-hand domain pair IPR018247 EF-Hand 1 2C calcium-binding site	0.0	Minc3s07736g41480	IPR002048 EF-hand domain IPR011992 EF-hand domain pair IPR018247 EF-Hand 12C calcium-binding site	2.39e-70	CE05943			2e-52	Q66KI9	Xenopus tropicalis	Putative methyltransferase NSUN4	1e-24	-2.0549	0.0100687	-0.853958	0.265821	48.9	47.3743		19.0923	3.22492	31.9317	41.5613	39.2122	35.1971		27.2681	26.2268	32.7593	27.2166	29.6517	30.8064
Mg5832	1426		NXFT01001563.1.4067_g	IPR002108 Actin-depolymerising factor homology domain IPR028458 Twinfilin IPR029006 ADF-H/Gelsolin-like domain superfamily	0.0	Minc3s02806g31635	IPR002108 Actin-depolymerising factor homology domain IPR028458 Twinfilin IPR029006 ADF-H/Gelsolin-like domain superfamily	1.82e-160	CE28307	twf-2		3e-69	Q56JV6	Bos taurus	Twinfilin-1	1e-36	-2.0615	0.0337717	0.127155	1	21.2964	22.5805		7.32596	3.22492	8.64823	14.4245	20.6891	20.4556		23.0046	24.8604	23.2822	23.6705	18.6764	14.072
Mg55	3207		NXFT01004292.1.11197_g	IPR001757 P-type ATPase IPR004014 Cation-transporting P-type ATPase 2C N-terminal IPR006068 Cation-transporting P-type ATPase 2C C-terminal IPR008250 P-type ATPase 2C A domain superfamily IPR018303 P-type ATPase 2C phosphorylation site IPR023298 P-type ATPase 2C transmembrane domain superfamily IPR023299 P-type ATPase 2C cytoplasmic domain N IPR036412 HAD-like superfamily	0.0	Minc3s02059g28023	IPR001757 P-type ATPase IPR006068 Cation-transporting P-type ATPase2C C-terminal IPR023298 P-type ATPase2C transmembrane domain superfamily IPR023299 P-type ATPase2C cytoplasmic domain N IPR036412 HAD-like superfamily	0.0	CE07721	eat-6	Sodium\/potassium-transporting ATPase subunit alpha	0.0	P41779	Caenorhabditis elegans	Homeobox protein ceh-20	0.0	-2.06254	0.00110836	-1.11479	0.045131	113.42	92.5566		30.8585	18.0186	20.7556	26.2231	25.9135	14.3668		51.4277	43.9893	44.2673	48.4933	55.8508	56.3263
Mg1186	1799		NXFT01003229.1.740_g		0.0	Minc3s00871g18293		6.17e-63									-2.06821	4.86552e-05	-0.715464	0.10179	920.236	922.954		157.934	284.305	93.4	127.691	37.629	30.7106		504.775	617.855	314.367	370.48	227.561	189.365
Mg2740	2505		NXFT01000848.1.2131_g	IPR000990 Innexin	0.0	Minc3s00239g08312	IPR000990 Innexin	5.66e-123	CE06279	unc-7	Innexin unc-7	7e-107	Q03412	Caenorhabditis elegans	Innexin unc-7	1e-105	-2.07186	0.00668035	-0.976622	0.19265	54.8542	77.6804		16.739	15.0599	17.9616	8.5252	4.85738	5.0732		40.0585	27.5931	23.2822	25.7982	10.8874	13.6537
Mg1696	4012		NXFT01003761.1.9768_g	IPR001849 Pleckstrin homology domain IPR011993 PH-like domain superfamily IPR022164 Kinesin-like IPR027640 Kinesin-like protein	0.0	Minc3s00091g04276	IPR000253 Forkhead-associated (FHA) domain IPR001752 Kinesin motor domain IPR008984 SMAD/FHA domain superfamily IPR019821 Kinesin motor domain2C conserved site IPR022140 Kinesin-like KIF1-type IPR027417 P-loop containing nucleoside triphosphate hydrolase IPR027640 Kinesin-like protein IPR032405 Kinesin-associated IPR036961 Kinesin motor domain superfamily	0.0	CE47855	unc-104	Kinesin-like protein unc-104	0.0	P23678	Caenorhabditis elegans	Kinesin-like protein unc-104	0.0	-2.07763	0.00691609	-1.43958	0.0436164	67.5009	80.6653		9.67922	26.8948	12.3736	21.5037	8.18204	6.996		30.1104	24.8604	29.3746	39.9826	14.7819	17.0006
Mg58	3531		NXFT01000704.1.1678_g	IPR000719 Protein kinase domain IPR008271 Serine/threonine-protein kinase 2C active site IPR011009 Protein kinase-like domain superfamily IPR017441 Protein kinase 2C ATP binding site	0.0	Minc3s00321g10145	IPR000719 Protein kinase domain IPR008271 Serine/threonine-protein kinase2C active site IPR011009 Protein kinase-like domain superfamily IPR017441 Protein kinase2C ATP binding site	0.0	CE40646	sad-1	Serine\/threonine kinase SAD-1	0.0	Q19469	Caenorhabditis elegans	Serine/threonine kinase SAD-1	0.0	-2.07983	0.0191878	-1.20223	0.173348	57.6884	74.4067		19.0923	12.1011	4.92288	10.8849	8.81531	9.55974		30.1104	27.5931	17.1897	31.4719	8.7632	19.0923
Mg5434	5821		NXFT01002579.1.6809_g	IPR007889 DNA binding HTH domain 2C Psq-type IPR009057 Homeobox-like domain superfamily	0.0	Minc3s00157g06326	IPR000242 PTP type protein phosphatase IPR000387 Tyrosine specific protein phosphatases domain IPR003595 Protein-tyrosine phosphatase2C catalytic IPR029021 Protein-tyrosine phosphatase-like	0.0	CE00998	egg-3	Protein tyrosine phosphatase-like protein egg-3	3e-56					-2.08655	0.00493445	-0.954699	0.167902	50.4957	73.7086		12.0325	18.0186	12.3736	12.0648	38.5789	38.7223		21.5835	42.6229	35.4671	26.5074	20.8006	27.0412
Mg10124	823		NXFT01000875.1.2192_g	IPR000997 Cholinesterase IPR002018 Carboxylesterase 2C type B IPR019826 Carboxylesterase type B 2C active site IPR029058 Alpha/Beta hydrolase fold	0.0	Minc3s03296g33446	IPR000997 Cholinesterase IPR002018 Carboxylesterase2C type B IPR019826 Carboxylesterase type B2C active site IPR029058 Alpha/Beta hydrolase fold	2.68e-129	CE28131	ace-3	Carboxylic ester hydrolase	3e-67	Q9NDG8	Caenorhabditis briggsae	CAEBR Acetylcholinesterase 4	5e-59	-2.09179	0.0298403	-0.761968	0.508632	44.5892	55.5827		14.3857	9.14239	4.92288	14.4245	9.29026	7.31647		37.2162	22.1277	28.6977	25.0889	10.1794	19.5107
Mg797	2149		NXFT01001061.1.2778_g	IPR000960 Flavin monooxygenase FMO IPR001567 Peptidase M3A/M3B catalytic domain IPR002253 Flavin monooxygenase (FMO) 1 IPR020946 Flavin monooxygenase-like IPR024077 Neurolysin/Thimet oligopeptidase 2C domain 2 IPR036188 FAD/NAD(P)-binding domain superfamily	0.0	Minc3s00881g18446	IPR000960 Flavin monooxygenase FMO IPR002253 Flavin monooxygenase (FMO) 1 IPR020946 Flavin monooxygenase-like IPR036188 FAD/NAD(P)-binding domain superfamily	0.0	CE06138	fmo-2	Dimethylaniline monooxygenase [N-oxide-forming]	4e-164	Q8K4B0	Mus musculus	Metastasis-associated protein MTA1	8e-151	-2.09216	0.00484883	-1.17017	0.0898611	100.463	82.3743		14.3857	29.8535	22.6183	8.5252	16.2562	18.2124		47.1642	34.4248	34.7902	41.401	27.1734	24.9494
Mg975	1337		NXFT01000071.1.1688_g	IPR001303 Class II aldolase/adducin N-terminal IPR036409 Class II aldolase/adducin N-terminal domain superfamily	0.0	Minc3s00022g01398	IPR001303 Class II aldolase/adducin N-terminal IPR036409 Class II aldolase/adducin N-terminal domain superfamily	2.57e-35	CE34553	add-1	Adducin-related protein 1	6e-18	Q20952	Caenorhabditis elegans	Adducin-related protein 2	1e-15	-2.09276	9.76185e-05	0.230876	0.711973	81.267	98.2134		21.4455	20.9773	45.9017	27.4029	302.652	259.204		94.0622	116.406	97.0687	95.3019	687.462	603.54
Mg591	4759		NXFT01000084.1.2106_g	IPR027417 P-loop containing nucleoside triphosphate hydrolase	0.0	Minc3s03175g33041	IPR001680 WD40 repeat IPR015943 WD40/YVTN repeat-like-containing domain superfamily IPR017986 WD40-repeat-containing domain IPR036322 WD40-repeat-containing domain superfamily	0.0	CE36361	qui-1		6e-179	Q22799	Caenorhabditis elegans	Dynein light chain 1, cytoplasmic	1e-18	-2.09605	0.00033694	-1.754	0.00130303	170.461	224.998		61.4509	29.8535	48.6958	58.0793	36.9957	32.6334		59.9546	57.6527	63.2217	87.5004	44.1674	59.6732
Mg1088	4452		NXFT01001705.1.440_g	IPR003020 Bicarbonate transporter 2C eukaryotic IPR011531 Bicarbonate transporter 2C C-terminal IPR016152 Phosphotransferase/anion transporter	0.0	Minc3s03246g33277	IPR003020 Bicarbonate transporter2C eukaryotic IPR011531 Bicarbonate transporter2C C-terminal IPR016152 Phosphotransferase/anion transporter	0.0	CE28476	abts-3		0.0	P51824	Solanum tuberosum	SOLTU ADP-ribosylation factor 1	8e-137	-2.10153	0.00572329	-1.28666	0.0728009	98.7009	105.772		21.4455	26.8948	8.64823	1.44605	7.8654	6.35507		41.4796	42.6229	20.5744	22.9613	9.47128	12.817
Mg2527	558		NXFT01001026.1.2657_g		0.0	Minc3s00994g19674		5.42e-66									-2.11138	0.000628078	-1.53287	0.00626731	166.626	199.146		37.9183	47.6059	7.71689	7.34534	18.156	10.8416		44.3219	82.247	72.6988	53.4578	28.5895	27.0412
Mg866	2467		NXFT01002947.1.7724_g	IPR017905 ERV/ALR sulfhydryl oxidase domain IPR036774 ERV/ALR sulfhydryl oxidase domain superfamily IPR039798 Sulfhydryl oxidase	0.0	Minc3s00651g15639	IPR013766 Thioredoxin domain IPR017905 ERV/ALR sulfhydryl oxidase domain IPR036249 Thioredoxin-like superfamily IPR036774 ERV/ALR sulfhydryl oxidase domain superfamily IPR039798 Sulfhydryl oxidase	0.0	CE05808		Sulfhydryl oxidase	4e-148	O08841	Cavia porcellus	CAVPO Sulfhydryl oxidase 1	8e-29	-2.11444	0.00132166	-1.40345	0.0153209	81.6957	77.6563		19.0923	18.0186	29.1377	28.5828	36.6791	20.7761		34.3738	26.2268	30.7285	40.6918	34.2542	40.4287
Mg5304	798		NXFT01004033.1.10548_g	IPR001534 Transthyretin-like IPR038479 Transthyretin-like superfamily	0.0	Minc3s03522g34082	IPR001534 Transthyretin-like IPR038479 Transthyretin-like superfamily	2.86e-82	CE47093	ttr-36		3e-38	Q22285	Caenorhabditis elegans	Transthyretin-like protein 46	1e-29	-2.1164	0.00767027	-1.83138	0.0147155	73.8124	75.9472		14.3857	20.9773	12.3736	3.80577	29.0799	40.0041		25.8469	16.6623	19.2205	22.9613	31.4219	47.5408
[truncated: 249 more rows]

## Sheet: 4dpi vs 2dpi common
M. graminicola transcript	Length	SP & NLS prediction	Best blastn hit			Best blastx hit											LogFC (Nip4 versus Nip2)	FDR (Padj)	LogFC (Tog4 versus Tog2)	FDR (Padj)	normalised CPM value
[truncated: 84 more rows]

[truncated: 5 more sheets: 4dpi vs 2dpi R, 4dpi vs 2dpi S, 8dpi vs 4 dpi common, 8dpi vs 4 dpi R, 8dpi vs 4dpi S]
