# Supplementary material for: Analyses of the Root-Knot Nematode (Meloidogyne graminicola) Transcriptome during Host Infection Highlight Specific Gene Expression Profiling in Resistant Rice Plants
Source: Pathogens. 2020 Aug 8;9(8):644. doi: 10.3390/pathogens9080644 (PMC7460394; doi:10.3390/pathogens9080644)
Supplement: Supplementary file 1 [file pathogens-09-00644-s001.zip › Table S3.xlsx]

## Sheet: Tog2 vs Nip2
M. graminicola transcript	Length	SP & NLS prediction	Best blastn hit			Best blastx hit											edgeR						normalised CPM value
			M. graminicola			M. incognita			C. elegans				Uniprot				LogFC (Tog2 vs Nip2)	FDR (Padj)	LogFC (Tog4 vs Nip4)	FDR (Padj)	LogFC (Tog8 vs Nip8)	FDR (Padj)	pre-J2			in Nipponbare (S)							in TOG5681 (R )
			CDS	Fonction	e-value	Protein	Fonction	e-value	Protein	Class	Fonction	e-value	Protein	Species	Fonction	e-value							J2A	J2B		Nip2A	Nip2B	Nip4A	Nip4B	Nip8A	Nip8B		Tog2A	Tog2B	Tog4A	Tog4B	Tog8A	Tog8B
Mg6633	1362		NXFT01000737.1.1776_g	IPR001128 Cytochrome P450 IPR002401 Cytochrome P450 2C E-class 2C group I IPR017972 Cytochrome P450 2C conserved site IPR036396 Cytochrome P450 superfamily	0.0	Minc3s01018g19904	IPR001128 Cytochrome P450 IPR002401 Cytochrome P4502C E-class2C group I IPR017972 Cytochrome P4502C conserved site IPR036396 Cytochrome P450 superfamily	0.0	CE31452	cyp-33E1	Cytochrome P450 family	3e-71	P00179	Oryctolagus cuniculus	Cytochrome P450 2C5	4e-50	10.71	0.01	3.08	0	-0.07	1	56.3	85.6		0.3	0.3	4	2.6	46.3	36.8		24.4	31.7	26.7	26.5	39.2	40
Mg5485	1802		NXFT01002568.1.6770_g	IPR006073 GTP binding domain IPR016496 GTPase HflX IPR025121 GTPase HflX 2C N-terminal IPR027417 P-loop containing nucleoside triphosphate hydrolase IPR030394 HflX-type guanine nucleotide-binding (G) domain	0.0	Minc3s01971g27515	IPR006073 GTP binding domain IPR016496 GTPase HflX IPR025121 GTPase HflX2C N-terminal IPR027417 P-loop containing nucleoside triphosphate hydrolase IPR030394 HflX-type guanine nucleotide-binding (G) domain IPR042108 GTPase HflX2C N-terminal domain superfamily	0.0	CE05870			9e-83	Q6DCC6	Xenopus laevis	Putative GTP-binding protein 6	8e-65	10.6	0.04	0	1	-0.35	0.96	16.18	15.07		0.27	0.27	14.24	14.42	17.68	11.48		31.53	20.76	19.9	8.78	12.3	10.73
Mg7183	2260		NXFT01003497.1.9128_g	IPR001128 Cytochrome P450 IPR036396 Cytochrome P450 superfamily	1.70e-49	Minc3s01331g22844	IPR001128 Cytochrome P450 IPR002401 Cytochrome P4502C E-class2C group I IPR017972 Cytochrome P4502C conserved site IPR036396 Cytochrome P450 superfamily	0.0	CE15822	cyp-13A11	Cytochrome P450 family	2e-80	Q27520	Caenorhabditis elegans	Putative cytochrome P450 CYP13A1	9e-73	10.51	0.03	0.09	1	0.56	0.77	28.2	34.93		0.27	0.27	18.89	22.68	10.72	13.41		14.48	34.42	23.96	20.12	16.55	18.67
Mg292	302																10.43	0.02	2.13	0.02	1.34	0.03	265.6	236		0.3	0.3	5.9	3.8	9.1	10.5		15.9	30.3	21.9	19.4	20.1	28.7
Mg15071	2935		NXFT01001626.1.4216_g	IPR002656 Acyltransferase 3 IPR016021 MIF4G-like domain superfamily IPR016024 Armadillo-type fold	0.0	Minc3s04592g36613	IPR002656 Acyltransferase 3	0.0	CE43410	oac-46	O-ACyltransferase homolog	1e-160	Q09225	Caenorhabditis elegans	Nose resistant to fluoxetine protein 6	5e-25	9.97	0.04	0.46	0.79	-2.22	0.01	9.48	9.08		0.27	0.27	5.85	7.35	65.97	55.71		17.32	16.66	9.07	8.78	16.55	9.89
Mg4182	3931		NXFT01002921.1.7652_g	IPR002404 IRS-type PTB domain IPR011993 PH-like domain superfamily	0.0	Minc3s01765g26143	IPR002404 IRS-type PTB domain IPR011993 PH-like domain superfamily	0.0	CE37098	ist-1	Insulin receptor SubsTrate homolog	3e-23					4.7	0.03	0.71	0.72	-0.02	1	29.85	28.74		2.62	0.27	22.62	14.42	27.81	22.7		41.48	27.59	36.82	23.67	23.63	26.2
Mg1167	1344		NXFT01001189.1.3042_g		0.0												4.58	0.03	3.09	0	3.58	0	61.9	68.1		2.6	3.2	5.9	9.7	6.1	2.8		48.6	78.1	89.6	36.4	61.5	44.6
Mg571	449		NXFT01003863.1.10048_g	IPR002068 Alpha crystallin/Hsp20 domain IPR008978 HSP20-like chaperone	1.52e-43	Minc3s00326g10279	IPR002068 Alpha crystallin/Hsp20 domain IPR008978 HSP20-like chaperone	2.02e-26									2.62	0.03	1.1	0.15	0.51	0.68	344.49	492.63		23.8	6.18	59.87	39.2	227.77	210.81		92.64	98.64	124.15	88.21	292	330.77
Mg31070	1743		NXFT01001208.1.261_g		0.0	Minc3s01603g25042		0.0	CE15698	tag-297	Temporarily Assigned Gene name	0.0					2.46	0.03	2.97	0	-2.42	0	4.3	3.4		7.3	12.1	2.1	6.2	317.1	318.5		54.3	48.1	28	30.8	61.2	57.6
Mg975	1337		NXFT01000071.1.1688_g	IPR001303 Class II aldolase/adducin N-terminal IPR036409 Class II aldolase/adducin N-terminal domain superfamily	0.0	Minc3s00022g01398	IPR001303 Class II aldolase/adducin N-terminal IPR036409 Class II aldolase/adducin N-terminal domain superfamily	2.57e-35	CE34553	add-1	Adducin-related protein 1	6e-18	Q20952	Caenorhabditis elegans	Adducin-related protein 2	1e-15	2.32	0	1.38	0	1.2	0	81.27	98.21		21.45	20.98	45.9	27.4	302.65	259.2		94.06	116.41	97.07	95.3	687.46	603.54
Mg851	574		NXFT01003643.1.9514_g		2.79e-156												2.25	0.01	3.42	0	3.35	0	202.8	207.9		45	26.9	17	18	18.5	14		176.5	168.3	235.2	132.9	181.2	148.8
Mg449	693	SP	NXFT01001170.1.319_g	IPR008965 CBM2/CBM3 2C carbohydrate-binding domain superfamily	0.0												2.17	0.03	3.69	0	2.99	0	764	714		68.5	89	11.4	23.9	7.9	5.1		304.4	397.9	181.7	257.7	42	60.5
Mg8272	3874		NXFT01003033.1.7965_g	IPR000536 Nuclear hormone receptor 2C ligand-binding domain IPR001628 Zinc finger 2C nuclear hormone receptor-type IPR013088 Zinc finger 2C NHR/GATA-type IPR035500 Nuclear hormone receptor-like domain superfamily	0.0	Minc3s01031g20025	IPR000536 Nuclear hormone receptor2C ligand-binding domain IPR001628 Zinc finger2C nuclear hormone receptor-type IPR013088 Zinc finger2C NHR/GATA-type IPR035500 Nuclear hormone receptor-like domain superfamily	0.0	CE37054	nhr-41	Nuclear Hormone Receptor family	1e-36	P55059	Humicola insolens	Protein disulfide-isomerase	2e-35	-2.72	0.04	0.35	0.8	-1.47	0.03	10.05	10.5		26.15	29.85	12.37	10.88	52.83	52.18		4.53	4.37	15.16	14.45	17.97	20.35

## Sheet: Tog4 vs Nip4
M. graminicola transcript	Length	SP & NLS prediction	Best blastn hit			Best blastx hit											edgeR						normalised CPM value
			M. graminicola			M. incognita			C. elegans				Uniprot				LogFC (Tog2 vs Nip2)	FDR (Padj)	LogFC (Tog4 vs Nip4)	FDR (Padj)	LogFC (Tog8 vs Nip8)	FDR (Padj)	pre-J2			in Nipponbare (S)							in TOG5681 (R )
			CDS	Fonction	e-value	Protein	Fonction	e-value	Protein	Class	Fonction	e-value	Protein	Species	Fonction	e-value							J2A	J2B		Nip2A	Nip2B	Nip4A	Nip4B	Nip8A	Nip8B		Tog2A	Tog2B	Tog4A	Tog4B	Tog8A	Tog8B
Mg764	445																2.24	0.05	11.29	0	4.37	0	473.1	358.4		12	9.1	0.3	0.3	0.7	0.3		45.7	53.6	42.2	41.4	6.6	7.4
Mg4958	409		NXFT01002858.1.7503_g	IPR008597 Invertebrate-type lysozyme IPR023346 Lysozyme-like domain superfamily	2.81e-80	Minc3s00831g17873	IPR008597 Invertebrate-type lysozyme IPR023346 Lysozyme-like domain superfamily	1.28e-46	CE17549	ilys-2	Invertebrate-type lysozyme 2	4e-28	Q6L6Q5	Ostrea edulis	Lysozyme	4e-23	6.4	0.92	11.12	0.01	9	0	13.4	10.6		0.3	0.3	0.3	0.3	0.3	0.3		0.3	3	34.8	40	10.2	7.4
Mg12111	337		NXFT01001828.1.4703_g	IPR009009 RlpA-like protein 2C double-psi beta-barrel domain IPR036908 RlpA-like domain superfamily	2.10e-140	Minc3s03843g34959	IPR009009 RlpA-like protein2C double-psi beta-barrel domain IPR036908 RlpA-like domain superfamily	4.59e-40									6.99	0.89	10.48	0.05	8.89	0.02	10.7	4.1		0.3	0.3	0.3	0.3	0.3	0.3		3.1	1.6	11.8	36.4	8.1	8.2
Mg2759	586		NXFT01001335.1.321_g		7.11e-53												2.53	0.1	10.47	0	2.76	0.04	52.6	23.4		19.1	9.1	0.3	0.3	0.6	0.9		71.3	93.2	21.9	25.8	3.8	2.8
Mg123	1089		NXFT01002324.1.6197_g		0.0	Minc3s03733g34637	IPR000608 Ubiquitin-conjugating enzyme E2 IPR016135 Ubiquitin-conjugating enzyme/RWD-like	1.22e-177	CE47666	ubc-17	Probable ubiquitin-conjugating enzyme protein 17	2e-38	P48322	Caenorhabditis elegans	Uncharacterized protein C36E8.1	1e-29	-0.03	1	9.68	0	1.3	0.44	26.8	26.8		19.1	32.8	0.3	0.3	2.5	3.5		20.2	30.3	9.7	18	5.9	7.8
Mg4564	1239		NXFT01001971.1.5096_g	IPR001107 Band 7 domain IPR001972 Stomatin family IPR018080 Band 7/stomatin-like 2C conserved site IPR036013 Band 7/SPFH domain superfamily	0.0	Minc3s02554g30616	IPR001107 Band 7 domain IPR001972 Stomatin family IPR018080 Band 7/stomatin-like2C conserved site IPR036013 Band 7/SPFH domain superfamily	0.0	CE48073			7e-133	Q21190	Caenorhabditis elegans	Protein unc-1	1e-88	-0.18	1	9.39	0.01	0.05	1	15.8	18.9		16.7	12.1	0.3	0.3	4.7	4.8		15.9	9.8	7.7	15.2	4.5	5.3
Mg5627	310		NXFT01003364.1.8817_g	IPR000971 Globin IPR009050 Globin-like superfamily IPR012085 Globin 2C nematode IPR012292 Globin/Protoglobin	3.27e-128	Minc3s01010g19833	IPR000971 Globin IPR009050 Globin-like superfamily IPR012085 Globin2C nematode IPR012292 Globin/Protoglobin	2.47e-51	CE36418	glb-1	Globin-like protein	5e-34	P30627	Caenorhabditis elegans	Globin-like protein	8e-33	0.84	1	9.24	0.04	1.35	0.68	31.1	23.4		0.3	6.2	0.3	0.3	7.2	2.8		4.5	5.7	11.1	9.5	13.4	12
Mg1777	2529		NXFT01003761.1.9762_g	IPR017452 GPCR 2C rhodopsin-like 2C 7TM IPR019427 7TM GPCR 2C serpentine receptor class w (Srw)	0.0	Minc3s00240g08353	IPR017452 GPCR2C rhodopsin-like2C 7TM IPR019427 7TM GPCR2C serpentine receptor class w (Srw)	0.0	CE16663	dmsr-6	DroMyoSuppressin Receptor related	5e-57					2.52	0.43	9.13	0.02	0.65	0.89	35.1	38		2.6	6.2	0.3	0.3	3.1	1.5		18.7	27.6	10.4	8.8	2	5.3
Mg2908	701		NXFT01002370.1.6301_g	IPR005804 Fatty acid desaturase domain	0.0	Minc3s00550g14142		4.84e-37									2.31	0.38	9.13	0.01	0.93	0.75	83.7	47.6		5	3.2	0.3	0.3	1.1	1.5		14.5	24.9	12.5	6.6	2.4	1.9
Mg3270	972		NXFT01002640.1.6970_g	IPR000580 TSC-22 / Dip / Bun IPR002350 Kazal domain IPR004156 Organic anion transporter polypeptide IPR020846 Major facilitator superfamily domain IPR036058 Kazal domain superfamily IPR036259 MFS transporter superfamily	0.0	Minc3s01710g25784	IPR002350 Kazal domain IPR004156 Organic anion transporter polypeptide IPR020846 Major facilitator superfamily domain IPR036058 Kazal domain superfamily IPR036259 MFS transporter superfamily	5.86e-158	CE28397		Solute carrier organic anion transporter family member	9e-86	P0DJ24	Tetrahymena thermophila	60S ribosomal protein L37	6e-21	-0.16	1	9.09	0.02	-1.56	0.38	29.1	19.5		9.7	6.2	0.3	0.3	12.1	13.1		7.4	7.1	7.7	10.9	5.2	3.6
Mg6697	2295		NXFT01004234.1.10994_g	IPR004709 Na+/H+ exchanger IPR006153 Cation/H+ exchanger IPR018422 Cation/H+ exchanger 2C CPA1 family	0.0	Minc3s00012g00781	IPR004709 Na+/H+ exchanger IPR006153 Cation/H+ exchanger IPR018422 Cation/H+ exchanger2C CPA1 family	0.0	CE32044	nhx-3	Probable Na(+)\/H(+) antiporter nhx-3	0.0	O16452	Caenorhabditis elegans	Probable Na(+)/H(+) antiporter nhx-3	0.0	1.07	0.92	9.02	0.02	-2.65	0.04	16.2	19.1		7.3	12.1	0.3	0.3	23.7	23.7		24.4	15.3	9.7	8.1	5.9	1.9
Mg12071	1436		NXFT01000113.1.2971_g	IPR002225 3-beta hydroxysteroid dehydrogenase/isomerase IPR036291 NAD(P)-binding domain superfamily	0.0	Minc3s03875g35043	IPR002225 3-beta hydroxysteroid dehydrogenase/isomerase IPR036291 NAD(P)-binding domain superfamily	0.0	CE20185	hsd-1	HydroxySteroid Dehydrogenase homolog	8e-47	O42706	Schizosaccharomyces pombe	60S ribosomal protein L21-B	7e-56	0.28	1	8.97	0.01	-2.81	0.01	13.9	11.7		5	12.1	0.3	0.3	46.2	43.8		11.6	8.5	8.4	8.8	5.9	7.4
Mg5072	1508		NXFT01002913.1.7633_g	IPR000834 Peptidase M14 2C carboxypeptidase A IPR003146 Carboxypeptidase 2C activation peptide IPR003582 ShKT domain IPR034223 Insect gut carboxypeptidase-like 2C carboxypeptidase domain IPR036990 Metallocarboxypeptidase-like 2C propeptide	0.0	Minc3s01462g24025	IPR000834 Peptidase M142C carboxypeptidase A IPR003146 Carboxypeptidase2C activation peptide IPR003582 ShKT domain IPR034223 Insect gut carboxypeptidase-like2C carboxypeptidase domain IPR036990 Metallocarboxypeptidase-like2C propeptide	0.0	CE37044			0.0	P04069	Astacus fluviatilis	Carboxypeptidase B	6e-74	0.36	1	8.95	0.02	0.51	0.93	9.7	9.9		14.4	12.1	0.3	0.3	11.5	8.3		20.2	13.9	12.5	4.5	14.4	13.7
Mg11784	666		NXFT01002230.1.5929_g	IPR000859 CUB domain IPR000884 Thrombospondin type-1 (TSP1) repeat IPR001506 Peptidase M12A IPR006026 Peptidase 2C metallopeptidase IPR017050 Metallopeptidase 2C nematode IPR024079 Metallopeptidase 2C catalytic domain superfamily IPR035914 Spermadhesin 2C CUB domain superfamily IPR036383 Thrombospondin type-1 (TSP1) repeat superfamily	0.0	Minc3s00004g00264	IPR000859 CUB domain IPR000884 Thrombospondin type-1 (TSP1) repeat IPR001506 Peptidase M12A IPR006026 Peptidase2C metallopeptidase IPR013032 EGF-like2C conserved site IPR017050 Metallopeptidase2C nematode IPR024079 Metallopeptidase2C catalytic domain superfamily IPR034035 Astacin-like metallopeptidase domain IPR035914 Spermadhesin2C CUB domain superfamily IPR036383 Thrombospondin type-1 (TSP1) re…	9.56e-93	CE27200	dpy-31	Zinc metalloproteinase dpy-31	6e-52	P98060	Caenorhabditis elegans	Zinc metalloproteinase dpy-31	7e-51	2.1	0.88	8.55	0.04	-1.89	0.24	6.8	5.1		2.6	0.3	0.3	0.3	28.8	39		6	5.7	7	5.9	8.4	10.3
Mg39794	1114		NXFT01004154.1.10809_g	IPR040282 Abnormal cell migration protein 18-like	0.0	Minc3s00719g16506	IPR040282 Abnormal cell migration protein 18-like	2.39e-173	CE20208			2e-93					7.4	0.8	7.97	0.05	-0.57	0.81	1.1	0.7		0.3	0.3	0.3	0.3	49.8	47.7		3.1	3	4.3	4.5	28.6	37.1
Mg692	1885		NXFT01001263.1.270_g	IPR002018 Carboxylesterase 2C type B IPR029058 Alpha/Beta hydrolase fold	0.0	Minc3s05606g38512	IPR002018 Carboxylesterase2C type B IPR019826 Carboxylesterase type B2C active site IPR029058 Alpha/Beta hydrolase fold	0.0	CE07569	ace-1	Acetylcholinesterase 1	8e-41	P37967	Bacillus subtilis	Para-nitrobenzyl esterase	2e-47	1.61	0.84	5.52	0.01	5.43	0	187.8	139.7		7.3	0.3	0.3	1.4	0.3	0.6		13.1	11.2	17.2	32.9	4.9	6.5
Mg11937	835	SP	NXFT01002136.1.5657_g	IPR001283 Cysteine-rich secretory protein-related IPR014044 CAP domain IPR035940 CAP superfamily	1.17e-141	Minc3s01051g20218	IPR001283 Cysteine-rich secretory protein-related IPR002413 Venom allergen 5-like IPR014044 CAP domain IPR018244 Allergen V5/Tpx-1-related2C conserved site IPR035940 CAP superfamily	8.25e-82	CE44291	vap-2	Venom-Allergen-like Protein	6e-20	Q16937	Ancylostoma	Ancylostoma secreted protein	2e-18	1.38	0.98	5.03	0.02	5.86	0	4.4	3.2		0.3	3.2	3.1	0.3	1.7	0.3		3.1	4.4	43.6	57.7	37.8	63.4
Mg324	2282		NXFT01001967.1.5083_g	IPR013078 Histidine phosphatase superfamily 2C clade-1 IPR029033 Histidine phosphatase superfamily	0.0	Minc3s03017g32444	IPR013078 Histidine phosphatase superfamily2C clade-1 IPR029033 Histidine phosphatase superfamily	8.48e-154	CE29367			2e-14					1.48	0.49	5.02	0	3.05	0.02	79.1	52		12	21	1.2	0.3	0.6	0.9		48.6	41.3	16.5	18.7	2.4	5.7
Mg4099	1347		NXFT01001761.1.4539_g	IPR000008 C2 domain IPR001565 Synaptotagmin IPR015428 Synaptotagmin 1/2 IPR035892 C2 domain superfamily	0.0	Minc3s00942g19131	IPR000008 C2 domain IPR001565 Synaptotagmin IPR035892 C2 domain superfamily	0.0	CE37915	snt-2	Synaptotagmin 2	4e-101	Q5R4J5	Pongo abelii	Synaptotagmin-1	9e-74	-0.28	1	4.91	0.02	0.36	1	9.8	8.5		30.9	23.9	1.2	0.3	4.1	1.9		28.7	16.7	16.5	15.9	4.9	2.8
Mg143	1645		NXFT01000379.1.9902_g	IPR001547 Glycoside hydrolase 2C family 5 IPR017853 Glycoside hydrolase superfamily	0.0	Minc3s00202g07474	IPR001547 Glycoside hydrolase2C family 5 IPR017853 Glycoside hydrolase superfamily IPR018087 Glycoside hydrolase2C family 52C conserved site	4.16e-168					P22541	Butyrivibrio fibrisolvens	Endoglucanase A	9e-35	1.26	0.78	4.81	0.01	1.33	0.45	202.9	169.8		14.4	12.1	2.1	0.3	2.6	1.5		23	39.9	17.9	41.4	7	3.2
Mg95	693		NXFT01000888.1.2240_g	IPR002701 Chorismate mutase II 2C prokaryotic-type IPR019425 7TM GPCR 2C serpentine receptor class t (Srt) IPR036263 Chorismate mutase type II superfamily	0.0	Minc3s01325g22793	IPR002701 Chorismate mutase II2C prokaryotic-type IPR036263 Chorismate mutase type II superfamily	2.42e-74									0.65	0.97	4.73	0.04	3.5	0.03	717.2	588.1		42.6	23.9	2.1	7.3	6.8	2.5		37.2	68.6	64.6	161.3	43.5	63
Mg3770	503																2.3	0.43	4.68	0.02	1.18	0.71	135.5	101		7.3	18	0.3	5	1.5	3.5		51.4	67.2	47.7	62.7	7	2.8
Mg631	557		NXFT01000805.1.2060_g		1.19e-15												-0.42	1	4.65	0.05	4.14	0.01	573.7	511.7		21.4	23.9	3.1	0.3	2	0.6		14.5	19.4	23.3	55.6	14.8	29.1
Mg961	4140		NXFT01001718.1.4419_g	IPR001148 Alpha carbonic anhydrase domain IPR018338 Carbonic anhydrase 2C alpha-class 2C conserved site IPR023561 Carbonic anhydrase 2C alpha-class IPR036398 Alpha carbonic anhydrase domain superfamily	0.0	Minc3s00314g09984	IPR001148 Alpha carbonic anhydrase domain IPR018338 Carbonic anhydrase2C alpha-class2C conserved site IPR023561 Carbonic anhydrase2C alpha-class IPR036398 Alpha carbonic anhydrase domain superfamily	0.0	CE04755	cah-3	Putative carbonic anhydrase 3	5e-68	Q27504	Caenorhabditis elegans	Putative carbonic anhydrase 3	8e-67	0.91	0.88	4.55	0	0.08	1	86.6	96.1		16.7	9.1	0.3	2.6	35.4	20.8		25.8	23.5	20.6	30.1	31.1	28.7
Mg295	349		NXFT01000699.1.1659_g	IPR000175 Sodium:neurotransmitter symporter IPR037272 Sodium:neurotransmitter symporter superfamily	3.81e-108												1.75	0.6	4.54	0	5.84	0	297.8	327		14.4	3.2	4	5	1.8	0.3		24.4	37.2	90.3	105.2	57.3	58.8
Mg506	402		NXFT01002106.1.5431_g		4.33e-123												2.34	0.27	4.35	0	5.06	0	195.9	150.3		9.7	6.2	4	0.3	0.9	0.3		40.1	39.9	34.1	50.6	11.6	17.4
Mg255	413		NXFT01002290.1.6077_g	IPR008597 Invertebrate-type lysozyme	2.98e-45												1.02	0.84	4.08	0.02	5.93	0	1479.5	1488.6		61.5	127.5	12.4	15.6	3.6	0.6		166.5	210.7	188.5	273.3	117.8	147.1
Mg920	826					Minc3s04771g36974	IPR009009 RlpA-like protein2C double-psi beta-barrel domain IPR036908 RlpA-like domain superfamily	1.57e-68									1.28	0.68	4.05	0.01	4.91	0	123.2	122.8		12	15.1	2.1	0.3	0.6	0.3		27.3	37.2	19.2	15.9	4.2	9.9
Mg133	4100		NXFT01002871.1.7527_g	IPR006028 Gamma-aminobutyric acid A receptor/Glycine receptor alpha IPR006029 Neurotransmitter-gated ion-channel transmembrane domain IPR006201 Neurotransmitter-gated ion-channel IPR036719 Neurotransmitter-gated ion-channel transmembrane domain superfamily	0.0	Minc3s00782g17286	IPR006028 Gamma-aminobutyric acid A receptor/Glycine receptor alpha IPR006029 Neurotransmitter-gated ion-channel transmembrane domain IPR006201 Neurotransmitter-gated ion-channel IPR006202 Neurotransmitter-gated ion-channel ligand-binding domain IPR018000 Neurotransmitter-gated ion-channel2C conserved site IPR036719 Neurotransmitter-gated ion-channel transmembrane domain superfamily IPR036734 Neu…	0.0	CE29908	lgc-46	Probable ligand-gated ion channel 46	1e-118	P41849	Caenorhabditis elegans	Ligand-gated ion channel 50	1e-53	0.59	0.94	3.99	0.01	3.57	0.01	1977.5	1452		61.5	118.6	18.9	22.7	7.5	6.4		94.1	172.4	209.4	442.1	70	91.5
Mg1857	1066		NXFT01001222.1.3114_g	IPR017853 Glycoside hydrolase superfamily	0.0	Minc3s05621g38543	IPR001547 Glycoside hydrolase2C family 5 IPR017853 Glycoside hydrolase superfamily	1.71e-71					P10475	Bacillus subtilis	Endoglucanase	2e-20	2	0.51	3.98	0.03	3.56	0.02	632.6	572.5		28.5	15.1	7.7	12.1	4.2	0.9		50	126	120.8	179	29.7	32.9
Mg1117	357		NXFT01002795.1.7320_g	IPR002347 Short-chain dehydrogenase/reductase SDR IPR020904 Short-chain dehydrogenase/reductase 2C conserved site IPR036291 NAD(P)-binding domain superfamily	2.99e-114												0.38	1	3.83	0	2.84	0	331.1	319		14.4	9.1	2.1	1.4	2.2	1.2		10.2	20.8	14.5	30.8	12.3	10.3
Mg693	1938		NXFT01004135.1.985_g	IPR001139 Glycoside hydrolase family 30 IPR001286 Glycoside hydrolase 2C family 59 IPR017853 Glycoside hydrolase superfamily	0.0	Minc3s03089g32729	IPR001139 Glycoside hydrolase family 30 IPR013780 Glycosyl hydrolase2C all-beta IPR017853 Glycoside hydrolase superfamily IPR033452 Glycosyl hydrolase family 302C beta sandwich domain IPR033453 Glycosyl hydrolase family 302C TIM-barrel domain	2.96e-79	CE26698	gba-3	Putative glucosylceramidase 3	4e-14	Q45070	Bacillus subtilis	Glucuronoxylanase xynC	2e-41	1.14	0.5	3.8	0	4.08	0	315.2	202.9		416.8	381.9	29.1	66.3	3.4	3.8		907	855.6	539.8	768.4	39.9	73.5
Mg711	422	SP	NXFT01000945.1.2477_g	IPR001534 Transthyretin-like IPR038479 Transthyretin-like superfamily	7.16e-166	Minc3s03739g34653	IPR001534 Transthyretin-like IPR038479 Transthyretin-like superfamily	1.28e-63	CE39742	ttr-45	TransThyretin-Related family domain	9e-38	Q22285	Caenorhabditis elegans	Transthyretin-like protein 46	8e-34	0.14	1	3.77	0.01	-0.09	1	167.5	151.9		5	18	2.1	0.3	20.1	17.9		8.8	15.3	11.8	17.3	18.3	17.4
Mg822	1153		NXFT01003966.1.954_g	IPR036908 RlpA-like domain superfamily	0.0	Minc3s00578g14542		2.89e-18									1.59	0.47	3.73	0.03	2.15	0.12	686	381.9		285	334.6	14.2	12.1	9.8	3.5		813.2	1053.7	151.2	193.9	18.7	42.1
Mg2060	2247		NXFT01002396.1.6539_g	IPR000743 Glycoside hydrolase 2C family 28 IPR003961 Fibronectin type III IPR006626 Parallel beta-helix repeat IPR011050 Pectin lyase fold/virulence factor IPR012334 Pectin lyase fold IPR013783 Immunoglobulin-like fold IPR036116 Fibronectin type III superfamily	0.0	Minc3s00861g18203	IPR000743 Glycoside hydrolase2C family 28 IPR003961 Fibronectin type III IPR011050 Pectin lyase fold/virulence factor IPR012334 Pectin lyase fold IPR013783 Immunoglobulin-like fold IPR036116 Fibronectin type III superfamily	7.18e-178					P15922	Erwinia	Exo-poly-alpha-D-galacturonosidase	8e-93	1.12	0.69	3.72	0.02	3.96	0.01	179.9	91.2		136.8	177.8	4	14.4	1.2	0.9		310.1	373.3	86.9	140	9.5	17.8
Mg449	693	SP	NXFT01001170.1.319_g	IPR008965 CBM2/CBM3 2C carbohydrate-binding domain superfamily	0.0												2.17	0.03	3.69	0	2.99	0	764	714		68.5	89	11.4	23.9	7.9	5.1		304.4	397.9	181.7	257.7	42	60.5
Mg923	1045		NXFT01001057.1.2761_g	IPR036908 RlpA-like domain superfamily	0.0	Minc3s02154g28582	IPR036908 RlpA-like domain superfamily	2.68e-27									1.14	0.75	3.68	0.02	4.39	0.01	600.5	389.6		99.1	192.6	15.2	10.9	1.7	0.9		283.1	355.5	121.4	210.2	13.7	35.4
Mg4841	441		NXFT01004283.1.11150_g	IPR001606 ARID DNA-binding domain IPR021906 SWI/SNF-like complex subunit BAF250/Osa IPR033388 SWI/SNF-like complex subunit BAF250 2C C-terminal IPR036431 ARID DNA-binding domain superfamily	5.55e-18												1.66	0.16	3.5	0	4.25	0	300.7	251.5		54.4	35.8	5.9	5	1.2	0.3		129.6	157.4	65.3	53.5	9.1	15.3
Mg2142	1080		NXFT01003181.1.8287_g		9.07e-144	Minc3s02358g29651		2.20e-57									0.44	0.96	3.48	0	1.74	0.04	137.9	95.9		33.2	35.8	4.9	2.6	1.7	3.8		35.8	57.7	38.2	43.5	7	9.1
Mg394	373		NXFT01000573.1.1298_g	IPR019383 Golgin subfamily A member 7/ERF4 IPR039735 Cysteine-rich hydrophobic domain-containing protein 1/2	2.41e-120												0.99	0.51	3.46	0	4.84	0	314.6	232.9		346.2	405.6	11.4	26.2	0.7	1.9		736.4	757.2	183	218	19.4	32.9
Mg618	2352		NXFT01001538.1.3995_g		8.21e-48	Minc3s00381g11350	IPR002213 UDP-glucuronosyl/UDP-glucosyltransferase	1.12e-87									2.1	0.06	3.46	0	4.93	0	163.3	186		37.9	35.8	5.9	12.1	1.2	0.3		150.9	164.2	78.1	108.8	20.8	17.8
Mg1467	1081		NXFT01002213.1.5889_g	IPR036908 RlpA-like domain superfamily	8.89e-159	Minc3s00489g13197	IPR036908 RlpA-like domain superfamily	3.49e-40									0.68	0.7	3.42	0	2.73	0	415.7	325.3		96.7	121.6	7.7	6.2	3.4	1.9		138.1	210.7	57.8	87.5	13.4	21.2
Mg851	574		NXFT01003643.1.9514_g		2.79e-156												2.25	0.01	3.42	0	3.35	0	202.8	207.9		45	26.9	17	18	18.5	14		176.5	168.3	235.2	132.9	181.2	148.8
Mg583	2093		NXFT01001574.1.4100_g		0.0	Minc3s00020g01299		8.04e-94									1.28	0.49	3.4	0.01	4.84	0	551.5	593		56.7	94.9	11.4	15.6	2.8	0.9		153.8	209.3	118.7	158.4	35	70.1
Mg148	1075		NXFT01003237.1.766_g	IPR003146 Carboxypeptidase 2C activation peptide IPR036990 Metallocarboxypeptidase-like 2C propeptide	7.43e-100	Minc3s02685g31187		2.07e-19									1.32	0.35	3.39	0	4.06	0	2034.8	1647.7		303.8	408.6	32.9	68.7	16.1	10.5		921.2	858.3	374.6	676.9	214.5	230.4
Mg3675	284																0.69	0.78	3.39	0	3.88	0	171.2	118.1		59.1	97.9	3.1	5	0.6	0.3		129.6	120.5	32.8	44.9	2.7	4.4
Mg613	1476		NXFT01003778.1.867_g	IPR001563 Peptidase S10 2C serine carboxypeptidase IPR029058 Alpha/Beta hydrolase fold	0.0	Minc3s01332g22852	IPR001563 Peptidase S102C serine carboxypeptidase IPR029058 Alpha/Beta hydrolase fold	5.07e-168	CE02733		Uncharacterized serine carboxypeptidase F41C3.5	6e-114	Q20970	Caenorhabditis elegans	Methionyl-tRNA synthetase, cytoplasmic	1e-112	0.71	0.79	3.38	0	5.63	0	154.3	145		153.2	293.2	11.4	13.2	0.6	0.6		351.3	374.6	133.6	116.6	9.5	24.5
Mg2037	478																1.41	0.43	3.36	0.01	3.98	0	327.7	473		21.4	32.8	4.9	6.2	1.5	0.3		81.3	60.4	47.7	60.6	11.6	14.9
Mg2244	1067		NXFT01004130.1.976_g	IPR001464 Annexin IPR018252 Annexin repeat 2C conserved site IPR018502 Annexin repeat IPR037104 Annexin superfamily	0.0	Minc3s03009g32417	IPR001464 Annexin IPR018252 Annexin repeat2C conserved site IPR018502 Annexin repeat IPR037104 Annexin superfamily	0.0	CE35364	nex-2	Annexin	8e-65	P12429	Homo sapiens	Annexin A3	1e-59	2.02	0.13	3.31	0	-1.71	0	220.2	265.7		7.3	9.1	4.9	5	154.8	152.8		25.8	38.5	36.8	57	34.3	60.5
Mg707	915		NXFT01001750.1.4516_g	IPR001283 Cysteine-rich secretory protein-related IPR002413 Venom allergen 5-like IPR014044 CAP domain IPR035940 CAP superfamily	0.0	Minc3s00297g09642	IPR001283 Cysteine-rich secretory protein-related IPR002413 Venom allergen 5-like IPR014044 CAP domain IPR018244 Allergen V5/Tpx-1-related2C conserved site IPR035940 CAP superfamily	2.74e-77	CE30944	vap-1	Venom-Allergen-like Protein	2e-34	Q16937	Ancylostoma	Ancylostoma secreted protein	1e-29	9.56	0.09	3.27	0.01	2.57	0.01	10.7	13.4		0.3	0.3	4.9	5	2.5	3.8		11.6	13.9	51	40	20.4	13.7
Mg1384	1981		NXFT01003976.1.10402_g	IPR008160 Collagen triple helix repeat	0.0	Minc3s01498g24278	IPR002035 von Willebrand factor2C type A IPR010734 Copine IPR036465 von Willebrand factor A-like domain superfamily	1.04e-168	CE19827	cpna-1	Copine family protein 1	8e-113	Q09221	Caenorhabditis elegans	Copine family protein 2	3e-80	0.82	0.85	3.18	0.01	-0.23	0.98	28.7	19.8		28.5	18	2.1	2.6	24.6	16.3		30.1	52.2	19.2	19.4	17.6	17.4
Mg2527	558		NXFT01001026.1.2657_g		0.0	Minc3s00994g19674		5.42e-66									0.58	0.89	3.11	0	0.93	0.17	166.6	199.1		37.9	47.6	7.7	7.3	18.2	10.8		44.3	82.2	72.7	53.5	28.6	27
Mg1167	1344		NXFT01001189.1.3042_g		0.0												4.58	0.03	3.09	0	3.58	0	61.9	68.1		2.6	3.2	5.9	9.7	6.1	2.8		48.6	78.1	89.6	36.4	61.5	44.6
Mg6633	1362		NXFT01000737.1.1776_g	IPR001128 Cytochrome P450 IPR002401 Cytochrome P450 2C E-class 2C group I IPR017972 Cytochrome P450 2C conserved site IPR036396 Cytochrome P450 superfamily	0.0	Minc3s01018g19904	IPR001128 Cytochrome P450 IPR002401 Cytochrome P4502C E-class2C group I IPR017972 Cytochrome P4502C conserved site IPR036396 Cytochrome P450 superfamily	0.0	CE31452	cyp-33E1	Cytochrome P450 family	3e-71	P00179	Oryctolagus cuniculus	Cytochrome P450 2C5	4e-50	10.71	0.01	3.08	0	-0.07	1	56.3	85.6		0.3	0.3	4	2.6	46.3	36.8		24.4	31.7	26.7	26.5	39.2	40
Mg23	683																0.82	0.69	3.02	0	3.68	0	528.5	474.1		33.2	41.7	2.1	8.5	1.5	1.2		60	71.3	33.4	44.9	11.2	19.5
Mg325	4188	SP	NXFT01004291.1.11196_g	IPR001547 Glycoside hydrolase 2C family 5 IPR017853 Glycoside hydrolase superfamily IPR018087 Glycoside hydrolase 2C family 5 2C conserved site	0.0	Minc3s00708g16378	IPR007588 Zinc finger2C FLYWCH-type IPR018289 MULE transposase domain	2.06e-174					P07103	Dickeya dadantii	Endoglucanase Z	8e-22	1.43	0.59	3.01	0.05	3.41	0.01	1929.9	1343.1		108.5	112.7	26.3	49.8	16.4	9.2		254.7	339.1	178.3	424.4	108.6	164.7
Mg31070	1743		NXFT01001208.1.261_g		0.0	Minc3s01603g25042		0.0	CE15698	tag-297	Temporarily Assigned Gene name	0.0					2.46	0.03	2.97	0	-2.42	0	4.3	3.4		7.3	12.1	2.1	6.2	317.1	318.5		54.3	48.1	28	30.8	61.2	57.6
Mg1577	482		NXFT01000730.1.1754_g		1.97e-92	Minc3s00249g08561		5.31e-12									1.19	0.22	2.86	0	3.74	0	248	212.3		101.5	163	18.9	26.2	2.6	0.9		308.7	289.9	153.9	167.6	18.3	28.3
Mg3521	2030		NXFT01001001.1.50_g	IPR000008 C2 domain IPR035892 C2 domain superfamily	0.0	Minc3s02159g28608	IPR009939 Fungal chitosanase	3.61e-46	CE41018	snt-7	SyNapTotagmin	3e-79	P24507	Discopyge ommata	Synaptotagmin-C	8e-15	1.07	0.44	2.79	0	-0.24	0.95	64.9	58		42.6	23.9	11.4	7.3	20.2	21.7		71.3	69.9	84.2	44.9	16.9	18.7
Mg5308	2238		NXFT01001142.1.2981_g	IPR003663 Sugar/inositol transporter IPR005828 Major facilitator 2C sugar transporter-like IPR005829 Sugar transporter 2C conserved site IPR020846 Major facilitator superfamily domain IPR036259 MFS transporter superfamily	0.0	Minc3s00816g17713	IPR003663 Sugar/inositol transporter IPR005828 Major facilitator2C sugar transporter-like IPR005829 Sugar transporter2C conserved site IPR020846 Major facilitator superfamily domain IPR036259 MFS transporter superfamily	0.0	CE33672	hmit-1.3	H(+) MyoInositol coTransporter	5e-160	Q96QE2	Homo sapiens	Proton myo-inositol cotransporter	3e-86	3.55	0.16	2.79	0.03	1.49	0.08	66.2	79.6		2.6	0.3	2.1	2.6	15	8.3		20.2	11.2	15.8	13.7	30.4	35
Mg341	824		NXFT01002632.1.6954_g	IPR001919 Carbohydrate-binding type-2 domain IPR008965 CBM2/CBM3 2C carbohydrate-binding domain superfamily IPR012291 CBM2 2C carbohydrate-binding domain superfamily IPR019028 Carbohydrate binding domain CBM49	0.0	Minc3s01081g20527	IPR001547 Glycoside hydrolase2C family 5 IPR008965 CBM2/CBM32C carbohydrate-binding domain superfamily IPR012291 CBM22C carbohydrate-binding domain superfamily IPR017853 Glycoside hydrolase superfamily IPR019028 Carbohydrate binding domain CBM49	7.90e-16									0.84	0.6	2.7	0	4.22	0	1393	1118.8		268.5	219.2	34.7	47.5	4.5	1.5		409.6	462.1	206.1	323.7	53.7	61.8
Mg5815	1554		NXFT01001994.1.5154_g	IPR002554 Protein phosphatase 2A 2C regulatory B subunit 2C B56 IPR011989 Armadillo-like helical IPR016024 Armadillo-type fold	0.0	Minc3s00144g05956	IPR002554 Protein phosphatase 2A2C regulatory B subunit2C B56 IPR011989 Armadillo-like helical IPR016024 Armadillo-type fold	0.0	CE32003	pptr-1	Serine\/threonine-protein phosphatase 2A regulatory subunit pptr-1	1e-72	Q6GV12	Mus musculus	3-ketodihydrosphingosine reductase	9e-71	0.15	1	2.65	0.01	2.06	0.01	37.8	27.4		52	44.6	6.8	12.1	25.1	33.9		58.5	49.5	30.7	82.5	93.7	149.6
Mg1044	1164		NXFT01001830.1.4729_g		0.0												1.94	0.35	2.64	0.05	4.75	0	210.2	234.3		23.8	15.1	5.9	13.2	1.1	0.3		44.3	105.5	51.7	61.3	11.6	17.4
Mg3908	540		NXFT01003123.1.8134_g	IPR007110 Immunoglobulin-like domain IPR013098 Immunoglobulin I-set IPR013783 Immunoglobulin-like fold IPR036179 Immunoglobulin-like domain superfamily	3.39e-155	Minc3s01999g27675	IPR007110 Immunoglobulin-like domain IPR013098 Immunoglobulin I-set IPR013783 Immunoglobulin-like fold IPR036179 Immunoglobulin-like domain superfamily	1.64e-69	CE04757	zig-12	2 (Zwei) IG domain protein	4e-16					0.13	1	2.63	0.01	3.16	0	183.2	144.7		40.3	41.7	10.5	2.6	1.5	0.9		40.1	49.5	42.9	39.3	7.3	12
Mg757	808	SP															0.33	1	2.63	0.01	1.9	0.02	55.8	41		21.4	53.5	5.9	6.2	4.5	5.7		34.4	57.7	29.4	42.1	19	17.4
Mg9651	678		NXFT01001580.1.4122_g	IPR000536 Nuclear hormone receptor 2C ligand-binding domain IPR001628 Zinc finger 2C nuclear hormone receptor-type IPR001723 Nuclear hormone receptor IPR013088 Zinc finger 2C NHR/GATA-type IPR035500 Nuclear hormone receptor-like domain superfamily	0.0	Minc3s00556g14247	IPR000536 Nuclear hormone receptor2C ligand-binding domain IPR001628 Zinc finger2C nuclear hormone receptor-type IPR001723 Nuclear hormone receptor IPR013088 Zinc finger2C NHR/GATA-type IPR035500 Nuclear hormone receptor-like domain superfamily	2.16e-44	CE39696	nhr-64	Nuclear hormone receptor family member nhr-64	9e-18	Q6P8D9	Xenopus tropicalis	NEDD8-conjugating enzyme Ubc12	1e-16	1.35	0.57	2.62	0.01	1.29	0.14	25	33.1		12	12.1	3.1	10.9	14	23.3		34.4	26.2	42.2	37.9	48.4	41.7
Mg26735	973		NXFT01003497.1.9130_g	IPR002083 MATH/TRAF domain	0.0	Minc3s03241g33265		1.83e-72									1.03	0.8	2.6	0.04	-0.59	0.75	5.1	4.5		9.7	12.1	2.1	2.6	35.9	29.7		24.4	19.4	15.2	10.9	20.1	23.7
Mg1931	663					Minc3s02358g29650		6.31e-52									0.43	0.99	2.6	0.02	0.67	0.71	144.9	125.6		42.6	6.2	7.7	12.1	18.6	23		33	35.8	58.5	57	26.5	39.2
Mg12109	152		NXFT01000427.1.5610_g		5.74e-73												-0.22	1	2.53	0.03	2.72	0.01	2843.5	1772.1		221.5	166	47.8	26.2	14	9.9		150.9	182	152.6	276.2	63.3	94.4
Mg4496	1766		NXFT01003119.1.8120_g	IPR002035 von Willebrand factor 2C type A IPR036465 von Willebrand factor A-like domain superfamily	0.0	Minc3s00632g15382	IPR002035 von Willebrand factor2C type A IPR030755 von Willebrand factor A domain-containing protein 2 IPR036465 von Willebrand factor A-like domain superfamily	0.0	CE27718			2e-148	A6NMZ7	Homo sapiens	Collagen alpha-6(VI) chain	2e-13	0.62	0.84	2.49	0	1.6	0.01	221	148.6		37.9	35.8	5.9	9.7	9.8	9.9		52.8	60.4	53.1	30.1	28.9	29.6
Mg1088	4532		NXFT01001705.1.440_g	IPR003020 Bicarbonate transporter 2C eukaryotic IPR011531 Bicarbonate transporter 2C C-terminal IPR016152 Phosphotransferase/anion transporter	0.0	Minc3s03246g33277	IPR003020 Bicarbonate transporter2C eukaryotic IPR011531 Bicarbonate transporter2C C-terminal IPR016152 Phosphotransferase/anion transporter	0.0	CE28476	abts-3	Anion/Bicarbonate TranSporter family	0.0	P51824	Solanum tuberosum	ADP-ribosylation factor 1	1e-136	0.04	1	2.48	0.02	1.17	0.25	102.4	109.5		42.6	44.6	2.1	10.9	6.4	7.3		51.4	38.5	26	40.7	11.6	18.7
Mg415	542																1.21	0.03	2.45	0	2.97	0	603.9	685.5		89.7	97.9	31.9	32.1	8.7	11.5		196.4	236.6	158	190.3	79.9	72.2
Mg679	4313		NXFT01003305.1.8628_g	IPR000008 C2 domain IPR000909 Phosphatidylinositol-specific phospholipase C 2C X domain IPR001192 Phosphoinositide phospholipase C family IPR001711 Phospholipase C 2C phosphatidylinositol-specific 2C Y domain IPR011992 EF-hand domain pair IPR015359 Phosphoinositide-specific phospholipase C 2C EF-hand-like domain IPR016280 Phosphatidylinositol-4 2C 5-bisphosphate phosphodiesterase beta IPR017946 P…	0.0	Minc3s00067g03367	IPR000008 C2 domain IPR000909 Phosphatidylinositol-specific phospholipase C2C X domain IPR001192 Phosphoinositide phospholipase C family IPR001711 Phospholipase C2C phosphatidylinositol-specific2C Y domain IPR011992 EF-hand domain pair IPR016280 Phosphatidylinositol-42C 5-bisphosphate phosphodiesterase beta IPR017946 PLC-like phosphodiesterase2C TIM beta/alpha-barrel domain superfamily IPR035892 …	0.0	CE36909	egl-8	1-phosphatidylinositol 4,5-bisphosphate phosphodiesterase beta egl-8	2e-64	Q17353	Caenorhabditis elegans	Partitioning defective protein 3	3e-65	0.63	0.9	2.45	0	1.04	0.11	167.6	138.1		16.7	23.9	9.6	7.3	12.3	9.6		34.4	27.6	32.8	58.4	21.9	22.9
Mg584	920					Minc3s00241g08361		3.89e-54									0.49	0.96	2.41	0.04	1.78	0.09	66.4	64		26.2	23.9	2.1	6.2	2.2	1.5		31.5	38.5	15.8	24.4	4.2	7.8
Mg2977	2260		NXFT01004093.1.10705_g	IPR001611 Leucine-rich repeat IPR001810 F-box domain IPR006553 Leucine-rich repeat 2C cysteine-containing subtype IPR032675 Leucine-rich repeat domain superfamily IPR036047 F-box-like domain superfamily	0.0	Minc3s02452g30118	IPR001611 Leucine-rich repeat IPR001810 F-box domain IPR006553 Leucine-rich repeat2C cysteine-containing subtype IPR032675 Leucine-rich repeat domain superfamily	0.0	CE30418	fbxl-1	Uncharacterized F-box\/LRR-repeat protein C02F5.7	5e-124	Q641G4	Xenopus laevis	Condensin-2 complex subunit H2	6e-123	0.28	1	2.39	0.02	0.15	1	52.9	61.2		35.6	47.6	5.9	5	29.7	24.3		31.5	68.6	17.9	37.1	29.3	30.8
Mg1392	585					Minc3s05725g38721		5.73e-59									0.33	0.92	2.38	0	3.83	0	222.4	236.1		68.5	103.8	17	20.3	1.5	2.2		105.4	109.6	90.3	101.7	22.9	21.2
Mg1197	1649		NXFT01002286.1.6061_g	IPR012816 NADAR IPR037238 YbiA-like superfamily	0.0	Minc3s00579g14565	IPR001283 Cysteine-rich secretory protein-related IPR002413 Venom allergen 5-like IPR014044 CAP domain IPR035940 CAP superfamily	1.21e-116	CE07993	irg-1	Infection Response Gene	2e-17	Q5UR67	Acanthamoeba polyphaga	Uncharacterized protein R617	6e-12	0.53	0.96	2.38	0.03	-0.21	1	55.3	65.6		16.7	35.8	4	5	6.3	7		28.7	45.4	18.5	25.8	7	4.4
Mg3644	1903		NXFT01000636.1.170_g	IPR029058 Alpha/Beta hydrolase fold	0.0	Minc3s07711g41436	IPR000639 Epoxide hydrolase-like IPR010497 Epoxide hydrolase2C N-terminal IPR016292 Epoxide hydrolase IPR029058 Alpha/Beta hydrolase fold	1.46e-143	CE14390		Epoxide hydrolase	6e-95	P79381	Sus scrofa	Epoxide hydrolase 1	3e-86	1.23	0.57	2.35	0.01	0.14	1	23.5	54.2		14.4	12.1	6.8	8.5	75.9	70.1		24.4	37.2	42.9	32.2	79.2	81.8
Mg894	862		NXFT01002747.1.7211_g	IPR000504 RNA recognition motif domain IPR012677 Nucleotide-binding alpha-beta plait domain superfamily IPR035979 RNA-binding domain superfamily	0.0	Minc3s00682g16025	IPR000504 RNA recognition motif domain IPR012677 Nucleotide-binding alpha-beta plait domain superfamily IPR035979 RNA-binding domain superfamily IPR037366 BOULE/DAZ family	7.57e-52	CE42801	sup-12	SUPpressor	1e-26	Q7T3I7	Xenopus laevis	RNA-binding protein 38	4e-33	0.66	0.9	2.34	0.01	0.82	0.49	65.2	69.1		23.8	44.6	5.9	10.9	12.9	6		58.5	48.1	38.9	42.1	17.3	16.6
Mg1444	2528		NXFT01004193.1.10905_g	IPR001309 Peptidase C14 2C p20 domain IPR007110 Immunoglobulin-like domain IPR013783 Immunoglobulin-like fold IPR029030 Caspase-like domain superfamily IPR036179 Immunoglobulin-like domain superfamily	0.0	Minc3s00075g03709	IPR001309 Peptidase C142C p20 domain IPR007110 Immunoglobulin-like domain IPR013783 Immunoglobulin-like fold IPR029030 Caspase-like domain superfamily IPR036179 Immunoglobulin-like domain superfamily	0.0	CE29773	malt-1	MALT1 paracaspase homolog	4e-101	O54698	Rattus norvegicus	Equilibrative nucleoside transporter 1	4e-36	1.21	0.16	2.34	0	1.65	0	168.5	130.4		54.4	41.7	16.1	14.4	8	7.3		104	119.1	66.6	86.1	18.3	29.1
Mg2662	550		NXFT01002964.1.7786_g		0.0	Minc3s00520g13675		4.46e-48									0.61	0.89	2.31	0.03	2.26	0.1	286.5	201.2		33.2	62.4	2.1	6.2	0.6	0.9		65.6	78.1	17.9	19.4	1.7	3.2
Mg2861	5801		NXFT01003808.1.9872_g		0.0	Minc3s00229g08097		0.0	CE43614			7e-17					-0.13	1	2.3	0.01	0.79	0.45	54.2	101.7		28.5	47.6	7.7	9.7	16.6	11.2		33	35.8	36.1	47.1	24	24.1
Mg3345	2904		NXFT01000999.1.21_g		0.0	Minc3s00371g11168		4.04e-121									-0.35	1	2.28	0.02	0.02	1	48.1	51.5		40.3	50.6	3.1	9.7	19.1	16.6		25.8	45.4	34.1	23.7	20.1	16.2
Mg1601	464		NXFT01003962.1.943_g		2.33e-126	Minc3s00056g02915		8.23e-11									1.24	0.38	2.23	0.02	5.37	0	173.2	141.3		200.3	305	31	81.7	1.1	1.9		554.5	632.9	267.7	254.2	39.9	52.6
Mg4352	1616		NXFT01001208.1.263_g	IPR000615 Bestrophin IPR021134 Bestrophin/UPF0187	0.0	Minc3s00778g17226	IPR000615 Bestrophin IPR021134 Bestrophin/UPF0187	0.0	CE47806	best-22	Bestrophin homolog	1e-178	Q23369	Caenorhabditis elegans	Uncharacterized protein ZC518.1	1e-175	-0.05	1	2.22	0.02	2.09	0.01	52.2	57.5		23.8	12.1	8.6	5	8.8	5.7		14.5	20.8	31.4	31.5	33.5	27.5
Mg925	1819		NXFT01000831.1.2085_g	IPR001506 Peptidase M12A IPR006026 Peptidase 2C metallopeptidase IPR024079 Metallopeptidase 2C catalytic domain superfamily	0.0	Minc3s00138g05784	IPR001506 Peptidase M12A IPR003582 ShKT domain IPR006026 Peptidase2C metallopeptidase IPR024079 Metallopeptidase2C catalytic domain superfamily IPR034035 Astacin-like metallopeptidase domain	0.0	CE03479	nas-10	Zinc metalloproteinase nas-10	3e-64	Q21388	Caenorhabditis elegans	Zinc metalloproteinase nas-10	4e-63	1.21	0.07	2.16	0	3.09	0	416.5	348.1		73.2	74.2	34.7	40.4	12.1	8.6		158	182	151.2	182.5	75	100.7
Mg2243	372																1.78	0.04	2.13	0	1.41	0.03	152.7	82.5		47.3	62.4	9.6	13.2	3.7	5.4		192.1	180.6	51	46.4	11.2	11.6
Mg292	302																10.43	0.02	2.13	0.02	1.34	0.03	265.6	236		0.3	0.3	5.9	3.8	9.1	10.5		15.9	30.3	21.9	19.4	20.1	28.7
Mg906	3864		NXFT01001244.1.3169_g	IPR000595 Cyclic nucleotide-binding domain IPR001873 Epithelial sodium channel IPR014710 RmlC-like jelly roll fold IPR018488 Cyclic nucleotide-binding 2C conserved site IPR018490 Cyclic nucleotide-binding-like IPR032406 Cyclic nucleotide-gated channel 2C C-terminal leucine zipper domain	0.0	Minc3s00870g18286	IPR001873 Epithelial sodium channel	0.0	CE46923	acd-5		2e-130	P10587	Gallus gallus	Myosin-11	1e-25	0.38	0.96	2.13	0	0.92	0.16	200.7	151		61.5	65.4	24.5	9.7	27.8	28.5		89.8	75.4	73.4	77.6	41.7	64.7
Mg3398	1501		NXFT01002742.1.7202_g	IPR004843 Calcineurin-like phosphoesterase domain 2C ApaH type IPR008963 Purple acid phosphatase-like 2C N-terminal IPR015914 Purple acid phosphatase 2C N-terminal IPR025733 Iron/zinc purple acid phosphatase-like C-terminal domain IPR029052 Metallo-dependent phosphatase-like IPR039331 Purple acid phosphatase-like	0.0	Minc3s00815g17701	IPR004843 Calcineurin-like phosphoesterase domain2C ApaH type IPR008963 Purple acid phosphatase-like2C N-terminal IPR015914 Purple acid phosphatase2C N-terminal IPR025733 Iron/zinc purple acid phosphatase-like C-terminal domain IPR029052 Metallo-dependent phosphatase-like IPR041792 Purple acid phosphatase2C metallophosphatase domain	0.0	CE47027		Purple acid phosphatase	0.0	Q11174	Caenorhabditis elegans	Probable endochitinase	2e-131	0.62	0.92	2.12	0.03	0.26	0.95	69.3	83		30.9	12.1	4	9.7	27.3	21.7		31.5	35.8	25.3	30.8	26.8	32.1
Mg3163	2321		NXFT01004044.1.10566_g	IPR001275 DM DNA-binding domain IPR026607 DMRT/protein doublesex/protein male abnormal 3 IPR036407 DM DNA-binding domain superfamily	0.0	Minc3s00281g09308	IPR001275 DM DNA-binding domain IPR026607 DMRT/protein doublesex/protein male abnormal 3 IPR036407 DM DNA-binding domain superfamily	8.03e-154	CE29814	dmd-7	DM (Doublesex/MAB-3) Domain family	3e-42					0.04	1	2.11	0.04	0.61	0.72	32.1	35		7.3	23.9	7.7	5	26.2	28.1		11.6	19.4	28.7	25.1	37.8	45
Mg466	515		NXFT01003719.1.10320_g		0.0	Minc3s00058g02996		1.53e-27									1.44	0.04	2.1	0	2	0	505.4	553.8		87.3	106.8	49.6	64	90.2	73.7		196.4	326.8	275.1	208.8	327.8	327
Mg5608	3457		NXFT01003932.1.10256_g	IPR006680 Amidohydrolase-related IPR010252 Formiminoglutamate deiminase IPR011059 Metal-dependent hydrolase 2C composite domain superfamily IPR032466 Metal-dependent hydrolase	0.0	Minc3s01856g26793	IPR006680 Amidohydrolase-related IPR010252 Formiminoglutamate deiminase IPR011059 Metal-dependent hydrolase2C composite domain superfamily IPR032466 Metal-dependent hydrolase	0.0	CE26624	cpin-1	CyPIN (guanine aminohydrolase) homolog	1e-95					0.2	1	2.08	0.01	0.78	0.42	58.5	54		30.9	44.6	9.6	6.2	12.8	12.8		57.1	29	31.4	34.3	20.8	22.9
Mg1395	2191		NXFT01002072.1.560_g	IPR011701 Major facilitator superfamily IPR020846 Major facilitator superfamily domain IPR036259 MFS transporter superfamily	0.0	Minc3s01022g19939	IPR011701 Major facilitator superfamily IPR020846 Major facilitator superfamily domain IPR036259 MFS transporter superfamily	0.0	CE06516			2e-166	Q9NRA2	Homo sapiens	Sialin	2e-30	1.07	0.07	2.07	0	1.14	0	243.3	246.9		80.3	62.4	24.5	22.7	28.6	24.3		139.5	161.5	98.4	98.1	54.4	61.8
Mg1631	1674		NXFT01000088.1.2220_g		0.0	Minc3s00133g05642		1.42e-154	CE45630	gei-15	GEX Interacting protein	2e-21					0.28	0.98	2.05	0	0.19	0.97	118.7	85.1		54.4	50.6	16.1	9.7	11.3	16.3		61.4	65.9	50.4	56.3	13.4	17.8
Mg5	152		NXFT01000427.1.5610_g		5.74e-73	Minc3s03837g34949		2.26e-15									0.21	0.92	2.05	0	2.99	0	2284.6	2211		136.8	166	43.1	42.7	9.9	8.6		176.5	173.8	176.3	176.9	76	68.5
Mg11408	242		NXFT01003033.1.7967_g		6.06e-45												0.22	1	2.04	0.03	2.15	0.05	17.6	11.6		127.3	154.1	4.9	9.7	1.4	0.6		175.1	151.9	34.1	23	2.7	5.3
Mg3216	457		NXFT01001705.1.442_g		4.62e-173	Minc3s02323g29460		3.36e-49									0.87	0.77	2.04	0.05	2.69	0	322.1	247.1		122.6	44.6	30.1	16.8	6	7.3		179.3	131.4	86.9	106.6	31.4	50.5
Mg3396	1689		NXFT01001567.1.4079_g	IPR001223 Glycoside hydrolase family 18 2C catalytic domain IPR001579 Glycoside hydrolase 2C chitinase active site IPR011583 Chitinase II IPR017853 Glycoside hydrolase superfamily IPR029070 Chitinase insertion domain superfamily	0.0	Minc3s02342g29561	IPR001223 Glycoside hydrolase family 182C catalytic domain IPR001579 Glycoside hydrolase2C chitinase active site IPR011583 Chitinase II IPR017853 Glycoside hydrolase superfamily IPR029070 Chitinase insertion domain superfamily	6.34e-86	CE03923	cht-1	Probable endochitinase	2e-44	Q11174	Caenorhabditis elegans	Probable endochitinase	4e-43	1.05	0.36	2.03	0.01	1.98	0	344.3	246.9		87.3	136.4	17	38	9.1	11.8		261.8	197	105.2	115.2	34.6	45.4
Mg3580	1584		NXFT01003962.1.944_g	IPR000276 G protein-coupled receptor 2C rhodopsin-like IPR019424 Serpentine type 7TM GPCR chemoreceptor Srsx	0.0	Minc3s02781g31547	IPR000276 G protein-coupled receptor2C rhodopsin-like IPR017452 GPCR2C rhodopsin-like2C 7TM IPR019424 Serpentine type 7TM GPCR chemoreceptor Srsx	1.65e-146									1.03	0.11	2.03	0	0.96	0.02	89.9	73.3		120.3	148.2	35.7	26.2	26.5	20.5		260.3	284.5	135	117.3	46.6	45
Mg1733	712		NXFT01003663.1.9573_g	IPR013783 Immunoglobulin-like fold IPR036179 Immunoglobulin-like domain superfamily	0.0	Minc3s06943g40519	IPR013783 Immunoglobulin-like fold IPR036179 Immunoglobulin-like domain superfamily	5.19e-90	CE04757	zig-12	2 (Zwei) IG domain protein	7e-12					0.46	0.79	2.02	0	4.05	0	281.9	231.7		125	192.6	33.8	30.9	4.4	6		200.6	232.5	141.1	120.8	77.1	83.5
Mg5080	391					Minc3s07283g40937	IPR032135 Helix-turn-helix domain (DUF4817)	1.23e-33									1.57	0.32	2	0.04	0.83	0.41	126.2	79.8		14.4	12.1	5.9	8.5	25	19.5		23	54.9	24.6	30.8	39.6	39.2
Mg705	1881		NXFT01003245.1.8444_g	IPR002226 Catalase haem-binding site IPR010582 Catalase immune-responsive domain IPR011614 Catalase core domain IPR018028 Catalase 2C mono-functional 2C haem-containing IPR020835 Catalase superfamily IPR024708 Catalase active site IPR024711 Catalase 2C mono-functional 2C haem-containing 2C clades 1 and 3 IPR037060 Catalase core domain superfamily	0.0	Minc3s00005g00340	IPR002226 Catalase haem-binding site IPR010582 Catalase immune-responsive domain IPR011614 Catalase core domain IPR018028 Catalase2C mono-functional2C haem-containing IPR020835 Catalase superfamily IPR024708 Catalase active site IPR024711 Catalase2C mono-functional2C haem-containing2C clades 1 and 3 IPR037060 Catalase core domain superfamily	0.0	CE22478	ctl-3	Catalase	5e-135	P90682	Ascaris suum	Catalase	3e-140	1	0.44	2	0.02	2.47	0	2438.4	1468		614.5	955.9	142.8	229.2	29.2	20.5		1586.3	1559.3	655.5	829.3	130.6	144.6
Mg23846	553		NXFT01003524.1.9193_g	IPR001623 DnaJ domain IPR018253 DnaJ domain 2C conserved site IPR036869 Chaperone J-domain superfamily	6.32e-93	Minc3s01566g24774		2.44e-11									-1.5	0.29	-2.31	0.02	-1.75	0.02	2.74	1.52		80.28	53.52	32.86	22.68	87.02	55.71		30.11	18.03	4.33	7.36	22.92	19.93
Mg73018	594					Minc3s02147g28550	IPR000504 RNA recognition motif domain IPR012677 Nucleotide-binding alpha-beta plait domain superfamily IPR035979 RNA-binding domain superfamily	1.69e-31	CE29697			8e-29	P24733	Aequipecten	Myosin heavy chain, striated muscle	1e-33	-4.25	0.08	-3.47	0.04	-0.93	0.75	0.27	0.27		61.45	18.02	61.73	47.46	6.44	4.43		1.69	3	2.97	7.36	2.04	4.03
Mg61667	1050					Minc3s07360g41028	IPR002100 Transcription factor2C MADS-box IPR033896 MADS MEF2-like IPR036879 Transcription factor2C MADS-box superfamily	1.89e-14	CE25156	mef-2	related to vertebrate MEF2 transcription factor	2e-13	Q0J8G8	Oryza sativa	MADS-box transcription factor 26	1e-73	-1.03	0.8	-4.3	0.05	1.38	0.34	0.27	0.27		33.21	44.65	117.61	171.35	1.22	3.79		21.58	16.66	6.36	8.78	7.35	3.61
Mg61495	1964												Q9LI74	Arabidopsis thaliana	Protein CHUP1, chloroplastic	2e-39	-3.53	0.08	-5.28	0.05	-2.04	0.05	0.27	0.27		21.45	44.65	46.83	62.8	19.11	40		4.53	1.63	1.62	1.68	7.7	6.96
Mg66568	559					Minc3s02447g30087	IPR000218 Ribosomal protein L14P IPR019972 Ribosomal protein L14P2C conserved site IPR036853 Ribosomal protein L14 superfamily	7.65e-83	CE00778	rpl-23	60S ribosomal protein L23	1e-71	P48158	Caenorhabditis elegans	60S ribosomal protein L23	2e-70	-1.09	0.96	-6.27	0	-1	0.76	0.27	0.27		12.03	9.14	14.24	95.83	13.88	26.54		4.53	5.73	1.62	0.27	10.53	9.89
Mg66027	659					Minc3s05738g38748	IPR021138 60S ribosomal protein L18a/ L202C eukaryotes IPR023573 Ribosomal protein 50S-L18Ae/60S-L20/60S-L18A IPR028877 50S ribosomal protein L18Ae/60S ribosomal protein L20 and L18a	5.42e-56	CE21392	rpl-20	60S ribosomal protein L18a	4e-54	Q02543	Homo sapiens	60S ribosomal protein L18a	4e-68	1.05	1	-6.27	0	-0.98	0.87	0.31	0.27		0.27	3.22	22.62	88.76	9.77	26.86		0.27	5.73	0.27	1.68	8.76	9.89
Mg53468	832					Minc3s03064g32628	IPR001197 Ribosomal protein L10e IPR016180 Ribosomal protein L10e/L16 IPR018255 Ribosomal protein L10e2C conserved site IPR036920 Ribosomal protein L10e/L16 superfamily	6.79e-109	CE01543	rpl-10	60S ribosomal protein L10	2e-102	Q4R4D3	Macaca fascicularis	60S ribosomal protein L10-like	1e-112	-0.36	1	-6.46	0.05	-0.44	1	0.34	0.27		0.27	6.18	17.03	108.81	14.67	28.47		1.69	3	1.62	0.27	11.95	19.93
Mg62290	441																-8.86	0.4	-6.57	0.05	-7.64	0.09	0.27	0.27		9.68	6.18	30.07	39.2	2.48	4.75		0.27	0.27	0.94	0.27	0.27	0.27
Mg51947	524					Minc3s05425g38221	IPR001210 Ribosomal protein S17e IPR018273 Ribosomal protein S17e2C conserved site IPR036401 Ribosomal protein S17e-like superfamily	1.16e-54	CE26948	rps-17	40S ribosomal protein S17	2e-48	Q7ZUB2	Coturnix coturnix	40S ribosomal protein S17	1e-51	6.97	0.92	-6.73	0.04	-0.93	0.9	0.31	0.27		0.27	0.27	15.17	62.8	5.97	17.57		0.27	4.37	0.27	0.98	5.93	6.54
Mg66296	469	SP															0	1	-11.21	0.05	-5.83	0.43	0.27	0.27		0.27	0.27	37.52	41.56	0.9	1.55		0.27	0.27	0.27	0.27	0.27	0.27
Mg66517	954																6.42	0.94	-11.21	0.01	-1.04	0.97	0.27	0.27		0.27	0.27	27.27	52.18	0.9	1.23		3.11	0.27	0.27	0.27	0.97	0.27
Mg69066	1463																5.42	0.98	-11.24	0.04	-0.25	1	0.27	0.27		0.27	0.27	7.72	73.42	3.27	9.88		0.27	1.63	0.27	0.27	4.87	6.12
Mg66970	673																6.4	0.96	-11.42	0.03	-1.79	0.72	0.27	0.27		0.27	0.27	9.58	82.86	5.49	18.85		0.27	3	0.27	0.27	4.51	2.78
Mg49385	617					Minc3s00152g06205	IPR000589 Ribosomal protein S15 IPR009068 S15/NS12C RNA-binding IPR012606 Ribosomal protein S13/S152C N-terminal IPR023029 Ribosomal protein S15P	3.94e-83	CE04009	rps-13	40S ribosomal protein S13	1e-78	P62278	Rattus norvegicus	40S ribosomal protein S13	1e-90	1.09	1	-11.49	0.02	-0.56	1	0.31	0.27		2.62	0.27	11.44	85.22	8.82	21.1		0.27	5.73	0.27	0.27	8.76	11.56
Mg69240	1928					Minc3s05755g38781	IPR002194 Chaperonin TCP-12C conserved site IPR002423 Chaperonin Cpn60/TCP-1 family IPR012717 T-complex protein 12C delta subunit IPR017998 Chaperone tailless complex polypeptide 1 (TCP-1) IPR027409 GroEL-like apical domain superfamily IPR027410 TCP-1-like chaperonin intermediate domain superfamily IPR027413 GroEL-like equatorial domain superfamily	0.0	CE02262	cct-4	T-complex protein 1 subunit delta	0.0	Q7TPB1	Rattus norvegicus	T-complex protein 1 subunit delta	0.0	6.4	0.96	-11.7	0.01	-1.07	0.81	0.27	0.27		0.27	0.27	17.03	94.65	7.55	23.98		0.27	3	0.27	0.27	7.35	7.8
Mg69394	772					Minc3s00417g11967	IPR005755 Ribosomal protein L132C eukaryotic/archaeal IPR005822 Ribosomal protein L13 IPR036899 Ribosomal protein L13 superfamily	6.92e-81	CE01030	rpl-16	60S ribosomal protein L13a	4e-82	Q27389	Caenorhabditis elegans	60S ribosomal protein L13a	7e-81	-0.88	1	-11.98	0.02	-0.84	0.86	0.27	0.27		2.62	0.27	18.89	117.07	15.78	39.04		0.27	1.63	0.27	0.27	14.43	16.16

## Sheet: Tog8 vs Nip8
M. graminicola transcript	Length	SP & NLS prediction	Best blastn hit			Best blastx hit											edgeR						normalised CPM value
			M. graminicola			M. incognita			C. elegans				Uniprot				LogFC (Tog2 vs Nip2)	FDR (Padj)	LogFC (Tog4 vs Nip4)	FDR (Padj)	LogFC (Tog8 vs Nip8)	FDR (Padj)	pre-J2			in Nipponbare (S)							in TOG5681 (R )
			CDS	Fonction	e-value	Protein	Fonction	e-value	Protein	Class	Fonction	e-value	Protein	Species	Fonction	e-value							J2A	J2B		Nip2A	Nip2B	Nip4A	Nip4B	Nip8A	Nip8B		Tog2A	Tog2B	Tog4A	Tog4B	Tog8A	Tog8B
Mg44061	199	SP															5.42	1	9.55	0.3	12.09	0.02	0.43	0.31		0.27	0.27	0.27	0.27	0.27	0.27		0.27	1.63	15.16	10.2	132.68	12.4
Mg43431	374					Minc3s01055g20261	IPR000196 Ribosomal protein L19/L19e IPR015972 Ribosomal protein L19/L19e2C domain 1 IPR023638 Ribosomal protein L19/L19e conserved site IPR033935 Ribosomal protein L192C eukaryotic IPR035970 Ribosomal protein L19/L19e superfamily IPR039547 60S ribosomal protein L19	1.53e-52	CE08034	rpl-19	60S ribosomal protein L19	2e-43	P36241	Drosophila melanogaster	60S ribosomal protein L19	4e-46	-0.88	1	3.23	0.58	11.68	0.02	0.53	0.31		4.97	0.27	2.13	2.63	0.27	0.27		0.27	3	2.97	37.15	24.34	85.61
Mg9712	227																0	1	3.24	0.6	11.28	0	0.43	0.36		0.27	0.27	0.27	1.45	0.27	0.27		0.27	0.27	5	5.94	74.26	9.05
Mg5215	224					Minc3s00006g00383	IPR001515 Ribosomal protein L32e IPR018263 Ribosomal protein L32e2C conserved site IPR036351 Ribosomal protein L32e superfamily	8.98e-19	CE03709	rpl-32	60S ribosomal protein L32	3e-11	P84323	Drosophila pseudoobscura	60S ribosomal protein L32	9e-21	-0.88	1	3.75	0.62	11.25	0.05	9.86	0.82		2.62	0.27	2.13	0.27	0.27	0.27		0.27	1.63	15.16	13.03	73.2	8.22
Mg11020	619																-0.88	1	4.26	0.48	10.95	0.05	8.36	0.82		2.62	0.27	0.27	2.63	0.27	0.27		0.27	1.63	25.99	16.58	59.04	6.96
Mg4228	342												Q9GS21	Dictyostelium discoideum	60S ribosomal protein L28	4e-14	-0.38	1	3.37	0.65	10.93	0.03	0.46	0.27		0.27	6.18	2.13	0.27	0.27	0.27		3.11	1.63	2.3	19.42	14.43	50.89
Mg10818	1269					Minc3s00270g09065	IPR001650 Helicase2C C-terminal IPR011545 DEAD/DEAH box helicase domain IPR014001 Helicase superfamily 1/22C ATP-binding domain IPR014014 RNA helicase2C DEAD-box type2C Q motif IPR027417 P-loop containing nucleoside triphosphate hydrolase	0.0	CE03025	hel-1	Spliceosome RNA helicase DDX39B homolog	2e-178	Q5JK84	Oryza sativa	DEAD-box ATP-dependent RNA helicase 15	0.0	0	1	9.41	0.31	10.82	0.04	8.22	0.94		0.27	0.27	0.27	0.27	0.27	0.27		0.27	0.27	17.19	5.94	50.89	9.47
Mg10629	199					Minc3s02189g28759	IPR000626 Ubiquitin domain IPR001975 Ribosomal protein L40e IPR019954 Ubiquitin conserved site IPR019956 Ubiquitin IPR029071 Ubiquitin-like domain superfamily IPR038587 Ribosomal protein L40e superfamily	1.08e-21	CE15495	ubq-2	Ubiquitin	4e-23	P49633	Acanthamoeba castellanii	Ubiquitin-60S ribosomal protein L40	5e-24	0	1	3.96	0.64	10.8	0.05	3.74	0.41		0.27	0.27	0.27	1.45	0.27	0.27		0.27	0.27	12.45	5.23	50.89	9.05
Mg31098	236					Minc3s00201g07416	IPR002132 Ribosomal protein L5 IPR020929 Ribosomal protein L52C conserved site IPR022803 Ribosomal protein L5 domain superfamily IPR031309 Ribosomal protein L52C C-terminal IPR031310 Ribosomal protein L52C N-terminal	1.05e-37	CE07033	rpl-11.2	60S ribosomal protein L11-2	3e-38	Q3E757	Saccharomyces cerevisiae	60S ribosomal protein L11-B	2e-41	5.42	1	3.33	0.66	10.69	0.04	0.39	0.27		0.27	0.27	2.13	0.27	0.27	0.27		0.27	1.63	1.62	19.42	13.01	42.52
Mg53113	230					Minc3s01250g22088	IPR000235 Ribosomal protein S5/S7 IPR005716 Ribosomal protein S5/S72C eukaryotic/archaeal IPR020606 Ribosomal protein S72C conserved site IPR023798 Ribosomal protein S7 domain IPR036823 Ribosomal protein S7 domain superfamily	4.92e-15	CE06360	rps-5	40S ribosomal protein S5	3e-14	Q9ZUT9	Arabidopsis thaliana	40S ribosomal protein S5-1	1e-19	6.39	0.96	4.21	0.46	10.65	0.02	0.39	0.36		0.27	0.27	0.27	1.45	0.27	0.27		0.27	3	1.62	19.42	11.24	42.94
Mg108	332					Minc3s02939g32142	IPR001196 Ribosomal protein L152C conserved site IPR021131 Ribosomal protein L18e/L15P IPR030878 Ribosomal protein L15 IPR036227 Ribosomal L18e/L15P superfamily	4.21e-40	CE26774			8e-33	P14115	Mus musculus	60S ribosomal protein L27a	4e-38	-2.46	0.96	2.78	0.71	10.54	0.03	14.77	0.89		4.97	3.22	1.2	2.63	0.27	0.27		0.27	1.63	13.81	8.78	45.94	4.03
Mg8695	843					Minc3s00023g01448	IPR013126 Heat shock protein 70 family IPR029047 Heat shock protein 70kD2C peptide-binding domain superfamily IPR029048 Heat shock protein 70kD2C C-terminal domain superfamily	4.13e-148	CE09682	hsp-1	Heat shock 70 kDa protein A	6e-148	Q557E0	Dictyostelium discoideum	Heat shock cognate 70 kDa protein 2	1e-149	6.41	0.94	4.4	0.33	10.5	0.01	5.96	0.84		0.27	0.27	1.2	0.27	0.27	0.27		1.69	1.63	13.81	8.78	37.79	10.73
Mg17496	2213					Minc3s02380g29755	IPR001373 Cullin2C N-terminal IPR016157 Cullin2C conserved site IPR016158 Cullin homology domain IPR016159 Cullin repeat-like-containing domain superfamily IPR019559 Cullin protein2C neddylation domain IPR033044 Cullin-4B IPR036317 Cullin homology domain superfamily IPR036388 Winged helix-like DNA-binding domain superfamily IPR036390 Winged helix DNA-binding domain superfamily	2.26e-89	CE27593	cul-3	Cullin-3	2e-86	Q94AH6	Arabidopsis thaliana	Cullin-1	5e-132	-0.38	1	2.06	0.78	10.42	0.03	8.84	1.13		0.27	6.18	0.27	4.99	0.27	0.27		3.11	1.63	8.39	10.9	38.5	7.38
Mg14004	1052					Minc3s01581g24877	IPR000169 Cysteine peptidase2C cysteine active site IPR000668 Peptidase C1A2C papain C-terminal IPR025660 Cysteine peptidase2C histidine active site IPR025661 Cysteine peptidase2C asparagine active site IPR038765 Papain-like cysteine peptidase superfamily	3.74e-52	CE41106	cpr-6	Cathepsin B-like cysteine proteinase 6	9e-65	P43157	Schistosoma japonicum	Cathepsin B-like cysteine proteinase	1e-65	0.13	1	3.23	0.73	10.33	0.04	11.65	0.77		2.62	0.27	0.27	1.45	0.27	0.27		3.11	0.27	5.68	5.23	36.38	6.96
Mg23136	408																7.73	0.8	10.39	0.06	9.12	0.02	0.79	0.94		0.27	0.27	0.27	0.27	0.27	0.27		5.95	1.63	17.19	27.93	6.28	12.82
Mg4958	409		NXFT01002858.1.7503_g	IPR008597 Invertebrate-type lysozyme IPR023346 Lysozyme-like domain superfamily	2.81e-80	Minc3s00831g17873	IPR008597 Invertebrate-type lysozyme IPR023346 Lysozyme-like domain superfamily	1.28e-46	CE17549	ilys-2	Invertebrate-type lysozyme 2	4e-28	Q6L6Q5	Ostrea edulis	Lysozyme	4e-23	6.4	0.92	11.12	0.01	9	0	13.4	10.6		0.3	0.3	0.3	0.3	0.3	0.3		0.3	3	34.8	40	10.2	7.4
Mg12111	337		NXFT01001828.1.4703_g	IPR009009 RlpA-like protein 2C double-psi beta-barrel domain IPR036908 RlpA-like domain superfamily	2.10e-140	Minc3s03843g34959	IPR009009 RlpA-like protein2C double-psi beta-barrel domain IPR036908 RlpA-like domain superfamily	4.59e-40									6.99	0.89	10.48	0.05	8.89	0.02	10.7	4.1		0.3	0.3	0.3	0.3	0.3	0.3		3.1	1.6	11.8	36.4	8.1	8.2
Mg62862	208					Minc3s00884g18478	IPR000702 Ribosomal protein L6 IPR002359 Ribosomal protein L62C conserved site-2 IPR020040 Ribosomal protein L62C alpha-beta domain IPR036789 Ribosomal protein L62C alpha-beta domain superfamily	1.14e-13	CE01380	rpl-9	60S ribosomal protein L9	3e-13	P49210	Oryza sativa	60S ribosomal protein L9	3e-20	0.76	1	10.21	0.11	8.8	0.04	0.27	0.27		9.68	12.1	0.27	0.27	0.27	0.27		7.37	28.96	19.9	20.12	0.97	14.49
Mg27331	795																2.89	0.96	4.22	0.28	8.67	0.03	1.27	0.84		4.97	0.27	15.17	12.06	2.32	2.19		14.48	24.86	50.36	452.04	306.87	1342.78
Mg44411	430					Minc3s00727g16575	IPR000597 Ribosomal protein L3 IPR009000 Translation protein2C beta-barrel domain superfamily	9.98e-65	CE36997	rpl-3	60S ribosomal protein L3	5e-64	P35684	Oryza sativa	60S ribosomal protein L3	2e-67	6.99	0.93	2.08	0.77	8.38	0.02	0.65	0.31		0.27	0.27	3.99	0.27	0.42	0.27		3.11	1.63	1.62	15.87	17.61	61.35
Mg9799	463		NXFT01001514.1.3974_g		6.51e-122	Minc3s00167g06588		2.49e-11									0.25	1	3.22	0.15	8.05	0.01	33.18	45.18		4.97	20.98	0.27	3.81	0.27	0.27		17.32	12.56	15.16	15.87	4.87	4.45
Mg17065	1631		NXFT01002672.1.7045_g	IPR000743 Glycoside hydrolase 2C family 28 IPR006626 Parallel beta-helix repeat IPR011050 Pectin lyase fold/virulence factor IPR012334 Pectin lyase fold	0.0	Minc3s00007g00481	IPR000743 Glycoside hydrolase2C family 28 IPR003961 Fibronectin type III IPR011050 Pectin lyase fold/virulence factor IPR012334 Pectin lyase fold IPR013783 Immunoglobulin-like fold IPR024535 Pectate lyase superfamily protein IPR036116 Fibronectin type III superfamily	4.04e-170					P15922	Erwinia	Exo-poly-alpha-D-galacturonosidase	2e-94	0.01	1	0.2	1	8.05	0.02	3.29	4.62		52.04	80.15	6.79	20.32	0.27	0.27		51.43	80.88	9.74	20.83	1.68	7.8
Mg4572	1172		NXFT01001574.1.4099_g	IPR006201 Neurotransmitter-gated ion-channel IPR006202 Neurotransmitter-gated ion-channel ligand-binding domain IPR018000 Neurotransmitter-gated ion-channel 2C conserved site IPR036719 Neurotransmitter-gated ion-channel transmembrane domain superfamily IPR036734 Neurotransmitter-gated ion-channel ligand-binding domain superfamily	0.0	Minc3s10848g44411		1.24e-60	CE45728	lgc-31	Ligand-Gated ion Channel	1e-30					0.88	1	1.09	0.79	7.79	0.03	14.65	16.2		4.97	6.18	2.13	2.63	0.27	0.27		8.79	11.2	5	4.52	0.97	6.96
Mg43340	236					Minc3s02659g31087	IPR005326 Plectin/S102C N-terminal IPR036388 Winged helix-like DNA-binding domain superfamily IPR037447 40S Ribosomal protein S10	4.82e-14	CE09041	rps-10	40S ribosomal protein S10	2e-13	Q9AYP4	Oryza sativa	40S ribosomal protein S10	2e-22	6.41	0.94	3.06	0.61	7.75	0.02	0.36	0.36		0.27	0.27	2.13	0.27	0.42	0.27		1.69	1.63	2.3	15.16	8.76	41.68
Mg37497	268					Minc3s00354g10841	IPR002143 Ribosomal protein L1 IPR016095 Ribosomal protein L12C 3-layer alpha/beta-sandwich IPR023673 Ribosomal protein L12C conserved site IPR023674 Ribosomal protein L1-like IPR028364 Ribosomal protein L1/ribosomal biogenesis protein	3.55e-31	CE28379	rpl-1	Ribosomal protein	5e-32	O74836	Schizosaccharomyces pombe	60S ribosomal protein L1-B	9e-31	-1.84	0.99	2.66	0.73	7.72	0.03	0.31	0.31		4.97	0.27	0.27	2.63	0.42	0.27		0.27	1.63	1.62	13.03	11.24	38.34
Mg49150	652		NXFT01000171.1.4425_g	IPR001563 Peptidase S10 2C serine carboxypeptidase IPR018202 Serine carboxypeptidase 2C serine active site IPR029058 Alpha/Beta hydrolase fold IPR033124 Serine carboxypeptidases 2C histidine active site	0.0	Minc3s00485g13136	IPR001563 Peptidase S102C serine carboxypeptidase IPR018202 Serine carboxypeptidase2C serine active site IPR029058 Alpha/Beta hydrolase fold	5.53e-43	CE02733		Uncharacterized serine carboxypeptidase F41C3.5	6e-36	Q3AQC2	Chlorobium chlorochromatii	Adenosylhomocysteinase	1e-34	1.25	0.44	2.02	0.13	7.65	0.01	0.34	0.36		127.34	148.2	3.99	13.24	0.27	0.27		305.81	348.68	36.82	28.64	1.68	5.7
Mg2083	170					Minc3s00960g19311	IPR004000 Actin family IPR004001 Actin2C conserved site IPR020902 Actin/actin-like conserved site	4.89e-33	CE28620	act-4	Actin-4	4e-33	P07830	Dictyostelium discoideum	Major actin	5e-33	-0.87	1	5.22	0.25	7.58	0.02	0.29	0.27		4.97	0.27	0.27	1.45	0.42	0.59		0.27	3	4.33	37.15	13.37	77.24
Mg2661	434		NXFT01002964.1.7786_g		8.62e-56	Minc3s00520g13678	IPR001304 C-type lectin-like IPR016186 C-type lectin-like/link domain superfamily IPR016187 C-type lectin fold IPR018378 C-type lectin2C conserved site	1.29e-13									-0.99	0.93	8.39	0.11	7.36	0.02	56.5	41.5		9.68	35.77	0.27	0.27	0.27	0.27		4.53	18.03	4.33	7.36	2.39	3.61
Mg49683	215					Minc3s09457g43222	IPR002674 Ribosomal protein L37ae IPR011331 Ribosomal protein L37ae/L37e IPR011332 Zinc-binding ribosomal protein	2.03e-28	CE22117	rpl-43	60S ribosomal protein L37a	2e-29	Q54UG4	Dictyostelium discoideum	60S ribosomal protein L37a	5e-32	0.68	1	2.84	0.62	7.34	0.01	0.31	0.31		2.62	0.27	2.13	0.27	0.58	0.27		0.27	4.37	5.68	9.49	13.37	55.91
Mg16829	1167		NXFT01004154.1.10814_g		0.0												-0.73	0.8	1.12	0.33	7.11	0	24.89	18.87		59.1	94.95	9.58	9.71	0.27	0.27		45.74	46.72	21.25	20.12	3.1	1.94
Mg1804	550																1.46	0.89	2.44	0.47	6.98	0.03	44.85	34.76		7.33	6.18	0.27	2.63	0.27	0.27		10.21	26.23	4.33	8.07	2.74	1.94
Mg25468	286					Minc3s01153g21227	IPR000626 Ubiquitin domain IPR002906 Ribosomal protein S27a IPR011332 Zinc-binding ribosomal protein IPR019956 Ubiquitin IPR029071 Ubiquitin-like domain superfamily IPR038582 S27a-like superfamily	1.92e-32					P79781	Gallus gallus	Ubiquitin-40S ribosomal protein S27a	2e-25	0.1	1	3.23	0.43	6.82	0.02	0.41	0.31		7.33	3.22	3.06	1.45	0.58	1.23		1.69	9.83	4.33	35.02	22.92	109.88
Mg46729	390					Minc3s00715g16462	IPR000552 Ribosomal protein L44e IPR011332 Zinc-binding ribosomal protein	1.52e-49	CE02131	rpl-36.A	Ribosomal protein rpl-36.A	1e-48	Q55CW5	Dictyostelium discoideum	60S ribosomal protein L36a	1e-48	-2.47	0.92	3.07	0.39	6.65	0.01	0.41	0.31		9.68	6.18	3.99	2.63	1.06	0.27		0.27	3	5.68	47.07	23.28	77.66
Mg9113	1219					Minc3s00127g05433	IPR001580 Calreticulin/calnexin IPR009033 Calreticulin/calnexin2C P domain superfamily IPR009169 Calreticulin IPR013320 Concanavalin A-like lectin/glucanase domain superfamily IPR018124 Calreticulin/calnexin2C conserved site	9.03e-138	CE21562	crt-1	Calreticulin	2e-131	Q9STD3	Chlamydomonas reinhardtii	Calreticulin	7e-153	-8.62	0.69	10.37	0.13	6.63	0.03	12.15	1.4		7.33	6.18	0.27	0.27	0.74	0.59		0.27	0.27	29.37	15.16	71.07	14.91
Mg14860	1487					Minc3s05531g38377	IPR000629 ATP-dependent RNA helicase DEAD-box2C conserved site IPR001650 Helicase2C C-terminal IPR011545 DEAD/DEAH box helicase domain IPR014001 Helicase superfamily 1/22C ATP-binding domain IPR014014 RNA helicase2C DEAD-box type2C Q motif IPR027417 P-loop containing nucleoside triphosphate hydrolase	0.0	CE01341	inf-1	Eukaryotic initiation factor 4A	0.0	P47943	Schizosaccharomyces pombe	ATP-dependent RNA helicase eIF4A	0.0	1.9	0.96	2.82	0.65	6.54	0.03	13.1	0.99		2.62	0.27	2.13	1.45	0.58	0.59		4.53	5.73	15.84	6.65	56.91	5.7
Mg998	1341		NXFT01002345.1.6232_g		7.41e-81												1.52	0.62	2.65	0.11	6.46	0.01	203.07	210.46		66.16	89.03	9.58	32.12	0.27	0.91		199.23	242.11	95.71	157	14.07	28.3
Mg255	413		NXFT01002290.1.6077_g	IPR008597 Invertebrate-type lysozyme	2.98e-45												1.02	0.84	4.08	0.02	5.93	0	1479.5	1488.6		61.5	127.5	12.4	15.6	3.6	0.6		166.5	210.7	188.5	273.3	117.8	147.1
Mg11937	835	SP	NXFT01002136.1.5657_g	IPR001283 Cysteine-rich secretory protein-related IPR014044 CAP domain IPR035940 CAP superfamily	1.17e-141	Minc3s01051g20218	IPR001283 Cysteine-rich secretory protein-related IPR002413 Venom allergen 5-like IPR014044 CAP domain IPR018244 Allergen V5/Tpx-1-related2C conserved site IPR035940 CAP superfamily	8.25e-82	CE44291	vap-2	Venom-Allergen-like Protein	6e-20	Q16937	Ancylostoma	Ancylostoma secreted protein	2e-18	1.38	0.98	5.03	0.02	5.86	0	4.4	3.2		0.3	3.2	3.1	0.3	1.7	0.3		3.1	4.4	43.6	57.7	37.8	63.4
Mg295	349		NXFT01000699.1.1659_g	IPR000175 Sodium:neurotransmitter symporter IPR037272 Sodium:neurotransmitter symporter superfamily	3.81e-108												1.75	0.6	4.54	0	5.84	0	297.8	327		14.4	3.2	4	5	1.8	0.3		24.4	37.2	90.3	105.2	57.3	58.8
Mg647	1006		NXFT01001454.1.3749_g	IPR036908 RlpA-like domain superfamily	0.0	Minc3s00489g13197	IPR036908 RlpA-like domain superfamily	2.39e-47									1.71	0.8	3.05	0.13	5.74	0.01	547.55	330.91		2.62	29.85	7.72	12.06	0.9	0.27		41.48	56.29	57.13	100.27	19.03	27.46
Mg22083	284					Minc3s00362g11006	IPR000626 Ubiquitin domain IPR019954 Ubiquitin conserved site IPR019956 Ubiquitin IPR029071 Ubiquitin-like domain superfamily	4.00e-53	CE31915	ubq-1	Ubiquitin-related	1e-48	P0CG83	Hordeum vulgare	Polyubiquitin (Fragment)	5e-51	0.45	1	1.98	0.73	5.64	0.03	8.89	0.87		4.97	0.27	3.06	3.81	0.9	0.91		4.53	3	13.81	11.61	55.85	9.47
Mg613	1476		NXFT01003778.1.867_g	IPR001563 Peptidase S10 2C serine carboxypeptidase IPR029058 Alpha/Beta hydrolase fold	0.0	Minc3s01332g22852	IPR001563 Peptidase S102C serine carboxypeptidase IPR029058 Alpha/Beta hydrolase fold	5.07e-168	CE02733		Uncharacterized serine carboxypeptidase F41C3.5	6e-114	Q20970	Caenorhabditis elegans	Methionyl-tRNA synthetase, cytoplasmic	1e-112	0.71	0.79	3.38	0	5.63	0	154.3	145		153.2	293.2	11.4	13.2	0.6	0.6		351.3	374.6	133.6	116.6	9.5	24.5
Mg692	1885		NXFT01001263.1.270_g	IPR002018 Carboxylesterase 2C type B IPR029058 Alpha/Beta hydrolase fold	0.0	Minc3s05606g38512	IPR002018 Carboxylesterase2C type B IPR019826 Carboxylesterase type B2C active site IPR029058 Alpha/Beta hydrolase fold	0.0	CE07569	ace-1	Acetylcholinesterase 1	8e-41	P37967	Bacillus subtilis	Para-nitrobenzyl esterase	2e-47	1.61	0.84	5.52	0.01	5.43	0	187.8	139.7		7.3	0.3	0.3	1.4	0.3	0.6		13.1	11.2	17.2	32.9	4.9	6.5
Mg1601	464		NXFT01003962.1.943_g		2.33e-126	Minc3s00056g02915		8.23e-11									1.24	0.38	2.23	0.02	5.37	0	173.2	141.3		200.3	305	31	81.7	1.1	1.9		554.5	632.9	267.7	254.2	39.9	52.6
Mg1572	398		NXFT01000796.1.2028_g		4.17e-143												0.7	0.96	2.11	0.38	5.15	0.04	229.03	172.76		106.16	168.91	17.96	30.94	1.37	0.27		193.54	250.31	70.67	136.44	11.24	41.27
Mg506	402		NXFT01002106.1.5431_g		4.33e-123												2.34	0.27	4.35	0	5.06	0	195.9	150.3		9.7	6.2	4	0.3	0.9	0.3		40.1	39.9	34.1	50.6	11.6	17.4
Mg39	306																0.61	0.96	3.64	0.06	4.96	0.01	387.24	346.63		44.98	118.62	2.13	10.88	1.22	0.91		132.43	112.31	62.54	84.66	16.2	37.92
Mg618	2352		NXFT01001538.1.3995_g		8.21e-48	Minc3s00381g11350	IPR002213 UDP-glucuronosyl/UDP-glucosyltransferase	1.12e-87									2.1	0.06	3.46	0	4.93	0	163.3	186		37.9	35.8	5.9	12.1	1.2	0.3		150.9	164.2	78.1	108.8	20.8	17.8
Mg920	826					Minc3s04771g36974	IPR009009 RlpA-like protein2C double-psi beta-barrel domain IPR036908 RlpA-like domain superfamily	1.57e-68									1.28	0.68	4.05	0.01	4.91	0	123.2	122.8		12	15.1	2.1	0.3	0.6	0.3		27.3	37.2	19.2	15.9	4.2	9.9
Mg583	2093		NXFT01001574.1.4100_g		0.0	Minc3s00020g01299		8.04e-94									1.28	0.49	3.4	0.01	4.84	0	551.5	593		56.7	94.9	11.4	15.6	2.8	0.9		153.8	209.3	118.7	158.4	35	70.1
Mg394	373		NXFT01000573.1.1298_g	IPR019383 Golgin subfamily A member 7/ERF4 IPR039735 Cysteine-rich hydrophobic domain-containing protein 1/2	2.41e-120												0.99	0.51	3.46	0	4.84	0	314.6	232.9		346.2	405.6	11.4	26.2	0.7	1.9		736.4	757.2	183	218	19.4	32.9
Mg1044	1164		NXFT01001830.1.4729_g		0.0												1.94	0.35	2.64	0.05	4.75	0	210.2	234.3		23.8	15.1	5.9	13.2	1.1	0.3		44.3	105.5	51.7	61.3	11.6	17.4
Mg268	969		NXFT01003523.1.9192_g	IPR001304 C-type lectin-like IPR016186 C-type lectin-like/link domain superfamily IPR016187 C-type lectin fold	3.99e-102												0.56	0.96	1.47	0.36	4.69	0.01	229.76	230.56		108.52	195.54	17.03	43.92	1.37	0.27		214.86	229.81	82.85	82.54	14.43	23.69
Mg5949	305																0.62	0.92	2.11	0.09	4.63	0	51.97	36.06		63.8	47.61	7.72	2.63	0.27	0.91		96.9	75.42	23.96	20.83	6.99	5.29
Mg238	2906		NXFT01001514.1.3974_g		0.0	Minc3s01195g21596		3.04e-19									0.55	0.96	2.11	0.08	4.57	0	92.56	94.07		21.45	38.73	4.92	9.71	0.9	0.27		24.43	61.75	30.05	30.05	9.47	11.14
Mg1071	2069	SP				Minc3s02310g29381	IPR008597 Invertebrate-type lysozyme IPR023346 Lysozyme-like domain superfamily	1.76e-14									7.71	0.83	4.94	0.06	4.48	0.05	19.53	29.54		0.27	0.27	0.27	2.63	0.27	1.23		1.69	5.73	27.34	39.98	8.41	9.47
Mg105	1007		NXFT01003523.1.9190_g	IPR001304 C-type lectin-like IPR016186 C-type lectin-like/link domain superfamily IPR016187 C-type lectin fold	2.93e-168	Minc3s01112g20836	IPR001304 C-type lectin-like IPR016186 C-type lectin-like/link domain superfamily IPR016187 C-type lectin fold	1.31e-27									-0.17	1	1.47	0.6	4.4	0.04	1294.68	1808.64		350.9	867.18	65.46	153.65	3.91	0.91		472.09	608.29	275.78	326.51	36.38	68.46
Mg1385	1196		NXFT01001454.1.3748_g		0.0	Minc3s00489g13197	IPR036908 RlpA-like domain superfamily	1.48e-30									1.11	0.8	2.98	0.07	4.39	0.02	297.74	160.51		301.48	322.77	18.89	52.18	1.53	0.91		624.15	717.6	229.07	320.13	13.01	32.06
Mg923	1045		NXFT01001057.1.2761_g	IPR036908 RlpA-like domain superfamily	0.0	Minc3s02154g28582	IPR036908 RlpA-like domain superfamily	2.68e-27									1.14	0.75	3.68	0.02	4.39	0.01	600.5	389.6		99.1	192.6	15.2	10.9	1.7	0.9		283.1	355.5	121.4	210.2	13.7	35.4
Mg5376	222																1.47	0.89	3.67	0.06	4.39	0.01	58.81	55.7		2.62	6.18	2.13	0.27	0.42	0.91		7.37	15.3	13.13	13.74	5.58	9.89
Mg764	445																2.24	0.05	11.29	0	4.37	0	473.1	358.4		12	9.1	0.3	0.3	0.7	0.3		45.7	53.6	42.2	41.4	6.6	7.4
Mg3769	454		NXFT01004069.1.10651_g		4.86e-133	Minc3s01125g20957		9.07e-20									2.09	0.78	2.9	0.11	4.37	0.01	201.61	178.18		4.97	0.27	2.13	2.63	0.74	0.27		5.95	16.66	12.45	19.42	4.16	9.89
Mg20	1197		NXFT01001951.1.5038_g	IPR001130 TatD family IPR001304 C-type lectin-like IPR016186 C-type lectin-like/link domain superfamily IPR016187 C-type lectin fold IPR018378 C-type lectin 2C conserved site IPR032466 Metal-dependent hydrolase	0.0	Minc3s00272g09117	IPR001304 C-type lectin-like IPR016186 C-type lectin-like/link domain superfamily IPR016187 C-type lectin fold IPR018378 C-type lectin2C conserved site	1.40e-15									0.34	1	1.89	0.16	4.35	0	2391.85	2084.86		339.14	748.83	84.09	131.23	6.44	6.03		578.68	791.38	308.27	484.66	84.53	160.92
Mg82	1046		NXFT01001951.1.5036_g	IPR001304 C-type lectin-like IPR016186 C-type lectin-like/link domain superfamily IPR016187 C-type lectin fold IPR018378 C-type lectin 2C conserved site	0.0	Minc3s00066g03327	IPR001304 C-type lectin-like IPR016186 C-type lectin-like/link domain superfamily IPR016187 C-type lectin fold IPR018378 C-type lectin2C conserved site	8.71e-12									0.32	1	2.44	0.28	4.32	0.05	929.6	898.71		127.34	245.84	17.03	56.9	3.59	0.59		179.33	284.47	175.59	214.45	31.42	55.91
Mg149	1264		NXFT01002979.1.7840_g		0.0												0.42	0.96	2.06	0.07	4.28	0	2290.06	1943.81		1744.03	2956.04	166.98	389.62	9.29	7.96		3101.22	3174.29	1096.23	1209.49	133.39	196.48
Mg4841	441		NXFT01004283.1.11150_g	IPR001606 ARID DNA-binding domain IPR021906 SWI/SNF-like complex subunit BAF250/Osa IPR033388 SWI/SNF-like complex subunit BAF250 2C C-terminal IPR036431 ARID DNA-binding domain superfamily	5.55e-18												1.66	0.16	3.5	0	4.25	0	300.7	251.5		54.4	35.8	5.9	5	1.2	0.3		129.6	157.4	65.3	53.5	9.1	15.3
Mg341	824		NXFT01002632.1.6954_g	IPR001919 Carbohydrate-binding type-2 domain IPR008965 CBM2/CBM3 2C carbohydrate-binding domain superfamily IPR012291 CBM2 2C carbohydrate-binding domain superfamily IPR019028 Carbohydrate binding domain CBM49	0.0	Minc3s01081g20527	IPR001547 Glycoside hydrolase2C family 5 IPR008965 CBM2/CBM32C carbohydrate-binding domain superfamily IPR012291 CBM22C carbohydrate-binding domain superfamily IPR017853 Glycoside hydrolase superfamily IPR019028 Carbohydrate binding domain CBM49	7.90e-16									0.84	0.6	2.7	0	4.22	0	1393	1118.8		268.5	219.2	34.7	47.5	4.5	1.5		409.6	462.1	206.1	323.7	53.7	61.8
Mg8458	679		NXFT01000093.1.2434_g	IPR016137 RGS domain IPR036305 RGS domain superfamily	0.0	Minc3s01980g27565	IPR016137 RGS domain IPR036305 RGS domain superfamily	2.92e-60	CE31774	rgs-3	Regulator of G-protein signaling rgs-3	4e-17	Q18312	Caenorhabditis elegans	Regulator of G-protein signaling rgs-3	1e-15	3	0.6	0.39	0.96	4.22	0.03	22.65	23.33		2.62	0.27	3.99	4.99	0.58	0.59		5.95	15.3	7.71	3.81	5.22	7.8
Mg1375	444																0.22	1	2.21	0.06	4.16	0	279.11	210.84		28.51	26.89	5.85	1.45	1.22	0.59		32.95	31.69	14.48	19.42	8.76	18.26
Mg631	557		NXFT01000805.1.2060_g		1.19e-15												-0.42	1	4.65	0.05	4.14	0.01	573.7	511.7		21.4	23.9	3.1	0.3	2	0.6		14.5	19.4	23.3	55.6	14.8	29.1
Mg693	1938		NXFT01004135.1.985_g	IPR001139 Glycoside hydrolase family 30 IPR001286 Glycoside hydrolase 2C family 59 IPR017853 Glycoside hydrolase superfamily	0.0	Minc3s03089g32729	IPR001139 Glycoside hydrolase family 30 IPR013780 Glycosyl hydrolase2C all-beta IPR017853 Glycoside hydrolase superfamily IPR033452 Glycosyl hydrolase family 302C beta sandwich domain IPR033453 Glycosyl hydrolase family 302C TIM-barrel domain	2.96e-79	CE26698	gba-3	Putative glucosylceramidase 3	4e-14	Q45070	Bacillus subtilis	Glucuronoxylanase xynC	2e-41	1.14	0.5	3.8	0	4.08	0	315.2	202.9		416.8	381.9	29.1	66.3	3.4	3.8		907	855.6	539.8	768.4	39.9	73.5
Mg172	257																1.02	0.83	3.11	0.06	4.08	0.02	368.12	265.15		47.33	115.66	5.85	7.35	1.22	0.27		116.8	207.95	40.88	68.35	10.53	11.14
Mg148	1075		NXFT01003237.1.766_g	IPR003146 Carboxypeptidase 2C activation peptide IPR036990 Metallocarboxypeptidase-like 2C propeptide	7.43e-100	Minc3s02685g31187		2.07e-19									1.32	0.35	3.39	0	4.06	0	2034.8	1647.7		303.8	408.6	32.9	68.7	16.1	10.5		921.2	858.3	374.6	676.9	214.5	230.4
Mg1733	712		NXFT01003663.1.9573_g	IPR013783 Immunoglobulin-like fold IPR036179 Immunoglobulin-like domain superfamily	0.0	Minc3s06943g40519	IPR013783 Immunoglobulin-like fold IPR036179 Immunoglobulin-like domain superfamily	5.19e-90	CE04757	zig-12	2 (Zwei) IG domain protein	7e-12					0.46	0.79	2.02	0	4.05	0	281.9	231.7		125	192.6	33.8	30.9	4.4	6		200.6	232.5	141.1	120.8	77.1	83.5
Mg10053	1148		NXFT01004154.1.10811_g		3.62e-113												-0.59	0.96	0.31	0.93	4	0.04	4.89	2.67		124.99	115.66	7.72	36.84	0.58	0.59		108.27	52.19	32.76	20.83	5.93	5.29
Mg3662	989		NXFT01001660.1.4281_g		0.0	Minc3s00160g06399		4.60e-46									2.5	0.56	1.61	0.52	3.98	0.03	62.45	57.63		4.97	0.27	6.79	2.63	0.58	0.27		14.48	15.3	7.71	20.83	3.81	3.61
Mg2037	478																1.41	0.43	3.36	0.01	3.98	0	327.7	473		21.4	32.8	4.9	6.2	1.5	0.3		81.3	60.4	47.7	60.6	11.6	14.9
Mg2060	2247		NXFT01002396.1.6539_g	IPR000743 Glycoside hydrolase 2C family 28 IPR003961 Fibronectin type III IPR006626 Parallel beta-helix repeat IPR011050 Pectin lyase fold/virulence factor IPR012334 Pectin lyase fold IPR013783 Immunoglobulin-like fold IPR036116 Fibronectin type III superfamily	0.0	Minc3s00861g18203	IPR000743 Glycoside hydrolase2C family 28 IPR003961 Fibronectin type III IPR011050 Pectin lyase fold/virulence factor IPR012334 Pectin lyase fold IPR013783 Immunoglobulin-like fold IPR036116 Fibronectin type III superfamily	7.18e-178					P15922	Erwinia	Exo-poly-alpha-D-galacturonosidase	8e-93	1.12	0.69	3.72	0.02	3.96	0.01	179.9	91.2		136.8	177.8	4	14.4	1.2	0.9		310.1	373.3	86.9	140	9.5	17.8
Mg8087	714		NXFT01003033.1.7975_g		6.09e-124												0.88	0.96	2.46	0.21	3.89	0.01	15.15	12.09		9.68	3.22	7.72	0.27	3.12	2.51		8.79	15.3	20.57	23.67	39.92	37.5
Mg203	1743		NXFT01003813.1.9877_g		0.0												1.49	0.69	2.4	0.19	3.88	0.02	586.09	564.5		33.21	89.03	16.1	20.32	4.38	0.91		125.33	210.68	86.24	102.39	28.94	52.14
Mg3675	284																0.69	0.78	3.39	0	3.88	0	171.2	118.1		59.1	97.9	3.1	5	0.6	0.3		129.6	120.5	32.8	44.9	2.7	4.4
Mg11	1252		NXFT01003035.1.7996_g	IPR000210 BTB/POZ domain IPR011333 SKP1/BTB/POZ domain superfamily	0.0	Minc3s04036g35327	IPR000210 BTB/POZ domain IPR008974 TRAF-like IPR011333 SKP1/BTB/POZ domain superfamily	1.65e-161	CE00124	bath-42	BTB and MATH domain-containing protein 42	3e-44	Q99832	Homo sapiens	T-complex protein 1 subunit eta	6e-43	-0.17	1	1.07	0.51	3.86	0	56.5	66.22		35.57	35.77	13.3	25.04	0.9	1.87		34.37	28.96	29.37	49.91	8.06	22.44
Mg1392	585					Minc3s05725g38721		5.73e-59									0.33	0.92	2.38	0	3.83	0	222.4	236.1		68.5	103.8	17	20.3	1.5	2.2		105.4	109.6	90.3	101.7	22.9	21.2
Mg1577	482		NXFT01000730.1.1754_g		1.97e-92	Minc3s00249g08561		5.31e-12									1.19	0.22	2.86	0	3.74	0	248	212.3		101.5	163	18.9	26.2	2.6	0.9		308.7	289.9	153.9	167.6	18.3	28.3
Mg23	683																0.82	0.69	3.02	0	3.68	0	528.5	474.1		33.2	41.7	2.1	8.5	1.5	1.2		60	71.3	33.4	44.9	11.2	19.5
Mg93	888		NXFT01004063.1.10629_g		0.0	Minc3s00991g19646		4.52e-36									0.9	0.92	2.01	0.3	3.61	0.03	892.42	713.99		155.58	115.66	20.76	54.54	8.5	2.51		239.02	269.44	143.78	153.46	40.98	97.74
Mg1167	1344		NXFT01001189.1.3042_g		0.0												4.58	0.03	3.09	0	3.58	0	61.9	68.1		2.6	3.2	5.9	9.7	6.1	2.8		48.6	78.1	89.6	36.4	61.5	44.6
Mg133	4100		NXFT01002871.1.7527_g	IPR006028 Gamma-aminobutyric acid A receptor/Glycine receptor alpha IPR006029 Neurotransmitter-gated ion-channel transmembrane domain IPR006201 Neurotransmitter-gated ion-channel IPR036719 Neurotransmitter-gated ion-channel transmembrane domain superfamily	0.0	Minc3s00782g17286	IPR006028 Gamma-aminobutyric acid A receptor/Glycine receptor alpha IPR006029 Neurotransmitter-gated ion-channel transmembrane domain IPR006201 Neurotransmitter-gated ion-channel IPR006202 Neurotransmitter-gated ion-channel ligand-binding domain IPR018000 Neurotransmitter-gated ion-channel2C conserved site IPR036719 Neurotransmitter-gated ion-channel transmembrane domain superfamily IPR036734 Neu…	0.0	CE29908	lgc-46	Probable ligand-gated ion channel 46	1e-118	P41849	Caenorhabditis elegans	Ligand-gated ion channel 50	1e-53	0.59	0.94	3.99	0.01	3.57	0.01	1977.5	1452		61.5	118.6	18.9	22.7	7.5	6.4		94.1	172.4	209.4	442.1	70	91.5
Mg1857	1066		NXFT01001222.1.3114_g	IPR017853 Glycoside hydrolase superfamily	0.0	Minc3s05621g38543	IPR001547 Glycoside hydrolase2C family 5 IPR017853 Glycoside hydrolase superfamily	1.71e-71					P10475	Bacillus subtilis	Endoglucanase	2e-20	2	0.51	3.98	0.03	3.56	0.02	632.6	572.5		28.5	15.1	7.7	12.1	4.2	0.9		50	126	120.8	179	29.7	32.9
Mg724	2054		NXFT01003508.1.9148_g		0.0	Minc3s00100g04556	IPR036259 MFS transporter superfamily	1.76e-109	CE31258			3e-15					1.4	0.77	0.22	1	3.56	0.01	22.46	16.76		12.03	12.1	3.99	4.99	0.9	0.91		24.43	38.52	2.3	8.07	8.06	7.8
Mg709	787		NXFT01004122.1.10785_g		1.14e-111	Minc3s00960g19313		1.17e-12									0.03	1	1.49	0.5	3.52	0.01	52.85	40.95		9.68	23.94	5.85	4.99	0.74	0.91		5.95	27.59	13.13	16.58	6.28	6.96
Mg95	693		NXFT01000888.1.2240_g	IPR002701 Chorismate mutase II 2C prokaryotic-type IPR019425 7TM GPCR 2C serpentine receptor class t (Srt) IPR036263 Chorismate mutase type II superfamily	0.0	Minc3s01325g22793	IPR002701 Chorismate mutase II2C prokaryotic-type IPR036263 Chorismate mutase type II superfamily	2.42e-74									0.65	0.97	4.73	0.04	3.5	0.03	717.2	588.1		42.6	23.9	2.1	7.3	6.8	2.5		37.2	68.6	64.6	161.3	43.5	63
Mg2322	1655		NXFT01004046.1.10573_g		1.28e-24	Minc3s00272g09105		1.48e-67									-0.28	1	0.56	0.78	3.44	0	102.63	72.94		70.86	109.74	18.89	30.94	1.22	0.27		72.74	75.42	40.88	31.47	6.28	7.8
Mg448	1109	SP	NXFT01003523.1.9191_g	IPR001304 C-type lectin-like IPR016186 C-type lectin-like/link domain superfamily IPR016187 C-type lectin fold	0.0	Minc3s00202g07456	IPR001304 C-type lectin-like IPR016186 C-type lectin-like/link domain superfamily IPR016187 C-type lectin fold	2.28e-33									0.19	1	1.82	0.05	3.43	0	379.91	255.52		82.63	142.29	13.3	17.96	1.53	1.55		112.54	142.37	40.21	68.35	9.47	19.09
Mg7672	2317		NXFT01001485.1.3884_g	IPR002110 Ankyrin repeat IPR012338 Beta-lactamase/transpeptidase-like IPR015868 Glutaminase IPR020683 Ankyrin repeat-containing domain IPR036770 Ankyrin repeat-containing domain superfamily IPR041541 Glutaminase 2C EF-hand domain	0.0	Minc3s01063g20340	IPR002110 Ankyrin repeat IPR012338 Beta-lactamase/transpeptidase-like IPR015868 Glutaminase IPR020683 Ankyrin repeat-containing domain IPR036770 Ankyrin repeat-containing domain superfamily IPR041541 Glutaminase2C EF-hand domain	0.0	CE28902	glna-2	Putative glutaminase 2	0.0	Q19013	Caenorhabditis elegans	Putative glutaminase DH11.1	0.0	-0.37	1	2.6	0.25	3.41	0.03	18.77	22.44		4.97	12.1	2.13	2.63	2.48	0.91		3.11	9.83	16.51	9.49	13.01	19.93
Mg325	4188	SP	NXFT01004291.1.11196_g	IPR001547 Glycoside hydrolase 2C family 5 IPR017853 Glycoside hydrolase superfamily IPR018087 Glycoside hydrolase 2C family 5 2C conserved site	0.0	Minc3s00708g16378	IPR007588 Zinc finger2C FLYWCH-type IPR018289 MULE transposase domain	2.06e-174					P07103	Dickeya dadantii	Endoglucanase Z	8e-22	1.43	0.59	3.01	0.05	3.41	0.01	1929.9	1343.1		108.5	112.7	26.3	49.8	16.4	9.2		254.7	339.1	178.3	424.4	108.6	164.7
Mg851	574		NXFT01003643.1.9514_g		2.79e-156												2.25	0.01	3.42	0	3.35	0	202.8	207.9		45	26.9	17	18	18.5	14		176.5	168.3	235.2	132.9	181.2	148.8
Mg6600	1378		NXFT01000331.1.8710_g	IPR004843 Calcineurin-like phosphoesterase domain 2C ApaH type	0.0	Minc3s00383g11373	IPR004843 Calcineurin-like phosphoesterase domain2C ApaH type IPR029052 Metallo-dependent phosphatase-like	8.84e-63	CE09190			1e-21	Q12287	Saccharomyces cerevisiae	Cytochrome c oxidase copper chaperone	1e-21	0.96	0.69	1.67	0.13	3.31	0.01	17.1	9.39		75.57	41.69	9.58	12.06	0.74	0.91		92.64	136.9	23.28	44.24	4.16	7.38
Mg1953	464																0.34	0.94	1.2	0.07	3.28	0	101.82	85.41		670.94	787.29	79.43	160.73	2.48	3.79		949.6	895.22	315.72	233.6	23.99	30.39
Mg3908	540		NXFT01003123.1.8134_g	IPR007110 Immunoglobulin-like domain IPR013098 Immunoglobulin I-set IPR013783 Immunoglobulin-like fold IPR036179 Immunoglobulin-like domain superfamily	3.39e-155	Minc3s01999g27675	IPR007110 Immunoglobulin-like domain IPR013098 Immunoglobulin I-set IPR013783 Immunoglobulin-like fold IPR036179 Immunoglobulin-like domain superfamily	1.64e-69	CE04757	zig-12	2 (Zwei) IG domain protein	4e-16					0.13	1	2.63	0.01	3.16	0	183.2	144.7		40.3	41.7	10.5	2.6	1.5	0.9		40.1	49.5	42.9	39.3	7.3	12
Mg2129	631	SP	NXFT01000452.1.112_g	IPR002544 FMRFamide-related peptide-like	6.48e-173	Minc3s01318g22714	IPR002544 FMRFamide-related peptide-like	1.41e-73									0.33	0.91	1.58	0	3.14	0	301.29	337.94		162.64	248.8	41.25	53.36	5.97	6.03		266.02	250.31	145.13	135.73	46.29	55.91
Mg7263	757		NXFT01000493.1.1154_g	IPR000719 Protein kinase domain IPR011009 Protein kinase-like domain superfamily	0.0	Minc3s00332g10371	IPR000719 Protein kinase domain IPR011009 Protein kinase-like domain superfamily	1.37e-48									-0.66	0.92	0.22	0.96	3.1	0.01	31.49	21.47		96.75	109.74	4.92	21.5	1.06	0.91		69.9	60.39	11.77	18	4.87	8.63
Mg4796	746		NXFT01002974.1.7817_g	IPR001878 Zinc finger 2C CCHC-type IPR002059 Cold-shock protein 2C DNA-binding IPR011129 Cold shock domain IPR012340 Nucleic acid-binding 2C OB-fold IPR036875 Zinc finger 2C CCHC-type superfamily	0.0	Minc3s01345g22963	IPR001878 Zinc finger2C CCHC-type IPR002059 Cold-shock protein2C DNA-binding IPR011129 Cold shock domain IPR012340 Nucleic acid-binding2C OB-fold IPR036875 Zinc finger2C CCHC-type superfamily	6.06e-55	CE24880	lin-28	Protein lin-28	3e-20	P91599	Caenorhabditis remanei	Protein lin-28	2e-19	0.62	0.87	1.61	0.05	3.09	0	68.07	70.63		40.27	89.03	9.58	22.68	3.91	4.11		102.59	93.18	45.62	49.91	31.07	33.32
Mg925	1819		NXFT01000831.1.2085_g	IPR001506 Peptidase M12A IPR006026 Peptidase 2C metallopeptidase IPR024079 Metallopeptidase 2C catalytic domain superfamily	0.0	Minc3s00138g05784	IPR001506 Peptidase M12A IPR003582 ShKT domain IPR006026 Peptidase2C metallopeptidase IPR024079 Metallopeptidase2C catalytic domain superfamily IPR034035 Astacin-like metallopeptidase domain	0.0	CE03479	nas-10	Zinc metalloproteinase nas-10	3e-64	Q21388	Caenorhabditis elegans	Zinc metalloproteinase nas-10	4e-63	1.21	0.07	2.16	0	3.09	0	416.5	348.1		73.2	74.2	34.7	40.4	12.1	8.6		158	182	151.2	182.5	75	100.7
Mg1559	1578		NXFT01002206.1.5847_g	IPR001079 Galectin 2C carbohydrate recognition domain IPR013320 Concanavalin A-like lectin/glucanase domain superfamily	0.0	Minc3s06855g40399	IPR001079 Galectin2C carbohydrate recognition domain IPR013320 Concanavalin A-like lectin/glucanase domain superfamily	9.29e-178	CE29634	lec-5	Galectin	1e-106	O44126	Haemonchus contortus	32 kDa beta-galactoside-binding lectin	2e-40	-0.52	1	2.91	0.17	3.08	0.04	39.8	47.28		16.74	18.02	2.13	1.45	1.85	0.27		14.48	9.83	12.45	11.61	6.64	9.89
Mg670	840					Minc3s01245g22044		4.15e-39									0.44	0.75	1.71	0	3.06	0	332.7	255.06		242.65	248.8	58.01	61.62	6.44	6.03		334.24	333.65	222.3	168.35	40.98	60.09
Mg3194	765		NXFT01001951.1.5035_g	IPR001304 C-type lectin-like IPR016186 C-type lectin-like/link domain superfamily IPR016187 C-type lectin fold IPR018378 C-type lectin 2C conserved site	0.0	Minc3s00066g03326	IPR001304 C-type lectin-like IPR016186 C-type lectin-like/link domain superfamily IPR016187 C-type lectin fold IPR018378 C-type lectin2C conserved site	1.50e-96									0.59	0.96	1.13	0.63	3.06	0.03	115.42	87.6		49.68	47.61	5.85	20.32	1.06	1.23		52.85	93.18	17.19	37.85	4.87	10.31
Mg324	2282		NXFT01001967.1.5083_g	IPR013078 Histidine phosphatase superfamily 2C clade-1 IPR029033 Histidine phosphatase superfamily	0.0	Minc3s03017g32444	IPR013078 Histidine phosphatase superfamily2C clade-1 IPR029033 Histidine phosphatase superfamily	8.48e-154	CE29367			2e-14					1.48	0.49	5.02	0	3.05	0.02	79.1	52		12	21	1.2	0.3	0.6	0.9		48.6	41.3	16.5	18.7	2.4	5.7
Mg622	706		NXFT01001453.1.3747_g		1.66e-129												0.18	1	1.44	0.39	3.04	0.05	101.75	55.13		447.39	592.01	30.07	67.52	2.96	1.87		567.31	612.39	114.67	145.66	10.89	27.46
Mg3591	1786		NXFT01002041.1.5291_g	IPR001296 Glycosyl transferase 2C family 1 IPR028098 Glycosyltransferase subfamily 4-like 2C N-terminal domain	3.82e-30	Minc3s00003g00181	IPR001296 Glycosyl transferase2C family 1 IPR028098 Glycosyltransferase subfamily 4-like2C N-terminal domain	3.32e-123									1.38	0.8	0.6	0.81	3.04	0.03	47.21	33.1		9.68	18.02	5.85	8.53	1.85	0.27		31.53	38.52	11.77	9.49	8.41	7.8
Mg449	693	SP	NXFT01001170.1.319_g	IPR008965 CBM2/CBM3 2C carbohydrate-binding domain superfamily	0.0												2.17	0.03	3.69	0	2.99	0	764	714		68.5	89	11.4	23.9	7.9	5.1		304.4	397.9	181.7	257.7	42	60.5
Mg5	152		NXFT01000427.1.5610_g		5.74e-73	Minc3s03837g34949		2.26e-15									0.21	0.92	2.05	0	2.99	0	2284.6	2211		136.8	166	43.1	42.7	9.9	8.6		176.5	173.8	176.3	176.9	76	68.5
Mg97	1103		NXFT01000852.1.2150_g	IPR000327 POU-specific domain IPR001356 Homeobox domain IPR009057 Homeobox-like domain superfamily IPR010982 Lambda repressor-like 2C DNA-binding domain superfamily IPR013847 POU domain IPR017970 Homeobox 2C conserved site	0.0	Minc3s00170g06674	IPR000327 POU-specific domain IPR001356 Homeobox domain IPR009057 Homeobox-like domain superfamily IPR010982 Lambda repressor-like2C DNA-binding domain superfamily IPR013847 POU domain IPR017970 Homeobox2C conserved site	2.25e-69	CE45098			1e-38	P13528	Caenorhabditis elegans	Transcription factor unc-86	2e-36	-0.05	1	0.58	0.79	2.97	0.02	32.8	33.97		35.57	26.89	10.51	13.24	1.85	0.27		34.37	26.23	19.22	15.87	6.99	8.63
Mg982	656					Minc3s00294g09597		7.80e-29									0.23	1	1.34	0.05	2.97	0	225.76	158.37		70.86	41.69	15.17	17.96	2.17	1.55		69.9	63.12	42.91	39.98	15.49	11.14
Mg415	542																1.21	0.03	2.45	0	2.97	0	603.9	685.5		89.7	97.9	31.9	32.1	8.7	11.5		196.4	236.6	158	190.3	79.9	72.2
Mg3280	267		NXFT01000135.1.3438_g		1.39e-76	Minc3s03561g34198		9.19e-29									1.37	0.64	2.47	0.06	2.95	0	41.85	35.48		9.68	6.18	3.99	1.45	3.12	2.51		18.74	22.13	13.81	15.16	19.38	21.18
Mg6280	1042		NXFT01000999.1.19_g	IPR008907 P25-alpha IPR011992 EF-hand domain pair	1.97e-110	Minc3s00371g11170	IPR008907 P25-alpha IPR011992 EF-hand domain pair IPR030795 Tubulin polymerisation-promoting protein family member 3	1.97e-67	CE08527	tppp-1	Tubulin polymerization-promoting protein homolog	4e-30	P91127	Caenorhabditis elegans	TPPP family protein C32E8.3	5e-29	0.52	1	1.37	0.46	2.94	0.01	37.23	32.98		7.33	18.02	5.85	9.71	2.48	1.23		17.32	18.03	26.67	12.32	14.07	12.4
Mg1050	784		NXFT01000246.1.6598_g	IPR003677 Domain of unknown function DUF148	0.0	Minc3s04115g35517	IPR003677 Domain of unknown function DUF148	9.22e-50									0.27	1	1.18	0.17	2.94	0	619.24	437.72		63.8	68.32	21.69	23.86	5.81	2.51		65.64	93.18	44.27	58.42	24.7	40.01
Mg3584	2213		NXFT01002979.1.7843_g		0.0	Minc3s01195g21596		8.02e-31									-0.11	1	0.9	0.78	2.91	0.04	24.27	26.38		14.39	23.94	3.06	7.35	0.9	0.91		14.48	20.76	9.07	9.49	3.81	6.54
Mg2811	332		NXFT01000446.1.103_g	IPR002544 FMRFamide-related peptide-like	9.75e-129	Minc3s00616g15157	IPR002544 FMRFamide-related peptide-like	6.10e-28									0.33	0.96	0.94	0.36	2.91	0	162.67	154.88		66.16	100.86	13.3	38.02	2.8	3.79		111.12	97.28	53.07	42.82	20.8	24.11
Mg4779	2322		NXFT01001480.1.3872_g	IPR003280 Two pore domain potassium channel IPR013099 Potassium channel domain	0.0	Minc3s00890g18560	IPR003280 Two pore domain potassium channel IPR013099 Potassium channel domain	0.0	CE35702	twk-8	TWiK family of potassium channels	9e-71	Q9PU36	Gallus gallus	Protein piccolo (Fragment)	8e-16	0.1	1	0.91	0.2	2.88	0	85.55	85.94		89.69	94.95	57.08	26.22	5.33	4.11		98.33	100.01	86.91	71.19	33.19	34.57
Mg188	716		NXFT01003921.1.10234_g		0.0	Minc3s00520g13678	IPR001304 C-type lectin-like IPR016186 C-type lectin-like/link domain superfamily IPR016187 C-type lectin fold IPR018378 C-type lectin2C conserved site	2.66e-31									0.87	0.56	1.36	0.08	2.86	0	722.96	635.39		82.63	91.99	25.41	34.48	1.69	0.91		108.27	209.32	59.16	93.17	10.18	6.96
Mg1117	357		NXFT01002795.1.7320_g	IPR002347 Short-chain dehydrogenase/reductase SDR IPR020904 Short-chain dehydrogenase/reductase 2C conserved site IPR036291 NAD(P)-binding domain superfamily	2.99e-114												0.38	1	3.83	0	2.84	0	331.1	319		14.4	9.1	2.1	1.4	2.2	1.2		10.2	20.8	14.5	30.8	12.3	10.3
Mg3292	3176		NXFT01004154.1.10808_g		0.0	Minc3s00899g18665	IPR000162 GPCR2C family 32C metabotropic glutamate receptor IPR000337 GPCR2C family 3 IPR001828 Receptor2C ligand binding region IPR011500 GPCR2C family 32C nine cysteines domain IPR017978 GPCR family 32C C-terminal IPR028082 Periplasmic binding protein-like I IPR038550 GPCR2C family 32C nine cysteines domain superfamily	0.0	CE31736			0.0	Q14831	Homo sapiens	Metabotropic glutamate receptor 7	7e-156	0.07	1	1.22	0.09	2.82	0	84.48	109.89		84.98	53.52	21.69	14.42	2.8	1.87		77.01	69.95	44.27	39.98	13.72	17.42
Mg7521	395					Minc3s00342g10606		9.34e-25									0.99	0.92	0.67	0.79	2.79	0.05	62.9	48.41		19.09	23.94	20.76	2.63	2.17	0.91		52.85	31.69	15.16	22.96	8.41	11.56
Mg338	570		NXFT01003587.1.9376_g	IPR002544 FMRFamide-related peptide-like	0.0	Minc3s01847g26723	IPR002544 FMRFamide-related peptide-like	4.29e-30	CE07264	flp-7	TPMQRSSMVRF-amide 2	1e-18					0.24	0.92	1.23	0	2.79	0	512.42	441.52		539.16	467.75	172.56	137.13	17.84	16.61		614.2	576.86	365.81	363.39	100.11	136.23
Mg166	892		NXFT01000052.1.1194_g		1.20e-166	Minc3s00271g09102		3.13e-20									0.3	0.94	1.8	0	2.79	0	532.4	430.57		179.11	177.79	39.38	43.92	9.45	5.71		243.28	195.65	138.36	150.62	40.63	64.28
Mg2639	548		NXFT01000301.1.7989_g	IPR000253 Forkhead-associated (FHA) domain IPR008984 SMAD/FHA domain superfamily IPR011011 Zinc finger 2C FYVE/PHD-type IPR011124 Zinc finger 2C CW-type IPR013083 Zinc finger 2C RING/FYVE/PHD-type IPR019787 Zinc finger 2C PHD-finger	5.38e-19	Minc3s01639g25273		6.26e-18									-0.14	1	0.98	0.71	2.78	0.04	88.25	78.04		61.45	29.85	20.76	7.35	0.74	2.83		31.53	52.19	25.31	30.76	9.83	8.63
Mg2759	586		NXFT01001335.1.321_g		7.11e-53												2.53	0.1	10.47	0	2.76	0.04	52.6	23.4		19.1	9.1	0.3	0.3	0.6	0.9		71.3	93.2	21.9	25.8	3.8	2.8
Mg706	781		NXFT01003829.1.9920_g		6.88e-104	Minc3s02833g31727		1.62e-22									0.4	0.76	1.3	0	2.74	0	630.58	540.89		492.1	414.49	99.92	108.81	11.51	10.2		574.41	626.05	256.15	255.59	55.5	88.12
Mg1467	1081		NXFT01002213.1.5889_g	IPR036908 RlpA-like domain superfamily	8.89e-159	Minc3s00489g13197	IPR036908 RlpA-like domain superfamily	3.49e-40									0.68	0.7	3.42	0	2.73	0	415.7	325.3		96.7	121.6	7.7	6.2	3.4	1.9		138.1	210.7	57.8	87.5	13.4	21.2
Mg12109	152		NXFT01000427.1.5610_g		5.74e-73												-0.22	1	2.53	0.03	2.72	0.01	2843.5	1772.1		221.5	166	47.8	26.2	14	9.9		150.9	182	152.6	276.2	63.3	94.4
Mg3216	457		NXFT01001705.1.442_g		4.62e-173	Minc3s02323g29460		3.36e-49									0.87	0.77	2.04	0.05	2.69	0	322.1	247.1		122.6	44.6	30.1	16.8	6	7.3		179.3	131.4	86.9	106.6	31.4	50.5
Mg757	502																0.69	0.77	2.15	0.01	2.68	0	184	147.2		80.3	130.5	26.3	23.9	13.1	6		148.1	190.2	107.2	113.7	75.3	48
Mg736	642																-0.21	1	1.08	0.62	2.67	0.01	36.47	35.31		12.03	20.98	8.65	6.17	1.22	1.55		11.64	16.66	17.19	13.74	8.41	6.12
Mg2738	203																0.34	0.93	0.83	0.23	2.65	0	109.89	108.08		66.16	100.86	31	53.36	5.02	5.71		113.96	95.91	77.44	70.48	31.78	32.48
Mg4811	320		NXFT01003885.1.10137_g		3.72e-58												-0.1	1	1.23	0.4	2.65	0.05	94.39	42.39		734.48	929.31	45.9	82.86	2.32	4.11		825.96	725.8	171.53	127.22	13.72	22.02
Mg1434	3004		NXFT01002418.1.612_g	IPR019425 7TM GPCR 2C serpentine receptor class t (Srt)	3.21e-162	Minc3s00376g11252	IPR019425 7TM GPCR2C serpentine receptor class t (Srt)	4.00e-53									-0.23	0.96	0.75	0.26	2.64	0	97.72	65.31		179.11	204.42	22.62	30.94	2.32	2.19		159.44	166.96	46.3	42.82	13.72	11.98
Mg4650	1419		NXFT01002233.1.5940_g	IPR001304 C-type lectin-like IPR016186 C-type lectin-like/link domain superfamily IPR016187 C-type lectin fold IPR018378 C-type lectin 2C conserved site	0.0	Minc3s00134g05648	IPR001304 C-type lectin-like IPR016186 C-type lectin-like/link domain superfamily IPR016187 C-type lectin fold IPR018378 C-type lectin2C conserved site	2.40e-84									-0.14	1	0.14	0.99	2.63	0.02	34.01	20.65		532.1	615.68	44.04	68.7	1.53	1.55		618.47	419.73	78.79	44.24	5.93	10.73
Mg1186	1799		NXFT01003229.1.740_g		0.0	Minc3s00871g18293		6.17e-63									1.35	0.05	1.64	0	2.61	0	920.24	922.95		157.93	284.3	93.4	127.69	37.63	30.71		504.78	617.85	314.37	370.48	227.56	189.36
Mg9651	475		NXFT01001580.1.4122_g	IPR000536 Nuclear hormone receptor 2C ligand-binding domain IPR001628 Zinc finger 2C nuclear hormone receptor-type IPR001723 Nuclear hormone receptor IPR013088 Zinc finger 2C NHR/GATA-type IPR035500 Nuclear hormone receptor-like domain superfamily	2.27e-161	Minc3s00556g14247	IPR000536 Nuclear hormone receptor2C ligand-binding domain IPR001628 Zinc finger2C nuclear hormone receptor-type IPR001723 Nuclear hormone receptor IPR013088 Zinc finger2C NHR/GATA-type IPR035500 Nuclear hormone receptor-like domain superfamily	3.53e-41	CE39696	nhr-64	Nuclear hormone receptor family member nhr-64	4e-18	Q6P8D9	Xenopus tropicalis	NEDD8-conjugating enzyme Ubc12	6e-17	1.06	0.92	1.2	0.71	2.6	0.05	8.53	11.41		4.97	9.14	3.06	8.53	3.75	2.83		11.64	16.66	11.77	13.74	19.03	18.67
Mg262	2503		NXFT01001574.1.4103_g		0.0	Minc3s00083g03980	IPR000276 G protein-coupled receptor2C rhodopsin-like IPR017452 GPCR2C rhodopsin-like2C 7TM IPR019424 Serpentine type 7TM GPCR chemoreceptor Srsx	2.99e-113									0.15	0.96	0.76	0.02	2.59	0	2843.73	2667.54		1866.4	2556.61	641.96	784.87	63.59	71.09		2539.87	2364.05	1254.64	1166.23	368.12	439.12
Mg233	454	SP				Minc3s01054g20252		1.84e-36									0.51	0.96	1.37	0.25	2.57	0.01	168.27	155.14		42.62	53.52	12.37	23.86	2.48	0.91		45.74	90.45	31.41	59.84	9.47	10.31
Mg2584	947		NXFT01001910.1.4921_g	IPR001841 Zinc finger 2C RING-type IPR002172 Low-density lipoprotein (LDL) receptor class A repeat IPR013083 Zinc finger 2C RING/FYVE/PHD-type IPR027370 RING-type zinc-finger 2C LisH dimerisation motif IPR036055 LDL receptor-like superfamily IPR039043 Zinc finger protein-like 1	0.0	Minc3s09202g43008	IPR002172 Low-density lipoprotein (LDL) receptor class A repeat IPR036055 LDL receptor-like superfamily	9.63e-123	CE11412			7e-76	P85831	Apis mellifera	Prohormone-4	7e-45	0.13	1	1.18	0.02	2.57	0	486.58	424.07		209.71	225.13	49.63	63.98	9.13	10.84		227.65	248.94	128.88	126.51	43.11	72.64
Mg707	915		NXFT01001750.1.4516_g	IPR001283 Cysteine-rich secretory protein-related IPR002413 Venom allergen 5-like IPR014044 CAP domain IPR035940 CAP superfamily	0.0	Minc3s00297g09642	IPR001283 Cysteine-rich secretory protein-related IPR002413 Venom allergen 5-like IPR014044 CAP domain IPR018244 Allergen V5/Tpx-1-related2C conserved site IPR035940 CAP superfamily	2.74e-77	CE30944	vap-1	Venom-Allergen-like Protein	2e-34	Q16937	Ancylostoma	Ancylostoma secreted protein	1e-29	9.56	0.09	3.27	0.01	2.57	0.01	10.7	13.4		0.3	0.3	4.9	5	2.5	3.8		11.6	13.9	51	40	20.4	13.7
Mg143	1863		NXFT01000379.1.9902_g	IPR001547 Glycoside hydrolase 2C family 5 IPR017853 Glycoside hydrolase superfamily	0.0	Minc3s00202g07474	IPR001547 Glycoside hydrolase2C family 5 IPR017853 Glycoside hydrolase superfamily IPR018087 Glycoside hydrolase2C family 52C conserved site	1.28e-166					P22541	Butyrivibrio fibrisolvens	Endoglucanase A	2e-34	0.3	1	4.12	0	2.55	0.01	202.8	173		19.1	21	2.1	1.4	1.4	0.9		20.2	29	14.5	40.7	5.9	5.7
Mg1557	472		NXFT01003107.1.8088_g	IPR002544 FMRFamide-related peptide-like	0.0	Minc3s00048g02615	IPR002544 FMRFamide-related peptide-like	2.09e-53									0.16	1	1.22	0.27	2.54	0.01	156.41	133.26		96.75	195.54	53.35	29.76	5.97	2.83		167.96	156.03	95.04	100.27	18.32	33.32
Mg2082	1384		NXFT01002998.1.7899_g	IPR000276 G protein-coupled receptor 2C rhodopsin-like IPR017452 GPCR 2C rhodopsin-like 2C 7TM	0.0	Minc3s01251g22098	IPR000276 G protein-coupled receptor2C rhodopsin-like IPR017452 GPCR2C rhodopsin-like2C 7TM	0.0	CE24056	daf-38	G-protein coupled receptor daf-38	1e-37					0.1	1	2.23	0.12	2.53	0.03	39.3	38.25		26.15	18.02	3.99	4.99	1.22	2.19		17.32	30.33	17.87	22.25	4.16	12.4
Mg24874	1329		NXFT01002553.1.6721_g		0.0												0.92	0.93	0.21	1	2.52	0.05	1.2	1.3		9.68	6.18	15.17	8.53	3.12	3.79		17.32	12.56	15.16	12.32	15.84	21.18
Mg988	8303		NXFT01000999.1.45_g		0.0	Minc3s00029g01782		0.0	CE00072	hsp-12.2	Heat shock protein Hsp-12.2	6e-18	P34328	Caenorhabditis elegans	Heat shock protein Hsp-12.2	1e-16	0.62	0.89	1.68	0.09	2.51	0.01	1306.78	1072.75		1026.29	1589.11	204.23	370.74	63.43	37.44		1771.02	2236.98	822.07	1020.84	245.97	328.68
Mg705	1881		NXFT01003245.1.8444_g	IPR002226 Catalase haem-binding site IPR010582 Catalase immune-responsive domain IPR011614 Catalase core domain IPR018028 Catalase 2C mono-functional 2C haem-containing IPR020835 Catalase superfamily IPR024708 Catalase active site IPR024711 Catalase 2C mono-functional 2C haem-containing 2C clades 1 and 3 IPR037060 Catalase core domain superfamily	0.0	Minc3s00005g00340	IPR002226 Catalase haem-binding site IPR010582 Catalase immune-responsive domain IPR011614 Catalase core domain IPR018028 Catalase2C mono-functional2C haem-containing IPR020835 Catalase superfamily IPR024708 Catalase active site IPR024711 Catalase2C mono-functional2C haem-containing2C clades 1 and 3 IPR037060 Catalase core domain superfamily	0.0	CE22478	ctl-3	Catalase	5e-135	P90682	Ascaris suum	Catalase	3e-140	1	0.44	2	0.02	2.47	0	2438.4	1468		614.5	955.9	142.8	229.2	29.2	20.5		1586.3	1559.3	655.5	829.3	130.6	144.6
Mg8464	1441		NXFT01000999.1.33_g	IPR000276 G protein-coupled receptor 2C rhodopsin-like IPR000611 Neuropeptide Y receptor family IPR017452 GPCR 2C rhodopsin-like 2C 7TM	0.0	Minc3s00123g05270	IPR000276 G protein-coupled receptor2C rhodopsin-like IPR009126 Cholecystokinin receptor IPR017452 GPCR2C rhodopsin-like2C 7TM	0.0	CE38443	ckr-2	CholecystoKinin Receptor homolog	1e-109	P70031	Xenopus laevis	Cholecystokinin receptor	5e-37	0.07	1	0.69	0.78	2.44	0.02	12.08	6.98		42.62	41.69	18.89	9.71	2.17	1.23		42.9	45.36	24.64	21.54	5.93	11.14
Mg6231	2110		NXFT01000040.1.10431_g		0.0	Minc3s02410g29890		0.0	CE31708			7e-14					0.21	1	0.72	0.66	2.43	0	26.7	24.02		28.51	47.61	13.3	17.96	4.38	4.11		51.43	35.79	27.34	23.67	25.05	18.67
Mg1483	951		NXFT01002742.1.7197_g	IPR002048 EF-hand domain IPR011992 EF-hand domain pair IPR018247 EF-Hand 1 2C calcium-binding site	0.0	Minc3s01909g27122	IPR002048 EF-hand domain IPR011992 EF-hand domain pair IPR018247 EF-Hand 12C calcium-binding site IPR028846 Recoverin family	7.98e-139	CE24845	ncs-1	Neuronal calcium sensor 1	6e-115	P36608	Caenorhabditis elegans	Neuronal calcium sensor 1	1e-113	0	1	0.25	0.81	2.39	0	30.39	20.44		148.52	112.7	48.7	45.1	7.87	4.11		128.17	134.17	59.16	52.04	31.42	31.64
Mg742	887		NXFT01000399.1.10521_g		0.0	Minc3s03304g33470		1.94e-14									0.47	0.81	0.57	0.39	2.38	0	617.07	527.63		106.16	65.36	94.33	80.5	16.73	17.89		136.7	102.74	119.41	140.69	99.75	78.08
Mg4679	1776		NXFT01002429.1.635_g	IPR001734 Sodium/solute symporter IPR038377 Sodium/glucose symporter superfamily	0.0	Minc3s02409g29887	IPR001734 Sodium/solute symporter IPR038377 Sodium/glucose symporter superfamily	0.0	CE27109	cho-1	High-affinity choline transporter 1	0.0	O02228	Caenorhabditis elegans	High-affinity choline transporter 1	0.0	0.69	0.92	0.81	0.76	2.36	0.04	46.61	44.82		30.86	12.1	5.85	12.06	1.69	0.91		34.37	35.79	11.1	19.42	5.93	6.12
Mg3212	412		NXFT01000122.1.3117_g		0.0	Minc3s00009g00643		9.43e-48									0.58	0.81	1.42	0.03	2.36	0	254.44	203.72		96.75	71.28	39.38	26.22	8.5	9.24		96.9	154.66	66.61	109.49	43.11	45.45
Mg346	1334		NXFT01003404.1.8934_g		0.0	Minc3s01569g24794		2.29e-84									0.16	1	0.46	0.78	2.33	0.01	174.84	194.04		115.58	151.16	42.18	73.42	5.97	9.88		113.96	181.99	55.1	102.39	30.71	45.03
Mg1690	277		NXFT01003516.1.9166_g		2.88e-133												0.57	0.87	0.85	0.3	2.33	0	146.74	103.68		37.92	59.44	31.93	29.76	6.6	3.47		72.74	69.95	54.42	56.29	27.17	23.28
Mg890	1305		NXFT01002735.1.7146_g		0.0	Minc3s00039g02254		1.20e-26									-0.41	0.96	0.2	0.91	2.31	0	32.61	24.27		120.28	124.53	37.52	67.52	2.8	3.47		94.06	90.45	59.16	60.55	8.41	20.35
Mg57	1594		NXFT01001809.1.4662_g	IPR000720 Peptidylglycine alpha-hydroxylating monooxygenase/peptidyl-hydroxyglycine alpha-amidating lyase IPR001258 NHL repeat IPR011042 Six-bladed beta-propeller 2C TolB-like IPR013017 NHL repeat 2C subgroup	0.0	Minc3s00018g01178	IPR000720 Peptidylglycine alpha-hydroxylating monooxygenase/peptidyl-hydroxyglycine alpha-amidating lyase IPR001258 NHL repeat IPR011042 Six-bladed beta-propeller2C TolB-like IPR013017 NHL repeat2C subgroup	4.18e-44	CE32870	pgal-1	Probable peptidyl-alpha-hydroxyglycine alpha-amidating lyase pgal-1	5e-21	O64203	Mycobacterium phage D29	Gene 10 protein	7e-20	0.16	1	0.81	0.08	2.3	0	840.26	724.41		463.86	521	192.12	184.32	32.72	20.78		599.99	497.62	347.54	311.61	109.31	154.64
Mg1293	3162		NXFT01001714.1.4402_g		0.0	Minc3s00267g08998	IPR000008 C2 domain IPR030537 Synaptotagmin-12 IPR035892 C2 domain superfamily	0.0	CE42451	sue-1	SUppressor of Elongation defect	3e-72					-0.2	1	1.16	0.63	2.28	0.04	33.94	32.71		19.09	44.65	6.79	3.81	2.01	1.87		20.16	34.42	11.1	12.32	5.93	11.14
Mg3061	667					Minc3s06304g39644		1.34e-64									0.37	0.83	0.6	0.22	2.28	0	175.68	143.06		219.12	183.71	89.67	84.04	9.77	8.6		278.81	240.74	137.69	125.09	40.27	47.54
Mg32557	282	SP	NXFT01001848.1.4801_g	IPR004988 Protein of unknown function DUF273	2.67e-19												1.94	0.26	1.42	0.71	2.27	0.02	1.96	1.13		19.09	12.1	2.13	1.45	6.28	5.07		48.59	71.32	3.65	5.23	20.09	33.32
Mg5788	806		NXFT01004217.1.10972_g		0.0	Minc3s00755g16935		4.32e-90									0.09	1	0.82	0.73	2.25	0.03	23.32	21.55		16.74	29.85	13.3	12.06	1.85	1.23		18.74	30.33	17.87	26.51	6.28	6.96
Mg24227	253					Minc3s04129g35549		3.32e-37									1.07	1	1.04	0.67	2.22	0.02	0.48	0.84		0.27	3.22	12.37	4.99	22.43	22.38		4.53	1.63	17.87	18	113.56	93.56
Mg3074	1177		NXFT01003762.1.9774_g	IPR001544 Aminotransferase class IV IPR005786 Branched-chain amino acid aminotransferase II IPR018300 Aminotransferase 2C class IV 2C conserved site IPR033939 Branched-chain aminotransferase IPR036038 Aminotransferase-like 2C PLP-dependent enzymes	0.0	Minc3s03635g34387	IPR001544 Aminotransferase class IV IPR005786 Branched-chain amino acid aminotransferase II IPR018300 Aminotransferase2C class IV2C conserved site IPR033939 Branched-chain aminotransferase IPR036038 Aminotransferase-like2C PLP-dependent enzymes	0.0	CE03457	bcat-1	Branched-chain-amino-acid aminotransferase, cytosolic	3e-143	Q8VEK6	Mus musculus	Inhibitor of growth protein 3	4e-142	1.13	0.83	1.58	0.26	2.2	0.01	15.79	8.35		4.97	18.02	6.79	9.71	14.99	17.89		15.9	31.69	18.54	29.34	82.4	66.37
Mg2716	1009		NXFT01002946.1.7493_g	IPR010300 Cysteine dioxygenase type I IPR011051 RmlC-like cupin domain superfamily IPR014710 RmlC-like jelly roll fold	0.0	Minc3s00266g08991	IPR010300 Cysteine dioxygenase type I IPR011051 RmlC-like cupin domain superfamily IPR014710 RmlC-like jelly roll fold	1.23e-88	CE28465	cdo-1	Cysteine dioxygenase 1	7e-61	Q20893	Caenorhabditis elegans	Cysteine dioxygenase 1	1e-59	1.41	0.18	1.12	0.09	2.2	0	33.09	31.41		26.15	12.1	33.79	26.22	26.86	20.14		45.74	57.65	59.16	71.19	100.81	114.06
Mg1702	1428	SP	NXFT01001253.1.3185_g		7.00e-166	Minc3s01010g19824		5.43e-61	CE12268	nlp-12	Neuropeptide-Like Protein	4e-14					0.07	1	1.4	0.04	2.19	0	238.05	171.75		143.81	148.2	44.04	33.3	9.13	3.79		156.59	149.2	90.98	113.03	26.47	33.73
Mg224	707		NXFT01002197.1.5823_g	IPR000595 Cyclic nucleotide-binding domain IPR014710 RmlC-like jelly roll fold IPR018488 Cyclic nucleotide-binding 2C conserved site IPR018490 Cyclic nucleotide-binding-like	1.47e-35												-0.18	1	0.58	0.68	2.18	0	367.14	243.89		287.36	245.84	93.4	91.12	29.24	14.05		247.55	224.35	105.87	170.48	93.03	104.86
Mg106	3071	SP	NXFT01004300.1.11242_g	IPR000242 PTP type protein phosphatase IPR000387 Tyrosine specific protein phosphatases domain IPR003595 Protein-tyrosine phosphatase 2C catalytic IPR016130 Protein-tyrosine phosphatase 2C active site IPR029021 Protein-tyrosine phosphatase-like IPR033522 Receptor-type tyrosine-protein phosphatase-like N/N2	0.0	Minc3s00061g03119	IPR000242 PTP type protein phosphatase IPR000387 Tyrosine specific protein phosphatases domain IPR003595 Protein-tyrosine phosphatase2C catalytic IPR016130 Protein-tyrosine phosphatase2C active site IPR029021 Protein-tyrosine phosphatase-like	0.0	CE31867	ida-1	Receptor-type tyrosine-protein phosphatase-like ida-1	1e-57	P09446	Caenorhabditis elegans	Heat shock 70 kDa protein A	7e-57	0.29	0.87	1.23	0	2.18	0	3829.31	2636.03		1605.19	1580.23	612.16	495.81	125.02	99.93		2033.94	1863.96	1322.33	1283.25	486.72	529.49
Mg2394	2757		NXFT01002682.1.7089_g	IPR001873 Epithelial sodium channel	0.0	Minc3s00129g05506	IPR001873 Epithelial sodium channel	0.0	CE43784	del-6	DEgenerin Like	1e-131					-0.94	0.92	0.4	0.78	2.16	0	274.06	259.66		7.33	20.98	27.27	21.5	3.59	4.11		4.53	9.83	28.7	35.73	14.07	18.26
Mg503	2038		NXFT01004158.1.10821_g		0.0	Minc3s05078g37554		8.65e-33									-0.22	0.96	-0.25	0.79	2.15	0	118.71	88.95		332.08	426.32	139.04	131.23	4.22	6.03		359.82	288.57	126.18	101.68	18.68	24.11
Mg11408	242		NXFT01003033.1.7967_g		6.06e-45												0.22	1	2.04	0.03	2.15	0.05	17.6	11.6		127.3	154.1	4.9	9.7	1.4	0.6		175.1	151.9	34.1	23	2.7	5.3
Mg1209	2459		NXFT01000162.1.4231_g		0.0	Minc3s02423g29950	IPR000644 CBS domain	3.55e-141									0.44	0.92	1.76	0.01	2.14	0	155.84	180.1		52.04	35.77	21.69	32.12	24.65	16.93		59.95	60.39	105.87	73.32	104.35	78.92
Mg616	1176		NXFT01001530.1.414_g		6.62e-66	Minc3s00198g07337		1.45e-18									1.08	0.68	0.88	0.63	2.14	0.01	180.73	201.5		35.57	9.14	15.17	15.6	3.27	4.11		35.79	61.75	24.64	31.47	10.53	19.93
Mg1508	1683		NXFT01001215.1.3090_g	IPR000008 C2 domain IPR035892 C2 domain superfamily	0.0	Minc3s01542g24578	IPR000008 C2 domain IPR028699 Synaptotagmin-11 IPR035892 C2 domain superfamily	0.0	CE30456	snt-4	SyNapTotagmin	2e-39	Q9H2B2	Homo sapiens	Synaptotagmin-4	4e-35	0.12	0.97	1.14	0	2.12	0	1456.71	1187.55		1111	1071.33	311.33	285.79	53.94	47.05		1198.3	1176.69	687.36	630.05	218	219.9
Mg1169	2758		NXFT01001569.1.3546_g	IPR000239 GPCR kinase IPR000719 Protein kinase domain IPR000961 AGC-kinase 2C C-terminal IPR008271 Serine/threonine-protein kinase 2C active site IPR011009 Protein kinase-like domain superfamily IPR016137 RGS domain IPR017441 Protein kinase 2C ATP binding site IPR036305 RGS domain superfamily	0.0	Minc3s00195g07237	IPR000239 GPCR kinase IPR000719 Protein kinase domain IPR000961 AGC-kinase2C C-terminal IPR011009 Protein kinase-like domain superfamily	0.0	CE01554	grk-1	G protein-coupled receptor kinase 1	2e-143	P34947	Homo sapiens	G protein-coupled receptor kinase 5	3e-151	-0.08	1	1.07	0.01	2.12	0	229.43	258.15		207.35	248.8	65.46	60.44	11.19	12.76		230.49	199.75	133.62	130.76	50.54	51.31
Mg599	2049		NXFT01002127.1.5619_g		1.80e-118	Minc3s00778g17225		5.81e-19									0.44	0.83	0.9	0.1	2.12	0	214.71	166.89		452.09	378.98	145.55	131.23	28.13	15.01		646.89	483.95	262.92	252.75	96.21	92.31
Mg634	859		NXFT01003980.1.10410_g		0.0	Minc3s00509g13498		1.03e-70									-0.08	1	0.46	0.37	2.11	0	959.56	713.94		581.52	600.89	251.73	196.12	34.46	31.35		609.94	507.18	334	282.54	142.95	139.58
Mg4352	1616		NXFT01001208.1.263_g	IPR000615 Bestrophin IPR021134 Bestrophin/UPF0187	0.0	Minc3s00778g17226	IPR000615 Bestrophin IPR021134 Bestrophin/UPF0187	0.0	CE47806	best-22	Bestrophin homolog	1e-178	Q23369	Caenorhabditis elegans	Uncharacterized protein ZC518.1	1e-175	-0.05	1	2.22	0.02	2.09	0.01	52.2	57.5		23.8	12.1	8.6	5	8.8	5.7		14.5	20.8	31.4	31.5	33.5	27.5
Mg464	1082		NXFT01003885.1.10137_g		0.0	Minc3s00056g02892	IPR000352 Peptide chain release factor class I/class II IPR019438 Queuosine salvage protein family	3.55e-58	CE45582			8e-25	O02108	Caenorhabditis elegans	Probable Hsp90 co-chaperone cdc37	6e-12	-0.22	1	0.8	0.63	2.08	0.04	220.93	98.77		1880.52	2092.09	157.66	206.74	8.34	10.52		1898.93	1505.98	381.38	250.62	32.13	45.45
Mg316	2019		NXFT01000620.1.1445_g	IPR000834 Peptidase M14 2C carboxypeptidase A	0.0	Minc3s00641g15504	IPR000834 Peptidase M142C carboxypeptidase A IPR008969 Carboxypeptidase-like2C regulatory domain superfamily IPR015567 Peptidase M14B2C caboxypeptidase D	1.82e-82	CE09156	egl-21	Carboxypeptidase E	5e-52	A5A6K7	Pan troglodytes	Carboxypeptidase E	1e-61	0.12	0.96	0.97	0	2.08	0	2728.93	2544.97		1139.24	1166.01	378.39	375.46	65.49	66.92		1277.88	1224.51	784.16	696.72	271.46	286.42
Mg1500	2195		NXFT01001569.1.3548_g	IPR001736 Phospholipase D/Transphosphatidylase IPR025202 Phospholipase D-like domain IPR032803 PLD-like domain	0.0	Minc3s00793g17439	IPR001736 Phospholipase D/Transphosphatidylase IPR032803 PLD-like domain	0.0	CE19209			8e-89	Q5FVH2	Rattus norvegicus	Phospholipase D3	4e-44	-0.43	1	1.28	0.46	2.07	0.03	24.23	22.44		28.51	23.94	8.65	12.06	8.34	9.88		7.37	31.69	19.22	30.05	28.94	45.87
Mg5815	1554		NXFT01001994.1.5154_g	IPR002554 Protein phosphatase 2A 2C regulatory B subunit 2C B56 IPR011989 Armadillo-like helical IPR016024 Armadillo-type fold	0.0	Minc3s00144g05956	IPR002554 Protein phosphatase 2A2C regulatory B subunit2C B56 IPR011989 Armadillo-like helical IPR016024 Armadillo-type fold	0.0	CE32003	pptr-1	Serine\/threonine-protein phosphatase 2A regulatory subunit pptr-1	1e-72	Q6GV12	Mus musculus	3-ketodihydrosphingosine reductase	9e-71	0.15	1	2.65	0.01	2.06	0.01	37.8	27.4		52	44.6	6.8	12.1	25.1	33.9		58.5	49.5	30.7	82.5	93.7	149.6
Mg4686	1789		NXFT01002932.1.7683_g	IPR000845 Nucleoside phosphorylase domain IPR010059 Uridine phosphorylase 2C eukaryotic IPR035994 Nucleoside phosphorylase superfamily	0.0	Minc3s01425g23717	IPR000845 Nucleoside phosphorylase domain IPR010059 Uridine phosphorylase2C eukaryotic IPR035994 Nucleoside phosphorylase superfamily	2.59e-117	CE34466	upp-1	Uridine and thymidine phosphorylase	2e-48	O95045	Homo sapiens	Uridine phosphorylase 2	2e-44	-0.7	0.51	0.89	0.06	2.06	0	21.77	21.11		59.1	68.32	49.63	45.1	55.99	44.17		38.64	39.89	81.5	93.88	221.54	194.8
Mg10620	1601		NXFT01003642.1.9510_g	IPR000276 G protein-coupled receptor 2C rhodopsin-like IPR009126 Cholecystokinin receptor IPR017452 GPCR 2C rhodopsin-like 2C 7TM	0.0	Minc3s04715g36862	IPR000276 G protein-coupled receptor2C rhodopsin-like IPR009126 Cholecystokinin receptor IPR017452 GPCR2C rhodopsin-like2C 7TM	2.39e-163	CE38443	ckr-2	CholecystoKinin Receptor homolog	2e-120	P70031	Xenopus laevis	Cholecystokinin receptor	7e-39	-0.15	1	0.89	0.64	2.05	0.02	69.72	61.31		14.39	47.61	14.24	12.06	3.43	3.47		23	31.69	23.28	25.09	10.53	16.58
Mg2400	2064		NXFT01001400.1.3602_g	IPR004944 Cyclin-dependent kinase 5 activator IPR036915 Cyclin-like superfamily	0.0	Minc3s05609g38517	IPR004944 Cyclin-dependent kinase 5 activator IPR036915 Cyclin-like superfamily	4.56e-89	CE01096	cdka-1	Cyclin-dependent kinase 5 activator 1	9e-20	Q22695	Caenorhabditis elegans	Cyclin-dependent kinase 5 activator 1	4e-17	0.42	0.96	1.45	0.19	2.04	0.02	103.56	109.6		54.39	59.44	8.65	21.5	5.17	3.15		71.32	80.88	22.61	57	17.26	16.58
Mg2142	1038		NXFT01003181.1.8287_g		8.71e-144	Minc3s01253g22119		3.91e-37									1.32	0.3	10.82	0	2.04	0.01	113.5	91.7		16.7	18	0.3	0.3	1.8	2.8		50	35.8	32.8	27.9	8.8	8.2
Mg2066	410		NXFT01002164.1.5716_g		2.19e-76	Minc3s00248g08527		3.72e-12									0.62	0.92	1.31	0.21	2.03	0.01	107.39	74.96		23.8	18.02	7.72	13.24	3.12	3.79		34.37	30.33	21.25	29.34	9.47	17
Mg5439	961		NXFT01000701.1.1668_g	IPR003280 Two pore domain potassium channel IPR013099 Potassium channel domain	0.0	Minc3s00107g04784	IPR003280 Two pore domain potassium channel IPR013099 Potassium channel domain	1.93e-163	CE38354	twk-29	TWiK family of potassium channels	6e-76	P02640	Gallus gallus	Villin-1	4e-23	0.35	0.96	0.64	0.68	2.02	0	49.59	40.01		61.45	59.44	31.93	23.86	5.02	2.83		77.01	76.78	46.3	40.69	10.53	21.18
Mg777	858		NXFT01002749.1.7227_g		0.0	Minc3s03091g32733		3.93e-32									-0.09	1	1.23	0.03	2.01	0	142.95	99.01		132.05	151.16	37.52	34.48	11.19	7.32		140.96	124.6	83.53	84.66	42.4	32.06
Mg4471	682	SP	NXFT01004084.1.10696_g		0.0	Minc3s00958g19291		1.14e-101									0.03	1	0.36	0.8	2.01	0.01	38.11	65.6		35.57	38.73	14.24	27.4	3.59	3.15		31.53	43.99	23.28	29.34	12.66	13.24
Mg2981	1401		NXFT01000470.1.1073_g		0.0	Minc3s05993g39154		1.71e-31									0.61	0.82	1.13	0.11	2.01	0	233.22	187.06		70.86	47.61	43.11	23.86	10.72	9.56		69.9	112.31	83.53	64.1	44.52	35.83
Mg5160	3100		NXFT01004081.1.10685_g	IPR011021 Arrestin-like 2C N-terminal IPR011022 Arrestin C-terminal-like domain IPR014752 Arrestin 2C C-terminal IPR014756 Immunoglobulin E-set	0.0	Minc3s00674g15933	IPR011021 Arrestin-like2C N-terminal IPR011022 Arrestin C-terminal-like domain IPR014752 Arrestin2C C-terminal IPR014756 Immunoglobulin E-set	1.11e-160	CE07648	cth-2	Putative cystathionine gamma-lyase 2	2e-84	P55216	Caenorhabditis elegans	Putative cystathionine gamma-lyase 2	4e-83	0.23	1	0.66	0.66	2.01	0.01	35.13	26.62		56.74	83.11	117.61	100.55	159.37	162.74		45.74	116.41	137.01	208.78	654.54	637.43
Mg1153	2801		NXFT01002906.1.7607_g	IPR000971 Globin IPR009050 Globin-like superfamily IPR012292 Globin/Protoglobin	0.0	Minc3s02882g31951	IPR000971 Globin IPR009050 Globin-like superfamily IPR012292 Globin/Protoglobin	0.0	CE40742	glb-8	GLoBin related	2e-18					-0.95	0.53	1.17	0.25	2	0.01	123.76	145.44		84.98	83.11	11.44	13.24	3.91	1.55		51.43	35.79	25.99	28.64	8.06	14.07
Mg805	2622		NXFT01000734.1.1876_g		0.0	Minc3s00032g01949		0.0	CE24368			5e-31	Q968A5	Caenorhabditis elegans	GDP-fucose transporter	5e-23	-0.04	1	0.45	0.79	2	0.04	39.18	41.96		16.74	18.02	13.3	12.06	2.17	3.47		11.64	22.13	15.16	19.42	12.66	7.8
Mg6769	2833		NXFT01001972.1.5121_g	IPR000219 Dbl homology (DH) domain IPR002602 Domain of unknown function DB IPR026817 Guanine nucleotide exchange factor Ect2 IPR035899 Dbl homology (DH) domain superfamily	0.0	Minc3s00273g09136	IPR000219 Dbl homology (DH) domain IPR026817 Guanine nucleotide exchange factor Ect2 IPR035899 Dbl homology (DH) domain superfamily	0.0	CE41634			2e-36	Q9H8V3	Homo sapiens	Protein ECT2	2e-29	0	1	-0.84	0.6	-2.03	0	8.1	6.5		12.03	6.18	14.24	21.5	108.4	101.85		8.79	9.83	7.04	13.03	29.3	22.44
Mg3376	1961		NXFT01002477.1.6584_g	IPR002153 Transient receptor potential channel 2C canonical IPR005821 Ion transport domain IPR012674 Calycin	0.0	Minc3s00024g01512	IPR012674 Calycin	0.0	CE31627	lpr-4	LiPocalin-Related protein	9e-151					-0.12	1	0.36	0.79	-2.05	0	9.13	8.62		12.03	6.18	14.24	8.53	267.98	236.45		10.21	7.1	15.84	13.74	65.06	57.16
Mg8995	2633		NXFT01002057.1.510_g	IPR013087 Zinc finger C2H2-type IPR036236 Zinc finger C2H2 superfamily	0.0	Minc3s01125g20954	IPR013087 Zinc finger C2H2-type IPR036236 Zinc finger C2H2 superfamily	2.75e-146	CE45652	lin-29	abnormal cell LINeage	4e-84	Q9VI93	Drosophila melanogaster	Zinc finger protein rotund	1e-67	0.66	0.98	0.76	0.78	-2.05	0.03	7.98	12.01		4.97	6.18	8.65	3.81	65.97	64.68		5.95	11.2	13.13	8.07	11.6	20.35
Mg16641	11875		NXFT01004184.1.10877_g	IPR000152 EGF-type aspartate/asparagine hydroxylation site IPR000421 Coagulation factor 5/8 C-terminal domain IPR000436 Sushi/SCR/CCP domain IPR000742 EGF-like domain IPR000859 CUB domain IPR001304 C-type lectin-like IPR001881 EGF-like calcium-binding domain IPR002172 Low-density lipoprotein (LDL) receptor class A repeat IPR003410 HYR domain IPR008979 Galactose-binding-like domain superfamily IPR…	0.0	Minc3s00039g02277	IPR000152 EGF-type aspartate/asparagine hydroxylation site IPR000421 Coagulation factor 5/8 C-terminal domain IPR000436 Sushi/SCR/CCP domain IPR000742 EGF-like domain IPR000859 CUB domain IPR001304 C-type lectin-like IPR001881 EGF-like calcium-binding domain IPR002172 Low-density lipoprotein (LDL) receptor class A repeat IPR003410 HYR domain IPR008979 Galactose-binding-like domain superfamily IPR…	0.0	CE47765			0.0	P10079	Strongylocentrotus purpuratus	Fibropellin-1	3e-113	0.66	0.92	-0.19	0.94	-2.07	0	16.94	21.52		23.8	6.18	27.27	25.04	156.37	165.95		20.16	28.96	30.05	15.87	45.94	31.22
Mg7185	722		NXFT01002051.1.5363_g		4.50e-165	Minc3s00643g15542		9.78e-138	CE02087	wrt-10	WaRThog (hedgehog-like family)	1e-60					-0.33	1	-1.04	0.78	-2.07	0	3.29	3.4		2.62	3.22	5.85	1.45	231.57	228.12		3.11	1.63	0.94	3.1	56.2	53.82
Mg15010	1790		NXFT01003244.1.8439_g	IPR000719 Protein kinase domain IPR008271 Serine/threonine-protein kinase 2C active site IPR011009 Protein kinase-like domain superfamily	0.0	Minc3s01611g25091	IPR000719 Protein kinase domain IPR003527 Mitogen-activated protein (MAP) kinase2C conserved site IPR008271 Serine/threonine-protein kinase2C active site IPR011009 Protein kinase-like domain superfamily IPR017441 Protein kinase2C ATP binding site	0.0	CE37160	lit-1	Serine\/threonine kinase NLK	6e-163	Q9U9Y8	Caenorhabditis elegans	Serine/threonine kinase NLK	2e-161	0.08	1	0.36	0.91	-2.07	0.03	7.65	8.04		4.97	9.14	11.44	3.81	168.24	130.06		5.95	8.46	5	15.16	49.12	22.02
Mg4321	1971		NXFT01000916.1.2361_g	IPR001930 Peptidase M1 2C alanine aminopeptidase/leukotriene A4 hydrolase IPR014782 Peptidase M1 2C membrane alanine aminopeptidase IPR015211 Peptidase M1 2C leukotriene A4 hydrolase/aminopeptidase C-terminal IPR016024 Armadillo-type fold IPR027268 Peptidase M4/M1 2C CTD superfamily IPR038502 Peptidase M1 LTA-4 hydrolase/aminopeptidase 2C C-terminal domain superfamily	0.0	Minc3s01476g24133	IPR001930 Peptidase M12C alanine aminopeptidase/leukotriene A4 hydrolase IPR014782 Peptidase M12C membrane alanine aminopeptidase IPR015211 Peptidase M12C leukotriene A4 hydrolase/aminopeptidase C-terminal IPR016024 Armadillo-type fold IPR027268 Peptidase M4/M12C CTD superfamily IPR034015 Aminopeptidase2C leukotriene A4 hydrolase-like IPR038502 Peptidase M1 LTA-4 hydrolase/aminopeptidase2C C-term…	0.0	CE24840	ltah-1.1	Aminopeptidase ltah-1.1	3e-177	P09960	Homo sapiens	Leukotriene A-4 hydrolase	7e-155	1	0.87	2.76	0.06	-2.08	0.03	60.52	46.17		19.09	41.69	4.92	7.35	223.81	199.6		25.85	91.81	31.41	47.78	51.96	48.8
Mg6483	1174		NXFT01001863.1.4839_g	IPR002486 Nematode cuticle collagen 2C N-terminal IPR008160 Collagen triple helix repeat	0.0	Minc3s04157g35625		5.36e-69									1.83	0.24	1.38	0.12	-2.08	0	25.68	24.46		9.68	6.18	16.1	6.17	264.34	264.33		23	33.06	23.96	35.02	49.12	76.41
Mg14835	1071		NXFT01001400.1.3601_g	IPR000152 EGF-type aspartate/asparagine hydroxylation site IPR000742 EGF-like domain IPR001881 EGF-like calcium-binding domain IPR003886 NIDO domain IPR009030 Growth factor receptor cysteine-rich domain superfamily IPR013032 EGF-like 2C conserved site IPR018097 EGF-like calcium-binding 2C conserved site	0.0	Minc3s04283g35927	IPR003886 NIDO domain	4.54e-134									9.09	0.18	-0.13	1	-2.08	0.01	4.12	3.32		0.27	0.27	3.99	7.35	71.35	70.77		8.79	9.83	5.68	4.52	19.03	14.91
Mg16482	2507		NXFT01003388.1.8900_g	IPR001507 Zona pellucida domain	0.0	Minc3s01479g24143	IPR001507 Zona pellucida domain	0.0	CE32057	cutl-16	CUTiclin-Like	3e-71	Q03755	Caenorhabditis elegans	Cuticlin-1	7e-36	7.4	0.8	-5	0.78	-2.1	0.01	5.29	4.89		0.27	0.27	1.2	0.27	120.59	91.92		3.11	3	0.27	0.27	26.82	23.28
Mg25335	1000		NXFT01000835.1.2099_g	IPR008160 Collagen triple helix repeat	0.0	Minc3s02222g28952	IPR008160 Collagen triple helix repeat	1.24e-140									0.1	1	7.39	0.2	-2.1	0.01	1.5	1.16		2.62	0.27	0.27	0.27	163.49	146.72		3.11	0.27	1.62	4.52	42.75	29.97
Mg6193	936		NXFT01003269.1.8506_g	IPR036846 GM2-AP 2C lipid-recognition domain superfamily	0.0	Minc3s00828g17833	IPR036846 GM2-AP2C lipid-recognition domain superfamily	0.0	CE02976			3e-103					6.41	0.92	-0.56	0.97	-2.1	0.04	1.41	1.4		0.27	0.27	2.13	0.27	157.16	133.58		3.11	0.27	1.62	0.27	41.34	26.62
Mg2536	1522		NXFT01000632.1.157_g		0.0	Minc3s02513g30410		3.81e-74									-0.07	1	-0.08	1	-2.11	0.02	48.16	57.1		19.09	18.02	7.72	14.42	22.27	15.01		21.58	13.93	9.07	11.61	3.81	5.29
Mg38083	1043		NXFT01002619.1.6919_g	IPR036188 FAD/NAD(P)-binding domain superfamily	0.0	Minc3s01127g20976	IPR002937 Amine oxidase IPR036188 FAD/NAD(P)-binding domain superfamily	0.0	CE38614	glf-1	GaLactoFuranose synthesis	5e-138					0	1	-6.96	0.22	-2.12	0.01	0.89	0.84		0.27	0.27	3.99	0.27	234.89	283.56		0.27	0.27	0.27	0.27	60.45	59.25
Mg3966	1745		NXFT01000717.1.1710_g	IPR012674 Calycin	0.0	Minc3s00163g06480	IPR012674 Calycin	0.0	CE03786	lpr-5	LiPocalin-Related protein	1e-72					8.98	0.2	1.21	0.72	-2.16	0	1.65	1.98		0.27	0.27	2.13	2.63	345.71	340.6		8.79	8.46	5.68	4.52	53.37	100.67
Mg7816	3366		NXFT01000674.1.1571_g		0.0	Minc3s03300g33456		0.0	CE37678			1e-37					1.66	0.93	-0.85	0.2	-2.18	0	14.98	20.25		2.62	0.27	50.56	43.92	361.55	359.19		3.11	5.73	23.96	28.64	82.76	76.83
Mg14895	2754		NXFT01001400.1.3601_g	IPR000152 EGF-type aspartate/asparagine hydroxylation site IPR000742 EGF-like domain IPR001881 EGF-like calcium-binding domain IPR003886 NIDO domain IPR009030 Growth factor receptor cysteine-rich domain superfamily IPR013032 EGF-like 2C conserved site IPR018097 EGF-like calcium-binding 2C conserved site	0.0	Minc3s01520g24451	IPR000152 EGF-type aspartate/asparagine hydroxylation site IPR000742 EGF-like domain IPR001881 EGF-like calcium-binding domain IPR003886 NIDO domain IPR009030 Growth factor receptor cysteine-rich domain superfamily IPR013032 EGF-like2C conserved site IPR018097 EGF-like calcium-binding2C conserved site	0.0	CE44889	dex-1	Dendrite extension defective protein 1	0.0	Q12324	Saccharomyces cerevisiae	Calcium channel YVC1	0.0	-8.91	0.13	-0.4	0.84	-2.19	0	4.82	7.03		4.97	12.1	7.72	7.35	164.44	150.89		0.27	0.27	8.39	3.1	41.69	27.88
Mg16942	1631		NXFT01004200.1.10918_g	IPR001962 Asparagine synthase IPR014729 Rossmann-like alpha/beta/alpha sandwich fold IPR017932 Glutamine amidotransferase type 2 domain IPR029055 Nucleophile aminohydrolases 2C N-terminal	0.0	Minc3s00008g00564	IPR001962 Asparagine synthase IPR006426 Asparagine synthase2C glutamine-hydrolyzing IPR014729 Rossmann-like alpha/beta/alpha sandwich fold IPR017932 Glutamine amidotransferase type 2 domain IPR029055 Nucleophile aminohydrolases2C N-terminal	0.0	CE09642	asns-1	Asparagine synthetase	0.0	Q556R7	Dictyostelium discoideum	Counting factor 50	7e-90	1.44	0.92	-1.73	0.51	-2.21	0.03	9.96	11.41		4.97	0.27	4.92	7.35	90.51	60.51		11.64	3	1.62	2.39	16.55	16.58
Mg15071	2935		NXFT01001626.1.4216_g	IPR002656 Acyltransferase 3 IPR016021 MIF4G-like domain superfamily IPR016024 Armadillo-type fold	0.0	Minc3s04592g36613	IPR002656 Acyltransferase 3	0.0	CE43410	oac-46	O-ACyltransferase homolog	1e-160	Q09225	Caenorhabditis elegans	Nose resistant to fluoxetine protein 6	5e-25	9.97	0.04	0.46	0.79	-2.22	0.01	9.48	9.08		0.27	0.27	5.85	7.35	65.97	55.71		17.32	16.66	9.07	8.78	16.55	9.89
Mg17540	798		NXFT01002224.1.5914_g	IPR000719 Protein kinase domain IPR008271 Serine/threonine-protein kinase 2C active site IPR011009 Protein kinase-like domain superfamily IPR012674 Calycin IPR013126 Heat shock protein 70 family IPR014878 Domain of unknown function DUF1794 IPR017441 Protein kinase 2C ATP binding site	1.93e-114	Minc3s00892g18580	IPR012674 Calycin IPR014878 Domain of unknown function DUF1794	8.84e-130	CE03086			1e-98	Q09244	Caenorhabditis elegans	Uncharacterized protein C28H8.5	3e-26	0.58	1	-0.57	0.82	-2.24	0.05	5.91	6.74		9.68	0.27	9.58	7.35	104.6	57.63		3.11	12.56	5.68	5.94	19.38	15.33
Mg12479	1395		NXFT01002041.1.5287_g	IPR012674 Calycin	0.0	Minc3s00658g15709	IPR012674 Calycin	0.0	CE19004	lpr-3	LiPocalin-Related protein	3e-80					-1.88	0.52	1.16	0.78	-2.28	0	3.89	4.53		19.09	6.18	3.06	0.27	174.26	164.99		4.53	3	2.97	4.52	40.98	29.13
Mg24076	1699		NXFT01003646.1.9521_g	IPR001506 Peptidase M12A IPR006026 Peptidase 2C metallopeptidase IPR024079 Metallopeptidase 2C catalytic domain superfamily	0.0	Minc3s00020g01280	IPR001506 Peptidase M12A IPR006026 Peptidase2C metallopeptidase IPR024079 Metallopeptidase2C catalytic domain superfamily IPR034035 Astacin-like metallopeptidase domain	7.53e-154	CE38034	nas-37	Zinc metalloproteinase nas-37	9e-50	Q93243	Caenorhabditis elegans	Zinc metalloproteinase nas-37	2e-48	0	1	0.42	1	-2.29	0	0.89	0.77		0.27	0.27	2.13	0.27	256.42	250.23		0.27	0.27	1.62	1.68	61.52	42.52
Mg7584	1131		NXFT01002790.1.7306_g		0.0	Minc3s01773g26196		0.0	CE38583			1e-33					-1.46	0.75	-0.29	0.9	-2.29	0.01	27.2	21.33		35.57	9.14	37.52	20.32	390.2	400.53		5.95	11.2	17.87	30.05	59.75	102.76
Mg10735	2864		NXFT01000068.1.1591_g	IPR000731 Sterol-sensing domain IPR003392 Protein patched/dispatched	0.0	Minc3s00131g05579	IPR000731 Sterol-sensing domain IPR003392 Protein patched/dispatched	0.0	CE30905	ptr-4	PaTched Related family	0.0	Q0EEE2	Mus musculus	Patched domain-containing protein 3	1e-52	0.41	1	0.17	0.99	-2.3	0	11.2	6.96		9.68	6.18	11.44	7.35	216.84	221.71		4.53	16.66	9.74	11.61	49.83	39.59
Mg22023	1041		NXFT01001562.1.4062_g	IPR001507 Zona pellucida domain	0.0	Minc3s00027g01722	IPR001507 Zona pellucida domain	7.62e-78	CE40698			8e-38					0.1	1	-0.4	0.81	-2.31	0	7.51	8.72		9.68	6.18	16.1	3.81	177.74	171.4		8.79	8.46	8.39	7.36	36.02	34.99
Mg20153	1039		NXFT01001914.1.4931_g	IPR010480 Pepsin inhibitor-3-like repeated domain IPR038412 Pepsin inhibitor-3 domain superfamily	0.0	Minc3s05314g38002	IPR010480 Pepsin inhibitor-3-like repeated domain IPR038412 Pepsin inhibitor-3 domain superfamily	1.37e-108	CE35593			4e-25	P59704	Trichostrongylus	Aspartyl protease inhibitor	7e-16	0.32	1	-0.49	0.81	-2.31	0.02	5.48	5.68		9.68	6.18	7.72	16.78	65.18	66.28		10.21	9.83	4.33	13.03	17.26	9.47
Mg7455	1281		NXFT01003955.1.926_g	IPR002486 Nematode cuticle collagen 2C N-terminal IPR008160 Collagen triple helix repeat	0.0	Minc3s01822g26528	IPR002486 Nematode cuticle collagen2C N-terminal IPR008160 Collagen triple helix repeat	1.80e-111	CE08889	col-68	Cuticle collagen 68	3e-17	P34804	Caenorhabditis elegans	Cuticle collagen 40	3e-15	-8.93	0.18	-0.72	0.79	-2.33	0.01	9.2	7.82		2.62	15.06	6.79	4.99	116.63	122.68		0.27	0.27	5.68	1.68	27.88	19.93
Mg4531	3860		NXFT01002932.1.7687_g	IPR000152 EGF-type aspartate/asparagine hydroxylation site IPR000742 EGF-like domain IPR001881 EGF-like calcium-binding domain IPR003886 NIDO domain IPR009030 Growth factor receptor cysteine-rich domain superfamily IPR013032 EGF-like 2C conserved site IPR018097 EGF-like calcium-binding 2C conserved site	0.0	Minc3s01425g23712	IPR000152 EGF-type aspartate/asparagine hydroxylation site IPR000742 EGF-like domain IPR001881 EGF-like calcium-binding domain IPR003886 NIDO domain IPR009030 Growth factor receptor cysteine-rich domain superfamily IPR013032 EGF-like2C conserved site IPR018097 EGF-like calcium-binding2C conserved site IPR024731 EGF domain	0.0	CE43273			7e-135	Q75N90	Homo sapiens	Fibrillin-3	3e-29	0.64	0.99	2.55	0.32	-2.34	0.03	11.79	16.61		4.97	12.1	0.27	2.63	69.93	79.1		11.64	13.93	2.97	10.2	11.95	17.84
Mg8414	1580		NXFT01002092.1.5404_g	IPR013320 Concanavalin A-like lectin/glucanase domain superfamily	0.0	Minc3s02767g31488	IPR013320 Concanavalin A-like lectin/glucanase domain superfamily	0.0	CE23634	mlt-9	MoLTing defective	1e-115					0.09	1	3.19	0.17	-2.37	0.01	4.1	4.55		2.62	0.27	1.2	0.27	119	130.38		0.27	3	5.68	4.52	25.05	23.69
Mg24710	2179		NXFT01003329.1.8685_g	IPR003609 PAN/Apple domain	0.0	Minc3s00511g13544	IPR001507 Zona pellucida domain IPR003609 PAN/Apple domain	0.0	CE47472	noah-1	NOmpA Homolog	0.0	Q10125	Caenorhabditis elegans	Uncharacterized protein F52C9.5	4e-21	-6.33	0.92	-6.56	0.36	-2.38	0	1.24	1.78		0.27	3.22	2.13	1.45	282.7	283.88		0.27	0.27	0.27	0.27	74.62	34.15
Mg9047	3482		NXFT01001226.1.267_g	IPR002035 von Willebrand factor 2C type A IPR036465 von Willebrand factor A-like domain superfamily	0.0	Minc3s00128g05489	IPR000717 Proteasome component (PCI) domain IPR036388 Winged helix-like DNA-binding domain superfamily	0.0	CE29189		PCI domain-containing protein 2 homolog	3e-97	O00410	Homo sapiens	Importin-5	4e-96	7.97	0.59	0.76	0.78	-2.39	0.05	7.32	5.66		0.27	0.27	3.99	7.35	40.95	40		3.11	5.73	7.04	11.61	8.41	7.38
Mg7335	847		NXFT01003795.1.9837_g	IPR010480 Pepsin inhibitor-3-like repeated domain IPR038412 Pepsin inhibitor-3 domain superfamily	0.0	Minc3s01946g27354	IPR010480 Pepsin inhibitor-3-like repeated domain IPR038412 Pepsin inhibitor-3 domain superfamily	9.91e-83					P59704	Trichostrongylus	Aspartyl protease inhibitor	3e-13	0.18	1	1.21	0.44	-2.41	0.01	20.82	20.8		23.8	9.14	9.58	7.35	68.82	39.04		24.43	13.93	15.16	23.67	11.24	9.47
Mg17103	2133		NXFT01003628.1.9485_g	IPR001507 Zona pellucida domain IPR001898 Solute carrier family 13 IPR002035 von Willebrand factor 2C type A IPR036465 von Willebrand factor A-like domain superfamily	0.0	Minc3s00681g16015	IPR001507 Zona pellucida domain IPR002035 von Willebrand factor2C type A IPR036465 von Willebrand factor A-like domain superfamily	0.0	CE35746	cut-6	CUTiclin	8e-39	O08746	Mus musculus	Matrilin-2	7e-15	0.92	0.99	3.16	0.25	-2.41	0.03	2.24	3.37		4.97	0.27	0.27	1.45	61.85	79.74		5.95	4.37	4.33	5.94	11.24	15.75
Mg31070	1743		NXFT01001208.1.261_g		0.0	Minc3s01603g25042		0.0	CE15698	tag-297	Temporarily Assigned Gene name	0.0					2.46	0.03	2.97	0	-2.42	0	4.3	3.4		7.3	12.1	2.1	6.2	317.1	318.5		54.3	48.1	28	30.8	61.2	57.6
Mg11686	5854		NXFT01002386.1.6323_g	IPR002919 Trypsin Inhibitor-like 2C cysteine rich domain IPR005018 DOMON domain IPR013032 EGF-like 2C conserved site IPR036084 Serine protease inhibitor-like superfamily	0.0	Minc3s00001g00058	IPR000082 SEA domain IPR002919 Trypsin Inhibitor-like2C cysteine rich domain IPR005018 DOMON domain IPR036084 Serine protease inhibitor-like superfamily	0.0	CE17393			5e-159					-0.14	1	0	1	-2.44	0.02	7.63	9.24		21.45	0.27	13.3	12.06	321.65	292.53		7.37	13.93	15.84	9.49	67.89	45.45
Mg36116	1136		NXFT01001574.1.4092_g	IPR000742 EGF-like domain IPR000859 CUB domain IPR000884 Thrombospondin type-1 (TSP1) repeat IPR001506 Peptidase M12A IPR006026 Peptidase 2C metallopeptidase IPR013032 EGF-like 2C conserved site IPR017050 Metallopeptidase 2C nematode IPR024079 Metallopeptidase 2C catalytic domain superfamily IPR034035 Astacin-like metallopeptidase domain IPR035914 Spermadhesin 2C CUB domain superfamily IPR036383 …	0.0	Minc3s00020g01315	IPR000859 CUB domain IPR000884 Thrombospondin type-1 (TSP1) repeat IPR013032 EGF-like2C conserved site IPR035914 Spermadhesin2C CUB domain superfamily IPR036383 Thrombospondin type-1 (TSP1) repeat superfamily	1.46e-55									6.41	0.92	-0.56	1	-2.44	0.01	1.77	1.37		0.27	0.27	1.2	0.27	123.28	123.01		3.11	0.27	0.94	0.27	21.15	24.53
Mg2100	2094		NXFT01001777.1.4590_g	IPR001590 Peptidase M12B 2C ADAM/reprolysin IPR001765 Carbonic anhydrase IPR024079 Metallopeptidase 2C catalytic domain superfamily IPR036874 Carbonic anhydrase superfamily	0.0	Minc3s01071g20427	IPR001590 Peptidase M12B2C ADAM/reprolysin IPR024079 Metallopeptidase2C catalytic domain superfamily IPR036436 Disintegrin domain superfamily	0.0	CE35421	tag-275		9e-76					-0.31	0.96	0.33	0.79	-2.49	0	21.75	13.39		66.16	41.69	22.62	19.14	205.76	195.43		38.64	49.45	26.67	25.8	34.96	37.08
Mg7657	840		NXFT01003555.1.9285_g	IPR012674 Calycin	0.0	Minc3s04952g37319	IPR012674 Calycin	1.31e-179	CE03785	lpr-6	LiPocalin-Related protein	7e-106					-1.9	0.96	-6.01	0.64	-2.54	0.01	0.77	0.56		0.27	6.18	0.27	2.63	230.14	236.13		0.27	1.63	0.27	0.27	42.4	37.92
Mg2203	5276		NXFT01000544.1.1243_g	IPR019400 Peptidase C65 2C otubain	0.0	Minc3s01625g25189		0.0	CE30193			2e-52					0.82	0.89	1.14	0.21	-2.55	0	29.25	36.4		12.03	12.1	8.65	6.17	151.14	141.59		21.58	20.76	15.84	16.58	19.74	30.81
Mg2540	1791		NXFT01003835.1.9962_g	IPR001296 Glycosyl transferase 2C family 1 IPR028098 Glycosyltransferase subfamily 4-like 2C N-terminal domain	0.0	Minc3s00002g00130	IPR001296 Glycosyl transferase2C family 1 IPR028098 Glycosyltransferase subfamily 4-like2C N-terminal domain	9.37e-157	CE28488	bus-8	Bacterially Un-Swollen	3e-93	Q9DBE8	Mus musculus	Alpha-1,3/1,6-mannosyltransferase ALG2	1e-23	2	0.64	-0.42	0.8	-2.55	0	14.58	9.8		4.97	0.27	9.58	8.53	237.9	265.61		13.06	8.46	7.04	6.65	52.66	33.32
Mg7994	1152		NXFT01001471.1.3852_g		0.0	Minc3s00668g15857		0.0	CE16413			4e-124					-0.03	1	0.49	0.79	-2.56	0	29.28	24.19		9.68	6.18	5.85	4.99	397.33	414.31		5.95	9.83	7.04	8.07	68.95	69.3
Mg284	3681		NXFT01002206.1.5843_g		0.0	Minc3s00580g14581		1.26e-176									0.65	0.99	1.29	0.69	-2.56	0.03	23.3	27.66		7.33	15.06	9.58	0.27	55.36	70.77		17.32	16.66	11.77	13.03	9.83	11.98
Mg15655	1849		NXFT01003936.1.10270_g		0.0	Minc3s00815g17692		2.32e-64									-7.88	0.51	-0.11	1	-2.59	0.02	4.84	3.71		4.97	3.22	5.85	0.27	97.63	105.06		0.27	0.27	1.62	4.52	18.68	15.33
Mg9030	1720		NXFT01003451.1.9013_g	IPR000859 CUB domain IPR001506 Peptidase M12A IPR006026 Peptidase 2C metallopeptidase IPR017050 Metallopeptidase 2C nematode IPR024079 Metallopeptidase 2C catalytic domain superfamily IPR034035 Astacin-like metallopeptidase domain IPR035914 Spermadhesin 2C CUB domain superfamily	0.0	Minc3s00565g14356	IPR000859 CUB domain IPR001506 Peptidase M12A IPR006026 Peptidase2C metallopeptidase IPR017050 Metallopeptidase2C nematode IPR024079 Metallopeptidase2C catalytic domain superfamily IPR034035 Astacin-like metallopeptidase domain IPR035914 Spermadhesin2C CUB domain superfamily	0.0	CE35909	toh-1	Zinc metalloproteinase nas-26	0.0	Q22710	Caenorhabditis elegans	Zinc metalloproteinase nas-26	0.0	0.07	1	1.33	0.43	-2.61	0	11.7	13.79		12.03	18.02	2.13	4.99	112.67	71.09		15.9	15.3	6.36	10.2	16.55	14.07
Mg11578	1310		NXFT01000189.1.4894_g	IPR002486 Nematode cuticle collagen 2C N-terminal IPR008160 Collagen triple helix repeat	0.0	Minc3s00085g04054	IPR002486 Nematode cuticle collagen2C N-terminal IPR008160 Collagen triple helix repeat	3.92e-98	CE45752	col-40	Cuticle collagen 40	1e-23	P34804	Caenorhabditis elegans	Cuticle collagen 40	2e-22	1.42	0.92	0.31	0.93	-2.63	0.02	6.77	4.24		4.97	0.27	8.65	14.42	75.63	46.41		3.11	11.2	15.16	13.03	9.47	10.73
Mg22070	1002		NXFT01002275.1.6005_g	IPR028996 Ganglioside GM2 activator IPR036846 GM2-AP 2C lipid-recognition domain superfamily	0.0	Minc3s03245g33273	IPR028996 Ganglioside GM2 activator IPR036846 GM2-AP2C lipid-recognition domain superfamily	0.0	CE37162	mlt-8	MoLTing defective	1e-162					0.68	1	-0.11	1	-2.63	0	1.41	0.94		4.97	0.27	3.99	9.71	274.95	271.7		3.11	5.73	7.71	4.52	48.06	40.43
Mg6697	2295		NXFT01004234.1.10994_g	IPR004709 Na+/H+ exchanger IPR006153 Cation/H+ exchanger IPR018422 Cation/H+ exchanger 2C CPA1 family	0.0	Minc3s00012g00781	IPR004709 Na+/H+ exchanger IPR006153 Cation/H+ exchanger IPR018422 Cation/H+ exchanger2C CPA1 family	0.0	CE32044	nhx-3	Probable Na(+)\/H(+) antiporter nhx-3	0.0	O16452	Caenorhabditis elegans	Probable Na(+)/H(+) antiporter nhx-3	0.0	1.07	0.92	9.02	0.02	-2.65	0.04	16.2	19.1		7.3	12.1	0.3	0.3	23.7	23.7		24.4	15.3	9.7	8.1	5.9	1.9
Mg8625	1393		NXFT01001470.1.3835_g	IPR006694 Fatty acid hydroxylase	0.0	Minc3s00583g14639	IPR006694 Fatty acid hydroxylase	6.45e-142	CE30592	agmo-1	Alkylglycerol monooxygenase	2e-160	O17554	Caenorhabditis elegans	Alkylglycerol monooxygenase homolog	4e-159	7.4	0.8	0.12	1	-2.69	0.02	2.41	1.66		0.27	0.27	2.13	4.99	73.09	65.64		3.11	3	2.97	4.52	6.64	15.33
Mg22209	2036		NXFT01001804.1.4654_g		0.0	Minc3s00092g04309	IPR031131 Warthog protein 3	0.0	CE33963	wrt-9	WaRThog	1e-78	Q94128	Caenorhabditis elegans	Warthog protein 1	6e-49	-7.33	0.69	0.41	1	-2.7	0.01	1.03	1.25		0.27	6.18	1.2	0.27	138.16	133.26		0.27	0.27	1.62	0.27	21.15	21.18
Mg9161	4363		NXFT01002206.1.5849_g	IPR026767 Transmembrane protein 151	0.0	Minc3s00119g05136	IPR026767 Transmembrane protein 151	4.97e-100	CE31139		Transmembrane protein 151 homolog	2e-96	Q23387	Caenorhabditis elegans	Transmembrane protein 151 homolog	4e-95	-0.12	1	0.15	1	-2.75	0	39.71	36.73		16.74	9.14	10.51	17.96	124.07	125.25		18.74	5.73	15.16	15.87	15.49	22.02
Mg11119	937		NXFT01004003.1.10448_g	IPR006954 Moulting cycle MLT-10-like protein	0.0	Minc3s00279g09273	IPR006954 Moulting cycle MLT-10-like protein	1.14e-110	CE44890	mltn-6	MLt-TeN (mlt-10) related	6e-41					6.99	0.89	-0.1	1	-2.78	0	3.01	1.83		0.27	0.27	7.72	6.17	110.77	142.23		4.53	0.27	5	8.07	19.74	17.42
Mg28014	1499		NXFT01001029.1.2664_g		0.0	Minc3s00376g11245		0.0	CE06465			7e-18					6.41	0.92	-0.16	1	-2.8	0	2.86	1.93		0.27	0.27	3.99	2.63	137.05	132.3		3.11	0.27	2.97	3.1	20.8	18.26
Mg12071	1436		NXFT01000113.1.2971_g	IPR002225 3-beta hydroxysteroid dehydrogenase/isomerase IPR036291 NAD(P)-binding domain superfamily	0.0	Minc3s03875g35043	IPR002225 3-beta hydroxysteroid dehydrogenase/isomerase IPR036291 NAD(P)-binding domain superfamily	0.0	CE20185	hsd-1	HydroxySteroid Dehydrogenase homolog	8e-47	O42706	Schizosaccharomyces pombe	60S ribosomal protein L21-B	7e-56	0.28	1	8.97	0.01	-2.81	0.01	13.9	11.7		5	12.1	0.3	0.3	46.2	43.8		11.6	8.5	8.4	8.8	5.9	7.4
Mg27069	2030		NXFT01000136.1.3473_g	IPR001370 BIR repeat IPR001507 Zona pellucida domain IPR002035 von Willebrand factor 2C type A IPR036465 von Willebrand factor A-like domain superfamily	0.0	Minc3s01359g23114	IPR001507 Zona pellucida domain IPR002035 von Willebrand factor2C type A IPR036465 von Willebrand factor A-like domain superfamily	0.0	CE35746	cut-6	CUTiclin	0.0	Q03755	Caenorhabditis elegans	Cuticlin-1	2e-64	-2.46	0.89	-0.61	0.97	-2.82	0.01	2.31	1.71		4.97	3.22	0.27	2.63	111.25	107.94		0.27	1.63	1.62	0.27	21.15	10.31
Mg582	2436		NXFT01002795.1.7318_g	IPR002486 Nematode cuticle collagen 2C N-terminal	0.0	Minc3s01927g27250	IPR040282 Abnormal cell migration protein 18-like	1.95e-93	CE33613	mig-18	Abnormal cell migration protein 18	1e-28					0.36	0.92	-0.04	1	-2.85	0	109.8	89.57		61.45	65.36	71.05	51	959.67	693.76		84.11	78.15	64.58	54.88	138.34	91.47
Mg5253	1818		NXFT01003867.1.10076_g		5.77e-113	Minc3s02065g28067		6.84e-50									-0.54	0.96	-0.39	0.79	-2.86	0	47.49	37.19		33.21	29.85	35.66	10.88	202.12	173.32		14.48	28.96	19.22	17.29	26.11	26.2
Mg1528	3856		NXFT01001642.1.4238_g		0.0	Minc3s00015g01002	IPR006549 HAD-superfamily hydrolase2Csubfamily IIIA IPR006551 Polynucleotide 3'-phosphatase IPR013954 Polynucleotide kinase 3 phosphatase IPR023214 HAD superfamily IPR036412 HAD-like superfamily	8.85e-90	CE27135			6e-45	Q19683	Caenorhabditis elegans	Uncharacterized protein F21D5.5	9e-44	0.06	1	0.28	0.89	-2.89	0	43.57	54.57		61.45	44.65	40.31	23.86	2769.71	3297.23		37.22	74.05	43.59	35.02	538.41	278.06
Mg14723	3253		NXFT01004169.1.10833_g		0.0	Minc3s00004g00239	IPR003840 DNA helicase IPR010285 DNA helicase Pif1-like IPR027417 P-loop containing nucleoside triphosphate hydrolase	0.0	CE21950		ATP-dependent DNA helicase	4e-56	Q0R4F1	Xenopus laevis	ATP-dependent DNA helicase PIF1	3e-16	1.69	0.84	-1.02	0.73	-2.91	0	15.22	18.49		4.97	0.27	7.72	3.81	113.3	94.8		8.79	8.46	2.97	3.1	16.55	11.56
Mg38303	914		NXFT01000415.1.10870_g	IPR006150 Cysteine-rich repeat IPR028150 Lustrin 2C cysteine-rich repeated	0.0	Minc3s00116g05054	IPR006150 Cysteine-rich repeat IPR028150 Lustrin2C cysteine-rich repeated	1.94e-69	CE30083			5e-12					0	1	0	1	-2.96	0.02	0.65	0.7		0.27	0.27	0.27	0.27	62.8	78.78		0.27	0.27	0.27	0.27	11.6	6.96
Mg14975	8536		NXFT01000396.1.10435_g	IPR002126 Cadherin-like IPR015919 Cadherin-like superfamily IPR020894 Cadherin conserved site	0.0	Minc3s01093g20650	IPR002126 Cadherin-like IPR015919 Cadherin-like superfamily IPR020894 Cadherin conserved site	0.0	CE48069	cdh-12	CaDHerin family	4e-67	Q5DRD3	Pan troglodytes	Protocadherin beta-15	1e-17	8.19	0.76	-0.13	1	-2.97	0.01	4.03	6.19		0.27	0.27	10.51	9.71	300.59	265.61		0.27	9.83	9.74	8.78	29.3	43.78
Mg24936	725		NXFT01000666.1.1553_g	IPR006954 Moulting cycle MLT-10-like protein	1.83e-79	Minc3s00771g17135	IPR006954 Moulting cycle MLT-10-like protein	1.26e-64	CE44911			9e-23					0	1	0	1	-2.97	0.02	0.31	0.46		0.27	0.27	0.27	0.27	79.74	109.87		0.27	0.27	0.27	0.27	15.49	9.05
Mg12023	1294		NXFT01003666.1.10306_g	IPR013087 Zinc finger C2H2-type	0.0	Minc3s01038g20087	IPR007889 DNA binding HTH domain2C Psq-type IPR009057 Homeobox-like domain superfamily	9.90e-35	CE00063	ztf-30	Zinc finger transcription factor family protein 30	2e-11					-0.36	1	0.4	0.96	-3	0.01	2.46	1.93		0.27	6.18	2.13	2.63	83.7	84.55		0.27	4.37	2.97	3.1	9.47	11.98
Mg8682	1001		NXFT01002579.1.6813_g	IPR002602 Domain of unknown function DB IPR012937 Terminal nucleotidyltransferase	0.0	Minc3s00157g06329	IPR002602 Domain of unknown function DB	6.59e-122	CE02569			2e-51					-0.37	1	6.97	0.32	-3.06	0.04	5.46	6.07		0.27	6.18	0.27	0.27	64.07	37.76		1.69	3	2.97	1.68	7.35	5.29
Mg5010	1088		NXFT01002206.1.5851_g	IPR002486 Nematode cuticle collagen 2C N-terminal IPR008160 Collagen triple helix repeat	2.45e-169	Minc3s09078g42905	IPR002486 Nematode cuticle collagen2C N-terminal IPR008160 Collagen triple helix repeat	9.14e-20									0.52	1	-0.86	0.8	-3.06	0.01	3.77	2.19		7.33	0.27	2.13	4.99	181.54	155.69		3.11	8.46	1.62	2.39	11.95	29.13
Mg9518	1191		NXFT01004176.1.10849_g		6.71e-66	Minc3s00088g04195	IPR002486 Nematode cuticle collagen2C N-terminal IPR008160 Collagen triple helix repeat	1.08e-69	CE05707	sqt-3	Cuticle collagen 1	2e-17	P08124	Caenorhabditis elegans	Cuticle collagen 1	3e-16	0.16	1	0.43	0.89	-3.14	0.02	20.22	20.1		30.86	6.18	19.82	4.99	1559.06	1313.86		13.06	30.33	15.16	19.42	187.55	139.58
Mg26928	1303					Minc3s03157g32978	IPR001304 C-type lectin-like IPR016186 C-type lectin-like/link domain superfamily IPR016187 C-type lectin fold IPR018378 C-type lectin2C conserved site	2.26e-158									6.41	0.92	-0.59	0.9	-3.16	0	1.43	1.45		0.27	0.27	2.13	2.63	142.59	108.9		3.11	0.27	1.62	1.68	16.2	12.4
Mg23167	2167		NXFT01001574.1.4092_g	IPR000742 EGF-like domain IPR000859 CUB domain IPR000884 Thrombospondin type-1 (TSP1) repeat IPR001506 Peptidase M12A IPR006026 Peptidase 2C metallopeptidase IPR013032 EGF-like 2C conserved site IPR017050 Metallopeptidase 2C nematode IPR024079 Metallopeptidase 2C catalytic domain superfamily IPR034035 Astacin-like metallopeptidase domain IPR035914 Spermadhesin 2C CUB domain superfamily IPR036383 …	0.0	Minc3s00083g04000	IPR000859 CUB domain IPR000884 Thrombospondin type-1 (TSP1) repeat IPR001506 Peptidase M12A IPR006026 Peptidase2C metallopeptidase IPR013032 EGF-like2C conserved site IPR024079 Metallopeptidase2C catalytic domain superfamily IPR034035 Astacin-like metallopeptidase domain IPR035914 Spermadhesin2C CUB domain superfamily IPR036383 Thrombospondin type-1 (TSP1) repeat superfamily	0.0	CE38034	nas-37	Zinc metalloproteinase nas-37	5e-157	Q93243	Caenorhabditis elegans	Zinc metalloproteinase nas-37	7e-134	0	1	0	1	-3.27	0	0.58	0.65		0.27	0.27	0.27	0.27	101.91	109.87		0.27	0.27	0.27	0.27	13.72	8.63
Mg24056	4694	SP_NLS	NXFT01001574.1.4108_g	IPR010255 Haem peroxidase superfamily IPR019791 Haem peroxidase 2C animal type IPR037120 Haem peroxidase domain superfamily 2C animal type	0.0	Minc3s00020g01287	IPR010255 Haem peroxidase superfamily IPR019791 Haem peroxidase2C animal-type IPR037120 Haem peroxidase domain superfamily2C animal type	0.0	CE43668			0.0	A8WQH2	Caenorhabditis briggsae	Peroxidasin homolog	2e-99	0.63	1	1.82	0.75	-3.29	0.04	1.67	1.59		0.27	6.18	0.27	2.63	48.08	69.17		5.95	3	2.97	5.23	8.76	3.61
Mg38604	1399		NXFT01003596.1.819_g	IPR001124 Lipid-binding serum glycoprotein 2C C-terminal IPR017942 Lipid-binding serum glycoprotein 2C N-terminal IPR017943 Bactericidal permeability-increasing protein 2C alpha/beta domain superfamily IPR032942 BPI/LBP/Plunc family	0.0	Minc3s00244g08413	IPR001124 Lipid-binding serum glycoprotein2C C-terminal IPR017942 Lipid-binding serum glycoprotein2C N-terminal IPR017943 Bactericidal permeability-increasing protein2C alpha/beta domain superfamily IPR032942 BPI/LBP/Plunc family	0.0	CE47349			2e-75					0.09	1	0.21	0.96	-3.31	0	0.46	0.41		2.62	0.27	5.85	7.35	440.39	323.62		0.27	3	7.04	8.07	37.79	39.59
Mg25000	3157		NXFT01003490.1.9098_g	IPR003392 Protein patched/dispatched	0.0	Minc3s00771g17137	IPR000731 Sterol-sensing domain IPR003392 Protein patched/dispatched	0.0	CE46951	ptr-22	PaTched Related family	0.0	Q0EEE2	Mus musculus	Patched domain-containing protein 3	5e-39	-0.6	1	1.6	0.66	-3.34	0.01	1.12	1.06		4.97	6.18	0.27	4.99	97	67.56		3.11	4.37	5	8.78	10.53	6.12
Mg9133	3347		NXFT01002589.1.6838_g	IPR001507 Zona pellucida domain	0.0	Minc3s00076g03727	IPR001507 Zona pellucida domain	1.28e-144	CE41846	cutl-4	CUTiclin-Like	5e-68	Q03755	Caenorhabditis elegans	Cuticlin-1	2e-48	1.1	0.96	-3.83	0.13	-3.34	0	4.39	4.07		4.97	0.27	6.79	3.81	150.67	137.43		8.79	3	0.94	0.27	20.09	8.63
Mg12209	1772		NXFT01003596.1.819_g	IPR001124 Lipid-binding serum glycoprotein 2C C-terminal IPR017942 Lipid-binding serum glycoprotein 2C N-terminal IPR017943 Bactericidal permeability-increasing protein 2C alpha/beta domain superfamily IPR032942 BPI/LBP/Plunc family	0.0	Minc3s00367g11105	IPR001124 Lipid-binding serum glycoprotein2C C-terminal IPR017942 Lipid-binding serum glycoprotein2C N-terminal IPR017943 Bactericidal permeability-increasing protein2C alpha/beta domain superfamily IPR032942 BPI/LBP/Plunc family	0.0	CE47440			4e-43					-6.31	0.96	-1.55	0.77	-3.37	0.02	0.74	0.6		2.62	0.27	9.58	2.63	323.55	220.43		0.27	0.27	4.33	0.27	21.15	32.06
Mg4955	3792		NXFT01001973.1.5124_g	IPR004843 Calcineurin-like phosphoesterase domain 2C ApaH type IPR008963 Purple acid phosphatase-like 2C N-terminal IPR015914 Purple acid phosphatase 2C N-terminal IPR029052 Metallo-dependent phosphatase-like IPR039331 Purple acid phosphatase-like	0.0	Minc3s00339g10520	IPR004843 Calcineurin-like phosphoesterase domain2C ApaH type IPR029052 Metallo-dependent phosphatase-like	0.0	CE47027		Purple acid phosphatase	1e-24	Q9UKV8	Homo sapiens	Protein argonaute-2	1e-24	0.49	1	1.12	0.76	-3.46	0.01	39.64	36.06		19.09	18.02	3.06	14.42	93.99	55.39		17.32	34.42	15.84	20.12	2.74	11.56
Mg11300	1069	SP	NXFT01003611.1.857_g		0.0	Minc3s04622g36683		3.77e-122	CE05840			2e-46	P31730	Onchocerca volvulus	OV39 antigen (Fragment)	8e-15	0.61	0.97	0.73	0.79	-3.47	0	30.04	22.05		19.09	6.18	3.99	2.63	76.42	46.41		23	16.66	9.07	1.68	6.28	5.29
Mg9433	1982		NXFT01001057.1.2760_g	IPR002486 Nematode cuticle collagen 2C N-terminal	0.0	Minc3s00710g16406	IPR002486 Nematode cuticle collagen2C N-terminal IPR008160 Collagen triple helix repeat	1.03e-127	CE29156	rol-8	Cuticle collagen 6	4e-38	P18831	Caenorhabditis elegans	Cuticle collagen 6	7e-37	-0.11	1	0.74	0.88	-3.48	0	7.15	8.45		14.39	3.22	2.13	0.27	381.97	352.78		8.79	8.46	0.94	3.1	41.34	24.95
Mg12677	1807	SP	NXFT01002931.1.7677_g	IPR007284 Ground-like domain	0.0	Minc3s00028g01761	IPR007284 Ground-like domain	1.24e-29	CE07606	grl-9	GRound-Like (grd related)	2e-19					-1.57	0.59	-0.38	0.86	-3.53	0	4.89	4.98		12.03	18.02	6.79	7.35	383.71	405.98		7.37	3	6.36	4.52	37.09	31.64
Mg11962	663																5.43	0.96	1	0.88	-3.54	0.02	0.69	1.01		0.27	0.27	1.2	0.27	73.73	78.14		1.69	0.27	0.27	2.39	7.35	6.12
Mg15535	432		NXFT01001947.1.5021_g		4.98e-78	Minc3s00408g11801		2.03e-70									-6.3	0.92	0.96	0.88	-3.61	0	1.91	2.87		2.62	0.27	0.27	1.45	78	98.33		0.27	0.27	0.94	1.68	8.76	6.12
Mg8274	1173		NXFT01002928.1.7490_g	IPR002486 Nematode cuticle collagen 2C N-terminal IPR008160 Collagen triple helix repeat	0.0	Minc3s07140g40770	IPR002486 Nematode cuticle collagen2C N-terminal IPR008160 Collagen triple helix repeat	2.35e-113	CE06893	col-36	Cuticle collagen 36	2e-16	P34803	Caenorhabditis elegans	Cuticle collagen 36	4e-15	1.02	0.68	0.42	0.79	-3.61	0	23.15	22.82		14.39	12.1	9.58	7.35	1874.74	2069.2		25.85	27.59	11.77	10.9	222.6	100.67
Mg26533	1268		NXFT01000328.1.8616_g	IPR001563 Peptidase S10 2C serine carboxypeptidase IPR018202 Serine carboxypeptidase 2C serine active site IPR029058 Alpha/Beta hydrolase fold	0.0	Minc3s00209g07615	IPR001563 Peptidase S102C serine carboxypeptidase IPR018202 Serine carboxypeptidase2C serine active site IPR029058 Alpha/Beta hydrolase fold	0.0	CE02733		Uncharacterized serine carboxypeptidase F41C3.5	4e-133	O74835	Schizosaccharomyces pombe	rRNA biogenesis protein rrp5	7e-132	0.98	1	-1.39	0.75	-3.63	0.03	1.58	1.59		14.39	0.27	33.79	7.35	1506.97	1325.72		8.79	22.13	6.36	10.2	132.68	96.49
Mg13055	1184		NXFT01000248.1.6665_g	IPR008160 Collagen triple helix repeat	1.36e-102	Minc3s05483g38314	IPR002486 Nematode cuticle collagen2C N-terminal IPR008160 Collagen triple helix repeat	8.58e-84	CE25434	col-48	Cuticle collagen 48	2e-26	P18834	Caenorhabditis elegans	Cuticle collagen 14	9e-16	0.44	1	0	1	-3.87	0.02	2.74	2.43		4.97	0.27	0.27	0.27	54.57	50.9		1.69	5.73	0.27	0.27	4.87	2.78
Mg9742	1147		NXFT01003190.1.8334_g	IPR002486 Nematode cuticle collagen 2C N-terminal IPR008160 Collagen triple helix repeat	1.60e-146	Minc3s00027g01716	IPR002486 Nematode cuticle collagen2C N-terminal IPR008160 Collagen triple helix repeat	1.94e-101	CE11018	col-45	Cuticle collagen 45	8e-20					-0.21	1	0.91	0.71	-3.88	0	23.51	18.87		12.03	9.14	9.58	7.35	488.52	310.16		10.21	8.46	13.81	18	40.63	13.65
Mg9350	1317		NXFT01002004.1.5179_g	IPR002486 Nematode cuticle collagen 2C N-terminal IPR008160 Collagen triple helix repeat	0.0	Minc3s00755g16932	IPR002486 Nematode cuticle collagen2C N-terminal IPR008160 Collagen triple helix repeat	2.18e-76	CE03038	col-125	Cuticle collagen 125	1e-42	P34687	Caenorhabditis elegans	Cuticle collagen 34	3e-35	0.91	0.99	-0.17	1	-3.9	0	2.24	1.35		4.97	0.27	2.13	1.45	184.39	193.51		5.95	4.37	1.62	1.68	16.91	8.63
Mg9434	985		NXFT01002958.1.7768_g	IPR000731 Sterol-sensing domain IPR003392 Protein patched/dispatched	0.0	Minc3s00710g16402	IPR000731 Sterol-sensing domain IPR003392 Protein patched/dispatched	0.0	CE27582			7e-83					-0.92	1	-0.48	0.93	-4.02	0.03	5.29	5.44		4.97	6.18	11.44	0.27	57.42	30.39		3.11	3	2.97	5.94	3.1	2.78
Mg6415	4023		NXFT01003527.1.9204_g		0.0	Minc3s01809g26462		0.0	CE47442			7e-18					0.06	1	-0.79	0.78	-4.27	0	4.67	3.52		2.62	12.1	12.37	9.71	120.9	157.3		8.79	5.73	5.68	7.36	12.3	2.36
Mg17799	1062		NXFT01004193.1.10903_g		0.0	Minc3s00789g17386		5.94e-26									0.66	1	4.44	0.79	-4.28	0	3.79	3.15		2.62	3.22	0.27	0.27	133.09	87.43		0.27	8.46	0.94	0.27	7.7	4.03
Mg10830	968		NXFT01001470.1.3813_g	IPR002486 Nematode cuticle collagen 2C N-terminal IPR008160 Collagen triple helix repeat	0.0	Minc3s04407g36219	IPR002486 Nematode cuticle collagen2C N-terminal IPR008160 Collagen triple helix repeat	1.74e-156									-0.9	1	-1.14	0.89	-4.32	0.05	5.96	7.32		14.39	9.14	5.85	0.27	535.85	434.5		5.95	7.1	1.62	1.68	42.75	5.7
Mg17518	1185		NXFT01000333.1.8792_g	IPR002486 Nematode cuticle collagen 2C N-terminal IPR008160 Collagen triple helix repeat	0.0	Minc3s01652g25358	IPR002486 Nematode cuticle collagen2C N-terminal IPR008160 Collagen triple helix repeat	4.84e-103	CE08753	col-14	Cuticle collagen 14	4e-41	P18834	Caenorhabditis elegans	Cuticle collagen 14	8e-40	-0.31	1	0.7	0.91	-4.32	0	2.6	2		4.97	0.27	0.27	2.63	116.31	91.6		0.27	4.37	1.62	2.39	5.58	5.29
Mg6612	1175		NXFT01000360.1.9479_g		2.62e-179	Minc3s00343g10625	IPR002486 Nematode cuticle collagen2C N-terminal IPR008160 Collagen triple helix repeat	2.05e-116									-0.33	1	1.89	0.62	-4.39	0	23.54	16.97		14.39	12.1	3.99	0.27	296.64	221.39		5.95	15.3	5.68	10.2	17.97	6.96
Mg20452	1296		NXFT01001448.1.3737_g	IPR000111 Glycoside hydrolase family 27/36 2C conserved site IPR002241 Glycoside hydrolase 2C family 27 IPR013780 Glycosyl hydrolase 2C all-beta IPR013785 Aldolase-type TIM barrel IPR017853 Glycoside hydrolase superfamily	0.0	Minc3s01968g27489	IPR000111 Glycoside hydrolase family 27/362C conserved site IPR002241 Glycoside hydrolase2C family 27 IPR013780 Glycosyl hydrolase2C all-beta IPR013785 Aldolase-type TIM barrel IPR017853 Glycoside hydrolase superfamily	0.0	CE06273	gana-1	Alpha-galactosidase	3e-137	Q90744	Gallus gallus	Alpha-N-acetylgalactosaminidase	4e-124	-0.94	1	6.38	0.73	-4.41	0.05	1.74	1.76		0.27	6.18	0.27	0.27	67.23	58.91		3.11	0.27	2.97	0.27	5.22	1.1
Mg19880	1291		NXFT01000121.1.3078_g	IPR008160 Collagen triple helix repeat	0.0	Minc3s01198g21631	IPR008160 Collagen triple helix repeat	9.86e-165									-0.58	1	-0.1	1	-4.61	0	3.31	2.63		4.97	15.06	3.06	2.63	145.6	88.07		5.95	7.1	3.65	1.68	8.76	1.1
Mg12176	1251		NXFT01003829.1.9916_g	IPR008160 Collagen triple helix repeat	0.0	Minc3s00050g02704	IPR002486 Nematode cuticle collagen2C N-terminal IPR008160 Collagen triple helix repeat	3.18e-138	CE43167	col-182	Cuticle collagen 182	7e-25	P34340	Caenorhabditis elegans	Putative cuticle collagen 90	2e-12	-0.85	1	5.98	0.72	-4.88	0.03	1.05	1.3		4.97	0.27	0.27	0.27	45.7	32.31		3.11	0.27	1.62	0.98	2.39	0.68
Mg11032	1323	SP	NXFT01001029.1.2686_g		7.00e-111												-7.27	0.8	0.12	1	-5.92	0.01	0.91	1.28		4.97	0.27	1.2	2.63	83.07	40		0.27	0.27	2.3	1.68	0.27	2.36
Mg67674	727					Minc3s00952g19229	IPR001442 Collagen IV2C non-collagenous IPR008160 Collagen triple helix repeat IPR016187 C-type lectin fold IPR036954 Collagen IV2C non-collagenous domain superfamily	5.77e-14					Q5UQ13	Acanthamoeba polyphaga	Collagen-like protein 2	3e-14	5.43	1	-6.51	0.68	-5.96	0.05	0.27	0.27		0.27	0.27	3.06	0.27	29.71	72.37		1.69	0.27	0.27	0.27	0.27	1.94
Mg15539	1322		NXFT01002615.1.6908_g	IPR002486 Nematode cuticle collagen 2C N-terminal	0.0	Minc3s00100g04559	IPR002486 Nematode cuticle collagen2C N-terminal IPR008160 Collagen triple helix repeat	2.90e-58	CE00956	col-89	Cuticle collagen 89	8e-24	Q17460	Caenorhabditis elegans	Cuticle collagen 10	3e-22	0.21	1	0.2	1	-6.28	0.03	4.67	5.13		16.74	0.27	11.44	0.27	1155.19	401.49		8.79	12.56	5.68	8.78	16.2	4.03
Mg23534	1205		NXFT01000415.1.10869_g	IPR008160 Collagen triple helix repeat	0.0	Minc3s07626g41332	IPR002486 Nematode cuticle collagen2C N-terminal IPR008160 Collagen triple helix repeat	8.01e-83									0.1	1	0	1	-6.36	0.01	1.84	0.94		2.62	0.27	0.27	0.27	97.63	89.36		0.27	3	0.27	0.27	2.39	0.27
Mg15702	1341		NXFT01002745.1.7208_g	IPR002486 Nematode cuticle collagen 2C N-terminal	0.0	Minc3s00097g04467	IPR002486 Nematode cuticle collagen2C N-terminal	2.29e-73	CE04577	col-174	Cuticle collagen 174	4e-22	P20631	Caenorhabditis elegans	Cuticle collagen 13	5e-15	8.2	0.92	-2.12	0.78	-6.39	0.02	2.48	2.29		0.27	0.27	7.72	1.45	402.23	84.55		3.11	7.1	0.27	2.39	2.74	3.61
Mg24971	1511		NXFT01001833.1.4743_g	IPR002486 Nematode cuticle collagen 2C N-terminal IPR008160 Collagen triple helix repeat	0.0	Minc3s03082g32700	IPR002486 Nematode cuticle collagen2C N-terminal IPR008160 Collagen triple helix repeat	5.89e-83	CE04577	col-174	Cuticle collagen 174	7e-17	P20630	Caenorhabditis elegans	Cuticle collagen 12	2e-15	1.06	1	-0.32	1	-6.66	0	1.67	1.66		0.27	6.18	3.06	2.63	379.91	120.44		3.11	8.46	1.62	3.1	3.81	1.52
Mg21913	311		NXFT01002350.1.6253_g		1.03e-43												0.57	1	7.2	0.65	-6.78	0	2.93	2.07		9.68	0.27	0.27	0.27	287.45	98.65		7.37	8.46	0.94	4.52	1.68	2.36
Mg26437	502	SP	NXFT01002350.1.6253_g		1.05e-25												-7.37	0.8	4.44	0.79	-6.87	0.01	0.91	1.06		0.27	6.18	0.27	0.27	62.96	29.11		0.27	0.27	0.94	0.27	0.97	0.27
Mg43814	295		NXFT01002188.1.5786_g		1.88e-120												0.1	1	-6.55	0.81	-7.83	0.04	0.69	0.36		9.68	0.27	3.06	0.27	1835.48	625.5		0.27	11.2	0.27	0.27	9.47	1.52
Mg40918	1480		NXFT01001442.1.3733_g	IPR000834 Peptidase M14 2C carboxypeptidase A	0.0	Minc3s00404g11724	IPR000834 Peptidase M142C carboxypeptidase A IPR003146 Carboxypeptidase2C activation peptide IPR034223 Insect gut carboxypeptidase-like2C carboxypeptidase domain IPR036990 Metallocarboxypeptidase-like2C propeptide	0.0	CE41112			2e-64	P04069	Astacus fluviatilis	Carboxypeptidase B	1e-66	6.41	0.96	7.54	0.64	-8.32	0.03	0.81	0.7		0.27	0.27	0.27	0.27	104.6	27.51		3.11	0.27	6.36	0.27	0.62	0.27
