# Supplementary material for: Analyses of the Root-Knot Nematode (Meloidogyne graminicola) Transcriptome during Host Infection Highlight Specific Gene Expression Profiling in Resistant Rice Plants
Source: Pathogens. 2020 Aug 8;9(8):644. doi: 10.3390/pathogens9080644 (PMC7460394; doi:10.3390/pathogens9080644)
Supplement: Supplementary file 1 [file pathogens-09-00644-s001.zip › Table S4.xlsx]

## Sheet: CWDE
Table S4 CWDE. List of M. graminicola predicted CWDE and comparison of their expression during nematode infection of resistant plants versus susceptible plants.
M. graminicola transcript	Length	Predicted category	PFAM	Predicted function	Best blastn hit			Best blastx hit											edgeR						normalised CPM value
					M. graminicola			M. incognita			C. elegans				Uniprot				LogFC (Tog2 vs Nip2)	FDR (Padj)	LogFC (Tog4 vs Nip4)	FDR (Padj)	LogFC (Tog8 vs Nip8)	FDR (Padj)	pre-J2			in Nipponbare (S)							in Tog5681 (R )
					CDS	Fonction	e-value	Protein	Fonction	e-value	Protein	Class	Fonction	e-value	Protein	Species	Fonction	e-value							J2A	J2B		Nip2A	Nip2B	Nip4A	Nip4B	Nip8A	Nip8B		Tog2A	Tog2B	Tog4A	Tog4B	Tog8A	Tog8B
Cellulose degrading enzyme
Mg133	1760	GH5	PF00150,Cellulase (glycosyl hydrolase family 5)	endoglucanase	NXFT01002739.1.7169_g	IPR001547 Glycoside hydrolase 2C family 5 IPR017853 Glycoside hydrolase superfamily	1.12e-164	Minc3s00520g13673	IPR001547 Glycoside hydrolase2C family 5 IPR001919 Carbohydrate-binding type-2 domain IPR008965 CBM2/CBM32C carbohydrate-binding domain superfamily IPR012291 CBM22C carbohydrate-binding domain superfamily IPR017853 Glycoside hydrolase superfamily IPR018087 Glycoside hydrolase2C family 52C conserved site	3.99e-53					O85465	Bacillus agaradhaerens	Endoglucanase 5A	8e-28	0.19	1	3.84	0	2.82	0	570.2	647.9		16.7	29.9	4	7.3	2.2	2.2		20.2	31.7	59.8	91.8	11.2	16.6
Mg143	1863	GH5	PF00150,Cellulase (glycosyl hydrolase family 5)	endoglucanase	NXFT01000379.1.9902_g	IPR001547 Glycoside hydrolase 2C family 5 IPR017853 Glycoside hydrolase superfamily	0.0	Minc3s00202g07474	IPR001547 Glycoside hydrolase2C family 5 IPR017853 Glycoside hydrolase superfamily IPR018087 Glycoside hydrolase2C family 52C conserved site	1.28e-166					P22541	Butyrivibrio fibrisolvens	Endoglucanase A	2e-34	0.3	1	4.12	0	2.55	0.01	202.8	173		19.1	21	2.1	1.4	1.4	0.9		20.2	29	14.5	40.7	5.9	5.7
Mg325	1686	GH5	PF00150,Cellulase (glycosyl hydrolase family 5)	endoglucanase	NXFT01004291.1.11196_g	IPR001547 Glycoside hydrolase 2C family 5 IPR017853 Glycoside hydrolase superfamily IPR018087 Glycoside hydrolase 2C family 5 2C conserved site	0.0	Minc3s00177g06848	IPR001547 Glycoside hydrolase2C family 5 IPR017853 Glycoside hydrolase superfamily IPR018087 Glycoside hydrolase2C family 52C conserved site	1.38e-88					P07103	Dickeya dadantii	Endoglucanase Z	4e-39	1.32	0.81	3.46	0.08	4.96	0.01	1736.6	1123.61		94.4	106.78	18.89	27.4	4.7	0.59		203.49	295.4	183.72	314.45	65.41	109.46
Mg449	693	GH5	PF09478,Carbohydrate binding domain CBM49	endoglucanase	NXFT01001170.1.319_g	IPR008965 CBM2/CBM3 2C carbohydrate-binding domain superfamily	0.0												2.17	0.03	3.69	0	2.99	0	764	714		68.5	89	11.4	23.9	7.9	5.1		304.4	397.9	181.7	257.7	42	60.5
Mg1857	1066	GH5	PF00150,Cellulase (glycosyl hydrolase family 5)	endoglucanase	NXFT01001222.1.3114_g	IPR017853 Glycoside hydrolase superfamily	0.0	Minc3s05621g38543	IPR001547 Glycoside hydrolase2C family 5 IPR017853 Glycoside hydrolase superfamily	1.71e-71					P10475	Bacillus subtilis	Endoglucanase	2e-20	2	0.51	3.98	0.03	3.56	0.02	632.6	572.5		28.5	15.1	7.7	12.1	4.2	0.9		50	126	120.8	179	29.7	32.9
Mg13236	1063	GH5	PF00150,Cellulase (glycosyl hydrolase family 5)	endoglucanase	NXFT01002960.1.7771_g	IPR001547 Glycoside hydrolase 2C family 5 IPR017853 Glycoside hydrolase superfamily	0.0	Minc3s01357g23087	IPR001547 Glycoside hydrolase2C family 5 IPR017853 Glycoside hydrolase superfamily IPR018087 Glycoside hydrolase2C family 52C conserved site	7.24e-132					P06566	Bacillus sp.	Endoglucanase A	3e-50	-0.43	1	-1.57	0.57	-0.47	0.96	1.67	1.25		14.39	6.18	162.32	202.02	23.86	63.08		15.9	0.27	53.07	69.77	29.65	32.48
Mg34023	846	GH5	PF00150,Cellulase (glycosyl hydrolase family 5)		NXFT01002739.1.7169_g	IPR001547 Glycoside hydrolase 2C family 5 IPR017853 Glycoside hydrolase superfamily	0.0	Minc3s00337g10464		1.13e-85									0	1	-0.546347	0.977879	-2.30337	0.224948	0.528173	0.651334		0.266188	0.266188	2.12886	0.266188	54.7272	47.0544		0.266188	0.266188	1.62007	0.266188	11.9496	9.05173
Mg35045	1119	GH5	PF00150,Cellulase (glycosyl hydrolase family 5)	endoglucanase	NXFT01001030.1.2691_g	IPR001547 Glycoside hydrolase 2C family 5 IPR017853 Glycoside hydrolase superfamily	0.0	Minc3s00202g07474	IPR001547 Glycoside hydrolase2C family 5 IPR017853 Glycoside hydrolase superfamily IPR018087 Glycoside hydrolase2C family 52C conserved site	2.03e-94					P06565	Bacillus sp.	Endoglucanase B	1e-40	-0.9	0.75	-0.49	0.78	1.07	0.47	0.86	0.63		299.13	236.96	91.54	100.55	5.65	8.6		217.7	71.32	72.02	64.81	15.84	12.82
Hemicellulose degrading enzyme
Mg607	697	GH30	PF02055,O-Glycosyl hydrolase family 30	glucuronoxylanase	NXFT01003167.1.8263_g	IPR002934 Polymerase 2C nucleotidyl transferase domain IPR007012 Poly(A) polymerase 2C central domain IPR013780 Glycosyl hydrolase 2C all-beta IPR014492 Poly(A) polymerase IPR017853 Glycoside hydrolase superfamily IPR033452 Glycosyl hydrolase family 30 2C beta sandwich domain	0.0	Minc3s00143g05928	IPR001139 Glycoside hydrolase family 30 IPR013780 Glycosyl hydrolase2C all-beta IPR017853 Glycoside hydrolase superfamily IPR033453 Glycosyl hydrolase family 302C TIM-barrel domain	2.00e-79					Q45070	Bacillus subtilis	Glucuronoxylanase xynC	8e-32	1.02	0.96	3.98	0.15	4.8	0.07	491.03	309.9		26.15	18.02	6.79	2.63	1.22	0.27		23	67.22	37.5	109.49	11.95	23.69
Mg693	1677	GH30	PF02055,O-Glycosyl hydrolase family 30	glucuronoxylanase	NXFT01004135.1.985_g	IPR001139 Glycoside hydrolase family 30 IPR001286 Glycoside hydrolase 2C family 59 IPR017853 Glycoside hydrolase superfamily	0.0	Minc3s03089g32729	IPR001139 Glycoside hydrolase family 30 IPR013780 Glycosyl hydrolase2C all-beta IPR017853 Glycoside hydrolase superfamily IPR033452 Glycosyl hydrolase family 302C beta sandwich domain IPR033453 Glycosyl hydrolase family 302C TIM-barrel domain	3.59e-80	CE26698	gba-3	Putative glucosylceramidase 3	4e-14	Q45070	Bacillus subtilis	Glucuronoxylanase xynC	1e-45	1.57	0.29	3.95	0	4.38	0	396.8	252.5		369.7	467.7	48.7	66.3	5.5	2.8		1233.8	1253.2	719.2	1049.9	56.2	116.2
Mg2233	1590	GH30	PF02055,O-Glycosyl hydrolase family 30	glucuronoxylanase	NXFT01001073.1.2810_g	IPR001139 Glycoside hydrolase family 30 IPR013780 Glycosyl hydrolase 2C all-beta IPR017853 Glycoside hydrolase superfamily IPR033452 Glycosyl hydrolase family 30 2C beta sandwich domain IPR033453 Glycosyl hydrolase family 30 2C TIM-barrel domain	0.0	Minc3s01122g20927	IPR001139 Glycoside hydrolase family 30 IPR013780 Glycosyl hydrolase2C all-beta IPR017853 Glycoside hydrolase superfamily IPR033452 Glycosyl hydrolase family 302C beta sandwich domain IPR033453 Glycosyl hydrolase family 302C TIM-barrel domain	0.0	CE46394	gba-3	Putative glucosylceramidase 3	3e-136	Q5R8E3	Pongo abelii	Glucosylceramidase	2e-120	-0.37	1	0.21	0.93	-0.06	1	31.25	30.02		9.68	29.85	31.93	21.5	51.56	50.58		14.48	15.3	19.22	42.82	47.71	50.47
Mg10585	1825	GH30	PF02055,O-Glycosyl hydrolase family 30	glucuronoxylanase	NXFT01001598.1.4179_g	IPR001139 Glycoside hydrolase family 30 IPR017853 Glycoside hydrolase superfamily IPR033452 Glycosyl hydrolase family 30 2C beta sandwich domain IPR033453 Glycosyl hydrolase family 30 2C TIM-barrel domain	0.0	Minc3s01228g21897	IPR001139 Glycoside hydrolase family 30 IPR017853 Glycoside hydrolase superfamily IPR033452 Glycosyl hydrolase family 302C beta sandwich domain IPR033453 Glycosyl hydrolase family 302C TIM-barrel domain	0.0	CE28522	gba-4	Putative glucosylceramidase 4	1e-99	Q5R8E3	Pongo abelii	Glucosylceramidase	7e-93	0.41	0.96	0.31	0.8	1.45	0.03	43.57	49.52		19.09	26.89	32.86	36.84	23.06	10.2		30.11	30.33	43.59	42.82	51.25	40.01
Mg3907	1013	GH43	PF04616,Glycosyl hydrolases family 43	a-arabinosidase	NXFT01000189.1.4898_g	IPR006710 Glycoside hydrolase 2C family 43 IPR016840 Glycoside hydrolase 2C family 43 2C endo-1 2C 5-alpha-L-arabinosidase IPR023296 Glycosyl hydrolase 2C five-bladed beta-propellor domain superfamily	0.0	Minc3s02565g30665	IPR006710 Glycoside hydrolase2C family 43 IPR016840 Glycoside hydrolase2C family 432C endo-12C 5-alpha-L-arabinosidase IPR023296 Glycosyl hydrolase2C five-bladed beta-propellor domain superfamily	4.47e-160					O44712	Caenorhabditis elegans	Aryl hydrocarbon receptor protein 1	7e-56	7.38	0.92	-1.98	0.78	0.51	1	22.39	31.25		0.27	0.27	3.99	4.99	0.27	0.91		0.27	5.73	0.27	2.39	0.97	0.27
Pectin degrading enzymes
Mg1070	867	PL	PF03211,Pectate lyase	pectate lyase	NXFT01003013.1.7912_g	IPR004898 Pectate lyase PlyH/PlyE-like IPR011050 Pectin lyase fold/virulence factor IPR012334 Pectin lyase fold	0.0	Minc3s01957g27421	IPR004898 Pectate lyase PlyH/PlyE-like IPR011050 Pectin lyase fold/virulence factor IPR012334 Pectin lyase fold	9.64e-113					Q5BA88	Emericella nidulans	Probable pectate lyase D	2e-17	6.4	0.92	5.42	0.77	3.63	0.73	77.31	83.75		0.27	0.27	0.27	0.27	0.27	0.27		0.27	3	0.27	1.68	0.62	0.27
Mg4681	603	PL	PF03211,Pectate lyase	pectate lyase	NXFT01003647.1.9528_g	IPR004898 Pectate lyase PlyH/PlyE-like IPR011050 Pectin lyase fold/virulence factor IPR012334 Pectin lyase fold	0.0	Minc3s00697g16237	IPR004898 Pectate lyase PlyH/PlyE-like IPR011050 Pectin lyase fold/virulence factor IPR012334 Pectin lyase fold	1.20e-68					A1C4B8	Aspergillus clavatus	Probable pectate lyase E	6e-23	-0.07	1	0.86	0.8	1.81	0.73	4.58	2.46		37.92	50.56	2.13	3.81	0.58	0.27		34.37	49.45	7.04	3.1	1.68	0.27
Mg12486	441	PL	PF03211,Pectate lyase	pectate lyase	NXFT01001717.1.4414_g	IPR004898 Pectate lyase PlyH/PlyE-like IPR011050 Pectin lyase fold/virulence factor IPR012334 Pectin lyase fold	7.83e-136	Minc3s01111g20823	IPR004898 Pectate lyase PlyH/PlyE-like IPR011050 Pectin lyase fold/virulence factor IPR012334 Pectin lyase fold	2.92e-48					Q9X6Z2	Paenibacillus barcinonensis	Pectate lyase A	8e-20	1.16	0.97	-0.66	0.98	2.26	0.73	23.99	18.99		4.97	6.18	0.27	2.63	0.58	0.27		13.06	11.2	1.62	0.27	0.62	1.94
Mg32219	1568	PL	PF03211,Pectate lyase	pectate lyase	NXFT01002073.1.5551_g	IPR004898 Pectate lyase PlyH/PlyE-like IPR011050 Pectin lyase fold/virulence factor IPR012334 Pectin lyase fold	0.0	Minc3s00697g16237	IPR004898 Pectate lyase PlyH/PlyE-like IPR011050 Pectin lyase fold/virulence factor IPR012334 Pectin lyase fold	2.07e-85					A1C4B8	Aspergillus clavatus	Probable pectate lyase E	2e-24	-1.67	0.8	-0.85	0.79	0.37	1	4.48	4.29		9.68	18.02	5.85	8.53	11.19	10.84		5.95	3	4.33	3.81	15.49	12.82
Mg2060	2247	GH28	PF00295,Glycosyl hydrolases family 28	polygalacturonase	NXFT01002396.1.6539_g	IPR000743 Glycoside hydrolase 2C family 28 IPR003961 Fibronectin type III IPR006626 Parallel beta-helix repeat IPR011050 Pectin lyase fold/virulence factor IPR012334 Pectin lyase fold IPR013783 Immunoglobulin-like fold IPR036116 Fibronectin type III superfamily	0.0	Minc3s00861g18203	IPR000743 Glycoside hydrolase2C family 28 IPR003961 Fibronectin type III IPR011050 Pectin lyase fold/virulence factor IPR012334 Pectin lyase fold IPR013783 Immunoglobulin-like fold IPR036116 Fibronectin type III superfamily	7.18e-178					P15922	Erwinia chrysanthemi	Exo-poly-alpha-D-galacturonosidase	8e-93	1.12	0.69	3.72	0.02	3.96	0.01	179.9	91.2		136.8	177.8	4	14.4	1.2	0.9		310.1	373.3	86.9	140	9.5	17.8
Mg2993	1869	GH28	PF00295,Glycosyl hydrolases family 28	polygalacturonase	NXFT01001218.1.3099_g	IPR000743 Glycoside hydrolase 2C family 28 IPR011050 Pectin lyase fold/virulence factor IPR012334 Pectin lyase fold	0.0	Minc3s00861g18203	IPR000743 Glycoside hydrolase2C family 28 IPR003961 Fibronectin type III IPR011050 Pectin lyase fold/virulence factor IPR012334 Pectin lyase fold IPR013783 Immunoglobulin-like fold IPR036116 Fibronectin type III superfamily	0.0					P15922	Erwinia chrysanthemi	Exo-poly-alpha-D-galacturonosidase	3e-106	6.98	0.89	8.38	0.13	1.33	0.77	23.99	32.09		0.27	0.27	0.27	0.27	1.22	0.59		1.69	3	5.68	5.94	2.04	1.94
Mg17065	1631	GH28	PF00295,Glycosyl hydrolases family 28	polygalacturonase	NXFT01002672.1.7045_g	IPR000743 Glycoside hydrolase 2C family 28 IPR006626 Parallel beta-helix repeat IPR011050 Pectin lyase fold/virulence factor IPR012334 Pectin lyase fold	0.0	Minc3s00007g00481	IPR000743 Glycoside hydrolase2C family 28 IPR003961 Fibronectin type III IPR011050 Pectin lyase fold/virulence factor IPR012334 Pectin lyase fold IPR013783 Immunoglobulin-like fold IPR024535 Pectate lyase superfamily protein IPR036116 Fibronectin type III superfamily	4.04e-170					P15922	Erwinia chrysanthemi	Exo-poly-alpha-D-galacturonosidase	2e-94	0.01	1	0.2	1	8.05	0.02	3.29	4.62		52.04	80.15	6.79	20.32	0.27	0.27		51.43	80.88	9.74	20.83	1.68	7.8
Expansins
Mg920	826	EXPN	PF03330,DPBB_1	expansin				Minc3s04771g36974	IPR009009 RlpA-like protein2C double-psi beta-barrel domain IPR036908 RlpA-like domain superfamily	1.66e-50									1.27834	0.682176	4.04819	0.00983615	4.90707	0.000732139	123.232	122.839		12.0325	15.0599	2.12886	0.266188	0.582822	0.266188		27.2681	37.1575	19.2205	15.8691	4.16065	9.88845

## Sheet: peptidases
Table S4 peptidases. List of M. graminicola transcripts encoding predicted peptidases and comparison of their expression during nematode infection of resistant plants versus susceptible plants.
M. graminicola transcript	Length	Best blastn hit			Best blastx hit											edgeR						Normalised CPM value
		M. graminicola			M. incognita			C. elegans				Uniprot				LogFC (Tog2 vs Nip2)	FDR (Padj)	LogFC (Tog4 vs Nip4)	FDR (Padj)	LogFC (Tog8 vs Nip8)	FDR (Padj)	pre-J2			in Nipponbare (S)							in Tog5681 (R )
		CDS	Fonction	e-value	Protein	Fonction	e-value	Protein	Class	Fonction	e-value	Protein	Species	Fonction	e-value							J2A	J2B		Nip2A	Nip2B	Nip4A	Nip4B	Nip8A	Nip8B		Tog2A	Tog2B	Tog4A	Tog4B	Tog8A	Tog8B
Mg316	1525	NXFT01003778.1.867_g	IPR001563 Peptidase S10 2C serine carboxypeptidase IPR029058 Alpha/Beta hydrolase fold	0.0	Minc3s01332g22852	IPR001563 Peptidase S102C serine carboxypeptidase IPR029058 Alpha/Beta hydrolase fold	3.20e-131	CE02733		Uncharacterized serine carboxypeptidase F41C3.5	4e-91	Q20970	Caenorhabditis elegans	Methionyl-tRNA synthetase, cytoplasmic	6e-90	1.06242	0.44125	3.04235	0.00261433	4.48897	0.00104289	115.563	96.6969		99.103	165.955	5.85422	16.7842	0.741139	0.266188		275.97	273.535	82.176	94.5927	6.63894	8.63337
Mg613	1819	NXFT01000831.1.2085_g	IPR001506 Peptidase M12A IPR006026 Peptidase 2C metallopeptidase IPR024079 Metallopeptidase 2C catalytic domain superfamily	0.0	Minc3s00138g05784	IPR001506 Peptidase M12A IPR003582 ShKT domain IPR006026 Peptidase2C metallopeptidase IPR024079 Metallopeptidase2C catalytic domain superfamily IPR034035 Astacin-like metallopeptidase domain	0.0	CE03479	nas-10	Zinc metalloproteinase nas-10	3e-64	Q21388	Caenorhabditis elegans	Zinc metalloproteinase nas-10	4e-63	1.20869	0.0656992	2.16287	0.000121393	3.09055	8.01345e-07	416.488	348.125		73.2172	74.2345	34.7257	40.3814	12.14	8.59834		158.014	181.99	151.224	182.536	74.9691	100.672
Mg925	2528	NXFT01004193.1.10905_g	IPR001309 Peptidase C14 2C p20 domain IPR007110 Immunoglobulin-like domain IPR013783 Immunoglobulin-like fold IPR029030 Caspase-like domain superfamily IPR036179 Immunoglobulin-like domain superfamily	0.0	Minc3s00075g03709	IPR001309 Peptidase C142C p20 domain IPR007110 Immunoglobulin-like domain IPR013783 Immunoglobulin-like fold IPR029030 Caspase-like domain superfamily IPR036179 Immunoglobulin-like domain superfamily	0.0	CE29773	malt-1		4e-101	O54698	Rattus norvegicus	Equilibrative nucleoside transporter 1	4e-36	1.21116	0.156082	2.3367	0.000517786	1.65	0.00227499	168.46	130.373		54.3911	41.6885	16.0989	14.4245	8.02372	7.31647		104.01	119.138	66.6064	86.082	18.3223	29.133
Mg1444	1476	NXFT01003778.1.867_g	IPR001563 Peptidase S10 2C serine carboxypeptidase IPR029058 Alpha/Beta hydrolase fold	0.0	Minc3s01332g22852	IPR001563 Peptidase S102C serine carboxypeptidase IPR029058 Alpha/Beta hydrolase fold	5.07e-168	CE02733		Uncharacterized serine carboxypeptidase F41C3.5	6e-114	Q20970	Caenorhabditis elegans	Methionyl-tRNA synthetase, cytoplasmic	1e-112	0.709867	0.78866	3.37517	0.00149923	5.63195	0.000141062	154.313	144.96		153.228	293.181	11.4422	13.2446	0.582822	0.586656		351.291	374.645	133.623	116.579	9.47128	24.531
Mg5072	2317	NXFT01001485.1.3884_g	IPR002110 Ankyrin repeat IPR012338 Beta-lactamase/transpeptidase-like IPR015868 Glutaminase IPR020683 Ankyrin repeat-containing domain IPR036770 Ankyrin repeat-containing domain superfamily IPR041541 Glutaminase 2C EF-hand domain	0.0	Minc3s01063g20340	IPR002110 Ankyrin repeat IPR012338 Beta-lactamase/transpeptidase-like IPR015868 Glutaminase IPR020683 Ankyrin repeat-containing domain IPR036770 Ankyrin repeat-containing domain superfamily IPR041541 Glutaminase2C EF-hand domain	0.0	CE28902	glna-2	Putative glutaminase 2	0.0	Q19013	Caenorhabditis elegans	Putative glutaminase DH11.1	0.0	-0.373137	1	2.59606	0.25236	3.40602	0.0254118	18.7718	22.4361		4.9727	12.1011	2.12886	2.62591	2.48263	0.907123		3.10849	9.83061	16.5128	9.48607	13.0117	19.9291
Mg7672	2019	NXFT01000620.1.1445_g	IPR000834 Peptidase M14 2C carboxypeptidase A	0.0	Minc3s00641g15504	IPR000834 Peptidase M142C carboxypeptidase A IPR008969 Carboxypeptidase-like2C regulatory domain superfamily IPR015567 Peptidase M14B2C caboxypeptidase D	1.82e-82	CE09156	egl-21	Carboxypeptidase E	5e-52	A5A6K7	Pan troglodytes	Carboxypeptidase E	1e-61	0.11847	0.956028	0.974579	0.000467021	2.07928	1.98283e-07	2728.93	2544.97		1139.24	1166.01	378.389	375.461	65.4928	66.9234		1277.88	1224.51	784.163	696.722	271.462	286.424
Mg11784	1052				Minc3s01581g24877	IPR000169 Cysteine peptidase2C cysteine active site IPR000668 Peptidase C1A2C papain C-terminal IPR025660 Cysteine peptidase2C histidine active site IPR025661 Cysteine peptidase2C asparagine active site IPR038765 Papain-like cysteine peptidase superfamily	3.74e-52	CE41106	cpr-6	Cathepsin B-like cysteine proteinase 6	9e-65	P43157	Schistosoma japonicum	Cathepsin B-like cysteine proteinase	1e-65	0.132998	1	3.23142	0.732223	10.3326	0.0351278	11.6506	0.771692		2.61945	0.266188	0.266188	1.44605	0.266188	0.266188		3.10849	0.266188	5.68171	5.23074	36.3785	6.95993
Mg14004	652	NXFT01000171.1.4425_g	IPR001563 Peptidase S10 2C serine carboxypeptidase IPR018202 Serine carboxypeptidase 2C serine active site IPR029058 Alpha/Beta hydrolase fold IPR033124 Serine carboxypeptidases 2C histidine active site	0.0	Minc3s00485g13136	IPR001563 Peptidase S102C serine carboxypeptidase IPR018202 Serine carboxypeptidase2C serine active site IPR029058 Alpha/Beta hydrolase fold	5.53e-43	CE02733		Uncharacterized serine carboxypeptidase F41C3.5	6e-36	Q3AQC2	Chlorobium chlorochromatii	Adenosylhomocysteinase	1e-34	1.25229	0.44125	2.01856	0.125232	7.65033	0.0117071	0.337639	0.362475		127.342	148.203	3.99154	13.2446	0.266188	0.266188		305.814	348.685	36.821	28.6351	1.68236	5.70486
Mg49150	2353	NXFT01001485.1.3884_g	IPR002110 Ankyrin repeat IPR012338 Beta-lactamase/transpeptidase-like IPR015868 Glutaminase IPR020683 Ankyrin repeat-containing domain IPR036770 Ankyrin repeat-containing domain superfamily IPR041541 Glutaminase 2C EF-hand domain	0.0	Minc3s01063g20340	IPR002110 Ankyrin repeat IPR012338 Beta-lactamase/transpeptidase-like IPR015868 Glutaminase IPR020683 Ankyrin repeat-containing domain IPR036770 Ankyrin repeat-containing domain superfamily IPR041541 Glutaminase2C EF-hand domain	0.0	CE42058	glna-1		3e-117	Q19013	Caenorhabditis elegans	Putative glutaminase DH11.1	4e-109	1.68284	0.890662	1.3152	0.762869	3.80938	0.0221199	22.2252	21.5936		0.266188	9.14239	5.85422	2.62591	1.84936	0.907123		11.6354	15.296	6.35865	14.4506	14.7819	19.0923

## Sheet: neuropeptides
Table S4 neuropeptides. List of M. graminicola transcripts encoding predicted neuropeptide-like proteins (nlp), FMRFamide-related peptides (flp), neuropeptide-related proteins or neuropeptide receptors (npr), and comparison of their expression during nematode infection of resistant plants versus susceptible plants.
M. graminicola transcript	Length	Predicted category	Best blastn hit			Best blastx hit											EdgeR						Normalised CPM value
			M. graminicola			M. incognita			C. elegans				Uniprot				LogFC (Tog2 vs Nip2)	FDR (Padj)	LogFC (Tog4 vs Nip4)	FDR (Padj)	LogFC (Tog8 vs Nip8)	FDR (Padj)	pre-J2			in Nipponbare (S)							in Tog5681 (R )
			CDS	Fonction	e-value	Protein	Fonction	e-value	Protein	Class	Fonction	e-value	Protein	Species	Fonction	e-value							J2A	J2B		Nip2A	Nip2B	Nip4A	Nip4B	Nip8A	Nip8B		Tog2A	Tog2B	Tog4A	Tog4B	Tog8A	Tog8B
Neuropeptide like proteins (nlp)
Mg1702	1428	nlp-12	NXFT01001253.1.3185_g		7.00e-166	Minc3s01010g19824		5.43e-61	CE12268	nlp-12		4e-14					0.0670313	1	1.39817	0.0363944	2.19198	0.000707124	238.053	171.752		143.815	148.203	44.0391	33.3022	9.13194	3.79133		156.593	149.198	90.9762	113.032	26.4653	33.7349
Mg2703	826	nlp-15	NXFT01003187.1.8328_g	IPR040384 Feeding circuit activating peptide precursor	0.0	Minc3s00756g16936	IPR040384 Feeding circuit activating peptide precursor	7.59e-107	CE36118	nlp-15		2e-23					0.0497997	1	0.821468	0.0140724	1.86777	3.51117e-06	685.403	570.04		652.119	642.312	225.65	239.778	42.6951	39.3632		720.79	619.221	445.016	376.863	158.877	139.58
FMRFamide-related peptide-like (flp)
Mg338	570	flp-7	NXFT01003587.1.9376_g	IPR002544 FMRFamide-related peptide-like	0.0	Minc3s01847g26723	IPR002544 FMRFamide-related peptide-like	4.29e-30	CE07264	flp-7	TPMQRSSMVRF-amide 2	1e-18					0.241494	0.9222	1.23491	0.00167517	2.79215	3.54593e-07	512.422	441.522		539.162	467.746	172.564	137.13	17.8394	16.61		614.204	576.864	365.814	363.388	100.106	136.233
Mg5812	489	flp-11	NXFT01003304.1.8611_g		0.0	Minc3s03062g32619		9.07e-53	CE04704	flp-11	SPLDEEDFAPESPLQ-amide	4e-14	Q21156	Caenorhabditis elegans	FMRFamide-like neuropeptides 11	6e-13	1.16964	0.956028	0.926713	0.797887	1.85169	0.563234	34.7529	28.3818		4.9727	6.18366	3.99154	3.80577	5.33233	0.266188		14.4777	9.83061	7.0356	7.3584	6.63894	13.6537
Mg93	888	flp	NXFT01004063.1.10629_g		0.0	Minc3s00991g19646		4.52e-36									0.902331	0.9222	2.0118	0.301786	3.6074	0.0340367	892.418	713.988		155.581	115.657	20.7556	54.5397	8.49867	2.50946		239.02	269.436	143.778	153.458	40.981	97.7439
Mg610	1971	flp	NXFT01002234.1.5945_g	IPR000467 G-patch domain	0.0	Minc3s01629g25218	IPR000467 G-patch domain IPR040052 Splicing factor 45	8.41e-60	CE06009	rbm-7		4e-12					0.219765	0.975034	0.784841	0.211747	1.01005	0.0363237	479.745	406.065		212.059	136.368	51.4898	91.1153	32.2462	34.8767		209.176	198.386	133.623	110.196	68.9503	65.5302
Mg616	411	flp	NXFT01001530.1.414_g		9.88e-100	Minc3s00198g07337		1.85e-30									-0.0553377	1	0.926075	0.395441	3.089	0.000181006	145.263	130.927		28.5053	23.9361	10.5109	13.2446	1.69104	1.86853		27.2681	23.4941	15.8358	28.6351	10.1794	16.1638
Mg1557	472	flp	NXFT01003107.1.8088_g	IPR002544 FMRFamide-related peptide-like	0.0	Minc3s00048g02615	IPR002544 FMRFamide-related peptide-like	2.09e-53									0.16011	1	1.22481	0.271201	2.53972	0.00773309	156.409	133.262		96.7498	195.543	53.3524	29.7627	5.9656	2.82993		167.962	156.03	95.0379	100.266	18.3223	33.3166
Mg2129	631	flp	NXFT01000452.1.112_g	IPR002544 FMRFamide-related peptide-like	6.48e-173	Minc3s01318g22714	IPR002544 FMRFamide-related peptide-like	1.41e-73									0.333486	0.91048	1.5805	0.00122063	3.14445	8.01345e-07	301.286	337.942		162.641	248.8	41.2451	53.3598	5.9656	6.0346		266.022	250.308	145.131	135.728	46.2916	55.9079
Mg2811	332	flp	NXFT01000446.1.103_g	IPR002544 FMRFamide-related peptide-like	9.75e-129	Minc3s00616g15157	IPR002544 FMRFamide-related peptide-like	6.10e-28									0.330017	0.956028	0.938498	0.355797	2.90595	0.000313797	162.673	154.878		66.1574	100.863	13.3049	38.0217	2.79926	3.79133		111.116	97.2768	53.0676	42.8195	20.8006	24.1127
Neuroendocrine 7B2 precursor
Mg240	980	sbt-1	NXFT01001776.1.4582_g	IPR007945 Neuroendocrine 7B2 precursor	0.0	Minc3s01764g26130	IPR007945 Neuroendocrine 7B2 precursor	5.19e-44	CE18921	sbt-1		2e-14					0.243789	0.888741	1.00489	0.00181681	1.65792	5.29056e-06	1761.66	1659.81		798.021	861.258	304.814	281.073	89.2403	67.2439		999.336	964.907	613.574	561.97	236.766	257.139
Neuroendocrine convertase 2
Mg225	2600	egl-3	NXFT01000632.1.156_g	IPR000209 Peptidase S8/S53 domain IPR002884 P domain IPR008979 Galactose-binding-like domain superfamily IPR015500 Peptidase S8 2C subtilisin-related IPR022398 Peptidase S8 2C subtilisin 2C His-active site IPR023827 Peptidase S8 2C subtilisin 2C Asp-active site IPR023828 Peptidase S8 2C subtilisin 2C Ser-active site IPR032815 Peptidase S8 2C pro-domain IPR034182 Kexin/furin catalytic domain IPR03…	0.0	Minc3s04067g35400	IPR000209 Peptidase S8/S53 domain IPR002884 P domain IPR008979 Galactose-binding-like domain superfamily IPR015500 Peptidase S82C subtilisin-related IPR022398 Peptidase S82C subtilisin2C His-active site IPR023827 Peptidase S82C subtilisin2C Asp-active site IPR023828 Peptidase S82C subtilisin2C Ser-active site IPR032815 Peptidase S82C pro-domain IPR034182 Kexin/furin catalytic domain IPR036852 Pep…	0.0	CE08940	egl-3	Neuroendocrine convertase 2	3e-179	Q9GLR0	Bos taurus	Neuroendocrine convertase 2	1e-107	0.0521208	1	1.05806	0.000411436	1.8428	4.73991e-07	4055.05	4217.99		2047.6	2237.07	608.43	624.412	125.495	119.801		2285.48	2156.36	1208.61	1357.72	387.942	491.001
Neuropeptide receptors (npr)
Mg5273	1294	npr-3	NXFT01003404.1.8935_g	IPR000276 G protein-coupled receptor 2C rhodopsin-like IPR017452 GPCR 2C rhodopsin-like 2C 7TM	0.0	Minc3s06118g39359	IPR000276 G protein-coupled receptor2C rhodopsin-like IPR017452 GPCR2C rhodopsin-like2C 7TM	0.0	CE08056	npr-3		3e-77	Q64121	Rattus norvegicus	Prolactin-releasing peptide receptor	1e-22	0.259181	1	0.73478	0.782433	1.69704	0.697585	21.6298	18.4643		19.0923	15.0599	5.85422	8.5252	2.79926	2.82993		21.5835	19.395	11.0972	12.323	5.22278	11.9802
Mg2475	1206	npr-4	NXFT01000167.1.4356_g	IPR000276 G protein-coupled receptor 2C rhodopsin-like IPR000611 Neuropeptide Y receptor family IPR017452 GPCR 2C rhodopsin-like 2C 7TM	0.0	Minc3s00126g05377	IPR000276 G protein-coupled receptor2C rhodopsin-like IPR017452 GPCR2C rhodopsin-like2C 7TM	0.0	CE37317	npr-4		2e-113	Q9EQD2	Rattus norvegicus	Neuropeptide FF receptor 2	1e-23	0.664417	0.956028	-0.275316	0.940408	1.54725	0.20289	30.6564	27.8281		21.4455	12.1011	11.4422	10.8849	1.05777	2.82993		28.6892	24.8604	9.06642	9.48607	4.86873	4.86814
Mg4740	1098	npr-4	NXFT01002921.1.7662_g	IPR000276 G protein-coupled receptor 2C rhodopsin-like IPR000611 Neuropeptide Y receptor family IPR017452 GPCR 2C rhodopsin-like 2C 7TM	0.0	Minc3s01812g26474	IPR000276 G protein-coupled receptor2C rhodopsin-like IPR000611 Neuropeptide Y receptor family	0.0	CE37317	npr-4		2e-101	P34992	Xenopus laevis	Neuropeptide Y receptor type 1	3e-23	-0.471035	1	8.00023	0.5584	1.70441	0.770812	8.88786	5.63415		4.9727	3.22492	0.266188	0.266188	0.741139	0.907123		3.10849	2.99888	0.266188	8.77685	0.62023	3.61306
Mg1607	1252	npr-5	NXFT01003672.1.9592_g	IPR000276 G protein-coupled receptor 2C rhodopsin-like IPR017452 GPCR 2C rhodopsin-like 2C 7TM	0.0	Minc3s00047g02583	IPR000276 G protein-coupled receptor2C rhodopsin-like IPR017452 GPCR2C rhodopsin-like2C 7TM	0.0	CE36962	npr-5		1e-120	O02813	Canis familiaris	Neuropeptide Y receptor type 1	4e-19	0.304036	1	1.09245	0.684128	0.93729	0.470952	47.209	52.3089		23.7988	6.18366	6.78555	13.2446	4.85738	4.1118		17.32	20.7614	17.1897	24.3797	4.16065	12.817
Mg2987	2084	npr-6	NXFT01003181.1.8288_g	IPR000276 G protein-coupled receptor 2C rhodopsin-like IPR017452 GPCR 2C rhodopsin-like 2C 7TM	0.0	Minc3s00809g17626	IPR000276 G protein-coupled receptor2C rhodopsin-like IPR000611 Neuropeptide Y receptor family IPR017452 GPCR2C rhodopsin-like2C 7TM	0.0	CE31509	npr-6		1e-78	P79113	Bos taurus	Neuropeptide Y receptor type 2	8e-38	0.0344836	1	1.35228	0.317775	-0.424168	0.552064	28.37	33.148		16.739	12.1011	4.92288	9.70506	14.0398	16.9305		14.4777	15.296	15.1589	20.8336	11.5955	11.5619
Mg11159	1451	npr-8	NXFT01002970.1.7797_g	IPR000276 G protein-coupled receptor 2C rhodopsin-like IPR017452 GPCR 2C rhodopsin-like 2C 7TM	0.0	Minc3s01338g22909	IPR000276 G protein-coupled receptor2C rhodopsin-like IPR017452 GPCR2C rhodopsin-like2C 7TM	0.0	CE30923	npr-8	Probable G-protein coupled receptor npr-8	1e-78	O22608	Dunaliella salina	60S ribosomal protein L5	5e-77	1.93102	0.928579	-0.803686	0.902516	2.28215	0.777382	17.2475	14.2518		4.9727	0.266188	3.0602	6.16548	1.69104	0.266188		4.52965	15.296	0.943129	4.52152	3.09852	5.2865
Mg11554	1524	npr-9	NXFT01001679.1.4329_g	IPR000276 G protein-coupled receptor 2C rhodopsin-like IPR017452 GPCR 2C rhodopsin-like 2C 7TM	0.0	Minc3s00561g14299	IPR000276 G protein-coupled receptor2C rhodopsin-like IPR017452 GPCR2C rhodopsin-like2C 7TM	0.0	CE03814	npr-9	Galanin-like G-protein coupled receptor npr-9	2e-41	Q8WPA2	Bombyx mori	Allatostatin-A receptor	3e-27	-2.06975	0.55642	0.356544	0.958899	2.29103	1	21.6298	24.6026		23.7988	35.771	2.12886	7.34534	0.899456	0.907123		8.7931	5.73157	4.32783	7.3584	1.68236	5.2865
Mg5753	1946	npr-9	NXFT01000831.1.2087_g	IPR000276 G protein-coupled receptor 2C rhodopsin-like IPR000405 Galanin receptor family IPR001506 Peptidase M12A IPR003582 ShKT domain IPR006026 Peptidase 2C metallopeptidase IPR017452 GPCR 2C rhodopsin-like 2C 7TM IPR024079 Metallopeptidase 2C catalytic domain superfamily	0.0	Minc3s00138g05782	IPR000276 G protein-coupled receptor2C rhodopsin-like IPR000405 Galanin receptor family IPR017452 GPCR2C rhodopsin-like2C 7TM	0.0	CE03814	npr-9	Galanin-like G-protein coupled receptor npr-9	2e-148	Q8WPA2	Bombyx mori	Allatostatin-A receptor	3e-55	-1.03906	0.993106	-0.0215135	1	1.54033	0.971648	9.05457	9.79853		14.3857	6.18366	3.99154	4.98562	1.21609	0.907123		8.7931	1.63253	5.00477	3.8123	4.16065	1.10291
Mg7442	2515	npr-10	NXFT01003364.1.8816_g	IPR000276 G protein-coupled receptor 2C rhodopsin-like IPR017452 GPCR 2C rhodopsin-like 2C 7TM	0.0	Minc3s01010g19832	IPR000276 G protein-coupled receptor2C rhodopsin-like IPR017452 GPCR2C rhodopsin-like2C 7TM	1.84e-163	CE36989	npr-10		1e-63	Q9Z2D5	Cavia porcellus	Neuropeptide Y receptor type 2	6e-16	-0.808583	1	1.79575	0.780765	0.315886	0.973828	13.5083	11.5317		0.266188	18.0186	2.12886	2.62591	2.48263	2.50946		4.52965	5.73157	5.00477	10.1953	1.68236	4.44978
Mg6100	1233	npr-12	NXFT01001663.1.4286_g	IPR000276 G protein-coupled receptor 2C rhodopsin-like IPR000611 Neuropeptide Y receptor family IPR017452 GPCR 2C rhodopsin-like 2C 7TM	0.0	Minc3s00376g11243	IPR000276 G protein-coupled receptor2C rhodopsin-like IPR000611 Neuropeptide Y receptor family IPR017452 GPCR2C rhodopsin-like2C 7TM	0.0	CE17256	npr-12		5e-127	Q18179	Caenorhabditis elegans	Putative neuropeptide Y receptor 11	8e-49	0.208624	1	0.705453	0.687033	0.819877	0.684131	48.8048	44.3894		37.9183	29.8535	16.0989	9.70506	7.70709	6.35507		41.4796	37.1575	17.8666	24.3797	10.1794	14.4904
Mg8632	1159	npr-13	NXFT01001652.1.4253_g	IPR000276 G protein-coupled receptor 2C rhodopsin-like IPR000611 Neuropeptide Y receptor family IPR017452 GPCR 2C rhodopsin-like 2C 7TM	0.0	Minc3s00007g00462	IPR000276 G protein-coupled receptor2C rhodopsin-like IPR000611 Neuropeptide Y receptor family IPR017452 GPCR2C rhodopsin-like2C 7TM	0.0	CE35920	npr-13		3e-135	O02813	Canis familiaris	Neuropeptide Y receptor type 1	3e-33	0.529857	1	-0.0129666	1	0.870833	0.280038	11.5553	11.5558		9.67922	3.22492	2.12886	6.16548	0.899456	0.907123		14.4777	4.36523	5.68171	2.39385	0.974272	1.93962
Mg7583	1293	npr-14	NXFT01003948.1.10294_g	IPR000276 G protein-coupled receptor 2C rhodopsin-like IPR000611 Neuropeptide Y receptor family IPR017452 GPCR 2C rhodopsin-like 2C 7TM	0.0	Minc3s03327g33530	IPR000276 G protein-coupled receptor2C rhodopsin-like IPR000611 Neuropeptide Y receptor family IPR017452 GPCR2C rhodopsin-like2C 7TM	0.0	CE42751	npr-14		2e-70	Q9TUP7	Canis familiaris	Orexin receptor type 2	3e-35	-0.0346787	1	2.09378	0.345978	0.455343	0.266695	20.2008	16.6108		33.2118	9.14239	3.0602	2.62591	3.11589	1.86853		14.4777	27.5931	9.74336	13.0322	2.39044	4.44978
Mg11091	1171	npr-15	NXFT01000657.1.1533_g	IPR000276 G protein-coupled receptor 2C rhodopsin-like IPR017452 GPCR 2C rhodopsin-like 2C 7TM	0.0	Minc3s00513g13567	IPR000276 G protein-coupled receptor2C rhodopsin-like IPR017452 GPCR2C rhodopsin-like2C 7TM	1.15e-159	CE43181	npr-15	Neuropeptide receptor 15	3e-33	Q09638	Caenorhabditis elegans	Neuropeptide receptor 15	4e-32	-0.607045	1	-0.0520488	1	-0.88985	0.808449	9.95961	11.315		9.67922	12.1011	2.12886	4.98562	1.37441	0.586656		5.9508	8.46427	2.97395	3.8123	0.266188	1.10291
Mg12010	1240	npr-15	NXFT01001130.1.2957_g	IPR000276 G protein-coupled receptor 2C rhodopsin-like IPR000504 RNA recognition motif domain IPR012677 Nucleotide-binding alpha-beta plait domain superfamily IPR017452 GPCR 2C rhodopsin-like 2C 7TM IPR035979 RNA-binding domain superfamily	0.0	Minc3s00653g15657	IPR000276 G protein-coupled receptor2C rhodopsin-like IPR017452 GPCR2C rhodopsin-like2C 7TM	0.0	CE43181	npr-15	Neuropeptide receptor 15	2e-38	Q09638	Caenorhabditis elegans	Neuropeptide receptor 15	3e-37	7.96313	0.825413	1.45303	0.788013	-2.9842	1	3.19565	5.44158		0.266188	0.266188	2.12886	0.266188	48.8695	24.3012		0.266188	8.46427	1.62007	4.52152	2.39044	7.37829
Mg3838	3103	npr-16	NXFT01004063.1.10633_g	IPR000276 G protein-coupled receptor 2C rhodopsin-like IPR017452 GPCR 2C rhodopsin-like 2C 7TM	0.0	Minc3s01152g21217	IPR000276 G protein-coupled receptor2C rhodopsin-like IPR017452 GPCR2C rhodopsin-like2C 7TM	0.0	CE31186	npr-16		2e-79	P35346	Homo sapiens	Somatostatin receptor type 5	6e-17	-1.44173	0.829893	2.1757	0.433503	1.30374	1	24.9404	27.5874		16.739	29.8535	1.19753	2.62591	2.16599	0.907123		11.6354	5.73157	9.06642	5.93996	2.39044	4.86814
Mg4684	3292	npr-17	NXFT01001784.1.4600_g	IPR000276 G protein-coupled receptor 2C rhodopsin-like IPR017452 GPCR 2C rhodopsin-like 2C 7TM	0.0	Minc3s00759g16978	IPR000276 G protein-coupled receptor2C rhodopsin-like IPR017452 GPCR2C rhodopsin-like2C 7TM	0.0	CE38997	npr-17	Probable G-protein coupled receptor C06G4.5	2e-151	P35525	Rattus norvegicus	Chloride channel protein 2	4e-150	-0.622904	0.865011	0.388565	0.784306	0.608825	0.955426	48.4951	37.6012		56.7444	41.6885	20.7556	23.8634	9.76521	9.23928		25.8469	38.5239	26.6669	31.4719	12.6577	16.1638
Mg5159	1858	npr-18	NXFT01002126.1.5566_g	IPR000276 G protein-coupled receptor 2C rhodopsin-like IPR017452 GPCR 2C rhodopsin-like 2C 7TM	0.0	Minc3s02395g29836	IPR000276 G protein-coupled receptor2C rhodopsin-like IPR017452 GPCR2C rhodopsin-like2C 7TM	3.13e-117	CE47497	npr-18	Neuropeptide receptor 18	1e-51	Q99NI4	Rattus norvegicus	Inositol polyphosphate multikinase	5e-47	0.812536	1	2.04711	0.667979	1.56916	0.713114	56.188	57.5325		0.266188	18.0186	4.92288	0.266188	2.79926	1.54806		10.2143	19.395	9.74336	11.6137	3.80661	8.63337
Mg6229	1572	npr-20	NXFT01001241.1.3156_g	IPR000276 G protein-coupled receptor 2C rhodopsin-like IPR017452 GPCR 2C rhodopsin-like 2C 7TM	0.0	Minc3s00373g11195	IPR000276 G protein-coupled receptor2C rhodopsin-like IPR017452 GPCR2C rhodopsin-like2C 7TM	6.26e-123	CE46449	npr-20		2e-37	Q8K0C9	Mus musculus	GDP-mannose 4,6 dehydratase	4e-11	-0.40894	1	0.900489	0.661895	0.926112	0.881415	22.4634	25.5654		42.6248	18.0186	9.57957	21.5037	8.65699	12.7644		24.4258	22.1277	24.6361	32.1812	23.2789	16.5822
Mg12096	424	npr-21	NXFT01002107.1.5463_g	IPR000276 G protein-coupled receptor 2C rhodopsin-like IPR017452 GPCR 2C rhodopsin-like 2C 7TM	0.0	Minc3s05614g38526	IPR000276 G protein-coupled receptor2C rhodopsin-like IPR017452 GPCR2C rhodopsin-like2C 7TM	4.13e-74	CE35783	npr-21		4e-33					2.21206	0.907274	0.162483	1	1.33798	0.875507	7.959	5.75451		4.9727	0.266188	7.71689	2.62591	2.16599	1.54806		4.52965	19.395	4.32783	7.3584	3.45257	5.2865
Mg6986	915	npr-22	NXFT01002740.1.7174_g	IPR000276 G protein-coupled receptor 2C rhodopsin-like IPR017452 GPCR 2C rhodopsin-like 2C 7TM	0.0	Minc3s03553g34179	IPR000276 G protein-coupled receptor2C rhodopsin-like IPR017452 GPCR2C rhodopsin-like2C 7TM	6.72e-168	CE31260	npr-22	Neuropeptide receptor 22	2e-70	P25931	Drosophila melanogaster	Neuropeptide Y receptor	2e-34	9.28972	0.349049	0.785351	0.841271	-1.37629	0.316855	14.6991	13.5537		0.266188	0.266188	3.99154	3.80577	2.00768	2.50946		7.37195	13.9297	4.32783	8.77685	1.32831	0.684547
Mg12302	1255	npr-27	NXFT01003183.1.8304_g	IPR000276 G protein-coupled receptor 2C rhodopsin-like IPR017452 GPCR 2C rhodopsin-like 2C 7TM	0.0	Minc3s02272g29193	IPR000276 G protein-coupled receptor2C rhodopsin-like IPR017452 GPCR2C rhodopsin-like2C 7TM IPR018247 EF-Hand 12C calcium-binding site	2.42e-142	CE47648	npr-27		5e-38	P34315	Caenorhabditis elegans	Putative sodium/calcium exchanger 6	3e-26	8.38201	0.777569	-0.593377	0.98073	0.231655	0.8802	16.1043	18.6569		0.266188	0.266188	2.12886	2.62591	2.32431	0.907123		3.10849	8.46427	1.62007	1.68463	0.266188	3.61306
Mg3698	1681	npr-27	NXFT01000001.1.2_g	IPR000276 G protein-coupled receptor 2C rhodopsin-like IPR017452 GPCR 2C rhodopsin-like 2C 7TM	0.0	Minc3s00981g19550	IPR000276 G protein-coupled receptor2C rhodopsin-like IPR017452 GPCR2C rhodopsin-like2C 7TM	9.90e-131	CE47648	npr-27		2e-29	Q9ZNY3	Euglena gracilis	Calreticulin	2e-23	0.978659	0.956028	-0.342523	0.944329	0.133296	1	14.5086	15.5757		4.9727	6.18366	5.85422	14.4245	12.4566	8.27787		7.37195	13.9297	4.32783	11.6137	8.7632	14.072
Mg3340	1335	npr-29	NXFT01001547.1.4031_g	IPR000276 G protein-coupled receptor 2C rhodopsin-like IPR001173 Glycosyltransferase 2-like IPR017452 GPCR 2C rhodopsin-like 2C 7TM IPR029044 Nucleotide-diphospho-sugar transferases	0.0	Minc3s06182g39463	IPR000276 G protein-coupled receptor2C rhodopsin-like IPR017452 GPCR2C rhodopsin-like2C 7TM	0.0	CE24711	npr-29	Probable G-protein coupled receptor npr-29	6e-62	Q95QD7	Caenorhabditis elegans	Protein lin-54	9e-61	-2.64691	0.9222	0.831674	0.966161	0.2783	1	7.29213	6.45258		12.0325	6.18366	2.12886	0.266188	1.53272	0.907123		3.10849	0.266188	0.266188	3.8123	0.974272	1.93962
Mg7615	2398	npr-31	NXFT01003895.1.10168_g	IPR000276 G protein-coupled receptor 2C rhodopsin-like IPR017452 GPCR 2C rhodopsin-like 2C 7TM	0.0	Minc3s00500g13374	IPR000276 G protein-coupled receptor2C rhodopsin-like IPR017452 GPCR2C rhodopsin-like2C 7TM	0.0	CE39767	npr-31		1e-42					1.5288	0.902515	0.583608	0.858603	1.05535	0.648533	28.2509	29.0799		9.67922	0.266188	7.71689	3.80577	2.16599	3.47086		10.2143	19.395	5.68171	11.6137	4.86873	6.12322
Mg1468	2126	npr-32	NXFT01003596.1.822_g	IPR000276 G protein-coupled receptor 2C rhodopsin-like IPR017452 GPCR 2C rhodopsin-like 2C 7TM	0.0	Minc3s00012g00803	IPR000276 G protein-coupled receptor2C rhodopsin-like IPR017452 GPCR2C rhodopsin-like2C 7TM	0.0	CE47992	npr-32		2e-58	Q8C9S8	Mus musculus	Cysteine protease ATG4A	2e-15	-1.97543	0.9222	2.23417	0.764798	0.874629	0.892464	21.1773	16.9959		4.9727	18.0186	0.266188	2.62591	2.79926	0.266188		3.10849	2.99888	5.00477	5.93996	2.39044	3.1947
Mg5233	1511	npr-35	NXFT01002981.1.7845_g	IPR000276 G protein-coupled receptor 2C rhodopsin-like IPR017452 GPCR 2C rhodopsin-like 2C 7TM	0.0	Minc3s00128g05455	IPR000276 G protein-coupled receptor2C rhodopsin-like IPR017452 GPCR2C rhodopsin-like2C 7TM	0.0	CE04239	npr-35		9e-78	Q9Y5X5	Homo sapiens	Neuropeptide FF receptor 2	2e-23	0.349764	1	0.43208	0.79874	1.72124	0.706635	58.1647	61.6246		12.0325	29.8535	15.1676	17.9641	4.38243	1.86853		24.4258	27.5931	16.5128	27.9258	7.70107	12.817

## Sheet: molting
Table S4 molting. List of M. graminicola transcripts encoding predicted molting-related proteins and comparison of their expression during nematode infection of resistant plants versus susceptible plants.
M. graminicola transcript	Length	Best blastn hit			Best blastx hit											edgeR						Normalised CPM value
		M. graminicola			M. incognita			C. elegans				Uniprot				LogFC (Tog2 vs Nip2)	FDR (Padj)	LogFC (Tog4 vs Nip4)	FDR (Padj)	LogFC (Tog8 vs Nip8)	FDR (Padj)	pre-J2			in Nipponbare (S)							in Tog5681 (R )
		CDS	Fonction	e-value	Protein	Fonction	e-value	Protein	Class	Fonction	e-value	Protein	Species	Fonction	e-value							J2A	J2B		Nip2A	Nip2B	Nip4A	Nip4B	Nip8A	Nip8B		Tog2A	Tog2B	Tog4A	Tog4B	Tog8A	Tog8B
Cuticle collagen protein (col)
Mg17518	1185	NXFT01000333.1.8792_g	IPR002486 Nematode cuticle collagen 2C N-terminal IPR008160 Collagen triple helix repeat	0.0	Minc3s01652g25358	IPR002486 Nematode cuticle collagen2C N-terminal IPR008160 Collagen triple helix repeat	4.84e-103	CE08753	col-14	Cuticle collagen 14	4e-41	P18834	Caenorhabditis elegans	Cuticle collagen 14	8e-40	-0.307769	1	0.697259	0.910303	-4.32257	0.00165126	2.60023	1.99934		4.9727	0.266188	0.266188	2.62591	116.313	91.5994		0.266188	4.36523	1.62007	2.39385	5.57682	5.2865
Mg8274	1173	NXFT01002928.1.7490_g	IPR002486 Nematode cuticle collagen 2C N-terminal IPR008160 Collagen triple helix repeat	0.0	Minc3s07140g40770	IPR002486 Nematode cuticle collagen2C N-terminal IPR008160 Collagen triple helix repeat	2.35e-113	CE06893	col-36	Cuticle collagen 36	2e-16	P34803	Caenorhabditis elegans	Cuticle collagen 36	4e-15	1.01597	0.675419	0.418522	0.788013	-3.60913	4.12309e-06	23.1541	22.8213		14.3857	12.1011	9.57957	7.34534	1874.74	2069.2		25.8469	27.5931	11.7742	10.9045	222.605	100.672
Mg11578	1310	NXFT01000189.1.4894_g	IPR002486 Nematode cuticle collagen 2C N-terminal IPR008160 Collagen triple helix repeat	0.0	Minc3s00085g04054	IPR002486 Nematode cuticle collagen2C N-terminal IPR008160 Collagen triple helix repeat	3.92e-98	CE45752	col-40	Cuticle collagen 40	1e-23	P34804	Caenorhabditis elegans	Cuticle collagen 40	2e-22	1.42074	0.9222	0.309034	0.933885	-2.62877	0.0208113	6.76817	4.238		4.9727	0.266188	8.64823	14.4245	75.6251	46.4135		3.10849	11.197	15.1589	13.0322	9.47128	10.7252
Mg19409	1156	NXFT01004176.1.10848_g		2.07e-150	Minc3s00088g04195	IPR002486 Nematode cuticle collagen2C N-terminal IPR008160 Collagen triple helix repeat	8.73e-69	CE07615	col-43		5e-22	P08124	Caenorhabditis elegans	Cuticle collagen 1	1e-19	-7.22632	0.890557	0	1	-2.64083	0.731194	0.980691	0.675405		4.9727	0.266188	0.266188	0.266188	13.2482	8.91881		0.266188	0.266188	0.266188	0.266188	2.0364	1.93962
Mg9742	1147	NXFT01003190.1.8334_g	IPR002486 Nematode cuticle collagen 2C N-terminal IPR008160 Collagen triple helix repeat	1.60e-146	Minc3s00027g01716	IPR002486 Nematode cuticle collagen2C N-terminal IPR008160 Collagen triple helix repeat	1.94e-101	CE11018	col-45		8e-20					-0.205125	1	0.914158	0.711793	-3.88276	0.000140422	23.5114	18.8735		12.0325	9.14239	9.57957	7.34534	488.516	310.158		10.2143	8.46427	13.805	17.9967	40.627	13.6537
Mg13055	1184	NXFT01000248.1.6665_g	IPR008160 Collagen triple helix repeat	1.36e-102	Minc3s05483g38314	IPR002486 Nematode cuticle collagen2C N-terminal IPR008160 Collagen triple helix repeat	8.58e-84	CE25434	col-48		2e-26	P18834	Caenorhabditis elegans	Cuticle collagen 14	9e-16	0.437244	1	0	1	-3.86858	0.0182761	2.74313	2.43263		4.9727	0.266188	0.266188	0.266188	54.5689	50.9		1.68734	5.73157	0.266188	0.266188	4.86873	2.77634
Mg25448	1221	NXFT01001979.1.5133_g	IPR002486 Nematode cuticle collagen 2C N-terminal	0.0	Minc3s00032g01918	IPR002486 Nematode cuticle collagen2C N-terminal	3.83e-125	CE18860	col-65		4e-17					-6.33824	0.9222	0	1	-3.22367	0.0900258	1.12359	1.15684		0.266188	3.22492	0.266188	0.266188	77.0499	83.2672		0.266188	0.266188	0.266188	0.266188	15.49	1.93962
Mg7455	1281	NXFT01003955.1.926_g	IPR002486 Nematode cuticle collagen 2C N-terminal IPR008160 Collagen triple helix repeat	0.0	Minc3s01822g26528	IPR002486 Nematode cuticle collagen2C N-terminal IPR008160 Collagen triple helix repeat	1.80e-111	CE08889	col-68		3e-17	P34804	Caenorhabditis elegans	Cuticle collagen 40	3e-15	-8.92539	0.177997	-0.718907	0.788013	-2.33329	0.0109896	9.19748	7.82466		2.61945	15.0599	6.78555	4.98562	116.629	122.685		0.266188	0.266188	5.68171	1.68463	27.8815	19.9291
Mg29988	1147	NXFT01004011.1.10459_g	IPR002486 Nematode cuticle collagen 2C N-terminal IPR008160 Collagen triple helix repeat	0.0	Minc3s03801g34855	IPR002486 Nematode cuticle collagen2C N-terminal IPR008160 Collagen triple helix repeat	4.16e-161	CE02272	col-84		6e-17	P12114	Caenorhabditis elegans	Cuticle collagen sqt-1	1e-15	-9.13022	0.232738	-1.50618	0.782433	-1.69147	0.392858	1.36176	0.988336		7.32596	12.1011	3.99154	0.266188	60.2683	53.4638		0.266188	0.266188	0.266188	1.68463	14.4279	21.1841
Mg15539	1322	NXFT01002615.1.6908_g	IPR002486 Nematode cuticle collagen 2C N-terminal	0.0	Minc3s00100g04559	IPR002486 Nematode cuticle collagen2C N-terminal IPR008160 Collagen triple helix repeat	2.90e-58	CE00956	col-89		8e-24	Q17460	Caenorhabditis elegans	Cuticle collagen 10	3e-22	0.213644	1	0.195628	1	-6.27617	0.0303841	4.67229	5.12865		16.739	0.266188	11.4422	0.266188	1155.19	401.491		8.7931	12.5633	5.68171	8.77685	16.1981	4.03142
Mg2733	1105	NXFT01002747.1.7213_g	IPR002486 Nematode cuticle collagen 2C N-terminal IPR008160 Collagen triple helix repeat	0.0	Minc3s00036g02114	IPR002486 Nematode cuticle collagen2C N-terminal IPR008160 Collagen triple helix repeat	9.82e-63	CE00956	col-89		9e-18	Q17460	Caenorhabditis elegans	Cuticle collagen 10	8e-16	1.40344	0.9222	-0.613601	0.861587	-0.0232293	1	31.2994	27.1301		37.9183	6.18366	36.5884	17.9641	921.829	559.161		21.5835	100.009	24.6361	11.6137	805.358	652.488
Mg5161	2391	NXFT01000358.1.843_g	IPR008160 Collagen triple helix repeat	0.0	Minc3s00007g00483	IPR008160 Collagen triple helix repeat	0.0	CE46192	col-99	Putative cuticle collagen 99	8e-17	O76368	Caenorhabditis elegans	Putative cuticle collagen 99	1e-15	-0.243547	1	1.94014	0.783595	-0.459707	1	4.93427	4.79165		4.9727	0.266188	2.12886	0.266188	9.60689	6.996		4.52965	0.266188	1.62007	6.64918	4.86873	7.37829
Mg13674	836	NXFT01002787.1.7300_g	IPR008160 Collagen triple helix repeat	0.0	Minc3s02387g29786	IPR002486 Nematode cuticle collagen2C N-terminal IPR008160 Collagen triple helix repeat	1.54e-142	CE17509	col-113		2e-34					7.37555	0.9222	0	1	-0.576955	1	1.40939	1.7827		0.266188	0.266188	0.266188	0.266188	5.80728	4.1118		0.266188	5.73157	0.266188	0.266188	4.86873	1.93962
Mg27441	823	NXFT01003552.1.9276_g	IPR002486 Nematode cuticle collagen 2C N-terminal IPR008160 Collagen triple helix repeat	0.0	Minc3s00207g07573	IPR002486 Nematode cuticle collagen2C N-terminal IPR008160 Collagen triple helix repeat	3.83e-81	CE03749	col-117		6e-32	P34687	Caenorhabditis elegans	Cuticle collagen 34	3e-29	0	1	6.39762	0.782433	-2.69306	0.810419	0.718707	0.386546		0.266188	0.266188	0.266188	0.266188	3.43253	7.95741		0.266188	0.266188	1.62007	1.68463	0.266188	1.93962
Mg24610	1128	NXFT01000251.1.6687_g	IPR002486 Nematode cuticle collagen 2C N-terminal IPR008160 Collagen triple helix repeat	0.0	Minc3s01017g19896	IPR008160 Collagen triple helix repeat	1.95e-144	CE05967	col-121		1e-21	P34688	Caenorhabditis elegans	Cuticle collagen dpy-7	2e-18	0	1	-6.02476	0.854711	-2.14085	0.829463	0.885424	0.940193		0.266188	0.266188	0.266188	2.62591	91.4568	71.0895		0.266188	0.266188	0.266188	0.266188	36.7325	0.266188
Mg8972	497	NXFT01004063.1.10638_g	IPR002486 Nematode cuticle collagen 2C N-terminal IPR008160 Collagen triple helix repeat	5.82e-73	Minc3s00496g13315	IPR002486 Nematode cuticle collagen2C N-terminal IPR008160 Collagen triple helix repeat	1.28e-27	CE03038	col-125		2e-13					0.438057	1	-0.404365	0.863427	0.824974	0.75094	1.90955	1.39755		37.9183	6.18366	988.416	679.865	1074.92	878.026		11.6354	50.821	526.249	735.02	1809.42	1650.27
Mg9350	1217	NXFT01002004.1.5179_g	IPR002486 Nematode cuticle collagen 2C N-terminal IPR008160 Collagen triple helix repeat	0.0	Minc3s00755g16932	IPR002486 Nematode cuticle collagen2C N-terminal IPR008160 Collagen triple helix repeat	5.18e-66	CE03038	col-125		5e-43	P34687	Caenorhabditis elegans	Cuticle collagen 34	2e-35	0.420847	1	1.54989	0.732846	-3.87908	9.49933e-05	2.10008	1.39755		4.9727	0.266188	0.266188	2.62591	203.862	170.114		3.10849	4.36523	2.97395	3.8123	15.49	10.3068
Mg5888	850	NXFT01004102.1.10748_g		0.0	Minc3s05937g39061	IPR002486 Nematode cuticle collagen2C N-terminal IPR008160 Collagen triple helix repeat	6.94e-107	CE05937	col-126		2e-23	A8XV36	Caenorhabditis briggsae	Cuticle collagen 10	6e-23	0	1	-2.68127	0.78693	-2.03244	0.890215	0.409089	0.482833		0.266188	0.266188	6.78555	2.62591	4.69906	4.75273		0.266188	0.266188	1.62007	0.266188	2.39044	0.266188
Mg6254	1190	NXFT01002440.1.6468_g	IPR008160 Collagen triple helix repeat	0.0	Minc3s00264g08932	IPR008160 Collagen triple helix repeat	2.19e-133	CE05597	col-128		5e-21					-1.46135	0.805415	-1.29148	0.600707	-1.8268	0.147193	15.1755	4.83979		21.4455	9.14239	17.0303	19.1439	46.3364	40.3246		4.52965	7.09792	8.38948	6.64918	16.9062	7.79665
Mg1823	1070	NXFT01003552.1.9279_g	IPR002486 Nematode cuticle collagen 2C N-terminal IPR008160 Collagen triple helix repeat	0.0	Minc3s02310g29380	IPR002486 Nematode cuticle collagen2C N-terminal IPR008160 Collagen triple helix repeat	6.72e-112	CE05574	col-130		3e-11					-7.21766	0.9222	0	1	-3.31846	0.73774	2.19535	2.16784		4.9727	0.266188	0.266188	0.266188	7.23214	4.43226		0.266188	0.266188	0.266188	0.266188	1.32831	0.266188
Mg70232	1297				Minc3s09567g43338	IPR008160 Collagen triple helix repeat	2.29e-41	CE33807	col-135		1e-18	P02466	Rattus norvegicus	Collagen alpha-2(I) chain	1e-13	0	1	0	1	-2.90926	0.807564	0.290005	0.266188		0.266188	0.266188	0.266188	0.266188	4.85738	8.27787		0.266188	0.266188	0.266188	0.266188	0.266188	1.93962
Mg73591	842				Minc3s09567g43338	IPR008160 Collagen triple helix repeat	1.12e-31	CE46447	col-135		3e-18	Q5UQ13	Acanthamoeba polyphaga	Collagen-like protein 2	2e-18	0	1	-9.31056	0.517916	-2.16264	0.904099	0.266188	0.266188		0.266188	0.266188	0.266188	21.5037	2.16599	3.79133		0.266188	0.266188	0.266188	0.266188	0.62023	1.10291
Mg8870	2576	NXFT01004183.1.10863_g	IPR002486 Nematode cuticle collagen 2C N-terminal IPR008160 Collagen triple helix repeat	0.0	Minc3s02512g30404	IPR002486 Nematode cuticle collagen2C N-terminal IPR008160 Collagen triple helix repeat	0.0	CE07061	col-165		8e-12					7.99418	0.746552	-0.102498	1	-1.03186	0.802527	3.33855	1.85491		0.266188	0.266188	5.85422	4.98562	28.9216	26.865		8.7931	0.266188	7.0356	3.10307	17.6142	9.88845
Mg15702	1341	NXFT01002745.1.7208_g	IPR002486 Nematode cuticle collagen 2C N-terminal	0.0	Minc3s00097g04467	IPR002486 Nematode cuticle collagen2C N-terminal	2.29e-73	CE04577	col-174		4e-22	P20631	Caenorhabditis elegans	Cuticle collagen 13	5e-15	8.19723	0.9222	-2.11647	0.782433	-6.38868	0.0222318	2.48115	2.2882		0.266188	0.266188	7.71689	1.44605	402.233	84.5491		3.10849	7.09792	0.266188	2.39385	2.74448	3.61306
Mg24971	1511	NXFT01001833.1.4743_g	IPR002486 Nematode cuticle collagen 2C N-terminal IPR008160 Collagen triple helix repeat	0.0	Minc3s03082g32700	IPR002486 Nematode cuticle collagen2C N-terminal IPR008160 Collagen triple helix repeat	5.89e-83	CE04577	col-174		7e-17	P20630	Caenorhabditis elegans	Cuticle collagen 12	2e-15	1.06345	1	-0.316927	1	-6.66132	0.000503178	1.67138	1.66234		0.266188	6.18366	3.0602	2.62591	379.91	120.441		3.10849	8.46427	1.62007	3.10307	3.80661	1.52127
Mg22386	1092	NXFT01003517.1.9177_g	IPR008160 Collagen triple helix repeat	0.0	Minc3s01868g26853	IPR002486 Nematode cuticle collagen2C N-terminal IPR008160 Collagen triple helix repeat	3.87e-81	CE02380	col-176		4e-22	A8XV36	Caenorhabditis briggsae	Cuticle collagen 10	9e-21	7.41497	0.894556	-1.32134	0.790507	1.50441	0.834833	1.45703	0.579119		0.266188	0.266188	10.5109	7.34534	3.11589	3.15039		5.9508	0.266188	3.65089	3.8123	9.47128	7.37829
Mg12176	1251	NXFT01003829.1.9916_g	IPR008160 Collagen triple helix repeat	0.0	Minc3s00050g02704	IPR002486 Nematode cuticle collagen2C N-terminal IPR008160 Collagen triple helix repeat	3.18e-138	CE43167	col-182		7e-25	P34340	Caenorhabditis elegans	Putative cuticle collagen 90	2e-12	-0.847055	1	5.98331	0.716517	-4.88277	0.034546	1.05214	1.30127		4.9727	0.266188	0.266188	0.266188	45.7032	32.3129		3.10849	0.266188	1.62007	0.97541	2.39044	0.684547
Cuticlin (cut) and cuticlin-like (cutl)
Mg28392	1368	NXFT01000419.1.10985_g	IPR001507 Zona pellucida domain	0.0	Minc3s00890g18557	IPR001507 Zona pellucida domain	0.0	CE02165	cut-1	Cuticlin-1	2e-180	Q03755	Caenorhabditis elegans	Cuticlin-1	3e-179	-2.49749	0.930663	-2.71488	0.782433	-1.5842	0.901894	1.81428	2.19191		7.32596	9.14239	5.85422	3.80577	3.27421	4.75273		1.68734	1.63253	1.62007	0.266188	0.266188	2.77634
Mg11960	1866	NXFT01001285.1.3287_g	IPR001507 Zona pellucida domain	0.0	Minc3s00127g05423	IPR001507 Zona pellucida domain	0.0	CE37892	cut-4		3e-80	Q03755	Caenorhabditis elegans	Cuticlin-1	1e-60	-0.101418	1	0.914601	0.782433	0.110988	1	5.02954	6.66923		16.739	12.1011	5.85422	2.62591	10.3985	9.23928		15.8989	11.197	6.35865	9.48607	8.40915	12.817
Mg10102	725	NXFT01002921.1.7653_g	IPR001507 Zona pellucida domain	0.0	Minc3s00160g06392	IPR001507 Zona pellucida domain	3.18e-111	CE40396	cut-5		5e-64	Q03755	Caenorhabditis elegans	Cuticlin-1	1e-50	-0.228316	1	-0.351187	0.915427	-1.14554	0.620824	7.98282	7.46359		12.0325	6.18366	11.4422	12.0648	17.5227	13.7258		8.7931	7.09792	9.74336	8.77685	6.63894	7.79665
Mg13895	509	NXFT01002921.1.7653_g	IPR001507 Zona pellucida domain	0.0	Minc3s00160g06392	IPR001507 Zona pellucida domain	1.73e-109	CE40396	cut-5		3e-51	Q03755	Caenorhabditis elegans	Cuticlin-1	5e-41	1.44197	1	-2.5336	0.775968	-0.423678	1	2.81458	2.81778		2.61945	0.266188	2.12886	2.62591	9.60689	6.67554		3.10849	4.36523	0.266188	0.97541	6.99299	5.2865
Mg17103	2133	NXFT01003628.1.9485_g	IPR001507 Zona pellucida domain IPR001898 Solute carrier family 13 IPR002035 von Willebrand factor 2C type A IPR036465 von Willebrand factor A-like domain superfamily	0.0	Minc3s00681g16015	IPR001507 Zona pellucida domain IPR002035 von Willebrand factor2C type A IPR036465 von Willebrand factor A-like domain superfamily	0.0	CE35746	cut-6		8e-39	O08746	Mus musculus	Matrilin-2	7e-15	0.920152	0.993364	3.16321	0.246204	-2.41467	0.0344774	2.24298	3.37142		4.9727	0.266188	0.266188	1.44605	61.8515	79.7421		5.9508	4.36523	4.32783	5.93996	11.2415	15.7455
Mg27069	2030	NXFT01000136.1.3473_g	IPR001370 BIR repeat IPR001507 Zona pellucida domain IPR002035 von Willebrand factor 2C type A IPR036465 von Willebrand factor A-like domain superfamily	0.0	Minc3s01359g23114	IPR001507 Zona pellucida domain IPR002035 von Willebrand factor2C type A IPR036465 von Willebrand factor A-like domain superfamily	0.0	CE35746	cut-6		0.0	Q03755	Caenorhabditis elegans	Cuticlin-1	2e-64	-2.46381	0.88673	-0.608802	0.966161	-2.81505	0.0134792	2.31443	1.71048		4.9727	3.22492	0.266188	2.62591	111.246	107.943		0.266188	1.63253	1.62007	0.266188	21.1547	10.3068
Mg7421	2058	NXFT01003383.1.8875_g	IPR002035 von Willebrand factor 2C type A IPR036465 von Willebrand factor A-like domain superfamily	0.0	Minc3s00836g17929	IPR002035 von Willebrand factor2C type A IPR036465 von Willebrand factor A-like domain superfamily	0.0	CE35746	cut-6		2e-11					1.28735	0.927781	-1.12216	0.737331	-0.65929	0.865055	2.90985	3.56399		4.9727	0.266188	17.0303	22.6835	21.639	15.9691		5.9508	7.09792	11.0972	7.3584	8.7632	15.3271
Mg9133	3347	NXFT01002589.1.6838_g	IPR001507 Zona pellucida domain	0.0	Minc3s00076g03727	IPR001507 Zona pellucida domain	1.28e-144	CE41846	cutl-4		5e-68	Q03755	Caenorhabditis elegans	Cuticlin-1	2e-48	1.10498	0.956028	-3.8295	0.127326	-3.34078	0.0010078	4.38649	4.0695		4.9727	0.266188	6.78555	3.80577	150.667	137.426		8.7931	2.99888	0.943129	0.266188	20.0925	8.63337
Mg37311	1055	NXFT01000835.1.2105_g	IPR001507 Zona pellucida domain	0.0	Minc3s00799g17503	IPR001507 Zona pellucida domain	0.0	CE04365	cutl-5		8e-96	Q03755	Caenorhabditis elegans	Cuticlin-1	3e-31	0	1	-0.677724	1	-2.09878	0.917158	0.837791	0.579119		0.266188	0.266188	0.266188	2.62591	3.59084	4.1118		0.266188	0.266188	0.266188	1.68463	0.266188	1.93962
Mg871	3538	NXFT01002747.1.7215_g		0.0	Minc3s00100g04558	IPR001507 Zona pellucida domain	0.0	CE39963	cutl-6		8e-113	Q03755	Caenorhabditis elegans	Cuticlin-1	3e-36	1.44661	0.930662	-0.833831	0.79229	0.77972	0.913291	3.43382	2.1197		68.5107	3.22492	2043.62	1414.92	1417.2	1539.15		25.8469	179.258	996.046	944.949	3170	1904.64
Mg2878	745	NXFT01000470.1.1078_g	IPR001507 Zona pellucida domain	1.78e-119	Minc3s02048g27969	IPR001507 Zona pellucida domain	1.22e-51	CE42793	cutl-7		1e-15					-0.257381	1	0.482348	0.788013	0.212834	1	20.6533	19.3309		21.4455	12.1011	17.0303	12.0648	16.5728	18.2124		20.1623	8.46427	21.2513	19.4152	16.5521	23.6943
Mg19931	2324	NXFT01004063.1.10635_g	IPR001507 Zona pellucida domain	0.0	Minc3s00008g00572	IPR001507 Zona pellucida domain	0.0	CE45739	cutl-8		4e-155	Q03755	Caenorhabditis elegans	Cuticlin-1	5e-45	6.42147	0.956028	2.23252	0.788013	-1.65826	0.881415	1.55229	1.08462		0.266188	0.266188	1.19753	0.266188	5.9656	8.91881		3.10849	0.266188	3.65089	1.68463	3.09852	1.93962
Mg39704	1360	NXFT01002065.1.537_g	IPR001507 Zona pellucida domain	0.0	Minc3s00794g17461	IPR001507 Zona pellucida domain	0.0	CE22434	cutl-10		6e-135	Q03755	Caenorhabditis elegans	Cuticlin-1	1e-51	0	1	-0.672824	1	-0.579925	1	1.38558	1.39755		0.266188	0.266188	0.266188	2.62591	4.69906	3.47086		0.266188	0.266188	0.266188	1.68463	4.51469	1.10291
Mg15614	1236	NXFT01003574.1.9353_g	IPR001507 Zona pellucida domain	0.0	Minc3s00561g14301	IPR001507 Zona pellucida domain	0.0	CE03617	cutl-11		2e-116	Q03755	Caenorhabditis elegans	Cuticlin-1	5e-51	-1.91881	0.9222	-2.64182	0.628853	-0.399743	1	5.86313	6.13965		4.9727	6.18366	2.12886	7.34534	13.5648	16.9305		0.266188	2.99888	1.62007	0.266188	13.7198	9.47009
Mg6566	2312	NXFT01002184.1.5772_g	IPR001507 Zona pellucida domain IPR004898 Pectate lyase PlyH/PlyE-like IPR011050 Pectin lyase fold/virulence factor IPR012334 Pectin lyase fold	0.0	Minc3s00724g16551	IPR001507 Zona pellucida domain	0.0	CE03617	cutl-11		9e-57	Q03755	Caenorhabditis elegans	Cuticlin-1	7e-33	-0.0823282	1	1.6654	0.589757	-1.08761	0.713114	8.05427	6.33223		23.7988	0.266188	8.64823	2.62591	55.8354	40.0041		7.37195	16.6623	19.2205	16.5783	22.5708	22.8576
Mg23246	1468	NXFT01003626.1.9483_g	IPR001507 Zona pellucida domain	0.0	Minc3s01462g24022	IPR001507 Zona pellucida domain	0.0	CE41859	cutl-14		1e-71	Q03755	Caenorhabditis elegans	Cuticlin-1	2e-66	-3.34823	0.893758	0.520122	1	-2.47245	0.77672	1.88573	1.39755		16.739	12.1011	3.99154	0.266188	2.95758	2.18899		0.266188	2.99888	2.97395	3.10307	0.266188	1.10291
Mg16482	2507	NXFT01003388.1.8900_g	IPR001507 Zona pellucida domain	0.0	Minc3s01479g24143	IPR001507 Zona pellucida domain	0.0	CE32057	cutl-16		3e-71	Q03755	Caenorhabditis elegans	Cuticlin-1	7e-36	7.39662	0.796069	-5.00158	0.780765	-2.09597	0.0101028	5.29153	4.88793		0.266188	0.266188	1.19753	0.266188	120.587	91.9199		3.10849	2.99888	0.266188	0.266188	26.8193	23.2759
Enzymes of the collagen biogenesis pathway
Mg25332	2831	NXFT01001352.1.371_g	IPR001507 Zona pellucida domain	0.0	Minc3s00060g03110	IPR001507 Zona pellucida domain	0.0	CE46375	dpy-1		4e-31	Q03755	Caenorhabditis elegans	Cuticlin-1	3e-12	-0.714329	0.842612	-0.281252	0.782433	1.13556	0.0102229	4.17214	4.35836		35.5651	20.9773	601.91	601.994	201.012	207.929		11.6354	23.4941	548.588	442.111	527.081	370.514
Mg16434	945	NXFT01000835.1.2100_g	IPR002486 Nematode cuticle collagen 2C N-terminal IPR008160 Collagen triple helix repeat	0.0	Minc3s00799g17496	IPR002486 Nematode cuticle collagen2C N-terminal IPR008160 Collagen triple helix repeat	8.06e-117	CE04953	dpy-2	Cuticle collagen dpy-2	2e-11					6.41389	0.936983	-0.0743957	1	-2.26257	0.496314	1.86191	2.16784		0.266188	0.266188	0.266188	2.62591	38.4206	35.5176		3.10849	0.266188	2.29701	0.266188	10.8874	4.86814
Mg7810	1390	NXFT01000103.1.2699_g	IPR008160 Collagen triple helix repeat	0.0	Minc3s00140g05832	IPR002486 Nematode cuticle collagen2C N-terminal IPR008160 Collagen triple helix repeat	1.94e-125	CE04580	dpy-7	Cuticle collagen dpy-7	6e-58	P34688	Caenorhabditis elegans	Cuticle collagen dpy-7	1e-56	-0.664988	1	0.599998	0.929032	-1.3733	0.74895	8.41152	9.82261		0.266188	23.9361	12.3736	0.266188	58.6852	56.9889		8.7931	5.73157	10.4203	9.48607	30.3598	14.4904
Mg14676	1008	NXFT01003663.1.9574_g	IPR005123 Oxoglutarate/iron-dependent dioxygenase IPR006620 Prolyl 4-hydroxylase 2C alpha subunit IPR011990 Tetratricopeptide-like helical domain superfamily IPR013547 Prolyl 4-hydroxylase alpha-subunit 2C N-terminal	0.0	Minc3s00722g16528	IPR005123 Oxoglutarate/iron-dependent dioxygenase IPR006620 Prolyl 4-hydroxylase2C alpha subunit IPR011990 Tetratricopeptide-like helical domain superfamily IPR013547 Prolyl 4-hydroxylase alpha-subunit2C N-terminal	8e-130	CE20261	dpy-18	Prolyl 4-hydroxylase subunit alpha-1	3e-93	Q10576	Caenorhabditis elegans	Prolyl 4-hydroxylase subunit alpha-1	5e-92	0	1	0	1	0.810527	1	1.79046	1.30127		0.266188	0.266188	0.266188	0.266188	0.899456	0.907123		0.266188	0.266188	0.266188	0.266188	1.68236	1.10291
Mg6271	1720	NXFT01004284.1.11177_g	IPR005123 Oxoglutarate/iron-dependent dioxygenase IPR006620 Prolyl 4-hydroxylase 2C alpha subunit IPR011990 Tetratricopeptide-like helical domain superfamily IPR013547 Prolyl 4-hydroxylase alpha-subunit 2C N-terminal	0.0	Minc3s01274g22363	IPR011990 Tetratricopeptide-like helical domain superfamily IPR013547 Prolyl 4-hydroxylase alpha-subunit2C N-terminal	0.0	CE20261	dpy-18	Prolyl 4-hydroxylase subunit alpha-1	0.0	Q10576	Caenorhabditis elegans	Prolyl 4-hydroxylase subunit alpha-1	0.0	0.417076	0.956028	-0.1369	0.973337	-1.05277	0.13524	28.4652	25.6617		9.67922	29.8535	44.9704	32.1224	77.9998	77.8193		30.1104	20.7614	36.144	34.3088	42.3972	32.8982
Mg11784	499	NXFT01002230.1.5929_g	IPR000859 CUB domain IPR000884 Thrombospondin type-1 (TSP1) repeat IPR001506 Peptidase M12A IPR006026 Peptidase 2C metallopeptidase IPR017050 Metallopeptidase 2C nematode IPR024079 Metallopeptidase 2C catalytic domain superfamily IPR035914 Spermadhesin 2C CUB domain superfamily IPR036383 Thrombospondin type-1 (TSP1) repeat superfamily	4.27e-114	Minc3s00004g00264	IPR000859 CUB domain IPR000884 Thrombospondin type-1 (TSP1) repeat IPR001506 Peptidase M12A IPR006026 Peptidase2C metallopeptidase IPR013032 EGF-like2C conserved site IPR017050 Metallopeptidase2C nematode IPR024079 Metallopeptidase2C catalytic domain superfamily IPR034035 Astacin-like metallopeptidase domain IPR035914 Spermadhesin2C CUB domain superfamily IPR036383 Thrombospondin type-1 (TSP1) re…	4.86e-55	CE27200	dpy-31	Zinc metalloproteinase dpy-31	4e-48	P98060	Caenorhabditis elegans	Zinc metalloproteinase dpy-31	5e-47	-0.0342709	1	6.96806	0.709821	-2.03985	0.82474	2.5526	1.85491		0.266188	6.18366	0.266188	0.266188	9.60689	4.1118		0.266188	5.73157	2.97395	1.68463	0.974272	2.77634
Mg73433	759							CE27200	dpy-31	Zinc metalloproteinase dpy-31	6e-13	P98060	Caenorhabditis elegans	Zinc metalloproteinase dpy-31	9e-12	0	1	-8.8396	0.626406	0.066637	1	0.266188	0.266188		0.266188	0.266188	0.266188	15.6044	0.582822	3.47086		0.266188	0.266188	0.266188	0.266188	0.974272	3.1947
Mg74	1831	NXFT01002181.1.5570_g	IPR005123 Oxoglutarate/iron-dependent dioxygenase IPR006620 Prolyl 4-hydroxylase 2C alpha subunit IPR011990 Tetratricopeptide-like helical domain superfamily IPR013547 Prolyl 4-hydroxylase alpha-subunit 2C N-terminal	0.0	Minc3s00478g13015	IPR005123 Oxoglutarate/iron-dependent dioxygenase IPR006620 Prolyl 4-hydroxylase2C alpha subunit IPR011990 Tetratricopeptide-like helical domain superfamily IPR013026 Tetratricopeptide repeat-containing domain IPR013547 Prolyl 4-hydroxylase alpha-subunit2C N-terminal	2e-176	CE05811	phy-2	Prolyl 4-hydroxylase subunit alpha-2	8e-171	Q20065	Caenorhabditis elegans	Prolyl 4-hydroxylase subunit alpha-2	1e-169	0.62737	0.6866	-0.0668585	1	-0.574234	0.396253	352.659	240.741		66.1574	62.3996	176.289	122.972	152.409	121.082		105.431	93.1777	150.547	135.728	110.373	73.479
Mg9518	1191	NXFT01004176.1.10849_g		6.71e-66	Minc3s00088g04195	IPR002486 Nematode cuticle collagen2C N-terminal IPR008160 Collagen triple helix repeat	1.08e-69	CE05707	sqt-3	Cuticle collagen 1	2e-17	P08124	Caenorhabditis elegans	Cuticle collagen 1	3e-16	0.162552	1	0.427912	0.889644	-3.13599	0.0199146	20.2246	20.1012		30.8585	6.18366	19.8243	4.98562	1559.06	1313.86		13.0566	30.3258	15.1589	19.4152	187.554	139.58
Mg3411	817	NXFT01000891.1.2258_g	IPR001179 FKBP-type peptidyl-prolyl cis-trans isomerase domain IPR023566 Peptidyl-prolyl cis-trans isomerase 2C FKBP-type	0.0	Minc3s00350g10773	IPR001179 FKBP-type peptidyl-prolyl cis-trans isomerase domain	1e-62	CE27878	fkb-5	Peptidylprolyl isomerase	3e-88	Q95QC4	Caenorhabditis elegans	Serine/threonine-protein kinase zyg-8	8e-30	0.952488	0.64035	-0.198082	0.878263	-0.195478	0.96536	16.5569	17.8625		28.5053	23.9361	165.113	143.029	249.615	224.914		28.6892	72.6825	128.208	140.692	255.53	158.824
Mg1257	2828	NXFT01002548.1.6714_g	IPR006896 Sec23/Sec24 2C trunk domain IPR006900 Sec23/Sec24 2C helical domain IPR007123 Gelsolin-like domain IPR012990 Sec23/Sec24 beta-sandwich IPR029006 ADF-H/Gelsolin-like domain superfamily IPR036175 Sec23/Sec24 helical domain superfamily IPR036180 Gelsolin-like domain superfamily IPR036465 von Willebrand factor A-like domain superfamily IPR037364 Protein transport protein Sec23 IPR037550 Sec…	0.0	Minc3s00159g06380	IPR006895 Zinc finger2C Sec23/Sec24-type IPR006896 Sec23/Sec242C trunk domain IPR006900 Sec23/Sec242C helical domain IPR007123 Gelsolin-like domain IPR012990 Sec23/Sec24 beta-sandwich IPR027310 Profilin conserved site IPR029006 ADF-H/Gelsolin-like domain superfamily IPR036174 Zinc finger2C Sec23/Sec24-type superfamily IPR036175 Sec23/Sec24 helical domain superfamily IPR036180 Gelsolin-like domain…	0.0	CE27230	sec-23	Protein transport protein SEC23	0.0	Q7SZE5	Danio rerio	Protein transport protein Sec23A	0.0	-0.105838	1	-0.366206	0.642256	-0.437182	0.422332	387.527	332.984		207.353	334.603	440.789	491.088	475.85	435.781		243.283	258.506	363.783	359.132	367.762	305.668
Mg9731	4522	NXFT01003593.1.9387_g	IPR002048 EF-hand domain IPR010255 Haem peroxidase superfamily IPR011992 EF-hand domain pair IPR019791 Haem peroxidase2C animal-type IPR034821 Dual oxidase2C peroxidase domain IPR037120 Haem peroxidase domain superfamily2C animal type	0.0	Minc3s03402g33738	IPR002048 EF-hand domain IPR010255 Haem peroxidase superfamily IPR011992 EF-hand domain pair IPR019791 Haem peroxidase2C animal-type IPR034821 Dual oxidase2C peroxidase domain IPR037120 Haem peroxidase domain superfamily2C animal type	0.0	CE28463	bli-3	Dual oxidase 1	0.0	O61213	Caenorhabditis elegans	Dual oxidase 1	0.0	-0.593436	0.929676	-0.146457	0.957601	-0.860583	0.238555	7.88755	6.13965		19.0923	23.9361	23.5496	38.0217	88.9237	78.4602		18.7412	9.83061	26.6669	28.6351	44.5214	47.9591
Mg759	4200	NXFT01003203.1.8367_g	IPR000209 Peptidase S8/S53 domain IPR002884 P domain IPR006212 Furin-like repeat IPR008979 Galactose-binding-like domain superfamily IPR009030 Growth factor receptor cysteine-rich domain superfamily IPR015500 Peptidase S82C subtilisin-related IPR022398 Peptidase S82C subtilisin2C His-active site IPR023827 Peptidase S82C subtilisin2C Asp-active site IPR023828 Peptidase S82C subtilisin2C Ser-active…	0.0	Minc3s00005g00322	IPR000209 Peptidase S8/S53 domain IPR002884 P domain IPR006212 Furin-like repeat IPR008979 Galactose-binding-like domain superfamily IPR009030 Growth factor receptor cysteine-rich domain superfamily IPR015500 Peptidase S82C subtilisin-related IPR022398 Peptidase S82C subtilisin2C His-active site IPR023827 Peptidase S82C subtilisin2C Asp-active site IPR023828 Peptidase S82C subtilisin2C Ser-active…	0.0	CE11728	bli-4	Endoprotease bli-4	0.0	P51559	Caenorhabditis elegans	Endoprotease bli-4	0.0	0.0497307	1	-0.00110859	1	0.0027494	1	155.575	179.118		115.576	74.2345	183.74	128.871	250.249	204.724		84.1142	113.673	155.963	157.004	233.226	222.833
Enzymes involved in cuticle shedding (nas-37)
Mg14054	2255	NXFT01003943.1.10281_g	IPR001506 Peptidase M12A IPR006026 Peptidase 2C metallopeptidase IPR013032 EGF-like 2C conserved site IPR024079 Metallopeptidase 2C catalytic domain superfamily	0.0	Minc3s01841g26671	IPR001506 Peptidase M12A IPR006026 Peptidase2C metallopeptidase IPR013032 EGF-like2C conserved site IPR024079 Metallopeptidase2C catalytic domain superfamily	0.0	CE38034	nas-37	Zinc metalloproteinase nas-37	2e-36	Q93243	Caenorhabditis elegans	Zinc metalloproteinase nas-37	5e-35	-1.58916	1	0.325402	1	-0.52205	1	5.62496	6.16373		0.266188	9.14239	0.266188	2.62591	2.16599	2.82993		3.10849	0.266188	0.266188	3.10307	1.68236	1.93962
Mg15354	2504	NXFT01001859.1.4834_g		4.41e-170	Minc3s01841g26671	IPR001506 Peptidase M12A IPR006026 Peptidase2C metallopeptidase IPR013032 EGF-like2C conserved site IPR024079 Metallopeptidase2C catalytic domain superfamily	2.08e-166	CE38034	nas-37	Zinc metalloproteinase nas-37	2e-40	Q93243	Caenorhabditis elegans	Zinc metalloproteinase nas-37	4e-39	-0.989206	1	1.31829	0.860004	1.88723	0.86154	4.10069	3.78064		0.266188	6.18366	3.99154	0.266188	1.05777	1.22759		3.10849	0.266188	5.68171	4.52152	5.93086	1.10291
Mg19600	3540	NXFT01001481.1.3876_g	IPR001506 Peptidase M12A IPR006026 Peptidase 2C metallopeptidase IPR024079 Metallopeptidase 2C catalytic domain superfamily	0.0	Minc3s01841g26671	IPR001506 Peptidase M12A IPR006026 Peptidase2C metallopeptidase IPR013032 EGF-like2C conserved site IPR024079 Metallopeptidase2C catalytic domain superfamily	3.73e-165	CE38034	nas-37	Zinc metalloproteinase nas-37	1e-34	Q93243	Caenorhabditis elegans	Zinc metalloproteinase nas-37	2e-33	-8.94051	0.44125	0.0658381	1	0.0285483	1	5.00572	2.40856		4.9727	12.1011	9.57957	6.16548	3.74916	0.907123		0.266188	0.266188	7.0356	9.48607	1.68236	3.1947
Mg23167	2167	NXFT01001574.1.4092_g	IPR000742 EGF-like domain IPR000859 CUB domain IPR000884 Thrombospondin type-1 (TSP1) repeat IPR001506 Peptidase M12A IPR006026 Peptidase 2C metallopeptidase IPR013032 EGF-like 2C conserved site IPR017050 Metallopeptidase 2C nematode IPR024079 Metallopeptidase 2C catalytic domain superfamily IPR034035 Astacin-like metallopeptidase domain IPR035914 Spermadhesin 2C CUB domain superfamily IPR036383 …	0.0	Minc3s00083g04000	IPR000859 CUB domain IPR000884 Thrombospondin type-1 (TSP1) repeat IPR001506 Peptidase M12A IPR006026 Peptidase2C metallopeptidase IPR013032 EGF-like2C conserved site IPR024079 Metallopeptidase2C catalytic domain superfamily IPR034035 Astacin-like metallopeptidase domain IPR035914 Spermadhesin2C CUB domain superfamily IPR036383 Thrombospondin type-1 (TSP1) repeat superfamily	0.0	CE38034	nas-37	Zinc metalloproteinase nas-37	5e-157	Q93243	Caenorhabditis elegans	Zinc metalloproteinase nas-37	7e-134	0	1	0	1	-3.26855	0.00189961	0.575806	0.651334		0.266188	0.266188	0.266188	0.266188	101.906	109.866		0.266188	0.266188	0.266188	0.266188	13.7198	8.63337
Mg23465	1315	NXFT01000159.1.4157_g	IPR001506 Peptidase M12A IPR024079 Metallopeptidase 2C catalytic domain superfamily	0.0	Minc3s02270g29187	IPR001506 Peptidase M12A IPR013032 EGF-like2C conserved site IPR024079 Metallopeptidase2C catalytic domain superfamily	1.31e-122	CE31417	nas-37	Zinc metalloproteinase nas-37	1e-42	Q93243	Caenorhabditis elegans	Zinc metalloproteinase nas-37	2e-41	0	1	5.4378	0.788013	-5.16689	0.767217	0.599623	0.506904		0.266188	0.266188	0.266188	0.266188	1.37441	0.266188		0.266188	0.266188	0.266188	1.68463	0.266188	0.266188
Mg24076	1617	NXFT01003646.1.9522_g	IPR000859 CUB domain IPR035914 Spermadhesin 2C CUB domain superfamily	0.0	Minc3s00020g01280	IPR001506 Peptidase M12A IPR006026 Peptidase2C metallopeptidase IPR024079 Metallopeptidase2C catalytic domain superfamily IPR034035 Astacin-like metallopeptidase domain	3.13e-149	CE38034	nas-37	Zinc metalloproteinase nas-37	5e-46	Q93243	Caenorhabditis elegans	Zinc metalloproteinase nas-37	8e-45	-0.894173	1	-6.00619	0.67858	-2.36447	0.0195637	0.76634	0.699477		4.9727	0.266188	0.266188	2.62591	228.401	247.026		0.266188	2.99888	0.266188	0.266188	57.975	34.5716
Mg26871	2659	NXFT01001373.1.3503_g	IPR001506 Peptidase M12A IPR006026 Peptidase 2C metallopeptidase IPR007021 Domain of unknown function DUF659 IPR012337 Ribonuclease H-like superfamily IPR013032 EGF-like 2C conserved site IPR024079 Metallopeptidase 2C catalytic domain superfamily IPR033375 CGG triplet repeat-binding protein 1	0.0	Minc3s01841g26671	IPR001506 Peptidase M12A IPR006026 Peptidase2C metallopeptidase IPR013032 EGF-like2C conserved site IPR024079 Metallopeptidase2C catalytic domain superfamily	0.0	CE38034	nas-37	Zinc metalloproteinase nas-37	6e-41	Q93243	Caenorhabditis elegans	Zinc metalloproteinase nas-37	2e-39	6.38727	0.956028	1.51034	0.88948	-0.0899221	1	1.36176	1.56605		0.266188	0.266188	2.12886	0.266188	2.32431	1.22759		0.266188	2.99888	1.62007	4.52152	3.09852	0.266188
Mg5842	4296	NXFT01001590.1.4144_g	IPR001506 Peptidase M12A IPR006026 Peptidase 2C metallopeptidase IPR024079 Metallopeptidase 2C catalytic domain superfamily	0.0	Minc3s01841g26671	IPR001506 Peptidase M12A IPR006026 Peptidase2C metallopeptidase IPR013032 EGF-like2C conserved site IPR024079 Metallopeptidase2C catalytic domain superfamily	0.0	CE38034	nas-37	Zinc metalloproteinase nas-37	4e-41	Q93243	Caenorhabditis elegans	Zinc metalloproteinase nas-37	2e-39	6.38761	0.956028	6.42322	0.777574	-0.560634	1	2.64786	2.55299		0.266188	0.266188	0.266188	0.266188	2.79926	2.82993		0.266188	2.99888	0.266188	3.10307	2.0364	1.93962
Molting defective (mlt) and molting defective-like (mltn) genes
Mg4600	2493	NXFT01001735.1.4435_g	IPR002110 Ankyrin repeat IPR020683 Ankyrin repeat-containing domain IPR036770 Ankyrin repeat-containing domain superfamily	0.0	Minc3s00595g14849	IPR002110 Ankyrin repeat IPR020683 Ankyrin repeat-containing domain IPR036770 Ankyrin repeat-containing domain superfamily	0.0	CE36466	mlt-2		4e-13	P56520	Gallus gallus	Histone deacetylase 3	2e-11	-0.379091	1	-0.579344	0.803183	-0.305706	1	9.86434	14.6128		12.0325	6.18366	13.3049	12.0648	13.2482	14.6872		3.10849	11.197	8.38948	8.77685	9.47128	13.2353
Mg12344	914	NXFT01001273.1.3234_g	IPR003582 ShKT domain IPR010255 Haem peroxidase superfamily IPR019791 Haem peroxidase 2C animal type IPR037120 Haem peroxidase domain superfamily 2C animal type	4.38e-176	Minc3s00086g04118	IPR003582 ShKT domain IPR010255 Haem peroxidase superfamily IPR019791 Haem peroxidase2C animal-type IPR037120 Haem peroxidase domain superfamily2C animal type	1.10e-72	CE05084	mlt-7	Peroxidase mlt-7 light chain	5e-20	Q23490	Caenorhabditis elegans	Peroxidase mlt-7	9e-19	1.5718	0.892552	0.100184	1	0.124207	1	2.8384	2.48077		4.9727	0.266188	15.1676	8.5252	32.8795	23.0194		8.7931	7.09792	9.74336	15.8691	26.4653	34.5716
Mg6363	1247	NXFT01001273.1.3233_g	IPR010255 Haem peroxidase superfamily IPR019791 Haem peroxidase 2C animal type IPR037120 Haem peroxidase domain superfamily 2C animal type	0.0	Minc3s00086g04118	IPR003582 ShKT domain IPR010255 Haem peroxidase superfamily IPR019791 Haem peroxidase2C animal-type IPR037120 Haem peroxidase domain superfamily2C animal type	0.0	CE05084	mlt-7	Peroxidase mlt-7 light chain	3e-149	Q23490	Caenorhabditis elegans	Peroxidase mlt-7	5e-148	-8.31217	0.560584	-1.58916	0.749051	0.419407	1	3.62435	2.04749		4.9727	6.18366	9.57957	14.4245	23.8554	13.0849		0.266188	0.266188	0.266188	8.06763	23.633	25.7861
Mg10333	874	NXFT01001273.1.3234_g	IPR003582 ShKT domain IPR010255 Haem peroxidase superfamily IPR019791 Haem peroxidase 2C animal type IPR037120 Haem peroxidase domain superfamily 2C animal type	0.0	Minc3s00086g04118	IPR003582 ShKT domain IPR010255 Haem peroxidase superfamily IPR019791 Haem peroxidase2C animal-type IPR037120 Haem peroxidase domain superfamily2C animal type	8.25e-167	CE05084	mlt-7	Peroxidase mlt-7 light chain	7e-115	Q23490	Caenorhabditis elegans	Peroxidase mlt-7	1e-113	0	1	-0.475884	0.975391	0.626741	0.983868	1.40939	1.25312		0.266188	0.266188	2.12886	6.16548	10.5568	9.88021		0.266188	0.266188	5.00477	0.97541	15.136	16.1638
Mg22070	1002	NXFT01002275.1.6005_g	IPR028996 Ganglioside GM2 activator IPR036846 GM2-AP 2C lipid-recognition domain superfamily	0.0	Minc3s03245g33273	IPR028996 Ganglioside GM2 activator IPR036846 GM2-AP2C lipid-recognition domain superfamily	0.0	CE37162	mlt-8		1e-162					0.678992	1	-0.114356	1	-2.6329	0.000341297	1.40939	0.940193		4.9727	0.266188	3.99154	9.70506	274.946	271.702		3.10849	5.73157	7.71254	4.52152	48.0619	40.4287
Mg8414	1580	NXFT01002092.1.5404_g	IPR013320 Concanavalin A-like lectin/glucanase domain superfamily	0.0	Minc3s02767g31488	IPR013320 Concanavalin A-like lectin/glucanase domain superfamily	0.0	CE23634	mlt-9		1e-115					0.0931342	1	3.18718	0.167804	-2.36638	0.00588267	4.10069	4.55093		2.61945	0.266188	1.19753	0.266188	119.004	130.376		0.266188	2.99888	5.68171	4.52152	25.0491	23.6943
Mg242	2308	NXFT01004003.1.10448_g	IPR006954 Moulting cycle MLT-10-like protein	0.0	Minc3s03603g34292		5.43e-77	CE19349	mlt-10		8e-46					-0.55154	0.956028	0.797326	0.675316	-0.520581	0.75116	24.3211	26.8653		19.0923	18.0186	8.64823	15.6044	34.621	31.9925		8.7931	16.6623	23.9591	17.2875	22.9249	23.6943
Mg503	2505	NXFT01004158.1.10823_g	IPR006954 Moulting cycle MLT-10-like protein	0.0	Minc3s00376g11261	IPR006954 Moulting cycle MLT-10-like protein	3.86e-178	CE19349	mlt-10		1e-45					-0.534461	0.940175	-0.25054	0.917961	-1.45369	0.0698855	38.2063	40.7064		33.2118	44.6472	13.3049	12.0648	31.9296	38.0813		31.5315	22.1277	6.35865	15.1598	10.1794	15.7455
Mg6486	993	NXFT01001952.1.5052_g	IPR001253 Translation initiation factor 1A (eIF-1A) IPR006196 RNA-binding domain 2C S1 2C IF1 type IPR012340 Nucleic acid-binding 2C OB-fold IPR018104 Translation initiation factor 1A (eIF-1A) 2C conserved site IPR018997 PUB domain IPR036339 PUB-like domain superfamily	1.13e-107	Minc3s07270g40923		3.71e-28	CE19349	mlt-10		4e-14					0.371941	1	0.396142	0.901421	-0.373944	0.974826	10.4836	14.1314		19.0923	9.14239	5.85422	13.2446	15.7813	18.8533		27.2681	9.83061	16.5128	8.06763	17.2602	9.47009
Mg11698	291	NXFT01004003.1.10448_g	IPR006954 Moulting cycle MLT-10-like protein	1.87e-115	Minc3s06640g40109		3.17e-33	CE20132	mltn-3		5e-15					0.717949	1	-2.14563	0.782433	-1.95759	0.725295	1.05214	0.555047		2.61945	0.266188	3.0602	3.80577	21.4807	18.8533		4.52965	0.266188	0.266188	1.68463	8.7632	1.93962
Mg26527	648	NXFT01000344.1.9045_g	IPR001253 Translation initiation factor 1A (eIF-1A) IPR006196 RNA-binding domain 2C S1 2C IF1 type IPR006954 Moulting cycle MLT-10-like protein IPR012340 Nucleic acid-binding 2C OB-fold IPR018104 Translation initiation factor 1A (eIF-1A) 2C conserved site	0.0	Minc3s00624g15262	IPR006954 Moulting cycle MLT-10-like protein	7.21e-66	CE20132	mltn-3		2e-35					-0.83041	1	1.75095	0.788013	-2.25404	0.674236	2.6955	1.83084		7.32596	0.266188	1.19753	0.266188	17.0478	12.7644		1.68734	2.99888	1.62007	2.39385	3.45257	3.1947
Mg11119	937	NXFT01004003.1.10448_g	IPR006954 Moulting cycle MLT-10-like protein	0.0	Minc3s00279g09273	IPR006954 Moulting cycle MLT-10-like protein	1.14e-110	CE44890	mltn-6		6e-41					6.98935	0.88673	-0.103988	1	-2.78231	0.00369194	3.00512	1.83084		0.266188	0.266188	7.71689	6.16548	110.771	142.233		4.52965	0.266188	5.00477	8.06763	19.7385	17.4189
Mg37510	485	NXFT01000666.1.1553_g	IPR006954 Moulting cycle MLT-10-like protein	0.0	Minc3s00624g15262	IPR006954 Moulting cycle MLT-10-like protein	3.27e-90	CE44890	mltn-6		7e-23					0	1	0	1	-2.59268	0.152697	0.432906	0.506904		0.266188	0.266188	0.266188	0.266188	45.0699	44.1702		0.266188	0.266188	0.266188	0.266188	9.47128	5.70486
Mg3370	2074	NXFT01000154.1.4016_g	IPR006954 Moulting cycle MLT-10-like protein	0.0	Minc3s00266g08968	IPR006954 Moulting cycle MLT-10-like protein	0.0	CE32632	mltn-9		1e-63					0	1	-0.149847	1	-2.7876	0.241131	4.00542	3.56399		0.266188	0.266188	3.0602	0.266188	115.363	123.005		0.266188	0.266188	2.97395	0.266188	28.5895	6.12322
Mg39739	1834	NXFT01003015.1.7927_g	IPR006954 Moulting cycle MLT-10-like protein	0.0	Minc3s00857g18153	IPR006954 Moulting cycle MLT-10-like protein	0.0	CE32632	mltn-9		3e-64					-0.80886	1	-0.0200593	1	-4.30753	0.456962	1.29031	1.20498		4.9727	0.266188	1.19753	1.44605	8.81531	14.0463		3.10849	0.266188	1.62007	0.97541	1.32831	0.266188
Mg12047	2549	NXFT01002408.1.6404_g		0.0	Minc3s01452g23926		3.62e-147	CE44210	mltn-13		7e-43					1.11988	0.988449	-6.50695	0.49082	-2.44103	0.330476	2.74313	2.67335		4.9727	0.266188	3.0602	0.266188	36.9957	27.8264		3.10849	8.46427	0.266188	0.266188	6.63894	5.70486
Mg22394	1279	NXFT01002001.1.5175_g		0.0	Minc3s00117g05085		2.27e-132	CE44210	mltn-13		3e-42					0	1	5.39143	0.788013	-5.90492	0.734251	1.40939	1.10869		0.266188	0.266188	0.266188	0.266188	2.16599	0.266188		0.266188	0.266188	1.62007	0.266188	0.266188	0.266188
Mg27205	814	NXFT01003573.1.9352_g	IPR006954 Moulting cycle MLT-10-like protein	0.0	Minc3s00843g18006	IPR006954 Moulting cycle MLT-10-like protein	6.47e-83	CE44210	mltn-13		5e-19					0	1	-0.48145	1	-0.611046	1	1.17123	1.63827		0.266188	0.266188	3.0602	0.266188	5.80728	4.43226		0.266188	0.266188	1.62007	0.97541	4.51469	2.35798
Mg33317	637	NXFT01003573.1.9352_g	IPR006954 Moulting cycle MLT-10-like protein	0.0	Minc3s03009g32414		3.97e-80	CE44210	mltn-13		1e-20					0	1	-1.46121	0.912598	-0.914475	1	0.76634	0.892049		0.266188	0.266188	2.12886	0.266188	2.95758	6.0346		0.266188	0.266188	0.943129	0.266188	3.45257	1.52127
Mg4836	906	NXFT01004031.1.10532_g		0.0	Minc3s02884g31955		7.15e-83	CE44210	mltn-13		2e-41					0.754303	1	0.606761	0.926023	-0.647232	0.965984	14.2943	13.7222		9.67922	0.266188	2.12886	4.98562	13.5648	8.27787		14.4777	2.99888	1.62007	8.77685	5.57682	8.63337

## Sheet: detox
Table S4 detox. List of M. graminicola transcripts encoding predicted detoxification enzymes and comparison of their expression during nematode infection of resistant plants versus susceptible plants.
M. graminicola transcript	Length	Best blastn hit			Best blastx hit											edgeR						Normalised CPM value
		M. graminicola			M. incognita			C. elegans				Uniprot				LogFC (Tog2 vs Nip2)	FDR (Padj)	LogFC (Tog4 vs Nip4)	FDR (Padj)	LogFC (Tog8 vs Nip8)	FDR (Padj)	pre-J2			in Nipponbare (S)							in Tog5681 (R )
		CDS	Fonction	e-value	Protein	Fonction	e-value	Protein	Class	Fonction	e-value	Protein	Species	fonction	e-value							J2A	J2B		Nip2A	Nip2B	Nip4A	Nip4B	Nip8A	Nip8B		Tog2A	Tog2B	Tog4A	Tog4B	Tog8A	Tog8B
Glutathione S transferase
Mg11365	338	NXFT01002419.1.618_g	IPR004045 Glutathione S-transferase 2C N-terminal IPR004046 Glutathione S-transferase 2C C-terminal IPR010987 Glutathione S-transferase 2C C-terminal-like IPR036249 Thioredoxin-like superfamily IPR036282 Glutathione S-transferase 2C C-terminal domain superfamily IPR040079 Glutathione Transferase family	2.11e-140	Minc3s00008g00537	IPR004045 Glutathione S-transferase2C N-terminal IPR004046 Glutathione S-transferase2C C-terminal IPR010987 Glutathione S-transferase2C C-terminal-like IPR036249 Thioredoxin-like superfamily IPR036282 Glutathione S-transferase2C C-terminal domain superfamily	7.35e-52	CE04807	gst-9	Probable glutathione S-transferase 9	3e-22	P46436	Ascaris suum	Glutathione S-transferase 1	2e-22	1.33686	0.956028	0.977133	0.793951	-0.364248	1	14.2943	14.4203		0.266188	6.18366	3.99154	3.80577	4.54075	7.31647		5.9508	8.46427	12.4511	2.39385	5.22278	4.03142
Mg12120	900	NXFT01002569.1.6565_g	IPR004045 Glutathione S-transferase 2C N-terminal IPR004046 Glutathione S-transferase 2C C-terminal IPR010987 Glutathione S-transferase 2C C-terminal-like IPR036249 Thioredoxin-like superfamily IPR036282 Glutathione S-transferase 2C C-terminal domain superfamily IPR040079 Glutathione Transferase family	0.0	Minc3s00012g00790	IPR004045 Glutathione S-transferase2C N-terminal IPR004046 Glutathione S-transferase2C C-terminal IPR010987 Glutathione S-transferase2C C-terminal-like IPR036249 Thioredoxin-like superfamily IPR036282 Glutathione S-transferase2C C-terminal domain superfamily IPR040079 Glutathione Transferase family	1.79e-147	CE06155	gst-4	Glutathione S-transferase 4	4e-23	Q21355	Caenorhabditis elegans	Glutathione S-transferase 4	6e-22	0.391291	1	2.61578	0.290992	0.98563	0.759526	39.2781	39.6714		4.9727	6.18366	3.0602	0.266188	2.32431	3.47086		3.10849	11.197	10.4203	8.77685	5.93086	4.86814
Mg1521	510	NXFT01002419.1.618_g	IPR004045 Glutathione S-transferase 2C N-terminal IPR004046 Glutathione S-transferase 2C C-terminal IPR010987 Glutathione S-transferase 2C C-terminal-like IPR036249 Thioredoxin-like superfamily IPR036282 Glutathione S-transferase 2C C-terminal domain superfamily IPR040079 Glutathione Transferase family	1.18e-134	Minc3s00008g00537	IPR004045 Glutathione S-transferase2C N-terminal IPR004046 Glutathione S-transferase2C C-terminal IPR010987 Glutathione S-transferase2C C-terminal-like IPR036249 Thioredoxin-like superfamily IPR036282 Glutathione S-transferase2C C-terminal domain superfamily	1.33e-68	CE07054	gst-8	Probable glutathione S-transferase 8	7e-25	P91254	Caenorhabditis elegans	Probable glutathione S-transferase 8	1e-23	0.338027	1	0.616102	0.901019	0.316918	1	15.6995	12.5186		9.67922	0.266188	2.12886	8.5252	5.33233	3.47086		8.7931	4.36523	9.06642	6.64918	5.22278	5.70486
Mg19814	1454				Minc3s01667g25468	IPR004045 Glutathione S-transferase2C N-terminal IPR004046 Glutathione S-transferase2C C-terminal IPR010987 Glutathione S-transferase2C C-terminal-like IPR036249 Thioredoxin-like superfamily IPR036282 Glutathione S-transferase2C C-terminal domain superfamily IPR040079 Glutathione Transferase family	6.95e-22	CE04834	gst-11	Probable glutathione S-transferase	9e-26	Q93834	Caenorhabditis elegans	UPF0392 protein F59C6.8	1e-28	0	1	0.592954	1	8.60412	0.35504	9.72144	0.699477		0.266188	0.266188	0.266188	2.62591	0.266188	0.266188		0.266188	0.266188	3.65089	0.266188	12.3036	1.10291
Mg22697	1059				Minc3s00365g11068	IPR004045 Glutathione S-transferase2C N-terminal IPR004046 Glutathione S-transferase2C C-terminal IPR010987 Glutathione S-transferase2C C-terminal-like IPR036249 Thioredoxin-like superfamily IPR036282 Glutathione S-transferase2C C-terminal domain superfamily	1.99e-20	CE02912	gst-30	Probable glutathione S-transferase	2e-17	P46436	Ascaris suum	Glutathione S-transferase 1	1e-24	-0.83572	1	-1.57265	0.902121	-5.09819	0.73286	3.33855	1.20498		2.61945	0.266188	1.19753	1.44605	0.741139	0.907123		0.266188	1.63253	0.943129	0.266188	0.266188	0.266188
Mg29613	1238	NXFT01001833.1.4746_g	IPR004045 Glutathione S-transferase 2C N-terminal IPR004046 Glutathione S-transferase 2C C-terminal IPR010987 Glutathione S-transferase 2C C-terminal-like IPR036249 Thioredoxin-like superfamily IPR036282 Glutathione S-transferase 2C C-terminal domain superfamily	0.0	Minc3s00767g17079	IPR004045 Glutathione S-transferase2C N-terminal IPR004046 Glutathione S-transferase2C C-terminal IPR010987 Glutathione S-transferase2C C-terminal-like IPR036249 Thioredoxin-like superfamily IPR036282 Glutathione S-transferase2C C-terminal domain superfamily IPR040079 Glutathione Transferase family	0.0	CE01613	gst-5	Probable glutathione S-transferase 5	1e-50	Q09596	Caenorhabditis elegans	Probable glutathione S-transferase 5	2e-49	-1.83725	0.956028	-0.575006	0.969509	-1.86912	0.680514	2.79077	2.40856		9.67922	0.266188	2.12886	2.62591	34.146	23.6603		0.266188	2.99888	0.266188	3.10307	5.93086	10.3068
Mg3920	1840	NXFT01000334.1.8825_g		0.0	Minc3s04022g35306	IPR041291 Histone methyltransferase2C Tudor domain 1	3.36e-129	CE25559	gst-43	Probable glutathione S-transferase	2e-39	P34419	Caenorhabditis elegans	Putative esterase F42H10.6	1e-45	-0.00398785	1	-0.0112848	1	-0.0466937	1	50.6386	54.9568		33.2118	29.8535	50.5584	25.0432	57.4186	60.1936		25.8469	37.1575	28.0208	47.784	50.8942	63.0201
Mg4947	841	NXFT01003107.1.8080_g	IPR004045 Glutathione S-transferase 2C N-terminal IPR004046 Glutathione S-transferase 2C C-terminal IPR010987 Glutathione S-transferase 2C C-terminal-like IPR036249 Thioredoxin-like superfamily IPR036282 Glutathione S-transferase 2C C-terminal domain superfamily IPR040079 Glutathione Transferase family	0.0	Minc3s00048g02624	IPR004045 Glutathione S-transferase2C N-terminal IPR004046 Glutathione S-transferase2C C-terminal IPR010987 Glutathione S-transferase2C C-terminal-like IPR036249 Thioredoxin-like superfamily IPR036282 Glutathione S-transferase2C C-terminal domain superfamily IPR040079 Glutathione Transferase family	4.19e-68	CE15958	gst-38	Probable glutathione S-transferase	3e-29	P91254	Caenorhabditis elegans	Probable glutathione S-transferase 8	1e-27	1.12772	0.0436041	1.26041	0.00197819	0.32489	0.669586	217.904	305.012		106.163	124.533	157.662	145.389	377.536	401.491		217.703	284.466	381.384	344.239	470.788	504.807
Mg51589	641	NXFT01004052.1.10589_g	IPR004045 Glutathione S-transferase 2C N-terminal IPR004046 Glutathione S-transferase 2C C-terminal IPR010987 Glutathione S-transferase 2C C-terminal-like IPR036249 Thioredoxin-like superfamily IPR036282 Glutathione S-transferase 2C C-terminal domain superfamily IPR040079 Glutathione Transferase family	0.0	Minc3s01667g25468	IPR004045 Glutathione S-transferase2C N-terminal IPR004046 Glutathione S-transferase2C C-terminal IPR010987 Glutathione S-transferase2C C-terminal-like IPR036249 Thioredoxin-like superfamily IPR036282 Glutathione S-transferase2C C-terminal domain superfamily IPR040079 Glutathione Transferase family	4.24e-23	CE04807	gst-9	Probable glutathione S-transferase 9	3e-18	P46428	Anopheles gambiae	Glutathione S-transferase	4e-17	0	1	0	1	-3.28813	0.190017	0.313822	0.266188		0.266188	0.266188	0.266188	0.266188	40.0037	37.7609		0.266188	0.266188	0.266188	0.266188	2.74448	5.70486
Mg62492	547				Minc3s00008g00537	IPR004045 Glutathione S-transferase2C N-terminal IPR004046 Glutathione S-transferase2C C-terminal IPR010987 Glutathione S-transferase2C C-terminal-like IPR036249 Thioredoxin-like superfamily IPR036282 Glutathione S-transferase2C C-terminal domain superfamily	3.43e-12	CE04834	gst-11	Probable glutathione S-transferase	9e-22	P80894	Antechinus	Glutathione S-transferase	3e-19	5.43231	1	-1.21091	0.922153	-0.82121	1	0.266188	0.266188		0.266188	0.266188	11.4422	12.0648	0.266188	6.996		1.68734	0.266188	0.266188	10.1953	0.266188	4.03142
Mg67648	506				Minc3s00365g11068	IPR004045 Glutathione S-transferase2C N-terminal IPR004046 Glutathione S-transferase2C C-terminal IPR010987 Glutathione S-transferase2C C-terminal-like IPR036249 Thioredoxin-like superfamily IPR036282 Glutathione S-transferase2C C-terminal domain superfamily	2.95e-15	CE04834	gst-11	Probable glutathione S-transferase	1e-13	Q7REH6	Plasmodium yoelii	Glutathione S-transferase	3e-15	0	1	-2.42966	0.782433	-0.872998	1	0.266188	0.266188		0.266188	0.266188	11.4422	12.0648	1.69104	4.1118		0.266188	0.266188	0.266188	4.52152	0.62023	2.77634
Mg67713	1035				Minc3s00008g00537	IPR004045 Glutathione S-transferase2C N-terminal IPR004046 Glutathione S-transferase2C C-terminal IPR010987 Glutathione S-transferase2C C-terminal-like IPR036249 Thioredoxin-like superfamily IPR036282 Glutathione S-transferase2C C-terminal domain superfamily	2.66e-21	CE25050	gst-3	Glutathione S-transferase 3	7e-23	P46428	Anopheles gambiae	Glutathione S-transferase	4e-27	-8.40868	0.758293	-4.94287	0.322264	-1.26098	0.910725	0.266188	0.266188		0.266188	12.1011	2.12886	42.7411	8.18204	8.91881		0.266188	0.266188	0.266188	1.68463	3.80661	3.61306
Mg68277	998				Minc3s00365g11065	IPR004045 Glutathione S-transferase2C N-terminal IPR004046 Glutathione S-transferase2C C-terminal IPR010987 Glutathione S-transferase2C C-terminal-like IPR036249 Thioredoxin-like superfamily IPR036282 Glutathione S-transferase2C C-terminal domain superfamily IPR040079 Glutathione Transferase family	1.36e-17	CE04834	gst-11	Probable glutathione S-transferase	7e-27	P46428	Anopheles gambiae	Glutathione S-transferase	2e-29	0	1	-9.79594	0.323127	-0.686774	1	0.266188	0.266188		0.266188	0.266188	3.99154	26.2231	0.741139	6.0346		0.266188	0.266188	0.266188	0.266188	2.39044	1.93962
Mg68458	654				Minc3s00008g00537	IPR004045 Glutathione S-transferase2C N-terminal IPR004046 Glutathione S-transferase2C C-terminal IPR010987 Glutathione S-transferase2C C-terminal-like IPR036249 Thioredoxin-like superfamily IPR036282 Glutathione S-transferase2C C-terminal domain superfamily	3.20e-13	CE04834	gst-11	Probable glutathione S-transferase	1e-22	Q8MU52	Plasmodium falciparum	Glutathione S-transferase	5e-19	0.145669	1	-0.934094	0.912783	-1.1716	0.953967	0.266188	0.266188		4.9727	0.266188	11.4422	13.2446	0.899456	19.4942		3.10849	2.99888	2.97395	10.1953	0.266188	9.05173
Mg71267	750							CE09995	gst-19	Probable glutathione S-transferase	2e-15	P46088	Ommastrephes	Glutathione S-transferase	8e-21	0	1	-0.270776	1	0.867028	0.96536	0.266188	0.266188		0.266188	0.266188	1.19753	12.0648	2.48263	11.4825		0.266188	0.266188	6.35865	4.52152	14.0738	10.7252
Mg72136	781				Minc3s01667g25468	IPR004045 Glutathione S-transferase2C N-terminal IPR004046 Glutathione S-transferase2C C-terminal IPR010987 Glutathione S-transferase2C C-terminal-like IPR036249 Thioredoxin-like superfamily IPR036282 Glutathione S-transferase2C C-terminal domain superfamily IPR040079 Glutathione Transferase family	1.40e-16	CE17270	gst-23	Probable glutathione S-transferase	8e-22	Q8MU52	Plasmodium falciparum	Glutathione S-transferase	5e-26	5.41529	1	-1.53086	0.788013	1.44712	0.841469	0.266188	0.266188		0.266188	0.266188	2.12886	10.8849	2.32431	13.0849		0.266188	1.63253	0.266188	4.52152	21.1547	19.5107
Mg72931	730				Minc3s00008g00523	IPR004045 Glutathione S-transferase2C N-terminal IPR004046 Glutathione S-transferase2C C-terminal IPR010987 Glutathione S-transferase2C C-terminal-like IPR036249 Thioredoxin-like superfamily IPR036282 Glutathione S-transferase2C C-terminal domain superfamily IPR040079 Glutathione Transferase family	7.71e-24	CE22420	gst-39	Probable glutathione S-transferase	9e-30	P46428	Anopheles gambiae	Glutathione S-transferase	1e-29	-0.0135775	1	-3.67419	0.724819	-0.541776	1	0.266188	0.266188		0.266188	6.18366	0.266188	36.8418	1.84936	7.31647		0.266188	5.73157	0.266188	3.10307	5.22278	1.10291
Superoxide dismutase
Mg1860	2073	NXFT01001420.1.3667_g		0.0	Minc3s01044g20143	IPR001424 Superoxide dismutase2C copper/zinc binding domain IPR018152 Superoxide dismutase2C copper/zinc2C binding site IPR024134 Superoxide dismutase (Cu/Zn) / superoxide dismutase copper chaperone IPR036423 Superoxide dismutase-like2C copper/zinc binding domain superfamily	9.84e-36	CE20508	sod-1	Superoxide dismutase [Cu-Zn]	3e-25	P34697	Caenorhabditis elegans	Superoxide dismutase [Cu-Zn]	9e-24	0.0785244	1	-0.532068	0.19911	0.855964	0.00749447	165.674	147.488		235.592	231.047	1031.26	753.016	1317.46	1230.86		220.545	272.169	565.512	669.062	2524.59	2087.46
Mg3721	1650	NXFT01000798.1.2033_g	IPR001189 Manganese/iron superoxide dismutase IPR019831 Manganese/iron superoxide dismutase 2C N-terminal IPR019832 Manganese/iron superoxide dismutase 2C C-terminal IPR019833 Manganese/iron superoxide dismutase 2C binding site IPR036314 Manganese/iron superoxide dismutase 2C C-terminal domain superfamily IPR036324 Manganese/iron superoxide dismutase 2C N-terminal domain superfamily	0.0	Minc3s03341g33565	IPR001189 Manganese/iron superoxide dismutase IPR019831 Manganese/iron superoxide dismutase2C N-terminal IPR019832 Manganese/iron superoxide dismutase2C C-terminal IPR019833 Manganese/iron superoxide dismutase2C binding site IPR036314 Manganese/iron superoxide dismutase2C C-terminal domain superfamily IPR036324 Manganese/iron superoxide dismutase2C N-terminal domain superfamily	2.27e-115	CE08002	sod-3	Superoxide dismutase [Mn] 2, mitochondrial	5e-79	P38681	Neurospora crassa	Nitrite reductase [NAD(P)H]	8e-78	-0.295994	0.956028	0.205124	0.797785	-0.105314	1	49.4954	53.8014		59.0976	59.4409	47.7644	75.7772	105.547	111.789		47.1642	49.4547	76.0835	65.5146	102.584	99.4173
Mg63482	490				Minc3s00689g16100	IPR001189 Manganese/iron superoxide dismutase IPR019831 Manganese/iron superoxide dismutase2C N-terminal IPR019832 Manganese/iron superoxide dismutase2C C-terminal IPR019833 Manganese/iron superoxide dismutase2C binding site IPR036314 Manganese/iron superoxide dismutase2C C-terminal domain superfamily IPR036324 Manganese/iron superoxide dismutase2C N-terminal domain superfamily	2.45e-20	CE08002	sod-3	Superoxide dismutase [Mn] 2, mitochondrial	4e-19	P31108	Legionella pneumophila	Superoxide dismutase [Fe]	1e-56	-7.24991	0.907918	-1.21633	0.831693	-2.62479	0.682445	0.266188	0.266188		4.9727	0.266188	3.99154	9.70506	14.9897	23.9808		0.266188	0.266188	1.62007	4.52152	0.266188	6.54157
Mg67528	741				Minc3s01044g20143	IPR001424 Superoxide dismutase2C copper/zinc binding domain IPR018152 Superoxide dismutase2C copper/zinc2C binding site IPR024134 Superoxide dismutase (Cu/Zn) / superoxide dismutase copper chaperone IPR036423 Superoxide dismutase-like2C copper/zinc binding domain superfamily	4.26e-16	CE20508	sod-1	Superoxide dismutase [Cu-Zn]	7e-15	Q01137	Schistosoma mansoni	Superoxide dismutase [Cu-Zn]	9e-20	0	1	-2.24804	0.784444	-2.73796	0.731194	0.266188	0.266188		0.266188	0.266188	2.12886	12.0648	10.0818	18.2124		0.266188	0.266188	0.266188	3.10307	0.266188	4.44978
Mg67851	656				Minc3s03341g33565	IPR001189 Manganese/iron superoxide dismutase IPR019831 Manganese/iron superoxide dismutase2C N-terminal IPR019832 Manganese/iron superoxide dismutase2C C-terminal IPR019833 Manganese/iron superoxide dismutase2C binding site IPR036314 Manganese/iron superoxide dismutase2C C-terminal domain superfamily IPR036324 Manganese/iron superoxide dismutase2C N-terminal domain superfamily	8.61e-35	CE08002	sod-3	Superoxide dismutase [Mn] 2, mitochondrial	1e-33	P31108	Legionella pneumophila	Superoxide dismutase [Fe]	2e-63	0	1	-2.90717	0.782433	-8.98937	0.283624	0.266188	0.266188		0.266188	0.266188	3.99154	7.34534	4.38243	13.0849		0.266188	0.266188	0.266188	1.68463	0.266188	0.266188
Mg68297	789				Minc3s08143g41941	IPR001424 Superoxide dismutase2C copper/zinc binding domain IPR018152 Superoxide dismutase2C copper/zinc2C binding site IPR024134 Superoxide dismutase (Cu/Zn) / superoxide dismutase copper chaperone IPR036423 Superoxide dismutase-like2C copper/zinc binding domain superfamily	2.74e-64	CE23550	sod-1	Superoxide dismutase [Cu-Zn]	2e-55	O73872	Danio rerio	Superoxide dismutase [Cu-Zn]	3e-71	0	1	-9.50357	0.334138	-1.66093	0.902523	0.266188	0.266188		0.266188	0.266188	2.12886	22.6835	2.48263	9.88021		0.266188	0.266188	0.266188	0.266188	3.09852	1.10291
Peroxiredoxin
Mg1129	1331	NXFT01000317.1.8349_g	IPR000866 Alkyl hydroperoxide reductase subunit C/ Thiol specific antioxidant IPR013766 Thioredoxin domain IPR019479 Peroxiredoxin 2C C-terminal IPR024706 Peroxiredoxin 2C AhpC-type IPR036249 Thioredoxin-like superfamily	0.0	Minc3s00566g14367	IPR000866 Alkyl hydroperoxide reductase subunit C/ Thiol specific antioxidant IPR013766 Thioredoxin domain IPR019479 Peroxiredoxin2C C-terminal IPR024706 Peroxiredoxin2C AhpC-type IPR036249 Thioredoxin-like superfamily	1.74e-116	CE00657	prdx-3	Probable peroxiredoxin	4e-79	Q21824	Caenorhabditis elegans	Probable peroxiredoxin prdx-3	7e-78	0.135635	1	0.158535	0.847559	0.384765	0.652258	81.3385	81.4837		68.5107	106.781	143.692	127.691	161.75	151.847		84.1142	106.841	171.532	131.472	190.387	219.068
Mg11738	785				Minc3s00365g11069	IPR000866 Alkyl hydroperoxide reductase subunit C/ Thiol specific antioxidant IPR013766 Thioredoxin domain IPR019479 Peroxiredoxin2C C-terminal IPR024706 Peroxiredoxin2C AhpC-type IPR036249 Thioredoxin-like superfamily	1.33e-70	CE32361	prdx-2	Probable peroxiredoxin	1e-64	Q8K3U7	Cricetulus griseus	Peroxiredoxin-2	1e-75	-8.19806	0.849654	0	1	0	1	18.8909	4.02135		9.67922	0.266188	0.266188	0.266188	0.266188	0.266188		0.266188	0.266188	0.266188	0.266188	0.266188	0.266188
Mg1499	1338	NXFT01002667.1.7027_g	IPR000866 Alkyl hydroperoxide reductase subunit C/ Thiol specific antioxidant IPR013766 Thioredoxin domain IPR019479 Peroxiredoxin 2C C-terminal IPR024706 Peroxiredoxin 2C AhpC-type IPR036249 Thioredoxin-like superfamily	0.0	Minc3s00970g19437	IPR000866 Alkyl hydroperoxide reductase subunit C/ Thiol specific antioxidant IPR013766 Thioredoxin domain IPR019479 Peroxiredoxin2C C-terminal IPR024706 Peroxiredoxin2C AhpC-type IPR036249 Thioredoxin-like superfamily	1.87e-106	CE32361	prdx-2	Probable peroxiredoxin	5e-76	Q9NL98	Ascaris suum	Peroxiredoxin	6e-81	-0.0538576	1	0.133491	0.954834	0.417206	0.746879	104.441	112.584		190.88	68.3171	228.444	191.403	354.263	346.371		133.855	119.138	253.442	207.359	491.677	443.727
Mg47934	620				Minc3s00365g11069	IPR000866 Alkyl hydroperoxide reductase subunit C/ Thiol specific antioxidant IPR013766 Thioredoxin domain IPR019479 Peroxiredoxin2C C-terminal IPR024706 Peroxiredoxin2C AhpC-type IPR036249 Thioredoxin-like superfamily	4.42e-76	CE41559	prdx-2	Probable peroxiredoxin	6e-72	Q06830	Homo sapiens	Peroxiredoxin-1	1e-81	-0.0385389	1	1.18649	0.918532	2.23336	0.866845	0.456722	0.988336		0.266188	6.18366	1.19753	4.98562	0.266188	1.54806		0.266188	5.73157	1.62007	11.6137	0.974272	5.2865
Mg51430	640				Minc3s00804g17567	IPR000866 Alkyl hydroperoxide reductase subunit C/ Thiol specific antioxidant IPR013766 Thioredoxin domain IPR019479 Peroxiredoxin2C C-terminal IPR036249 Thioredoxin-like superfamily	1.48e-57	CE41559	prdx-2	Probable peroxiredoxin	2e-58	Q61171	Mus musculus	Peroxiredoxin-2	9e-68	7.96635	0.855587	-2.05836	0.55237	-1.14538	0.772646	0.313822	0.266188		0.266188	0.266188	23.5496	63.9786	28.7632	16.61		0.266188	8.46427	11.0972	10.1953	5.22278	15.7455
Mg5940	729				Minc3s00804g17567	IPR000866 Alkyl hydroperoxide reductase subunit C/ Thiol specific antioxidant IPR013766 Thioredoxin domain IPR019479 Peroxiredoxin2C C-terminal IPR036249 Thioredoxin-like superfamily	1.70e-73	CE32361	prdx-2	Probable peroxiredoxin	4e-66	Q61171	Mus musculus	Peroxiredoxin-2	1e-79	-11.654	0.0533724	-1.93415	0.695217	1.80599	0.824573	8.53061	6.90994		42.6248	65.3583	3.99154	7.34534	0.424505	0.266188		0.266188	0.266188	1.62007	1.68463	0.266188	1.10291
Mg67820	528				Minc3s00258g08778	IPR000866 Alkyl hydroperoxide reductase subunit C/ Thiol specific antioxidant IPR013766 Thioredoxin domain IPR019479 Peroxiredoxin2C C-terminal IPR024706 Peroxiredoxin2C AhpC-type IPR036249 Thioredoxin-like superfamily	2.04e-54	CE31640	prdx-6	Probable peroxiredoxin	8e-57	Q5R7E0	Pongo abelii	Peroxiredoxin-6	2e-72	6.38663	0.956028	-8.37281	0.621013	-3.35613	0.78199	0.266188	0.266188		0.266188	0.266188	3.0602	8.5252	0.899456	4.1118		0.266188	2.99888	0.266188	0.266188	0.266188	0.684547
Mg69384	892				Minc3s00365g11069	IPR000866 Alkyl hydroperoxide reductase subunit C/ Thiol specific antioxidant IPR013766 Thioredoxin domain IPR019479 Peroxiredoxin2C C-terminal IPR024706 Peroxiredoxin2C AhpC-type IPR036249 Thioredoxin-like superfamily	1.06e-95	CE32361	prdx-2	Probable peroxiredoxin	4e-89	Q9V3P0	Drosophila melanogaster	Peroxiredoxin 1	4e-98	0	1	-5.51008	0.240149	-1.43369	0.845733	0.266188	0.266188		0.266188	0.266188	2.12886	63.9786	7.23214	18.2124		0.266188	0.266188	0.266188	1.68463	5.22278	4.44978
Mg70585	836				Minc3s00365g11069	IPR000866 Alkyl hydroperoxide reductase subunit C/ Thiol specific antioxidant IPR013766 Thioredoxin domain IPR019479 Peroxiredoxin2C C-terminal IPR024706 Peroxiredoxin2C AhpC-type IPR036249 Thioredoxin-like superfamily	6.33e-90	CE32361	prdx-2	Probable peroxiredoxin	9e-88	O08807	Mus musculus	Peroxiredoxin-4	3e-119	7.38664	0.9222	-3.80867	0.711563	-0.49572	1	0.266188	0.266188		0.266188	0.266188	1.19753	9.70506	3.27421	7.95741		1.68734	4.36523	0.266188	0.97541	4.86873	3.1947
Mg75451	762				Minc3s00258g08778	IPR000866 Alkyl hydroperoxide reductase subunit C/ Thiol specific antioxidant IPR013766 Thioredoxin domain IPR019479 Peroxiredoxin2C C-terminal IPR024706 Peroxiredoxin2C AhpC-type IPR036249 Thioredoxin-like superfamily	1.10e-71	CE31640	prdx-6	Probable peroxiredoxin	8e-64	O35244	Rattus norvegicus	Peroxiredoxin-6	8e-83	8.53903	0.91787	-2.51859	0.782859	-1.76588	0.902523	0.266188	0.266188		0.266188	0.266188	0.266188	16.7842	2.79926	14.0463		0.266188	12.5633	0.266188	3.10307	1.68236	3.61306
Mg7606	607	NXFT01000113.1.2963_g	IPR000866 Alkyl hydroperoxide reductase subunit C/ Thiol specific antioxidant IPR013766 Thioredoxin domain IPR019479 Peroxiredoxin 2C C-terminal IPR024706 Peroxiredoxin 2C AhpC-type IPR036249 Thioredoxin-like superfamily	0.0	Minc3s00258g08778	IPR000866 Alkyl hydroperoxide reductase subunit C/ Thiol specific antioxidant IPR013766 Thioredoxin domain IPR019479 Peroxiredoxin2C C-terminal IPR024706 Peroxiredoxin2C AhpC-type IPR036249 Thioredoxin-like superfamily	2.63e-103	CE31640	prdx-6	Probable peroxiredoxin	1e-36	O17433	Dirofilaria immitis	1-Cys peroxiredoxin	1e-58	-1.4509	1	0.107421	1	-0.242735	1	3.10038	3.70842		4.9727	3.22492	0.266188	4.98562	7.8654	5.71413		3.10849	0.266188	1.62007	3.8123	6.2849	5.2865
Mg78952	741				Minc3s00365g11069	IPR000866 Alkyl hydroperoxide reductase subunit C/ Thiol specific antioxidant IPR013766 Thioredoxin domain IPR019479 Peroxiredoxin2C C-terminal IPR024706 Peroxiredoxin2C AhpC-type IPR036249 Thioredoxin-like superfamily	2.64e-90	CE41559	prdx-2	Probable peroxiredoxin	2e-85	Q2PFZ3	Macaca fascicularis	Peroxiredoxin-2	9e-90	0	1	-5.07527	0.80591	-0.43293	1	0.266188	0.266188		0.266188	0.266188	0.266188	1.44605	0.266188	24.6217		0.266188	0.266188	0.266188	0.266188	2.74448	15.7455
Glutathione peroxidase
Mg2724	1721	NXFT01003287.1.8556_g	IPR000889 Glutathione peroxidase IPR029759 Glutathione peroxidase active site IPR036249 Thioredoxin-like superfamily	0.0	Minc3s00235g08236	IPR000889 Glutathione peroxidase IPR029759 Glutathione peroxidase active site IPR036249 Thioredoxin-like superfamily	8.15e-63	CE41834	gpx-7	Glutathione peroxidase	3e-28	Q00277	Schistosoma mansoni	Glutathione peroxidase	8e-29	1.1073	0.0376373	1.26948	0.0014096	1.03482	0.00244988	328.152	365.504		150.875	183.708	257.315	210.281	806.891	858.157		374.029	344.585	671.791	455.586	1788.89	1621.83
Mg3994	357	NXFT01003141.1.8186_g	IPR000889 Glutathione peroxidase IPR001254 Serine proteases 2C trypsin domain IPR009003 Peptidase S1 2C PA clan IPR029759 Glutathione peroxidase active site IPR029760 Glutathione peroxidase conserved site IPR036249 Thioredoxin-like superfamily	4.98e-117	Minc3s05633g38563	IPR000889 Glutathione peroxidase IPR029759 Glutathione peroxidase active site IPR029760 Glutathione peroxidase conserved site IPR036249 Thioredoxin-like superfamily	1.33e-50	CE08101	gpx-5	Glutathione peroxidase	3e-20	Q95003	Caenorhabditis elegans	Glutathione peroxidase	3e-12	-0.0501946	1	0.733265	0.770202	0.0250868	1	28.2509	29.8502		2.61945	23.9361	12.3736	14.4245	55.5188	57.6298		7.37195	16.6623	25.313	18.7059	53.3725	61.765
Mg52633	500				Minc3s01705g25750	IPR000889 Glutathione peroxidase IPR029759 Glutathione peroxidase active site IPR029760 Glutathione peroxidase conserved site IPR036249 Thioredoxin-like superfamily	7.00e-39	CE08102	gpx-3	Glutathione peroxidase 3	4e-40	P11352	Mus musculus	Glutathione peroxidase 1	3e-44	-7.78298	0.9222	-2.98449	0.788013	0.735999	1	0.313822	0.266188		7.32596	0.266188	7.71689	3.80577	0.266188	2.82993		0.266188	0.266188	1.62007	0.266188	0.266188	4.44978
Mg66478	688				Minc3s00235g08236	IPR000889 Glutathione peroxidase IPR029759 Glutathione peroxidase active site IPR036249 Thioredoxin-like superfamily	3.39e-51	CE09696	gpx-1	Glutathione peroxidase 1	2e-53	Q94694	Physarum polycephalum	Ras-related protein Rap-1	2e-62	6.38606	0.957669	-7.62585	0.724082	-0.633784	1	0.266188	0.266188		0.266188	0.266188	2.12886	4.98562	0.266188	2.82993		0.266188	2.99888	0.266188	0.266188	0.62023	1.52127
Mg70422	605				Minc3s00235g08236	IPR000889 Glutathione peroxidase IPR029759 Glutathione peroxidase active site IPR036249 Thioredoxin-like superfamily	1.10e-41	CE18107	gpx-2	Glutathione peroxidase 2	1e-49	Q63486	Rattus norvegicus	Ras-related GTP-binding protein A	1e-54	6.38693	0.967987	-7.94079	0.707702	-3.1123	0.827202	0.266188	0.266188		0.266188	0.266188	0.266188	8.5252	0.899456	6.996		0.266188	2.99888	0.266188	0.266188	0.266188	1.10291
Catalases
Mg14162	970				Minc3s01240g21983	IPR002226 Catalase haem-binding site IPR010582 Catalase immune-responsive domain IPR011614 Catalase core domain IPR018028 Catalase2C mono-functional2C haem-containing IPR020835 Catalase superfamily IPR024708 Catalase active site IPR024711 Catalase2C mono-functional2C haem-containing2C clades 1 and 3 IPR037060 Catalase core domain superfamily IPR040333 Catalase2C clade 3	1.84e-102	CE30713	ctl-1	Catalase-2	2e-91	Q9XZD5	Toxoplasma gondii	Peroxisomal catalase	2e-116	0.347763	1	0.659463	0.854815	1.64785	0.686819	0.361455	0.266188		4.9727	18.0186	9.57957	26.2231	1.53272	7.95741		8.7931	19.395	17.1897	38.5642	12.6577	14.9088
Mg1571	1607	NXFT01001626.1.4224_g	IPR002226 Catalase haem-binding site IPR010582 Catalase immune-responsive domain IPR011614 Catalase core domain IPR018028 Catalase 2C mono-functional 2C haem-containing IPR020835 Catalase superfamily IPR024708 Catalase active site IPR024711 Catalase 2C mono-functional 2C haem-containing 2C clades 1 and 3 IPR037060 Catalase core domain superfamily IPR040333 Catalase 2C clade 3	0.0	Minc3s01240g21983	IPR002226 Catalase haem-binding site IPR010582 Catalase immune-responsive domain IPR011614 Catalase core domain IPR018028 Catalase2C mono-functional2C haem-containing IPR020835 Catalase superfamily IPR024708 Catalase active site IPR024711 Catalase2C mono-functional2C haem-containing2C clades 1 and 3 IPR037060 Catalase core domain superfamily IPR040333 Catalase2C clade 3	0.0	CE22476	ctl-2	Peroxisomal catalase 1	0.0	P90682	Ascaris suum	Catalase	0.0	0.69507	0.335656	-0.0691445	0.987654	0.105808	0.990588	101.749	92.7973		75.5705	77.1933	183.74	140.669	228.559	188.381		116.801	130.069	166.117	143.529	245.617	203.17
Mg50883	1542				Minc3s01240g21983	IPR002226 Catalase haem-binding site IPR010582 Catalase immune-responsive domain IPR011614 Catalase core domain IPR018028 Catalase2C mono-functional2C haem-containing IPR020835 Catalase superfamily IPR024708 Catalase active site IPR024711 Catalase2C mono-functional2C haem-containing2C clades 1 and 3 IPR037060 Catalase core domain superfamily IPR040333 Catalase2C clade 3	0.0	CE22476	ctl-2	Peroxisomal catalase 1	0.0	O77229	Dictyostelium discoideum	Catalase-A	0.0	6.39619	0.951401	-1.18244	0.788013	-1.64298	0.73101	0.266188	0.266188		0.266188	0.266188	14.2363	30.9425	5.17401	23.3398		0.266188	2.99888	5.68171	14.4506	1.68236	7.79665
Mg705	1881	NXFT01003245.1.8444_g	IPR002226 Catalase haem-binding site IPR010582 Catalase immune-responsive domain IPR011614 Catalase core domain IPR018028 Catalase 2C mono-functional 2C haem-containing IPR020835 Catalase superfamily IPR024708 Catalase active site IPR024711 Catalase 2C mono-functional 2C haem-containing 2C clades 1 and 3 IPR037060 Catalase core domain superfamily	0.0	Minc3s00005g00340	IPR002226 Catalase haem-binding site IPR010582 Catalase immune-responsive domain IPR011614 Catalase core domain IPR018028 Catalase2C mono-functional2C haem-containing IPR020835 Catalase superfamily IPR024708 Catalase active site IPR024711 Catalase2C mono-functional2C haem-containing2C clades 1 and 3 IPR037060 Catalase core domain superfamily	0.0	CE22478	ctl-3	Catalase	5e-135	P90682	Ascaris suum	Catalase	3e-140	1.00431	0.437241	2.00211	0.0185868	2.46875	0.00303561	2438.36	1468.01		614.467	955.937	142.761	229.159	29.2382	20.4556		1586.27	1559.27	655.545	829.346	130.554	144.6
Mg7616	1876	NXFT01000415.1.10866_g	IPR002226 Catalase haem-binding site IPR003609 PAN/Apple domain IPR010582 Catalase immune-responsive domain IPR011614 Catalase core domain IPR018028 Catalase 2C mono-functional 2C haem-containing IPR020835 Catalase superfamily IPR024708 Catalase active site IPR037060 Catalase core domain superfamily	0.0	Minc3s07519g41218	IPR011614 Catalase core domain IPR018028 Catalase2C mono-functional2C haem-containing IPR020835 Catalase superfamily IPR024708 Catalase active site IPR037060 Catalase core domain superfamily	0.0	CE22476	ctl-2	Peroxisomal catalase 1	2e-161	Q27487	Caenorhabditis elegans	Peroxisomal catalase 1	4e-160	-0.217658	1	1.36773	0.782433	1.91032	0.475122	8.19717	7.22287		9.67922	12.1011	5.85422	0.266188	7.39045	2.82993		11.6354	7.09792	7.0356	8.77685	14.4279	23.2759
