# Supplementary material for: Analyses of the Root-Knot Nematode (Meloidogyne graminicola) Transcriptome during Host Infection Highlight Specific Gene Expression Profiling in Resistant Rice Plants
Source: Pathogens. 2020 Aug 8;9(8):644. doi: 10.3390/pathogens9080644 (PMC7460394; doi:10.3390/pathogens9080644)
Supplement: Supplementary file 1 [file pathogens-09-00644-s001.zip › Table S5.xlsx]

## Sheet: Feuil1
Table S5. List of M. graminicola effector or candidate effector genes, their annotation and their expression in rice susceptible or resistant plants. DEGs were identified by EdgeR with logFC >2 or <-2, FDR<0.05. No homolog was found for MiPM (Bournaud et al, 2018), MSP40 (Niu et al, 2016), Mi8D05 (Xue et al, 2013) and MiSGCR1 (Nguyen et al, 2018).
M. graminicola transcript	Length	SP & NLS prediction	Annotation		Best blastn hit					Best blastx hit												Normalised CPM value																	edgeR
			Predicted function or putative homolog (e-value)	References	M. graminicola CDS			M. graminicola genomic		M. incognita			C. elegans				Uniprot					pre-J2			in Nipponbare (S)							in Tog5681 (R )							LogFC (Tog2 vs Nip2)	FDR (Padj)	LogFC (Tog4 vs Nip4)	FDR (Padj)	LogFC (Tog8 vs Nip8)	FDR (Padj)	LogFC (Nip2 vs J2)	FDR (Padj)	LogFC (Nip4 vs Nip2)	FDR (Padj)	LogFC (Nip8 vs Nip4)
					CDS	Fonction	e-value	Contig	e-value	Protein	Fonction	e-value	Protein	Locus	Fonction	e-value	Protein	Species	Fonction	e-value		J2A	J2B		Nip2A	Nip2B	Nip4A	Nip4B	Nip8A	Nip8B		Tog2A	Tog2B	Tog4A	Tog4B	Tog8A	Tog8B
Meloidogyne graminicola effectors or candidate effectors identified as "DEG RvsS"
Mg1167	1344		Mj-NULG1a (1.80e-14)	Lin et al, 2013	NXFT01001189.1.3042_g		0.0	NXFT01001189.1	0.0													61.8563	68.0999		2.61945	3.22492	5.85422	9.70506	6.12392	2.82993		48.5854	78.1479	89.6224	36.4365	61.5155	44.6123		4.57999	0.0296354	3.08696	0.00494535	3.57833	0.000224175	-4.61514	0.000602669	1.48551	0.552026	-0.740842
Mg711	422	SP	transthyrethin-like	this study	NXFT01000945.1.2477_g	IPR001534 Transthyretin-like IPR038479 Transthyretin-like superfamily	7.16e-166	NXFT01000945.1	2.86e-79	Minc3s03739g34653	IPR001534 Transthyretin-like IPR038479 Transthyretin-like superfamily	1.28e-63	CE39742	ttr-45	TransThyretin-Related family domain	9e-38	Q22285	Caenorhabditis elegans	Transthyretin-like protein 46	8e-34		167.508	151.869		4.9727	18.0186	2.12886	0.266188	20.0558	17.8919		8.7931	15.296	11.7742	17.2875	18.3223	17.4189		0.142001	1	3.76705	0.0113641	-0.0901876	1	-3.89458	9.27992e-05	-3.35536	0.0312612	4.16304
Mg11937	835	SP	VAP	this study; Petitot et al, 2016	NXFT01002136.1.5657_g	IPR001283 Cysteine-rich secretory protein-related IPR014044 CAP domain IPR035940 CAP superfamily	1.17e-141	NXFT01003150.1	5.34e-139	Minc3s01051g20218	IPR001283 Cysteine-rich secretory protein-related IPR002413 Venom allergen 5-like IPR014044 CAP domain IPR018244 Allergen V5/Tpx-1-related2C conserved site IPR035940 CAP superfamily	8.25e-82	CE44291	vap-2	Venom-Allergen-like Protein	6e-20	Q16937	Ancylostoma caninum	Ancylostoma secreted protein	2e-18		4.43412	3.15478		0.266188	3.22492	3.0602	0.266188	1.69104	0.266188		3.10849	4.36523	43.5904	57.7131	37.7946	63.4384		1.37963	0.983108	5.03223	0.0181315	5.85923	0.00126662	-1.39995	0.734328	0.197052	1	-0.828817
Mg95	693		Mi-CM (3.96e-14)	Huang et al, 2005	NXFT01000888.1.2240_g	IPR002701 Chorismate mutase II 2C prokaryotic-type IPR019425 7TM GPCR 2C serpentine receptor class t (Srt) IPR036263 Chorismate mutase type II superfamily	0.0	NXFT01000888.1	2.65e-136	Minc3s01325g22793	IPR002701 Chorismate mutase II2C prokaryotic-type IPR036263 Chorismate mutase type II superfamily	2.42e-74										717.151	588.118		42.6248	23.9361	2.12886	7.34534	6.75718	2.50946		37.2162	68.5835	64.5756	161.259	43.4593	63.0201		0.650195	0.968538	4.72847	0.0363944	3.49526	0.0314888	-4.27904	0.00744153	-2.98427	0.151598	0.143976
Mg707	915		VAP	this study	NXFT01001750.1.4516_g	IPR001283 Cysteine-rich secretory protein-related IPR002413 Venom allergen 5-like IPR014044 CAP domain IPR035940 CAP superfamily	0.0	NXFT01001750.1	0.0	Minc3s00297g09642	IPR001283 Cysteine-rich secretory protein-related IPR002413 Venom allergen 5-like IPR014044 CAP domain IPR018244 Allergen V5/Tpx-1-related2C conserved site IPR035940 CAP superfamily	2.74e-77	CE30944	vap-1	Venom-Allergen-like Protein	2e-34	Q16937	Ancylostoma caninum	Ancylostoma secreted protein	1e-29		10.7217	13.4333		0.266188	0.266188	4.92288	4.98562	2.48263	3.79133		11.6354	13.9297	51.0367	39.9826	20.4466	13.6537		9.55794	0.087125	3.26684	0.00867031	2.57104	0.0135184	-9.47361	0.00563325	8.14305	0.169835	-0.732115
Mg1467	1081		MgGPP (1.30e-142)	Chen et al, 2017	NXFT01002213.1.5889_g	IPR036908 RlpA-like domain superfamily	8.89e-159	NXFT01002213.1	0.0	Minc3s00489g13197	IPR036908 RlpA-like domain superfamily	3.49e-40										415.7	325.3		96.7	121.6	7.7	6.2	3.4	1.9		138.1	210.7	57.8	87.5	13.4	21.2		0.68	0.7	3.42	0	2.73	0	-1.77014	0.00158355	-4.00621	2.77912e-05	-1.40366
Mg44061	199	SP	unknown	this study; Petitot et al, 2016																		0.432906	0.314332		0.266188	0.266188	0.266188	0.266188	0.266188	0.266188		0.266188	1.63253	15.1589	10.1953	132.678	12.3986		5.4187	1	9.54611	0.298489	12.0871	0.0201658	-2.90021	1	0	1	0
Mg1071	2069	SP	lysozyme	this study				NXFT01001527.1	0.0	Minc3s02310g29381	IPR008597 Invertebrate-type lysozyme IPR023346 Lysozyme-like domain superfamily	1.76e-14										19.534	29.5372		0.266188	0.266188	0.266188	2.62591	0.266188	1.22759		1.68734	5.73157	27.3438	39.9826	8.40915	9.47009		7.70943	0.825808	4.93512	0.0618059	4.47695	0.047796	-10.5115	0.0298063	6.03634	0.688481	-1.48534
Mg39	152		Mg16820 (1.42e-31)	Naalden et al, 2018				NXFT01000356.1	2.18e-16													459.76	422.96		28.51	151.16	7.72	10.88	1.85	1.55		139.54	134.17	54.42	84.66	17.26	44.19		0.64	0.96	2.95	0.2	4.35	0.04	-2.3346	0.0894965	-3.29114	0.0768198	-2.58894
Mg709	563		MilSE6 (5.32e-17)	Shi et al, 2018	NXFT01004122.1.10785_g		3.56e-150	NXFT01004122.1	6.56e-67	Minc3s00960g19313		1.13e-27										95.65	83.99		47.33	32.81	1.2	6.17	0.74	0.91		32.95	57.65	13.13	27.22	6.64	13.24		0.17	1	2.63	0.07	4.12	0	-1.15842	0.183739	-3.64196	0.00357838	-2.54108
Mg448	1109	SP	C-type lectin	this study	NXFT01003523.1.9191_g	IPR001304 C-type lectin-like IPR016186 C-type lectin-like/link domain superfamily IPR016187 C-type lectin fold	0.0	NXFT01003523.1	0.0	Minc3s00202g07456	IPR001304 C-type lectin-like IPR016186 C-type lectin-like/link domain superfamily IPR016187 C-type lectin fold	2.28e-33										379.905	255.521		82.6302	142.285	13.3049	17.9641	1.53272	1.54806		112.537	142.366	40.2057	68.3515	9.47128	19.0923		0.192457	1	1.82365	0.0518553	3.43282	0.000964657	-1.51148	0.020863	-2.8683	0.00131342	-3.56446
Mg757	553	SP	unknown	this study				NXFT01004226.1	4.45e-148													266.395	200.253		148.521	171.873	40.3137	62.7987	16.8895	14.0463		219.124	289.932	123.469	180.408	135.864	77.2443		0.671476	0.700181	1.57225	0.0194992	2.79746	9.03463e-05	-0.545564	0.358452	-1.64676	0.00677351	-1.73604
Mg233	454	SP	unknown	this study				NXFT01004101.1	3.83e-108	Minc3s01054g20252		1.84e-36										168.27	155.143		42.6248	53.5234	12.3736	23.8634	2.48263	0.907123		45.7431	90.4451	31.4055	59.8408	9.47128	10.3068		0.513944	0.956028	1.36598	0.253077	2.57404	0.0146312	-1.76292	0.0247632	-1.43593	0.142448	-3.44294
Mg32557	282	SP	unknown	this study	NXFT01001848.1.4801_g	IPR004988 Protein of unknown function DUF273	2.67e-19	NXFT01000121.1	1.17e-41													1.95718	1.13277		19.0923	12.1011	2.12886	1.44605	6.28223	5.0732		48.5854	71.3162	3.65089	5.23074	20.0925	33.3166		1.94391	0.256289	1.41546	0.705711	2.27401	0.0208113	3.58269	0.000967596	-3.30712	0.0151455	1.80038
Mg4471	682	SP	unknown	this study	NXFT01004084.1.10696_g		0.0	NXFT01004084.1	0.0	Minc3s00958g19291		1.14e-101										38.111	65.5965		35.5651	38.7297	14.2363	27.4029	3.59084	3.15039		31.5315	43.9893	23.2822	29.3443	12.6577	13.2353		0.0273905	1	0.356659	0.796221	2.011	0.0114992	-0.486499	0.627826	-0.856277	0.385976	-2.69175
Mg66296	469	SP	unknown	this study; Petitot et al, 2016																		0.266188	0.266188		0.266188	0.266188	37.5197	41.5613	0.899456	1.54806		0.266188	0.266188	0.266188	0.266188	0.266188	0.266188		0	1	-11.2053	0.0403239	-5.82637	0.433326	-5.12548e-15	1	11.2053	0.0488186	-5.3789
Meloidogyne graminicola effectors or candidate effectors identified as "DEG across"
Mg4965	797	SP	CLE-like	Petitot et al, 2016	NXFT01000694.1.1649_g		0.0	NXFT01000694.1	0.0	Minc3s00056g02893		1.03e-13										88.3882	62.6116		682.711	1015.11	52.4211	150.108	5.80728	5.0732		770.531	641.083	181.686	122.252	11.2415	11.9802		-0.264983	1	0.59907	0.782433	1.11434	0.574252	3.49389	0.00183464	-3.08088	0.00571355	-4.25629
Mg12162	840	SP	unknown	Petitot et al, 2016	NXFT01001934.1.4997_g		0.0	NXFT01001934.1	0.0	Minc3s03854g34991		3.67e-27										4.57702	1.34941		308.543	337.562	24.481	80.4966	2.95758	2.18899		203.491	166.96	35.4671	20.1244	4.16065	3.61306		-0.802823	0.9542	-0.900608	0.782433	0.605666	0.975131	6.89301	0.00173709	-2.64695	0.0935073	-4.42423
Mg12322	500	SP	unknown	Petitot et al, 2016				NXFT01000908.1	0.0													0.790157	0.482833		153.228	225.13	67.3225	41.5613	1.21609	4.1118		115.38	83.6133	42.2365	24.3797	8.7632	5.2865		-0.924726	0.86563	-0.719043	0.782433	1.68384	0.387803	8.92547	1.63687e-05	-1.78912	0.0946162	-4.67872
Mg16593	1178	SP_NLS	unknown	Petitot et al, 2016	NXFT01000737.1.1775_g		0.0	NXFT01000737.1	0.0													1.29031	1.63827		70.8639	12.1011	166.976	146.569	24.8053	29.1083		37.2162	11.197	117.377	101.685	42.7512	58.8365		-0.841019	0.947069	-0.519023	0.788361	0.922682	0.713114	5.13636	0.00182145	1.87433	0.161201	-2.55602
Mg17098	462	SP_NLS	unknown	Petitot et al, 2016	NXFT01000810.1.188_g		8.17e-141	NXFT01000810.1	5.01e-112													9.38801	7.15066		37.9183	91.987	2.12886	20.3238	1.21609	0.907123		59.9546	46.722	11.0972	5.93996	2.74448	1.10291		-0.272727	1	-0.353438	0.952822	1.02023	0.855808	2.99902	0.0213425	-2.59807	0.0803185	-3.64862
Mg17272	1329	SP	unknown	Petitot et al, 2016	NXFT01001287.1.3294_g		0.0	NXFT01001287.1	0.0													0.480539	0.506904		7.32596	15.0599	1.19753	2.62591	0.899456	0.266188		4.52965	1.63253	0.943129	0.266188	0.266188	0.684547		-1.94683	0.977224	-2.19253	0.80591	-0.729687	1	8.02696	5.51185e-05	-1.46417	0.25037	-4.9392
Mg40980	242	SP	metallothionein	Petitot et al, 2016				NXFT01000121.1	7.68e-43													0.456722	0.675405		696.831	612.724	115.752	213.821	2.16599	3.15039		483.458	452.527	118.731	67.6422	7.34703	11.5619		-0.485398	0.9222	-0.818586	0.547451	1.98599	0.0698855	11.016	3.82938e-07	-1.99722	0.0106342	-6.15215
Mg13532	565	SP	MgM0237 (4.03e-53)	Chen et al, 2018				NXFT01000655.1	3.69e-114													11.7	9.97		92.04	59.44	154.87	69.88	88.92	58.59		50.01	38.52	63.22	71.19	67.89	41.27		-0.79	0.8	-0.75	0.59	-0.44	0.78	2.8456	0.000341391	0.566612	0.600763	-0.612011
Mg5375	1356	SP_NLS	Mi-EFF1 (1.53e-28)	Jaouannet et al, 2012	NXFT01001400.1.3598_g		1.93e-136	NXFT01001400.1	9.22e-104	Minc3s01563g24741		4.41e-25										45	25		118	92	2763	1264	1221	804		50	96	830	980	1445	1251.58		-0.53	0.96	-1.15	0.53	0.75	0.73	1.60413	0.13362	4.25942	0.00517397	-0.991678
Mg51930	725		MgMSP18 (2.89e-104)	Grossi de Sa et al, 2019	NXFT01004189.1.10895_g		0.0	NXFT01004189.1	0.0	Minc3s00173g06738		3.14e-15										0.29	0.39		0.27	0.27	0.27	0.27	28.76	33.92		0.27	1.63	0.94	4.52	28.94	61.76		5.42	0.96	7.21	0.37	0.54	0.95	-2.41291	1	0	1	10.8668
Mg34968	584		Misp12 (1.16e-13)	Xie et al, 2016	NXFT01004189.1.10894_g		0.0	NXFT01004189.1	0.0	Minc3s00173g06738		2.30e-37										0.74	0.63		0.27	0.27	11.44	0.27	49.34	37.12		0.27	0.27	2.97	2.39	93.03	128.28		0	1	-1.29	0.78	1.36	0.58	-4.70998	0.840746	8.4872	0.355072	2.85059
Mg46	1560		MjFAR1 (2.73e-14)	Iberkleid et al, 2013	NXFT01002434.1.6438_g	IPR002999 Tudor domain IPR004087 K Homology domain IPR004088 K Homology domain 2C type 1 IPR008632 Nematode fatty acid retinoid binding IPR033104 A-kinase anchor protein 1 2C mitochondrial IPR035437 SNase-like 2C OB-fold superfamily IPR036612 K Homology domain 2C type 1 superfamily	9.08e-46	NXFT01002434.1	0.0	Minc3s00096g04440	IPR008632 Nematode fatty acid retinoid binding	5.13e-14										51.02	38.93		12.03	6.18	21.69	10.88	51.24	41.93		10.21	9.83	17.87	27.93	39.21	39.17		0.1	1	0.48	0.78	-0.25	0.95	-2.29819	0.00572718	0.838135	0.556966	1.51315
Other Meloidogyne graminicola effectors or candidate effectors
Mg28330	328	SP	unknown	Petitot et al, 2016																		0.980691	0.579119		9.67922	18.0186	0.266188	0.266188	0.266188	0.266188		0.266188	0.266188	0.266188	0.266188	0.266188	0.266188		-9.67079	0.785411	0	1	0	1	4.67622	0.415877	-9.67079	0.349882	0
Mg46375	358	SP	unknown	Petitot et al, 2016				NXFT01001487.1	2.57e-29													0.290005	0.314332		16.739	20.9773	0.266188	0.266188	0.266188	0.266188		3.10849	0.266188	1.62007	0.266188	0.266188	0.266188		-3.70229	0.9222	5.39283	0.788013	0	1	8.46526	0.10954	-10.1261	0.270496	0
Mg92	793		Mg01965 (1.35e-111)	Zhuo et al, 2019	NXFT01001951.1.5037_g	IPR001304 C-type lectin-like IPR016186 C-type lectin-like/link domain superfamily IPR016187 C-type lectin fold IPR018378 C-type lectin 2C conserved site	0.0	NXFT01001951.1	0.0	Minc3s00066g03329	IPR001304 C-type lectin-like IPR016186 C-type lectin-like/link domain superfamily IPR016187 C-type lectin fold IPR018378 C-type lectin2C conserved site	2.53e-121										83.72	68.65		26.15	44.65	2.13	9.71	0.9	0.27		59.95	33.06	21.93	11.61	2.39	9.05		0.41	1	1.62	0.66	3.67	0.1	-1.12749	0.47677	-2.68669	0.131305	-3.68159
Mg1376	2626	SP	MgPDI (0.0)	Tian et al, 2019	NXFT01000624.1.1457_g	IPR005788 Disulphide isomerase IPR005792 Protein disulphide isomerase IPR013766 Thioredoxin domain IPR017937 Thioredoxin 2C conserved site IPR036249 Thioredoxin-like superfamily	0.0	NXFT01000624.1	0.0	Minc3s01680g25548	IPR005788 Disulphide isomerase IPR005792 Protein disulphide isomerase IPR013766 Thioredoxin domain IPR017937 Thioredoxin2C conserved site IPR036249 Thioredoxin-like superfamily IPR041868 Protein disulfide-isomerase A32C first redox inactive TRX-like domain b	1.07e-100	CE11570	pdi-3	Protein disulfide-isomerase	2e-71	Q8JG64	Gallus gallus	Protein disulfide-isomerase A3	4e-43		662.325	518.359		456.798	467.746	731.366	704.642	671.53	651.135		379.714	389.675	558.065	509.487	520	409.003		-0.264999	0.88673	-0.427973	0.300938	-0.509776	0.114195	-0.353145	0.213104	0.635769	0.0270277	-0.118689
Mg5681	4157		MjTTL5 (8.70e-78)	Lin et al, 2016	NXFT01003848.1.10014_g	IPR002501 Pseudouridine synthase II 2C N-terminal IPR020103 Pseudouridine synthase 2C catalytic domain superfamily IPR039048 Mitochondrial mRNA pseudouridine synthase Trub2	0.0	NXFT01003848.1	0.0	Minc3s03016g32443	IPR001478 PDZ domain IPR036034 PDZ superfamily IPR040264 Uncharacterized protein T15H9.4-like IPR041489 PDZ domain 6	1.68e-174	CE24279			4e-60	Q55C17	Dictyostelium discoideum	Trans-2,3-enoyl-CoA reductase	5e-45		38.37	34.83		30.86	38.73	95.26	88.76	78.32	65.96		28.6892	64.4845	72.6988	60.55	122.411	100.254		0.44	0.93	-0.47	0.73	0.63	0.44	-0.08312	1	1.41967	0.0192753	-0.351106
Mg366	3830		Me-TCTP (2.99e-44)	Zhuo et al, 2017	NXFT01001304.1.3334_g	IPR001273 Aromatic amino acid hydroxylase IPR002912 ACT domain IPR018301 Aromatic amino acid hydroxylase 2C iron/copper binding site IPR019773 Tyrosine 3-monooxygenase-like IPR019774 Aromatic amino acid hydroxylase 2C C-terminal IPR036329 Aromatic amino acid monoxygenase 2C C-terminal domain superfamily IPR036951 Aromatic amino acid hydroxylase superfamily	0.0	NXFT01001304.1	0.0	Minc3s00065g03318	IPR001273 Aromatic amino acid hydroxylase IPR002912 ACT domain IPR005961 Phenylalanine-4-hydroxylase2C tetrameric form IPR018301 Aromatic amino acid hydroxylase2C iron/copper binding site IPR019773 Tyrosine 3-monooxygenase-like IPR019774 Aromatic amino acid hydroxylase2C C-terminal IPR036329 Aromatic amino acid monoxygenase2C C-terminal domain superfamily IPR036951 Aromatic amino acid hydroxylase…	1.77e-164	CE47563	pah-1	Phenylalanine-4-hydroxylase	2e-132	Q2KIH7	Bos taurus	Phenylalanine-4-hydroxylase	2e-139		466.57	425.42		548.58	580.18	1031.26	677.51	660.45	600.82		598.57	488.05	750.99	700.98	760.39	710.64		-0.05	1	-0.24	0.78	0.22	0.77	0.339463	0.317892	0.599473	0.0679967	-0.438783
Mg34	2265		Mh265 (4.12e-107)	Gleason et al, 2017	NXFT01003074.1.8031_g		0.0	NXFT01003074.1	0.0	Minc3s00063g03192	IPR001388 Synaptobrevin IPR010908 Longin domain IPR011012 Longin-like domain superfamily	1.25e-140	CE19895	sec-22	Yeast SEC homolog	3e-82	Q7SXP0	Danio rerio	Vesicle-trafficking protein SEC22b-B	3e-59		216.52	193.92		68.51	59.44	118.55	84.04	78.16	73.65		101.17	68.58	97.07	106.65	83.11	79.34		0.4	0.89	0	1	0.1	1	-1.68111	0.000260254	0.664392	0.170689	-0.420551
Mg43732	1649	SP	Mi-CRT (2.57e-163)	Jaouannet et al, 2013						Minc3s00127g05433	IPR001580 Calreticulin/calnexin IPR009033 Calreticulin/calnexin2C P domain superfamily IPR009169 Calreticulin IPR013320 Concanavalin A-like lectin/glucanase domain superfamily IPR018124 Calreticulin/calnexin2C conserved site	1.87e-166	CE21562	crt-1	Calreticulin	1e-143	Q7Z1E6	Bombyx mori	Calreticulin	2e-163		0.46	0.27		0.27	12.1	41.25	310.57	20.85	85.19		0.27	20.76	0.27	4.52	23.99	20.35		0.95	1	-6.37	0.3	-1.25	0.92	5.58008	0.52535	5.02404	0.330696	-1.74085
Mg4038	1576		MiPFN3 (1.32e-55)	Leelarasamee et al, 2018	NXFT01000848.1.2131_g	IPR000990 Innexin	8.02e-141	NXFT01000848.1	0.0	Minc3s00239g08313	IPR005455 Profilin IPR036140 Profilin superfamily	3.84e-55	CE07332	pfn-3	Profilin-3	1e-36	Q21193	Caenorhabditis elegans	Profilin-3	2e-35		85.72	91.57		28.51	23.94	25.41	15.6	15.15	16.61		31.53	63.12	23.28	29.34	20.09	28.71		0.85	0.74	0.35	0.79	0.63	0.64	-1.75982	0.00822004	-0.351753	0.759083	-0.391162
Mg5715	2677		MilSE5 (3.38e-48)	Shi et al, 2018	NXFT01002127.1.5620_g	IPR013087 Zinc finger C2H2-type IPR036236 Zinc finger C2H2 superfamily	0.0	NXFT01002127.1	0.0	Minc3s00235g08213	IPR013087 Zinc finger C2H2-type IPR036236 Zinc finger C2H2 superfamily	8.45e-52	CE23571	odd-2	Protein odd-skipped-related 2	3e-25	P23803	Drosophila melanogaster	Protein odd-skipped	7e-26		39.68	32.69		2.62	29.85	12.37	6.17	21.64	17.57		27.27	24.86	13.81	20.83	25.76	15.33		0.76	0.96	0.9	0.78	0.07	1	-1.24259	0.328424	-0.727848	0.710865	1.08129
References
Bournaud, C.; Gillet, F.X.; Murad, AM.; Bresso, E.; Albuquerque, E.V.S.; Grossi-de-Sá, M.F. Meloidogyne incognita PASSE-MURAILLE (MiPM) gene encodes a cell-penetrating protein that interacts with the CSN5 subunit of the COP9 signalosome. Front. Plant Sci. 2018, 9, 904. doi: 10.3389/fpls.2018.00904
Chen, J.; Lin, B.; Huang, Q.; Hu, L.; Zhuo, K.; Liao, J. A novel Meloidogyne graminicola effector; MgGPP; is secreted into host cells and undergoes glycosylation in concert with proteolysis to suppress plant defenses and promote parasitism. PLoS Pathog. 2017, 13, e1006301. doi: 10.1371/journal.ppat.1006301.
Chen, J.; Hu L.; Sun, L.; Lin, B.; Huang, K.; Zhuo, K.; Liao, J. A novel Meloidogyne graminicola effector, MgMO237, interacts with multiple host defence-related proteins to manipulate plant basal immunity and promote parasitism. Mol. Plant Pathol. 2018. doi: 10.1111/mpp.12671.
Gleason, C.; Polzin, F.; Habash, S.S.; Zhang, L.; Utermark, J.; Grundler, F.M.; Elashry, A. Identification of two Meloidogyne hapla genes and an investigation of their roles in the plant-nematode interaction. Mol. Plant Microbe Interact. 2017, 30, 101-112. doi: 10.1094/MPMI-06-16-0107-R.
Grossi-de-Sa, M.; Petitot, A.S.; Xavier, D.A.; Sá, M.E.L.; Mezzalira, I.; Beneventi, M.A.; Martins, N.F.; Baimey, H.K.; Albuquerque, E.V.S.; Grossi-de-Sa, M.F.; Fernandez, D. Rice susceptibility to root-knot nematodes is enhanced by the Meloidogyne incognita MSP18 effector gene. Planta 2019, 250, 1215-1227. doi:10.1007/s00425-019-03205-3.
Huang, G.; Dong, R.; Allen, R.; Davis, E.L.; Baum, T.J.; Hussey, R.S. Two chorismate mutase genes from the root-knot nematode Meloidogyne incognita. Mol. Plant Pathol. 2005, 6, 23-30. doi: 10.1111/j.1364-3703.2004.00257.x.
Iberkleid, I.; Vieira, P.; de Almeida Engler, J.; Firester, K.; Spiegel, Y.; Horowitz, S.B. Fatty acid-and retinol-binding protein, Mj-FAR-1 induces tomato host susceptibility to root-knot nematodes. PLoS One 2013, 8, e64586. doi:10.1371/journal.pone.0064586.
Jaouannet, M.; Perfus-Barbeoch, L.; Deleury, E.; Magliano, M.; Engler, G.; Vieira, P.; Danchin, E.G.; Da Rocha, M.; Coquillard, P.; Abad, P.; Rosso, M.N. A root-knot nematode-secreted protein is injected into giant cells and targeted to the nuclei. New Phytol. 2012, 194, 924-931. doi: 10.1111/j.1469-8137.2012.04164.x.
Jaouannet, M.; Magliano, M.; Arguel, M.J.; Gourgues, M.; Evangelisti, E.; Abad, P.; Rosso, M.N. The root-knot nematode calreticulin Mi-CRT is a key effector in plant defense suppression. Mol. Plant Microbe Interact. 2013, 26, 97-105. doi:10.1094/MPMI-05-12-0130-R.
Leelarasamee, N.; Zhang, L.; Gleason, C. The root-knot nematode effector MiPFN3 disrupts plant actin filaments and promotes parasitism. PLoS Pathog. 2018, 14, e1006947. doi: 10.1371/journal.ppat.1006947.
Lin, B.; Zhuo, K.; Chen, S.; Hu, L.; Sun, L.; Wang, X.; Zhang, LH.; Liao, J. A novel nematode effector suppresses plant immunity by activating host reactive oxygen species-scavenging system. New Phytol. 2016, 209, 1159-1173. doi: 10.1111/nph.13701.
Lin, B.; Zhuo, K.; Wu, P.; Cui, R.; Zhang, LH.; Liao, J. A novel effector protein.; MJ-NULG1a.; targeted to giant cell nuclei plays a role in Meloidogyne javanica parasitism. Mol. Plant Microbe Interact. 2013, 26, 55-66. doi: 10.1094/MPMI-05-12-0114-FI.
Naalden, D.; Haegeman, A.; de Almeida-Engler, J.; Birhane Eshetu, F.; Bauters, L.; Gheysen, G. The Meloidogyne graminicola effector Mg16820 is secreted in the apoplast and cytoplasm to suppress plant host defense responses. Mol. Plant Pathol. 2018, 19, 2416-2430. doi: 10.1111/mpp.12719.
Nguyen, C.N.; Perfus-Barbeoch, L.; Quentin, M.; Zhao, J.; Magliano, M.; Marteu, N.; Da Rocha, M.; Nottet, N.; Abad, P.; Favery, B. A root-knot nematode small glycine and cysteine-rich secreted effector, MiSGCR1, is involved in plant parasitism. New Phytol. 2018, 217, 687-699. doi: 10.1111/nph.14837.
Niu, J.; Liu, P.; Liu, Q.; Chen, C.; Guo, Q.; Yin, J.; Yang, G.; Jian, H. Msp40 effector of root-knot nematode manipulates plant immunity to facilitate parasitism. Sci. Rep. 2016, 6, 19443. doi: 10.1038/srep19443.
Petitot, A.S.; Dereeper, A.; Agbessi, M.; Da Silva, C.; Guy, J.; Ardisson, M.; Fernandez, D. Dual RNA-seq reveals Meloidogyne graminicola transcriptome and candidate effectors during the interaction with rice plants. Mol. Plant Pathol. 2016, 17, 860-874. doi: 10.1111/mpp.12334.
Shi, Q.; Mao, Z.; Zhang, X.; Zhang, X.; Wang, Y.; Ling, J.; Lin, R.; Li, D.; Kang, X.; Sun, W.; Xie, B. A Meloidogyne incognita effector MiISE5 suppresses programmed cell death to promote parasitism in host plant. Sci Rep. 2018, 8, 7256. doi:10.1038/s41598-018-24999-4.
Shi, Q.; Mao, Z.; Zhang, X.; Ling, J.; Lin, R.; Zhang, X.; Liu, R.; Wang, Y.; Yang, Y.; Cheng, X.; Xie, B. The novel secreted Meloidogyne incognita effector MiISE6 targets the host nucleus and facilitates parasitism in Arabidopsis. Front. Plant Sci. 2018, 9, 252. doi: 10.3389/fpls.2018.00252.
Tian, Z.L.; Wang, Z.H.; Maria, M.; Qu, N.; Zheng, J.W. Meloidogyne graminicola protein disulfide isomerase may be a nematode effector and is involved in protection against oxidative damage. Sci. Rep. 2019, 9, 11949. doi: 10.1038/s41598-019-48474-w.
Xie, J.; Li, S.; Mo, C.; Wang, G.; Xiao, X; Xiao, Y. A novel Meloidogyne incognita effector Misp12 suppresses plant defense response at latter stages of nematode parasitism. Front. Plant Sci. 2016, 7, 964. doi: 10.3389/fpls.2016.00964.
Xue, B.; Hamamouch, N.; Li, C.; Huang, G.; Hussey, R.S.; Baum, T.J.; Davis, E.L. The 8D05 parasitism gene of Meloidogyne incognita is required for successful infection of host roots. Phytopathology 2013, 103, 175-181. doi: 10.1094/PHYTO-07-12-0173-R.
Zhuo, K.; Naalden, D.; Nowak, S.; Xuan Huy, N.; Bauters, L.; Gheysen, G. A Meloidogyne graminicola C-type lectin, Mg01965, is secreted into the host apoplast to suppress plant defence and promote parasitism. Mol. Plant Pathol. 2019, 20, 346-355. doi: 10.1111/mpp.12759.
Zhuo, K.; Chen, J.; Lin, B.; Wang, J.; Sun, F.; Hu, L.; Liao, J. A novel Meloidogyne enterolobii effector MeTCTP promotes parasitism by suppressing programmed cell death in host plants. Mol. Plant Pathol. 2017, 18, 45-54. doi: 10.1111/mpp.12374.
[truncated: 7 more columns]
