# Supplementary material for: Analyses of the Root-Knot Nematode (Meloidogyne graminicola) Transcriptome during Host Infection Highlight Specific Gene Expression Profiling in Resistant Rice Plants
Source: Pathogens. 2020 Aug 8;9(8):644. doi: 10.3390/pathogens9080644 (PMC7460394; doi:10.3390/pathogens9080644)
Supplement: Supplementary file 1 [file pathogens-09-00644-s001.zip › Table S6.xlsx]

## Sheet: Feuil1
Table S1. Sequences of primers used for gene cloning, qPCR and soaking.
Primers (cloning)	Sequences (5' -> 3')
Mg693-F	CACCATGCTTTCTTTTATTCTCTTTTCTTTG
Mg693-R	TAAGCTTTAGGTGTTAATTGTTCAGC
Mg1702-F	CACCATGAAAGGAATATTAATTCAGC
Mg1702-R	TTAATTAGCGATAACTTCCACTC
Mg2129-F	CACCATGAACAAAAATTTATTAAATTC
Mg2129-R	TTATCCAAATCTAATAAATTTTTG
Mg707-F	CACCATGTTTTTATTATTCCTATTATTTAC
Mg707-R	TTAACTGCAAAGTCCAGAATTAGAAGA
Mg44061-F	CACCATGTCGGTCAAAAAACTCATCGC
Mg44061-R	TCCTCCTCTTCCTCCAAGAGAGC
Primers (Q-PCR)	Sequences (5' -> 3')
Mg449-Q-F	GGCATACTCATATGGAGGAATGAC
Mg449-Q-R	TCACGATTGAACAGCAGTAACTAC
Mg693-Q-F	GATATTCACCAGCAACGAATGA
Mg693-Q-R	CAATCCTGTCCATCAGCTGTAA
Mg1702-Q-F	ACATGAGGTCAAGGCAGCTTCTC
Mg1702-Q-R	ATGGTCGATAGTCTCTGTCATCGC
Mg2129-Q-F	AAGCAGCATTGGCGGAAGAATC
Mg2129-Q-R	CACGGGCTTCTCGTTCAAACC
Mg707-qF	CCTGTAACAGTTGGTGGTCTGA
Mg707-qR	CCGGAGGACTGTATTGACAAA
Mg11937-Q-F	TGAAGTTGGTTGTGCTGTTGGAC
Mg11937-R	TTATTCATAAGAATCCTCATCAT
Mg757-Q-F	AAGTAATGATAATGGAGGCTTTCCC
Mg757-Q-R	TCTTCATCAGATTCTTGTTGTTTGC
Mg4965-Q-F	CAGCCGCAAGGACAAGTAGC
Mg4965-Q-R	CAGGAGTTGATACAGGACCATTAGG
Mg12322-Q-F	TGTGCTAGTTGTGGACTTCAAGG
Mg12322-Q-R	TTTGCATCAGGGATACATGATTTCG
Mg13532-Q-F	GGTTTCAACACGCTTTTCTGAGG
Mg13532-Q-R	GCTTGCCGTATATCCAGTAGATGG
Mg17272-Q-F	AATTTGGTTTGTGCTTCGGAGTAG
Mg17272-Q-R	AAGATGAGCTGTGTTCATTTAGGC
Mg44061-Q-F	CTCATCGCTGTCGCTCTCATTG
Mg44061-Q-R	TCCTCTTCCTCTTGGTCATTCTGG
Mg-ACT-Q-F	AAGATCCTCACTGAGCGTGGTTAC
Mg-ACT-Q-R	CTTGACCGTCAGGCAATTCATAGC
Primers (soaking)	Sequences (5' -> 3')
siMgVAP1-AS	AATACAAGCCTGTAACAGTTGCCTGTCTC
siMgVAP1-S	AACAACTGTTACAGGCTTGTACCTGTCTC
siMgVAP2-AS	AAGTTGGTTGTGCTGTTGGACCCTGTCTC
siMgVAP2-S	AAGTCCAACAGCACAACCAACCCTGTCTC
siGFP-AS	AAACATTCTCGGCCACAAGCTCCTGTCTC
siGFP-S	AAAGCTTGTGGCCGAGAATGTCCTGTCTC
